# Supplementary material for: Interrupted Pyridine Hydrogenation: Asymmetric Synthesis of δ‐Lactams
Source: PubMed Central journal article supplement — Angew Chem Int Ed Engl. 2021 Feb 12;60(12):6425–9. doi: 10.1002/anie.202016771 (PMC7986189; doi:10.1002/anie.202016771), 2021-02-12

Supporting Information

**Interrupted Pyridine Hydrogenation: Asymmetric Synthesis of  $\delta$ -Lactams**

*Tobias Wagener<sup>+</sup>, Lukas Lückemeier<sup>+</sup>, Constantin G. Daniliuc, and Frank Glorius\**

anie\_202016771\_sm\_miscellaneous\_information.pdf

## *Supporting Information*

### **Table of Contents**

|                                                                                    |     |
|------------------------------------------------------------------------------------|-----|
| 1. General Information.....                                                        | S2  |
| 2. Synthesis of Starting Materials .....                                           | S3  |
| 3. Investigation of Reaction Parameters .....                                      | S16 |
| 4. Reaction-Condition-Based Sensitivity Assessment.....                            | S18 |
| 5. Catalytic Hydrogenation Reactions.....                                          | S20 |
| 6. Gram-Scale Hydrogenation and Hydrolytic Ring Opening of $\delta$ -Lactams ..... | S46 |
| 7. Mechanistic Investigation.....                                                  | S49 |
| 8. X-Ray Data.....                                                                 | S53 |
| 9. Literature .....                                                                | S56 |
| 10. NMR Data .....                                                                 | S57 |

## 1. General Information

Unless otherwise noted, all reactions for starting material synthesis were carried out under an atmosphere of argon in oven-dried glassware. Catalytic hydrogenation reactions were prepared under air without further care of excluding moisture. Reaction temperatures are reported as the temperature of the bath surrounding the vessel unless otherwise stated. The solvents used for starting material synthesis were purified by distillation over the drying agents indicated in parentheses and were transferred under argon: toluene (CaH<sub>2</sub>), dichloromethane (CaH<sub>2</sub>), and THF (Na-benzophenone). Ethanol (4 Å) and methanol (3 Å) were purchased as dry solvents from commercial suppliers and stored over molecular sieves. Solvents for hydrogenation reactions (methanol, THF) were purchased as reagent grade solvents (>99%) and used as received. All hydrogenation reactions were carried out in Berghof High Pressure Reactors using hydrogen gas.

Commercially available chemicals were obtained from Acros Organics, Aldrich Chemical Co., Strem Chemicals, Alfa Aesar, ABCR, Combi-Blocks, Chempur and TCI Europe and used as received. Heterogeneous catalysts were obtained from Johnson Matthey (Rh/C, 5 wt%, Ru/C, 5 wt%), Sigma Aldrich (Pd(OH)<sub>2</sub>/C, 20 wt%) Evonik Industries (Pd/C, 10 wt%), Acros Organics (PtO<sub>2</sub>) or Alfa Aesar (Rh/Al<sub>2</sub>O<sub>3</sub>, 5 wt%) and used as received. Catalytic hydrogenations were conducted using 5 wt% Pd/C from Evonik Industries (PMPC SP1010 D, eggshell reduced).

Analytical thin layer chromatography (TLC) was performed on silica gel 60 F254 aluminum plates (Merck). TLC plates were visualized by exposure to short wave ultraviolet light (254 nm, 366 nm) and were dipped into a solution of KMnO<sub>4</sub>. Flash chromatography was performed on Acros Organics silica gel (35-70 mesh) under a positive pressure of argon, eluting with the specified solvent system. GC-MS spectra were recorded on an Agilent Technologies 7890A GC-system with an Agilent 5975C VL MSD or an Agilent 5975 inert Mass Selective Detector (EI) and a HP-5MS column (0.25 mm x 30 m, film: 0.25 μm). ESI mass spectra were recorded on a Bruker Daltonics MicroTof spectrometer. <sup>1</sup>H, <sup>13</sup>C, and <sup>19</sup>F NMR spectra were recorded on a Bruker Avance II300 or Avance II400, AgilentDD2 500 or AgilentDD2 600 in the indicated solvents. Chemical shifts (δ) are given in ppm relative to TMS. The residual solvent signals were used as references and the chemical shifts converted to the TMS scale (CDCl<sub>3</sub>: δ<sub>H</sub> = 7.26 ppm, δ<sub>C</sub> = 77.16 ppm; CD<sub>3</sub>OD: δ<sub>H</sub> = 3.31 ppm, δ<sub>C</sub> = 49.0 ppm. <sup>19</sup>F NMR spectra are referenced according to the proton resonance of TMS as the primary reference for the unified chemical shift scale (IUPAC recommendation 2001). Broadband <sup>19</sup>F-decoupled <sup>13</sup>C spectra were recorded using the WURST decoupling method.

## 2. Synthesis of Starting Materials

### General Procedure 1 for oxazolidinone-coupling from bromopyridines (GP1):

Oxazolidinone-substituted pyridines were prepared based on a literature procedure reported by Buchwald and coworkers.<sup>[1]</sup> An oven-dried Schlenk tube was charged with the corresponding 2-brominated pyridine (1.0 equiv.), the corresponding 2-oxazolidinone (1.0 equiv.), K<sub>2</sub>CO<sub>3</sub> (1.3 equiv.), CuI (5 mol%) and 1,10-phenanthroline (10 mol%) and was put under an argon atmosphere. Dry toluene (0.5 M) was added to the solids and the mixture was stirred at 140 °C for 16 h. After cooling to room temperature, the reaction mixture was filtered through a silica pad and concentrated in *vacuo*. The residue was purified by column chromatography on silica gel.

### General Procedure 2 for oxazolidinone coupling starting from chloropyridines (GP2):

Oxazolidinone-substituted pyridines were prepared based on a literature procedure reported by Buchwald and coworkers.<sup>[1]</sup> An oven-dried Schlenk tube was charged with the corresponding 2-chlorinated pyridine (1.0 equiv.), the corresponding 2-oxazolidinone (1.2 equiv.), K<sub>2</sub>CO<sub>3</sub> (2.0 equiv.) and CuI (50 mol%) and was put under an argon atmosphere. Dry toluene (0.5 M) and *N,N*-dimethylethylenediamine (50 mol%) were added to the solids and the mixture was stirred at 140 °C for 16 h. After cooling to room temperature, the reaction mixture was filtered through a silica pad and concentrated in *vacuo*. The residue was purified by column chromatography on silica gel.

### General Procedure 3 for Suzuki coupling (GP3):

An oven-dried Schlenk tube was charged with the corresponding halogenated pyridine (1.0 equiv.), arylboronic acid (1.2 equiv.), K<sub>2</sub>CO<sub>3</sub> (4.8 equiv.) and Pd(PPh<sub>3</sub>)<sub>4</sub> (5 mol%). THF and H<sub>2</sub>O were added and the mixture was stirred at the indicated temperature for 16 h. After cooling to room temperature, H<sub>2</sub>O was added and the aqueous layer extracted using CH<sub>2</sub>Cl<sub>2</sub> (3×). The combined organics were dried over MgSO<sub>4</sub> and concentrated in *vacuo*. The residue was purified by column chromatography on silica gel.

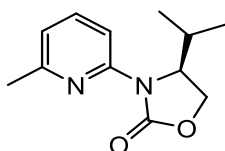

**(S)-4-Isopropyl-3-(6-methylpyridin-2-yl)oxazolidin-2-one:** The title compound was prepared according to GP1 from 2-bromo-6-methylpyridine (460  $\mu$ L, 4.0 mmol, 1.0 equiv.), (S)-4-isopropylloxazolidin-2-one (517 mg, 4.0 mmol, 1.0 equiv.), CuI (38.1 mg, 0.2 mmol, 5 mol%), 1,10-phenanthroline (72.0 mg, 0.4 mmol, 10 mol%) and  $K_2CO_3$  (719 mg, 5.2 mmol, 1.3 equiv.) in toluene (4 mL) at 140  $^{\circ}C$ . The product was isolated after column chromatography (eluent: *n*-pentane/EtOAc 6:1, later 4:1) as white solid (780 mg, 3.5 mmol, 89%).

**$^1H$  NMR** (400 MHz, Chloroform-*d*) 7.92 (d,  $J$  = 8.3 Hz, 1H), 7.58 (t,  $J$  = 7.9 Hz, 1H), 6.87 (d,  $J$  = 7.4 Hz, 1H), 4.90 (dt,  $J$  = 8.8, 3.7 Hz, 1H), 4.36 (t,  $J$  = 8.8 Hz, 1H), 4.27 (dd,  $J$  = 8.9, 3.8 Hz, 1H), 2.53 – 2.43 (m, 1H), 2.45 (s, 3H), 0.93 (d,  $J$  = 7.1 Hz, 3H), 0.83 (d,  $J$  = 6.9 Hz, 3H).  **$^{13}C\{^1H\}$  NMR** (101 MHz, Chloroform-*d*) 156.7, 155.7, 149.9, 138.3, 118.7, 111.3, 63.1, 59.0, 27.9, 24.4, 18.1, 14.6. **HRMS** (ESI)  $m/z$  calculated for  $[C_{12}H_{16}N_2O_2Na]$  ( $[M+Na^+]$ ) 243.1104, found 243.1097.

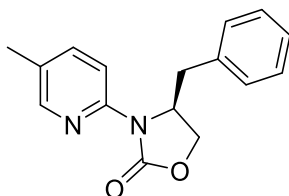

**(S)-4-Benzyl-3-(5-methylpyridin-2-yl)oxazolidin-2-one:** The title compound was prepared according to GP1 from 2-bromo-5-methylpyridine (585 mg, 3.4 mmol, 1.0 equiv.), (S)-4-benzyl-2-oxazolidinone (602 mg, 3.4 mmol, 1.0 equiv.), CuI (32.4 mg, 0.17 mmol, 5 mol%), 1,10-phenanthroline (61.3 mg, 0.34 mmol, 10 mol%) and  $K_2CO_3$  (608 mg, 4.4 mmol, 1.3 equiv.) in toluene (4 mL) at 140  $^{\circ}C$ . The product was isolated after column chromatography (eluent: *n*-pentane/EtOAc 4:1) as white solid (839 mg, 3.1 mmol, 91%).

**$^1H$  NMR** (400 MHz, Chloroform-*d*) 8.23 (d,  $J$  = 2.3 Hz, 1H), 8.09 (d,  $J$  = 8.5 Hz, 1H), 7.56 (dd,  $J$  = 8.5, 2.4 Hz, 1H), 7.35 – 7.30 (m, 2H), 7.29 – 7.20 (m, 3H), 5.09 (ddt,  $J$  = 9.2, 8.0, 3.4 Hz, 1H), 4.36 – 4.18 (m, 2H), 3.40 (dd,  $J$  = 13.4, 3.2 Hz, 1H), 2.83 (dd,  $J$  = 13.4, 9.3 Hz, 1H), 2.33 (s, 3H).  **$^{13}C\{^1H\}$  NMR** (101 MHz, Chloroform-*d*) 155.1, 148.4, 147.8, 138.8, 136.3, 129.6, 128.9, 128.7, 127.1, 113.6, 66.2, 56.1, 37.9, 17.9. **HRMS** (ESI)  $m/z$  calculated for  $[C_{16}H_{16}N_2O_2Na]$  ( $[M+Na^+]$ ) 291.1104, found 291.1099.

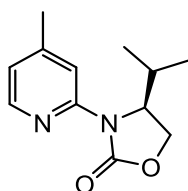

**(S)-4-Isopropyl-3-(4-methylpyridin-2-yl)oxazolidin-2-one:** The title compound was prepared according to GP1 from 2-bromo-4-methylpyridine (450  $\mu$ L, 4.0 mmol, 1.0 equiv.), (S)-4-isopropylloxazolidin-2-one (517 mg, 4.0 mmol, 1.0 equiv.), CuI (38.1 mg, 0.2 mmol, 5 mol%), 1,10-phenanthroline (72.0 mg, 0.4 mmol, 10 mol%) and  $K_2CO_3$  (719 mg, 5.2 mmol, 1.3 equiv.) in toluene (4 mL) at 140  $^{\circ}C$ . The product was isolated after column chromatography (eluent: *n*-pentane/EtOAc 6:1, later 4:1) as colorless oil (839 mg, 3.8 mmol, 95%).

$^1H$  NMR (400 MHz, Chloroform-*d*) 8.17 (d,  $J = 5.1$  Hz, 1H), 7.98 (s, 1H), 6.85 (dd,  $J = 5.1, 0.6$  Hz, 1H), 4.86 (dt,  $J = 8.8, 3.8$  Hz, 1H), 4.36 (t,  $J = 8.8$  Hz, 1H), 4.27 (dd,  $J = 8.9, 3.8$  Hz, 1H), 2.46 (heptd,  $J = 7.2, 3.9$  Hz, 1H), 2.36 (s, 3H), 0.92 (d,  $J = 7.1$  Hz, 3H), 0.83 (d,  $J = 6.9$  Hz, 3H).  $^{13}C\{^1H\}$  NMR (101 MHz, Chloroform-*d*) 155.6, 150.7, 149.6, 147.2, 120.8, 115.1, 63.0, 59.1, 27.8, 21.5, 18.1, 14.5. HRMS (ESI)  $m/z$  calculated for  $[C_{12}H_{16}N_2O_2Na]$  ( $[M+Na^+]$ ) 243.1104, found 243.1096.

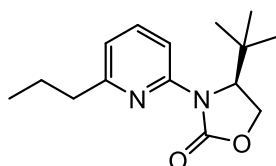

**(S)-4-(*tert*-Butyl)-3-(6-propylpyridin-2-yl)oxazolidin-2-one:** The title compound was prepared according to a modified version of GP1 from 2-allyl-6-bromopyridine (2.64 g, 13.3 mmol, 1.00 equiv.), (S)-4-*tert*-butyloxazolidin-2-one (2.0 g, 14.0 mmol, 1.05 equiv.), CuI (190.5 mg, 1.0 mmol, 7.5 mol%), *N,N'*-dimethylethylenediamine (212.0  $\mu$ L, 2.0 mmol, 15 mol%) and  $K_2CO_3$  (2.75 g, 26.6 mmol, 2.0 equiv.) in toluene (6 mL) at 140  $^{\circ}C$ . (S)-3-(6-allylpyridin-2-yl)-4-(*tert*-butyl)oxazolidin-2-one was isolated after column chromatography (eluent: *n*-pentane/EtOAc 6:1, later 4:1) as yellow solid (2.6 g). The compound was dissolved in EtOH (40 mL), Pd/C (200 mg) was added and the mixture was stirred under an atmosphere of hydrogen gas (10 bar) for 16 h. The desired product was obtained after recrystallization from *n*-hexanes / ethyl acetate as white solid (2.4 g, 9.2 mmol, 69%).

$^1H$  NMR (400 MHz, Chloroform-*d*) 7.73 (dd,  $J = 8.2, 0.9$  Hz, 1H), 7.61 (dd,  $J = 8.2, 7.4$  Hz, 1H), 6.88 (dd,  $J = 7.4, 0.9$  Hz, 1H), 5.04 (dd,  $J = 8.2, 2.5$  Hz, 1H), 4.44 – 4.33 (m, 2H), 2.74 – 2.59 (m, 2H), 1.82 – 1.64 (m, 2H), 0.94 (t,  $J = 7.4$  Hz, 3H), 0.86 (s, 9H).  $^{13}C\{^1H\}$  NMR (101 MHz, Chloroform-*d*) 160.3, 156.6, 151.1, 138.3, 119.1, 113.4, 65.2, 61.5, 40.1, 36.0, 26.0, 22.8, 14.0. HRMS (ESI)  $m/z$  calculated for  $[C_{15}H_{22}N_2O_2Na]$  ( $[M+Na^+]$ ) 300.1319, found 300.1315.

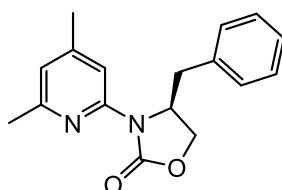

**(S)-4-Benzyl-3-(4,6-dimethylpyridin-2-yl)oxazolidin-2-one:** The title compound was prepared according to GP2 from 2-chloro-4,6-dimethylpyridine (636  $\mu$ L, 5.0 mmol, 1.0 equiv.),

(*S*)-4-benzyloxazolidin-2-one (1.06 g, 6.0 mmol, 1.2 equiv.), CuI (476 mg, 2.5 mmol, 50 mol%), *N,N*-dimethylethylenediamine (269  $\mu$ L, 2.5 mmol, 50 mol%) and K<sub>2</sub>CO<sub>3</sub> (1.38 g, 10.0 mmol, 2.0 equiv.) in toluene (5 mL) at 140 °C. The product was isolated after column chromatography (eluent: *n*-pentane/EtOAc 4:1) as white solid (1.23 g, 4.4 mmol, 87%).

**<sup>1</sup>H NMR** (400 MHz, Chloroform-*d*) 7.77 (s, 1H), 7.29 – 7.23 (m, 2H), 7.22 – 7.15 (m, 3H), 6.69 (s, 1H), 5.08 – 4.99 (m, 1H), 4.21 (t, *J* = 8.4 Hz, 1H), 4.14 (dd, *J* = 8.8, 3.3 Hz, 1H), 3.38 (dd, *J* = 13.3, 3.2 Hz, 1H), 2.70 (dd, *J* = 13.3, 9.5 Hz, 1H), 2.42 (s, 3H), 2.27 (s, 3H). **<sup>13</sup>C{<sup>1</sup>H} NMR** (101 MHz, Chloroform-*d*) 156.4, 155.0, 149.8, 136.7, 129.5, 128.9, 127.1, 119.9, 111.3, 66.3, 56.4, 38.1, 24.3, 21.4 (one carbon overlapping). **HRMS** (ESI) *m/z* calculated for [C<sub>17</sub>H<sub>18</sub>N<sub>2</sub>O<sub>2</sub>Na] ([M+Na<sup>+</sup>]) 305.1261, found 305.1256.

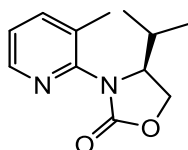

**(*S*)-4-Isopropyl-3-(3-methylpyridin-2-yl)oxazolidin-2-one:** The title compound was prepared according to GP1 from 2-bromo-3-methylpyridine (334  $\mu$ L, 3.0 mmol, 1.0 equiv.), (*S*)-4-isopropoxyloxazolidin-2-one (387 mg, 3.0 mmol, 1.0 equiv.), CuI (29.0 mg, 0.15 mmol, 5 mol%), 1,10-phenanthroline (54.0 mg, 0.3 mmol, 10 mol%) and K<sub>2</sub>CO<sub>3</sub> (539 mg, 3.9 mmol, 1.3 equiv.) in toluene (3 mL) at 140 °C. The product was isolated after column chromatography (eluent: *n*-pentane/EtOAc 4:1) as white solid (548 mg, 2.5 mmol, 83%).

**<sup>1</sup>H NMR** (400 MHz, Chloroform-*d*) 8.28 – 8.25 (m, 1H), 7.61 – 7.57 (m, 1H), 7.13 (dd, *J* = 7.6, 4.7 Hz, 1H), 4.89 (td, *J* = 8.8, 4.8 Hz, 1H), 4.48 (t, *J* = 8.8 Hz, 1H), 4.22 (t, *J* = 8.7 Hz, 1H), 2.37 (s, 3H), 1.96 (heptd, *J* = 6.9, 4.7 Hz, 1H), 0.83 (d, *J* = 0.9 Hz, 3H), 0.81 (d, *J* = 0.6 Hz, 3H). **<sup>13</sup>C{<sup>1</sup>H} NMR** (101 MHz, Chloroform-*d*) 156.3, 149.5, 145.9, 140.4, 130.5, 122.5, 64.6, 60.8, 28.9, 18.1, 18.1, 15.7. **HRMS** (ESI) *m/z* calculated for [C<sub>12</sub>H<sub>16</sub>N<sub>2</sub>O<sub>2</sub>Na] ([M+Na<sup>+</sup>]) 243.1104, found 243.1098.

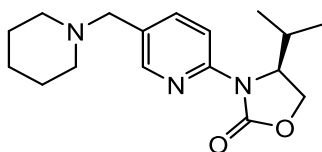

**(*S*)-4-Isopropyl-3-(5-(piperidin-1-ylmethyl)pyridin-2-yl)oxazolidin-2-one:** The title compound was prepared according to GP2 from 2-chloro-5-(piperidin-1-ylmethyl)pyridine<sup>[2]</sup> (3.16 g, 15.0 mmol, 1.0 equiv.), (*S*)-4-isopropoxyloxazolidin-2-one (1.97 g, 15.0 mmol, 1.0 equiv.), CuI (214 mg, 1.13 mmol, 7.5 mol%), 1,10-phenanthroline (240  $\mu$ L, 2.25 mmol, 15 mol%) and K<sub>2</sub>CO<sub>3</sub> (3.1 g, 30.0 mmol, 2.0 equiv.) in toluene (7 mL) at 130 °C. The product was isolated after column chromatography (eluent: *n*-pentane/EtOAc 2:1) as white solid (3.6 g, 11.9 mmol, 79%).

**<sup>1</sup>H NMR** (400 MHz, Chloroform-*d*) 8.21 (d, *J* = 2.3 Hz, 1H), 8.09 (dd, *J* = 8.5, 0.8 Hz, 1H), 7.68 (dd, *J* = 8.6, 2.4 Hz, 1H), 4.85 (dt, *J* = 8.9, 3.8 Hz, 1H), 4.40 – 4.25 (m, 2H), 3.43 (s, 2H), 2.56 – 2.44 (m, 1H),

2.41 – 2.31 (m, 4H), 1.60 – 1.52 (m, 4H), 1.47 – 1.39 (m, 2H), 0.93 (d,  $J = 7.1$  Hz, 3H), 0.83 (d,  $J = 6.9$  Hz, 3H).  $^{13}\text{C}\{^1\text{H}\}$  NMR (101 MHz, Chloroform-*d*) 155.6, 149.6, 148.0, 139.1, 129.7, 114.0, 63.0, 60.6, 59.1, 54.5, 27.7, 26.1, 24.4, 18.1, 14.4. **HRMS** (ESI)  $m/z$  calculated for  $[\text{C}_{17}\text{H}_{25}\text{N}_3\text{O}_2\text{Na}]$  ( $[\text{M}+\text{Na}^+]$ ) 326.1839, found 326.1835.

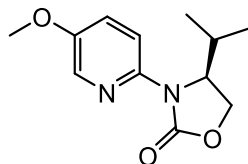

**(S)-4-Isopropyl-3-(5-methoxypyridin-2-yl)oxazolidin-2-one:** The title compound was prepared according to GP1 from 2-bromo-5-methoxypyridine (248  $\mu\text{L}$ , 2.0 mmol, 1.0 equiv.), (S)-4-isopropylloxazolidin-2-one (258 mg, 2.0 mmol, 1.0 equiv.), CuI (19.0 mg, 0.1 mmol, 5 mol%), 1,10-phenanthroline (36.0 mg, 0.2 mmol, 10 mol%) and  $\text{K}_2\text{CO}_3$  (359 mg, 2.6 mmol, 1.3 equiv.) in toluene (2 mL) at 140  $^\circ\text{C}$ . The product was isolated after column chromatography (eluent: *n*-pentane/EtOAc 4:1) as colorless oil (467 mg, 2.0 mmol, 99%).

$^1\text{H}$  NMR (400 MHz, Chloroform-*d*) 8.05 – 7.98 (m, 2H), 7.27 (dd,  $J = 9.0, 3.1$  Hz, 1H), 4.81 (dt,  $J = 8.9, 4.0$  Hz, 1H), 4.37 (t,  $J = 8.9$  Hz, 1H), 4.25 (dd,  $J = 8.9, 4.1$  Hz, 1H), 3.84 (s, 3H), 2.41 (heptd,  $J = 7.0, 3.7$  Hz, 1H), 0.91 (d,  $J = 7.0$  Hz, 3H), 0.82 (d,  $J = 6.9$  Hz, 3H).  $^{13}\text{C}\{^1\text{H}\}$  NMR (101 MHz, Chloroform-*d*) 155.8, 152.7, 144.1, 134.0, 123.6, 115.5, 63.0, 59.2, 56.0, 27.8, 18.0, 14.5. **HRMS** (ESI)  $m/z$  calculated for  $[\text{C}_{12}\text{H}_{16}\text{N}_2\text{O}_3\text{Na}]$  ( $[\text{M}+\text{Na}^+]$ ) 259.1053, found 259.1046.

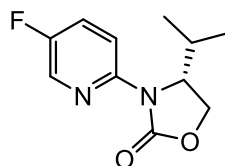

**(R)-3-(5-Fluoropyridin-2-yl)-4-isopropylloxazolidin-2-one:** The title compound was prepared according to GP1 from 2-bromo-5-fluoropyridine (889 mg, 5.0 mmol, 1.0 equiv.), (R)-4-isopropylloxazolidin-2-one (646 mg, 5.0 mmol, 1.0 equiv.), CuI (48 mg, 0.25 mmol, 5 mol%), 1,10-phenanthroline (90 mg, 0.5 mmol, 10 mol%) and  $\text{K}_2\text{CO}_3$  (898 mg, 6.5 mmol, 1.3 equiv.) in toluene (5 mL) at 140  $^\circ\text{C}$ . The product was isolated after column chromatography (eluent: *n*-pentane/EtOAc 9:1) as white solid (1.01 g, 4.5 mmol, 90%).

$^1\text{H}$  NMR (500 MHz, Chloroform-*d*) 8.19 – 8.14 (m, 2H), 7.46 – 7.41 (m, 1H), 4.81 (dt,  $J = 8.8, 3.8$  Hz, 1H), 4.37 (t,  $J = 8.9$  Hz, 1H), 4.27 (dd,  $J = 8.9, 3.9$  Hz, 1H), 2.45 (heptd,  $J = 7.0, 3.7$  Hz, 1H), 0.92 (d,  $J = 7.1$  Hz, 3H), 0.82 (d,  $J = 6.9$  Hz, 3H).  $^{13}\text{C}\{^1\text{H}\}$  NMR (126 MHz, Chloroform-*d*) 156.4 (d,  $J = 251.5$  Hz), 155.5, 146.7 (d,  $J = 2.3$  Hz), 135.0 (d,  $J = 25.3$  Hz), 125.3 (d,  $J = 19.8$  Hz), 115.4 (d,  $J = 4.3$  Hz), 63.0, 59.2, 27.7, 18.0, 14.4.  $^{19}\text{F}$ -NMR (470 MHz, Chloroform-*d*) -113.5 (dd,  $J = 7.7, 4.0$  Hz). **HRMS** (ESI)  $m/z$  calculated for  $[\text{C}_{11}\text{H}_{13}\text{N}_2\text{O}_2\text{FNa}]$  ( $[\text{M}+\text{Na}^+]$ ) 247.0853, found 247.0850.



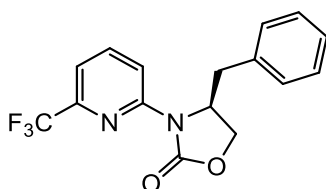

**(S)-4-Benzyl-3-(6-(trifluoromethyl)pyridin-2-yl)oxazolidin-2-one:** The title compound was prepared according to GP1 from 2-bromo-6-(trifluoromethyl)pyridine (457 mg, 2.0 mmol, 1.0 equiv.), (S)-4-benzyloxazolidin-2-one (354 mg, 2.0 mmol, 1.0 equiv.), CuI (19.0 mg, 0.1 mmol, 5 mol%), 1,10-phenanthroline (36.0 mg, 0.2 mmol, 10 mol%) and K<sub>2</sub>CO<sub>3</sub> (359 mg, 2.6 mmol, 1.3 equiv.) in toluene (2 mL) at 140 °C. The product was isolated after column chromatography (eluent: *n*-pentane/EtOAc 4:1) as colorless oil (443 mg, 1.4 mmol, 69%).

<sup>1</sup>H NMR (400 MHz, Chloroform-*d*) 8.47 (d, *J* = 8.6 Hz, 1H), 7.96 – 7.87 (m, 1H), 7.45 (d, *J* = 7.3 Hz, 1H), 7.38 – 7.32 (m, 2H), 7.31 – 7.24 (m, 3H), 5.07 (dddd, *J* = 9.9, 6.9, 4.0, 3.0 Hz, 1H), 4.36 – 4.27 (m, 2H), 3.51 (dd, *J* = 13.2, 3.1 Hz, 1H), 2.79 (dd, *J* = 13.2, 9.8 Hz, 1H). <sup>13</sup>C{<sup>1</sup>H} NMR (101 MHz, Chloroform-*d*) 154.7, 150.7, 146.3 (q, *J* = 35.3 Hz), 139.6, 136.1, 129.5, 129.1, 127.4, 121.4 (q, *J* = 274.2 Hz), 116.5, 115.9 – 115.2 (m), 66.7, 56.6, 37.9. <sup>19</sup>F{<sup>1</sup>H} NMR (376 MHz, Chloroform-*d*) –68.4. HRMS (ESI) *m/z* calculated for [C<sub>16</sub>H<sub>13</sub>N<sub>2</sub>O<sub>2</sub>F<sub>3</sub>Na] ([M+Na<sup>+</sup>]) 345.0821, found 345.0818.

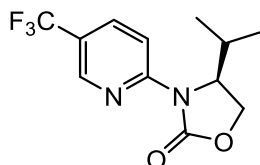

**(S)-4-Isopropyl-3-(5-(trifluoromethyl)pyridin-2-yl)oxazolidin-2-one:** The title compound was prepared according to GP1 from 2-bromo-5-(trifluoromethyl)pyridine (457 mg, 2.0 mmol, 1.0 equiv.), (S)-4-isopropoxyloxazolidin-2-one (258 mg, 2.0 mmol, 1.0 equiv.), CuI (19.0 mg, 0.1 mmol, 5 mol%), 1,10-phenanthroline (36.0 mg, 0.2 mmol, 10 mol%) and K<sub>2</sub>CO<sub>3</sub> (359 mg, 2.6 mmol, 1.3 equiv.) in toluene (2 mL) at 140 °C. The product was isolated after column chromatography (eluent: *n*-pentane/EtOAc 6:1) as yellow oil (464 mg, 1.7 mmol, 85%).

<sup>1</sup>H NMR (400 MHz, Chloroform-*d*) 8.59 – 8.57 (m, 1H), 8.37 (d, *J* = 8.9 Hz, 1H), 7.91 (dd, *J* = 8.9, 2.3 Hz, 1H), 4.87 (dt, *J* = 8.6, 3.5 Hz, 1H), 4.40 (t, *J* = 8.8 Hz, 1H), 4.33 (dd, *J* = 9.0, 3.5 Hz, 1H), 2.55 (heptd, *J* = 7.0, 3.7 Hz, 1H), 0.96 (d, *J* = 7.1 Hz, 3H), 0.85 (d, *J* = 6.9 Hz, 3H). <sup>13</sup>C{<sup>1</sup>H} NMR (101 MHz, Chloroform-*d*) 155.2, 153.3, 145.1 (q, *J* = 4.3 Hz), 135.3 (q, *J* = 3.3 Hz), 123.8 (q, *J* = 271.5 Hz), 122.0 (q, *J* = 33.3 Hz), 113.4, 63.2, 59.3, 27.7, 18.1, 14.4. <sup>19</sup>F{<sup>1</sup>H} NMR (376 MHz, Chloroform-*d*) –61.9. HRMS (ESI) *m/z* calculated for [C<sub>12</sub>H<sub>13</sub>N<sub>2</sub>O<sub>2</sub>F<sub>3</sub>Na] ([M+Na<sup>+</sup>]) 297.0821, found 297.0816.

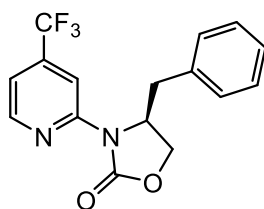

**(S)-4-Benzyl-3-(4-(trifluoromethyl)pyridin-2-yl)oxazolidin-2-one:** The title compound was prepared according to GP2 from 2-chloro-4-(trifluoromethyl)pyridine (386  $\mu$ L, 3.0 mmol, 1.0 equiv.), (S)-4-benzyl-2-oxazolidinone (638 mg, 3.6 mmol, 1.2 equiv.), CuI (286 mg, 1.5 mmol, 50 mol%), *N,N*-dimethylethylenediamine (161  $\mu$ L, 1.5 mmol, 50 mol%) and  $K_2CO_3$  (829 mg, 6.0 mmol, 2.0 equiv.) in toluene (3 mL) at 140  $^{\circ}C$ . The product was isolated after column chromatography (eluent: *n*-pentane/EtOAc 9:1) as white solid (171 mg, 0.53 mmol, 18%).

**$^1H$  NMR** (500 MHz, Chloroform-*d*) 8.57 (dd,  $J = 5.2, 0.7$  Hz, 1H), 8.55 – 8.54 (m, 1H), 7.34 (tt,  $J = 6.8, 1.0$  Hz, 2H), 7.30 – 7.27 (m, 2H), 7.25 – 7.22 (m, 2H), 5.11 (ddt,  $J = 9.5, 7.9, 3.3$  Hz, 1H), 4.36 – 4.26 (m, 2H), 3.45 (dd,  $J = 13.4, 3.4$  Hz, 1H), 2.83 (dd,  $J = 13.4, 9.5$  Hz, 1H).  **$^{13}C\{^1H\}$  NMR** (126 MHz, Chloroform-*d*) 154.7, 151.5, 149.0, 140.6 (q,  $J = 34.1$  Hz), 135.9, 129.5, 129.1, 127.4, 122.7 (d,  $J = 273.4$  Hz), 114.8 (q,  $J = 3.3$  Hz), 109.9 (q,  $J = 4.0$  Hz), 66.5, 56.3, 37.9.  **$^{19}F$ -NMR** (470 MHz, Chloroform-*d*) –64.8. **HRMS** (ESI)  $m/z$  calculated for  $[C_{16}H_{13}N_2O_3F_3Na]$  ( $[M+Na^+]$ ) 345.0821, found 345.0819.

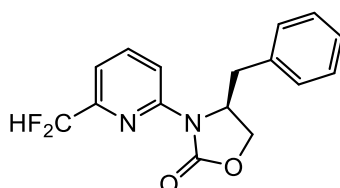

**(S)-4-Benzyl-3-(6-(difluoromethyl)pyridin-2-yl)oxazolidin-2-one:** The title compound was prepared according to GP1 from 2-bromo-6-(difluoromethyl)pyridine (184  $\mu$ L, 1.5 mmol, 1.0 equiv.), (S)-4-benzyl-2-oxazolidinone (266 mg, 1.5 mmol, 1.0 equiv.), CuI (14.0 mg, 0.075 mmol, 5 mol%), 1,10-phenanthroline (27.0 mg, 0.15 mmol, 10 mol%) and  $K_2CO_3$  (370 mg, 2.0 mmol, 1.3 equiv.) in toluene (2 mL) at 140  $^{\circ}C$ . The product was isolated after column chromatography (eluent: *n*-pentane/EtOAc 9:1) as colorless oil (449 mg, 1.48 mmol, 98%).

**$^1H$  NMR** (400 MHz, Chloroform-*d*) 8.37 (dd,  $J = 8.5, 1.0$  Hz, 1H), 7.88 (dd,  $J = 8.5, 7.5$  Hz, 1H), 7.39 (d,  $J = 7.5$  Hz, 1H), 7.36 – 7.31 (m, 2H), 7.30 – 7.25 (m, 1H), 7.25 – 7.21 (m, 2H), 6.59 (t,  $J = 55.6$  Hz, 1H), 5.09 (ddt,  $J = 9.5, 7.7, 3.3$  Hz, 1H), 4.42 – 4.23 (m, 2H), 3.46 (dd,  $J = 13.3, 3.2$  Hz, 1H), 2.82 (dd,  $J = 13.3, 9.5$  Hz, 1H).  **$^{13}C\{^1H\}$  NMR** (101 MHz, Chloroform-*d*) 154.8, 150.9 (t,  $J = 25.7$  Hz), 150.4, 139.5, 136.1, 129.5, 129.1, 127.3, 115.5 (t,  $J = 1.7$  Hz), 115.4 (t,  $J = 3.6$  Hz), 113.5 (t,  $J = 240.7$  Hz), 66.6, 56.4, 38.0.  **$^{19}F$ -NMR** (377 MHz, Chloroform-*d*) –116.5 (d,  $J = 57.4$  Hz). **HRMS** (ESI)  $m/z$  calculated for  $[C_{16}H_{14}N_2O_4F_2Na]$  ( $[M+Na^+]$ ) 327.0916, found 327.0912.

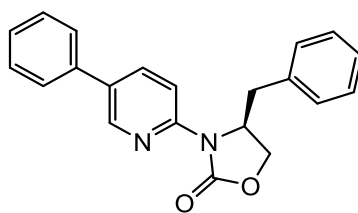

**(S)-4-Benzyl-3-(5-phenylpyridin-2-yl)oxazolidin-2-one:** The title compound was prepared according to GP3 from 2-bromo-5-phenylpyridine (468 mg, 2.0 mmol, 1.0 equiv.), (*S*)-4-benzyl-2-oxazolidinone (354 mg, 2.0 mmol, 1.0 equiv.), CuI (19.1 mg, 0.1 mmol, 5 mol%), 1,10-phenanthroline (36.0 mg, 0.2 mmol, 10 mol%) and K<sub>2</sub>CO<sub>3</sub> (359 mg, 2.6 mmol, 1.3 equiv.) in toluene (2 mL) at 140 °C. The product was isolated after column chromatography (pentane:EtOAc = 9:1) as white solid (651 mg, 1.97 mmol, 99%).

<sup>1</sup>H NMR (300 MHz, Chloroform-*d*) 8.65 (dd, *J* = 2.5, 0.8 Hz, 1H), 8.30 (dd, *J* = 8.7, 0.8 Hz, 1H), 7.96 (dd, *J* = 8.7, 2.5 Hz, 1H), 7.64 – 7.57 (m, 2H), 7.53 – 7.45 (m, 2H), 7.44 – 7.23 (m, 6H), 5.16 (ddt, *J* = 9.3, 7.9, 3.3 Hz, 1H), 4.44 – 4.22 (m, 2H), 3.49 (dd, *J* = 13.4, 3.3 Hz, 1H), 2.88 (dd, *J* = 13.4, 9.3 Hz, 1H). <sup>13</sup>C{<sup>1</sup>H} NMR (75 MHz, Chloroform-*d*) 155.0, 149.7, 146.0, 137.6, 136.7, 136.2, 132.4, 129.6, 129.2, 129.0, 128.0, 127.2, 127.0, 113.8, 66.4, 56.2, 38.0. HRMS (ESI) *m/z* calculated for [C<sub>21</sub>H<sub>18</sub>N<sub>2</sub>O<sub>2</sub>Na] ([M+Na<sup>+</sup>]) 353.1261, found 353.1261.

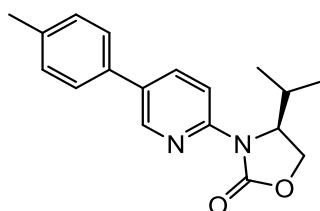

**(S)-4-Isopropyl-3-(5-(*p*-tolyl)pyridin-2-yl)oxazolidin-2-one:** The title compound was prepared according to GP3 from (*S*)-3-(5-chloropyridin-2-yl)-4-isopropyl-2-oxazolidinone (963 mg, 4.0 mmol, 1.0 equiv.), *p*-tolylboronic acid (653 mg, 4.8 mmol, 1.2 equiv.), tetrakis(triphenylphosphine)palladium (231 mg, 0.2 mmol, 5 mol%), and K<sub>2</sub>CO<sub>3</sub> (2.65 g, 19.2 mmol, 4.8 equiv.) in 1,4-dioxane (11 mL) and H<sub>2</sub>O (8 mL) at 110 °C. The product was isolated after column chromatography (eluent: *n*-pentane/EtOAc 12:1, later 9:1, 7:1) as white solid (277 mg, 0.9 mmol, 23%).

<sup>1</sup>H NMR (400 MHz, Chloroform-*d*) 8.54 (dd, *J* = 2.6, 0.8 Hz, 1H), 8.23 (dd, *J* = 8.7, 0.8 Hz, 1H), 7.91 (dd, *J* = 8.7, 2.5 Hz, 1H), 7.48 – 7.44 (m, 2H), 7.30 – 7.27 (m, 2H), 4.92 (dt, *J* = 8.8, 3.7 Hz, 1H), 4.41 (t, *J* = 8.8 Hz, 1H), 4.31 (dd, *J* = 8.9, 3.8 Hz, 1H), 2.59 – 2.51 (m, 1H), 2.41 (s, 3H), 0.97 (d, *J* = 7.1 Hz, 3H), 0.87 (d, *J* = 6.9 Hz, 3H). <sup>13</sup>C{<sup>1</sup>H} NMR (101 MHz, Chloroform-*d*) 155.6, 149.5, 145.6, 137.9, 136.5, 134.6, 132.5, 129.9, 126.8, 114.3, 63.1, 59.2, 27.8, 21.3, 18.1, 14.5. HRMS (ESI) *m/z* calculated for [C<sub>18</sub>H<sub>20</sub>N<sub>2</sub>O<sub>2</sub>Na] ([M+Na<sup>+</sup>]) 319.1417, found 319.1414.

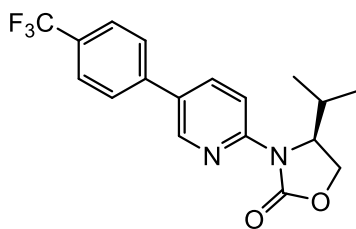

**(S)-4-isopropyl-3-(5-(4-(trifluoromethyl)phenyl)pyridine-2-yl)oxazolidin-2-one:** The title compound was prepared according to GP3 from (S)-3-(5-chloropyridin-2-yl)-4-isopropoxyloxazolidin-2-one (963 mg, 4.0 mmol, 1.0 equiv.), (4-(trifluoromethyl)phenyl)boronic acid (912 mg, 4.8 mmol, 1.2 equiv.), tetrakis(triphenylphosphin)palladium (231 mg, 0.2 mmol, 5 mol%), and K<sub>2</sub>CO<sub>3</sub> (2.65 g, 19.2 mmol, 4.8 equiv.) in 1,4-dioxane (11 mL) and H<sub>2</sub>O (8 mL) at 110 °C. The product was isolated after column chromatography (eluent: *n*-pentane/EtOAc 12:1, later 9:1, 7:1) as white solid (526 mg, 1.5 mmol, 38%).

**<sup>1</sup>H NMR** (400 MHz, Chloroform-*d*) 8.57 (dd, *J* = 2.6, 0.8 Hz, 1H), 8.31 (dd, *J* = 8.7, 0.8 Hz, 1H), 7.93 (dd, *J* = 8.7, 2.5 Hz, 1H), 7.75 – 7.64 (m, 4H), 4.91 (dt, *J* = 8.7, 3.7 Hz, 1H), 4.42 (t, *J* = 8.8 Hz, 1H), 4.33 (dd, *J* = 9.0, 3.7 Hz, 1H), 2.58 (heptd, *J* = 7.0, 3.7 Hz, 1H), 0.98 (d, *J* = 7.0 Hz, 3H), 0.88 (d, *J* = 6.9 Hz, 3H). **<sup>13</sup>C{<sup>1</sup>H} NMR** (101 MHz, Chloroform-*d*) 155.4, 150.4, 145.8, 141.0 (d, *J* = 1.4 Hz), 136.6, 130.8, 129.9 (q, *J* = 32.6 Hz), 127.1, 126.1 (q, *J* = 3.8 Hz), 124.1 (q, *J* = 272.0 Hz), 114.1, 63.0, 59.1, 27.7, 18.0, 14.3. **<sup>19</sup>F{<sup>1</sup>H} NMR** (376 MHz, Chloroform-*d*) –62.5. **HRMS** (ESI) *m/z* calculated for [C<sub>18</sub>H<sub>17</sub>N<sub>2</sub>O<sub>2</sub>F<sub>3</sub>Na] ([M+Na<sup>+</sup>]) 373.1134, found 373.1131.

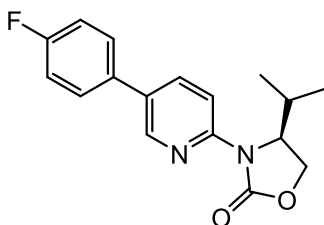

**(S)-3-(5-(4-Fluorophenyl)pyridin-2-yl)-4-isopropoxyloxazolidin-2-one:** The title compound was prepared according to GP3 from (S)-3-(5-chloropyridin-2-yl)-4-isopropoxyloxazolidin-2-one (963 mg, 4.0 mmol, 1.0 equiv.), (4-fluorophenyl)boronic acid (672 mg, 4.8 mmol, 1.2 equiv.), tetrakis(triphenylphosphin)palladium (231 mg, 0.2 mmol, 5 mol%), and K<sub>2</sub>CO<sub>3</sub> (2.65 g, 19.2 mmol, 4.8 equiv.) in 1,4-dioxane (11 mL) and H<sub>2</sub>O (8 mL) at 110 °C. The reaction time was extended to 72 h. The product was isolated after column chromatography (eluent: *n*-pentane/EtOAc 9:1, later 4:1, 3:1) as white solid (629 mg, 2.1 mmol, 52%).

**<sup>1</sup>H NMR** (400 MHz, Chloroform-*d*) 8.49 (dd, *J* = 2.5, 0.9 Hz, 1H), 8.24 (dd, *J* = 8.8, 0.9 Hz, 1H), 7.86 (dd, *J* = 8.7, 2.5 Hz, 1H), 7.55 – 7.47 (m, 2H), 7.19 – 7.11 (m, 2H), 4.90 (dt, *J* = 8.7, 3.7 Hz, 1H), 4.40 (t, *J* = 8.8 Hz, 1H), 4.31 (dd, *J* = 8.9, 3.8 Hz, 1H), 2.55 (heptd, *J* = 6.9, 3.7 Hz, 1H), 0.96 (d, *J* = 7.1 Hz, 3H), 0.86 (d, *J* = 7.0 Hz, 3H). **<sup>13</sup>C{<sup>1</sup>H} NMR** (101 MHz, Chloroform-*d*) 162.8 (d, *J* = 247.4 Hz), 155.5, 149.8, 145.6, 136.4, 133.7 (d, *J* = 3.3 Hz), 131.5, 128.5 (d, *J* = 8.1 Hz), 116.1 (d, *J* = 21.6 Hz), 114.2, 63.1,

59.2, 27.8, 18.1, 14.4.  $^{19}\text{F}\{^1\text{H}\}$  NMR (376 MHz, Chloroform-*d*) -114.6. HRMS (ESI) *m/z* calculated for  $[\text{C}_{17}\text{H}_{17}\text{N}_2\text{O}_2\text{FNa}]$  ( $[\text{M}+\text{Na}^+]$ ) 323.1166, found 323.1162.

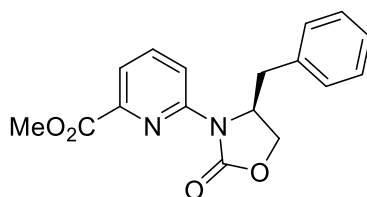

**Methyl (S)-6-(4-benzyl-2-oxooxazolidin-3-yl)picolinate:** The title compound was prepared according to GP1 from methyl 6-bromopicolinate (648 mg, 3.0 mmol, 1.0 equiv.), (S)-4-benzyl-2-oxazolidinone (532 mg, 3.0 mmol, 1.0 equiv.), CuI (29.0 mg, 0.15 mmol, 5 mol%), 1,10-phenanthroline (54.0 mg, 0.3 mmol, 10 mol%) and  $\text{K}_2\text{CO}_3$  (539 mg, 2.6 mmol, 1.3 equiv.) in toluene (3 mL) at 140 °C. The product was isolated after column chromatography (eluent: *n*-pentane/EtOAc 9:1, later 4:1) as white solid (853 mg, 2.7 mmol, 90%).

$^1\text{H}$  NMR (599 MHz, Chloroform-*d*) 8.46 – 8.42 (m, 1H), 7.88 (dd,  $J = 4.7, 0.9$  Hz, 2H), 7.38 – 7.33 (m, 4H), 7.29 – 7.26 (m, 1H), 5.13 (ddt,  $J = 9.8, 7.6, 3.2$  Hz, 1H), 4.37 – 4.27 (m, 2H), 4.03 (s, 2H), 3.57 (dd,  $J = 13.1, 3.0$  Hz, 1H), 2.78 (dd,  $J = 13.1, 9.8$  Hz, 1H).  $^{13}\text{C}\{^1\text{H}\}$  NMR (151 MHz, Chloroform-*d*) 165.5, 154.9, 150.4, 146.0, 139.2, 136.5, 129.6, 129.0, 127.2, 120.6, 117.2, 66.8, 56.9, 52.8, 38.0. HRMS (ESI) *m/z* calculated for  $[\text{C}_{17}\text{H}_{16}\text{N}_2\text{O}_4\text{Na}]$  ( $[\text{M}+\text{Na}^+]$ ) 335.1002, found 335.0998.

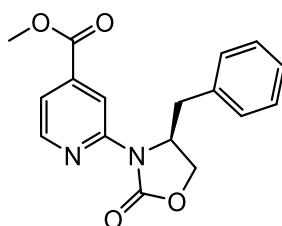

**Methyl (S)-2-(4-benzyl-2-oxooxazolidin-3-yl)isonicotinate:** The title compound was prepared according to GP1 from methyl 2-bromoisonicotinate (648 mg, 3.0 mmol, 1.0 equiv.), (S)-4-benzyl-2-oxazolidinone (531 mg, 3.0 mmol, 1.0 equiv.), CuI (29.0 mg, 0.15 mmol, 5 mol%), 1,10-phenanthroline (54.0 mg, 0.3 mmol, 10 mol%) and  $\text{K}_2\text{CO}_3$  (539 mg, 2.6 mmol, 1.3 equiv.) in toluene (3 mL) at 140 °C. The product was isolated after column chromatography (eluent: *n*-pentane/EtOAc 2:1) as colorless oil (948 mg, 3.0 mmol, 99%).

$^1\text{H}$  NMR (400 MHz, Chloroform-*d*) 8.81 – 8.76 (m, 1H), 8.56 (dd,  $J = 5.1, 0.9$  Hz, 1H), 7.66 (dd,  $J = 5.1, 1.4$  Hz, 1H), 7.39 – 7.33 (m, 2H), 7.33 – 7.22 (m, 3H), 5.21 – 5.08 (m, 1H), 4.39 – 4.33 (m, 1H), 4.29 (dd,  $J = 8.9, 3.3$  Hz, 1H), 3.99 (s, 3H), 3.45 (dd,  $J = 13.4, 3.3$  Hz, 1H), 2.86 (dd,  $J = 13.4, 9.3$  Hz, 1H).  $^{13}\text{C}\{^1\text{H}\}$  NMR (101 MHz, Chloroform-*d*) 165.6, 154.8, 151.4, 148.6, 139.8, 136.0, 129.5, 129.0, 127.3, 118.6, 113.5, 66.4, 56.3, 52.9, 37.9. HRMS (ESI) *m/z* calculated for  $[\text{C}_{17}\text{H}_{16}\text{N}_2\text{O}_4\text{Na}]$  ( $[\text{M}+\text{Na}^+]$ ) 335.1002, found 335.0997.

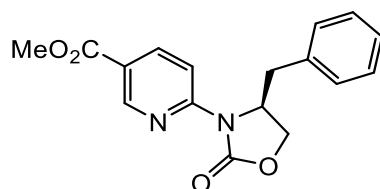

**Methyl (S)-6-(4-benzyl-2-oxooxazolidin-3-yl)picolinate:** The title compound was prepared according to GP1 from methyl 6-bromonicotinate (648 mg, 3.0 mmol, 1.0 equiv), (S)-4-benzyl-2-oxazolidinone (532 mg, 3.0 mmol, 1.0 equiv.), CuI (29.0 mg, 0.15 mmol, 5 mol%), 1,10-phenanthroline (54.0 mg, 0.3 mmol, 10 mol%) and K<sub>2</sub>CO<sub>3</sub> (539 mg, 2.6 mmol, 1.3 equiv.) in toluene (3 mL) at 140 °C. The product was isolated after column chromatography (eluent: *n*-pentane/EtOAc 9:1, later 4:1) as white solid (853 mg, 2.7 mmol, 90%).

**<sup>1</sup>H NMR** (599 MHz, Chloroform-*d*) 8.46 – 8.42 (m, 1H), 7.88 (dd, *J* = 4.7, 0.9 Hz, 2H), 7.38 – 7.33 (m, 4H), 7.29 – 7.26 (m, 1H), 5.13 (ddt, *J* = 9.8, 7.6, 3.2 Hz, 1H), 4.37 – 4.27 (m, 2H), 4.03 (s, 2H), 3.57 (dd, *J* = 13.1, 3.0 Hz, 1H), 2.78 (dd, *J* = 13.1, 9.8 Hz, 1H). **<sup>13</sup>C{<sup>1</sup>H} NMR** (151 MHz, Chloroform-*d*) 165.5, 154.9, 150.4, 146.0, 139.2, 136.5, 129.6, 129.0, 127.2, 120.6, 117.2, 66.8, 56.9, 52.8, 38.0. **HRMS** (ESI) *m/z* calculated for [C<sub>17</sub>H<sub>16</sub>N<sub>2</sub>O<sub>4</sub>Na] ([M+Na<sup>+</sup>]) 335.1002, found 335.0998.

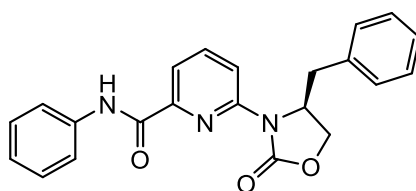

**(S)-2-(4-Benzyl-2-oxooxazolidin-3-yl)-N-phenylisonicotinamide:** The title compound was prepared according to GP1 from 6-bromo-N-phenylpicolinamide (554 mg, 2.0 mmol, 1.0 equiv.), (S)-4-benzyl-2-oxazolidinone (354 mg, 2.0 mmol, 1.0 equiv.), CuI (19.1 mg, 0.1 mmol, 5 mol%), 1,10-phenanthroline (36.0 mg, 0.2 mmol, 10 mol%) and K<sub>2</sub>CO<sub>3</sub> (359 mg, 2.6 mmol, 1.3 equiv.) in toluene (2 mL) at 140 °C. The product was isolated after column chromatography (eluent: *n*-pentane/EtOAc 2:1) as white solid (595 mg, 1.6 mmol, 80%).

**<sup>1</sup>H NMR** (300 MHz, Chloroform-*d*) 9.44 (s, 1H), 8.32 (dd, *J* = 8.4, 1.0 Hz, 1H), 7.93 (dd, *J* = 7.5, 1.0 Hz, 1H), 7.82 (dd, *J* = 8.4, 7.5 Hz, 1H), 7.62 – 7.54 (m, 2H), 7.33 – 7.00 (m, 8H), 5.11 (ddt, *J* = 9.3, 7.9, 3.3 Hz, 1H), 4.41 – 4.31 (m, 1H), 4.24 (dd, *J* = 8.9, 3.3 Hz, 1H), 3.34 (dd, *J* = 13.8, 3.5 Hz, 1H), 2.85 (dd, *J* = 13.8, 9.2 Hz, 1H). **<sup>13</sup>C{<sup>1</sup>H} NMR** (75 MHz, Chloroform-*d*) 161.5, 154.6, 149.1, 147.8, 140.1, 137.5, 135.6, 129.2, 129.2, 129.0, 127.5, 124.6, 119.6, 118.1, 117.0, 66.7, 55.9, 38.2. **HRMS** (ESI) *m/z* calculated for [C<sub>22</sub>H<sub>19</sub>N<sub>3</sub>O<sub>4</sub>Na] ([M+Na<sup>+</sup>]) 396.1319, found 396.1319.

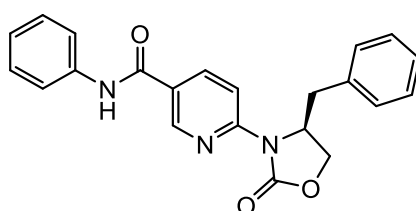

**(S)-6-(4-Benzyl-2-oxooxazolidin-3-yl)-N-phenylnicotinamide:** The title compound was prepared according to GP2 from 6-chloro-*N*-phenylnicotinamide (465 mg, 2.0 mmol, 1.0 equiv.), (*S*)-4-benzyl-2-oxazolidinone (425 mg, 2.4 mmol, 1.2 equiv.), CuI (77 mg, 0.4 mmol, 20 mol%), *N,N*-dimethylethylenediamine (43  $\mu$ l, 0.4 mmol, 20 mol%) and K<sub>2</sub>CO<sub>3</sub> (564 mg, 4.0 mmol, 2.0 equiv.) in toluene (2 mL) at 140 °C. The product was isolated after column chromatography (eluent: *n*-pentane/EtOAc 2:1) as white solid (489 mg, 1.3 mmol, 66%).

<sup>1</sup>H NMR (400 MHz, Chloroform-*d*) 8.97 (dd, *J* = 2.5, 0.8 Hz, 1H), 8.35 (dd, *J* = 8.8, 0.8 Hz, 1H), 8.22 (dd, *J* = 8.8, 2.5 Hz, 1H), 7.94 (s, 1H), 7.70 – 7.65 (m, 2H), 7.42 – 7.16 (m, 8H), 5.14 (ddt, *J* = 9.2, 7.8, 3.2 Hz, 1H), 4.38 – 4.26 (m, 2H), 3.44 (dd, *J* = 13.5, 3.2 Hz, 1H), 2.87 (dd, *J* = 13.4, 9.3 Hz, 1H). <sup>13</sup>C{<sup>1</sup>H} NMR (101 MHz, Chloroform-*d*) 163.6, 154.8, 152.8, 147.6, 137.8, 137.0, 135.9, 129.6, 129.3, 129.1, 127.4, 126.0, 125.0, 120.5, 113.0, 66.5, 56.3, 37.9. HRMS (ESI) *m/z* calculated for [C<sub>22</sub>H<sub>19</sub>N<sub>3</sub>O<sub>4</sub>Na] ([M+Na<sup>+</sup>]) 396.1319, found 396.1318.

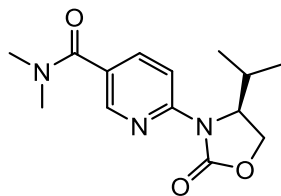

**(S)-6-(4-Isopropyl-2-oxooxazolidin-3-yl)-*N,N*-dimethylnicotinamide:** The title compound was prepared according to GP2 from 6-chloro-*N,N*-dimethylnicotinamide (3.03 g, 16.4 mmol, 1.00 equiv.), (*S*)-4-isopropyl-2-oxazolidinone (2.23 g, 17.2 mmol, 1.05 equiv.), CuI (235 mg, 1.23 mmol, 7.5 mol%), *N,N*-dimethylethylenediamine (262  $\mu$ l, 2.46 mmol, 15 mol%) and K<sub>2</sub>CO<sub>3</sub> (3.39 mg, 32.85 mmol, 2.0 equiv.) in toluene (8 mL) at 140 °C. The product was isolated after column chromatography (eluent: *n*-pentane/EtOAc 1:1) as white solid (2.40 g, 8.65 mmol, 53%).

<sup>1</sup>H NMR (400 MHz, Chloroform-*d*) 8.43 (dd, *J* = 2.4, 0.9 Hz, 1H), 8.22 (dd, *J* = 8.7, 0.8 Hz, 1H), 7.77 (dd, *J* = 8.7, 2.4 Hz, 1H), 4.86 (dt, *J* = 8.7, 3.7 Hz, 1H), 4.43 – 4.27 (m, 2H), 3.11 (s, 3H), 3.04 (s, 3H), 2.58 – 2.45 (m, 1H), 0.94 (d, *J* = 7.1 Hz, 3H), 0.82 (d, *J* = 6.9 Hz, 3H). <sup>13</sup>C{<sup>1</sup>H} NMR (101 MHz, Chloroform-*d*) 169.0, 155.4, 151.3, 146.8, 137.3, 127.4, 113.4, 63.1, 59.1, 39.8, 35.7, 27.6, 18.1, 14.3. HRMS (ESI) *m/z* calculated for [C<sub>14</sub>H<sub>19</sub>N<sub>3</sub>O<sub>3</sub>Na] ([M+Na<sup>+</sup>]) 300.1319, found 300.1315.

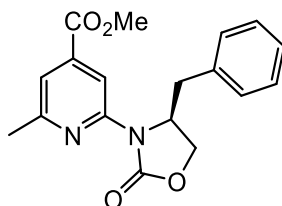

**Methyl (S)-2-(4-benzyl-2-oxooxazolidin-3-yl)-6-methylisonicotinate:** The title compound was prepared according to GP2 from methyl 2-chloro-6-methylisonicotinate (557 mg,

3.0 mmol, 1.0 equiv.), (*S*)-4-benzyl-2-oxazolidinone (3.6 mmol, 638 mg, 1.2 equiv.) CuI (286 mg, 1.5 mmol, 50 mol%), *N,N*-dimethylethylenediamine (161  $\mu$ l, 1.5 mmol, 50 mol%) and K<sub>2</sub>CO<sub>3</sub> (829 mg, 6.0 mmol, 2.0 equiv.) in toluene (3 mL) at 140 °C. The product was isolated after column chromatography (eluent: *n*-pentane/EtOAc 9:1) as white solid (360 mg, 1.1 mmol, 37%).

**<sup>1</sup>H NMR** (400 MHz, Chloroform-*d*) 8.54 (d, *J* = 0.6 Hz, 1H), 7.49 (d, *J* = 0.6 Hz, 1H), 7.36 – 7.31 (m, 2H), 7.29 – 7.22 (m, 3H), 5.10 (ddt, *J* = 9.5, 7.8, 3.2 Hz, 1H), 4.38 – 4.22 (m, 2H), 3.95 (s, 3H), 3.45 (dd, *J* = 13.3, 3.3 Hz, 1H), 2.80 (dd, *J* = 13.3, 9.4 Hz, 1H), 2.61 (s, 3H). **<sup>13</sup>C{<sup>1</sup>H} NMR** (101 MHz, Chloroform-*d*) 165.9, 157.9, 154.8, 150.6, 140.1, 136.3, 129.5, 129.0, 127.3, 117.9, 110.3, 66.4, 56.5, 52.8, 38.0, 24.5. **HRMS** (ESI) *m/z* calculated for [C<sub>18</sub>H<sub>18</sub>N<sub>2</sub>O<sub>4</sub>Na] ([M+Na<sup>+</sup>]) 349.1159, found 349.1156.

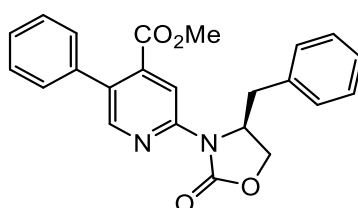

**Methyl (*S*)-2-(4-benzyl-2-oxooxazolidin-3-yl)-5-phenylisonicotinate:** The title compound was prepared according to GP2 from methyl 2-chloro-5-phenylisonicotinate (495 mg, 2.0 mmol, 1.0 equiv.), (*S*)-4-benzyl-2-oxazolidinone (2.4 mmol, 425 mg, 1.2 equiv.), CuI (190 mg, 1.0 mmol, 50 mol%), *N,N*-dimethylethylenediamine (108  $\mu$ l, 1.0 mmol, 50 mol%) and K<sub>2</sub>CO<sub>3</sub> (553 mg, 4.0 mmol, 2.0 equiv.) in toluene (2 mL) at 140 °C. The product was isolated after column chromatography (eluent: *n*-pentane/EtOAc 4:1) as colorless oil (469 mg, 1.2 mmol, 60%).

**<sup>1</sup>H NMR** (400 MHz, Chloroform-*d*) 8.56 (d, *J* = 0.8 Hz, 1H), 8.47 (d, *J* = 0.8 Hz, 1H), 7.49 – 7.40 (m, 3H), 7.38 – 7.30 (m, 4H), 7.31 – 7.23 (m, 3H), 5.14 (ddt, *J* = 9.4, 7.9, 3.3 Hz, 1H), 4.41 – 4.25 (m, 2H), 3.75 (s, 3H), 3.46 (dd, *J* = 13.4, 3.3 Hz, 1H), 2.86 (dd, *J* = 13.4, 9.3 Hz, 1H). **<sup>13</sup>C{<sup>1</sup>H} NMR** (101 MHz, Chloroform-*d*) 167.4, 154.8, 150.0, 149.2, 140.5, 136.9, 136.0, 131.7, 129.6, 129.0, 128.7, 128.6, 128.1, 127.3, 112.6, 66.4, 56.2, 52.8, 37.9. **HRMS** (ESI) *m/z* calculated for [C<sub>23</sub>H<sub>20</sub>N<sub>2</sub>O<sub>4</sub>Na] ([M+Na<sup>+</sup>]) 411.1315, found 411.1319.



### 3. Investigation of Reaction Parameters

#### General Procedure for the hydrogenation of oxazolidinone-substituted pyridines:

A 4 ml glass vial (screw-cap) equipped with a stir bar was charged with 5 wt% Pd/C (32 mg, 0.015 mmol, 10 mol%) and solid oxazolidinone-substituted pyridine (0.15 mmol, 1.0 equiv). THF (0.5 mL) and H<sub>2</sub>O (0.5 mL) were added (1 mL / 0.15 M in total) followed by the addition of liquid oxazolidinone-substituted pyridine (0.15 mmol, 1.0 equiv) and concentrated aqueous HCl (30  $\mu$ l, 2.4 equiv). The glass vial was placed in a 150 ml stainless steel autoclave under air. The autoclave was pressurized and depressurized four times with hydrogen gas before the final hydrogen pressure was set to 50 bar. If not otherwise stated, the reaction mixture was stirred at 40 °C for 24 h. After the autoclave was carefully depressurized, Na<sub>2</sub>CO<sub>3</sub> (64 mg, 4.0 equiv) was added and the mixture was filtered over celite using CH<sub>2</sub>Cl<sub>2</sub>. Mesitylene (20.9  $\mu$ l) was added as internal standard and the product yield was determined using GC-FID. Enantiomeric excess of the product was determined using HPLC-UV analysis.

Table S1: Investigation of reaction parameters.<sup>a</sup>

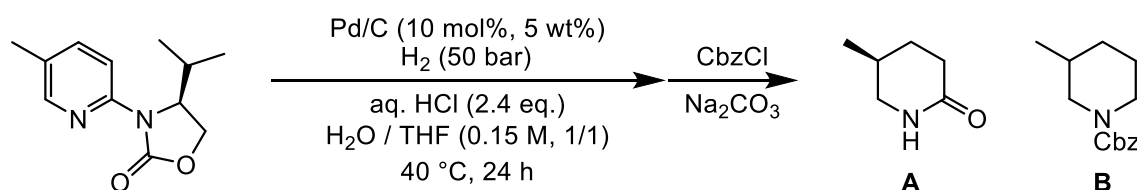

| entry | deviation                      | conversion | yield A          | yield B |
|-------|--------------------------------|------------|------------------|---------|
| 1     | none                           | >95%       | 91%              | <5%     |
| 2     | H <sub>2</sub> O/MeOH (1/1)    | >95%       | 79%              | 5%      |
| 3     | H <sub>2</sub> O/MeCN (1/1)    | 36%        | <5%              | <5%     |
| 4     | H <sub>2</sub> O/dioxane (1/1) | >95%       | 29%              | 6%      |
| 5     | H <sub>2</sub> O only          | >95%       | 84%              | 17%     |
| 6     | THF only <sup>b</sup>          | 41%        | 19% <sup>b</sup> | <5%     |
| 7     | formic acid instead HCl        | >95%       | <5%              | >95%    |

<sup>a</sup> After the autoclave was carefully depressurized, Na<sub>2</sub>CO<sub>3</sub> (95 mg, 6.0 equiv) and CbzCl (63  $\mu$ l, 3.0 equiv) were added, the mixture was stirred for 1 h at room temperature and filtered over celite using CH<sub>2</sub>Cl<sub>2</sub>. Mesitylene (20.9  $\mu$ l) was added as internal standard and the product yield was determined using GC-FID.<sup>b</sup>H<sub>2</sub>O is still present in the reaction mixture. Hydrochloric acid is added as aqueous solution and the Pd/C catalyst contains small amounts of water.

Table S2: Investigation of reaction parameters.

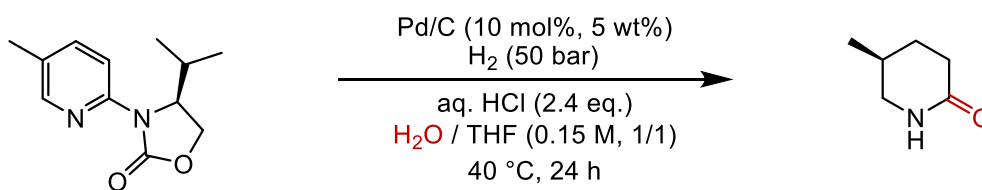

| entry | deviation                                 | yield | e.r. |
|-------|-------------------------------------------|-------|------|
| 1     | none                                      | 91%   | 97:3 |
| 2     | Pd/C (10 wt%)                             | 57%   | 96:4 |
| 3     | Pd/Rh/C (4.5 wt%, 0.5 wt%)                | 85%   | 96:4 |
| 4     | Pd/Al <sub>2</sub> O <sub>3</sub> (5 wt%) | 65%   | 95:5 |
| 5     | Pd/SiO <sub>2</sub>                       | 82%   | 94:6 |
| 6     | Pd(OH) <sub>2</sub> /C (20 wt%)           | 92%   | 96:4 |
| 7     | PtO <sub>2</sub>                          | 0%    | n.d. |
| 8     | Ru/C (5 wt%)                              | 19%   | n.d. |
| 9     | Rh/C (5 wt%)                              | 19%   | 97:3 |
| 10    | (S)-4-benzyloxazolidin-2-one              | 90%   | 98:2 |
| 11    | (S)-4-phenyloxazolidin-2-one              | 79%   | 95:5 |
| 12    | (4S,5R)-5-methyl-4-phenyloxazolidin-2-one | 88%   | 96:4 |
| 13    | $p = 25 \text{ bar}$                      | 92%   | 95:5 |

## 4. Reaction-Condition-Based Sensitivity Assessment

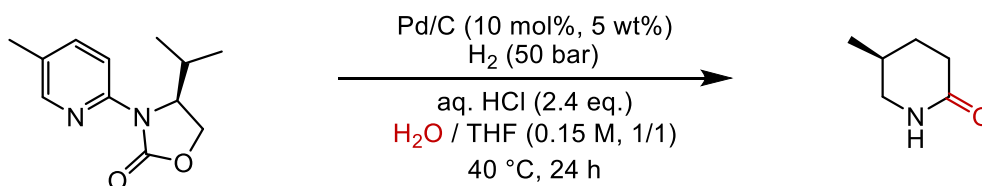

Following a procedure recently developed by our group,<sup>[3]</sup> a reaction-condition-based sensitivity screen was conducted. Key reaction parameters were varied in a systematic manner and the reaction results were compared to the standard reaction conditions. Table S3 gives an overview of the experimental results.

**Preparation of the stock solution:** (S)-4-Isopropyl-3-(5-methylpyridin-2-yl)oxazolidin-2-one (991 mg, 4.5 mmol, 1.0 equiv.) was dissolved in THF (13.5 ml, 0.33 M).

**Standard reaction conditions:**  $n = 0.30$  mmol,  $c = 0.15$  M,  $V = 2$  mL,  $T = 40$  °C,  $p(\text{H}_2) = 50$  bar.

**Standard reaction procedure:** A 4 ml glass vial (screw-cap) equipped with a stir bar was charged with 5 wt% Pd/C (64 mg, 0.03 mmol, 10 mol%), stock solution (0.9 ml), THF (0.1 ml), H<sub>2</sub>O (1.0 ml, total concentration  $c = 0.15$  M, total volume  $V = 2$  mL) and concentrated aqueous HCl (60  $\mu$ l, 2.4 equiv.). The glass vial was placed in a 150 ml stainless steel autoclave under air. The autoclave was pressurized and depressurized four times with hydrogen gas before the final hydrogen pressure was set to 50 bar. The reaction mixture was stirred at 40 °C for 24 h. After the autoclave was carefully depressurized, Na<sub>2</sub>CO<sub>3</sub> (212 mg, 4.0 equiv) was added and the mixture was filtered over celite using CH<sub>2</sub>Cl<sub>2</sub>. Mesitylene (20.9  $\mu$ l) was added as internal standard and the product yield was determined using GC-FID. Enantiomeric excess of the product was determined using HPLC-UV analysis.

**Big scale conditions:**  $n = 8.05$  mmol,  $c = 0.15$  M,  $V = 54$  mL, air atmosphere,  $T = 40$  °C,  $p(\text{H}_2) = 50$  bar. (S)-4-Isopropyl-3-(6-propylpyridin-2-yl)oxazolidin-2-one was used. The reaction outcome was compared to the synthesis of compound 4.

**Analysis:** By systematic variation we determined the influence of the reaction parameters of concentration, temperature, hydrogen pressure and oxygen content on the reaction outcome. Interestingly, small changes in these reaction parameters show only minor effects on the reaction yield. It is worth mentioning that the reaction shows minimal deviation when tap water is used as solvent instead of demineralized water.

Table S3: Investigation of the reaction-condition-based sensitivity.

| entry | experiment           | deviation                             | yield | yield dev. | e.r. | e.r. dev. |
|-------|----------------------|---------------------------------------|-------|------------|------|-----------|
| 1     | standard             | none                                  | 91%   | -          | 97:3 | -         |
| 2     | high <i>c</i>        | no extra THF, 1.0 ml H <sub>2</sub> O | 99%   | +9%        | 97:3 | ±0%       |
| 3     | low <i>c</i>         | +0.1 ml THF, +0.1 ml H <sub>2</sub> O | 85%   | -7%        | 98:2 | +1%       |
| 4     | tap H <sub>2</sub> O | 1.0 ml tap H <sub>2</sub> O           | 99%   | +9%        | 97:3 | ±0%       |
| 5     | low O <sub>2</sub>   | degassed solvent, setup under Argon   | 98%   | +8%        | 97:3 | ±0%       |
| 6     | high O <sub>2</sub>  | autoclave was not flushing            | 87%   | -4%        | 97:3 | ±0%       |
| 7     | low <i>T</i>         | <i>T</i> = 30 °C                      | 92%   | +1%        | 98:2 | +1%       |
| 8     | high <i>T</i>        | <i>T</i> = 50 °C                      | 96%   | +5%        | 97:3 | ±0%       |
| 9     | low <i>p</i>         | <i>p</i> = 40 bar                     | 99%   | +9%        | 97:3 | ±0%       |
| 10    | high <i>p</i>        | <i>p</i> = 60 bar                     | 97%   | +7%        | 97:3 | ±0%       |
| 11    | big scale            | <i>n</i> (substrate) = 8.05 mmol      | 78%*  | -7%        | 97:3 | -4%       |

\* (*S*)-4-Isopropyl-3-(6-propylpyridin-2-yl)oxazolidin-2-one was used and the reaction outcome was compared to the synthesis of compound 4.

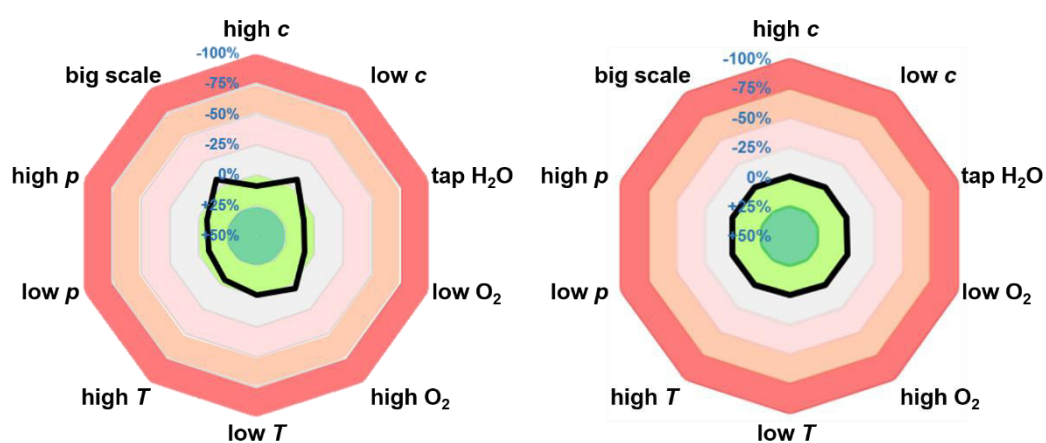

Figure S1: Radar diagrams of the reaction-condition-based sensitivity assessment for reaction yield (left-hand side) and enantiomeric excess (right-hand side).

## 5. Catalytic Hydrogenation Reactions

### General Procedure for the hydrogenation of oxazolidinone-substituted pyridines:

A 4 ml glass vial (screw-cap) equipped with a stir bar was charged with 5 wt% Pd/C (64 mg, 0.03 mmol, 10 mol%) and solid oxazolidinone-substituted pyridine (0.3 mmol, 1.0 equiv.). THF (1 mL) and H<sub>2</sub>O (1 mL) were added (2 mL / 0.15 M in total) followed by the addition of liquid oxazolidinone-substituted pyridine (0.3 mmol, 1.0 equiv.) and concentrated aqueous HCl (60  $\mu$ l, 2.4 equiv.). The glass vial was placed in a 150 ml stainless steel autoclave under air. The autoclave was pressurized and depressurized four times with hydrogen gas before the final hydrogen pressure was set to 50 bar. If not otherwise stated, the reaction mixture was stirred at 40 °C for 24 h. After the autoclave was carefully depressurized, Na<sub>2</sub>CO<sub>3</sub> (127 mg, 4.0 equiv) was added and the mixture was filtered over celite using CH<sub>2</sub>Cl<sub>2</sub>. The solvent was removed *in vacuo* and the product was purified using column chromatography on silica gel. The diastereoselectivities were determined by GC-MS analysis of the basified reaction mixture. Enantiomeric excess of the product was determined after column chromatography using HPLC-UV or GC-FID analysis. The racemic products were prepared by hydrogenation of pyridines with unsubstituted oxazolidinone.

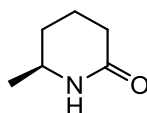

**(S)-6-Methylpiperidin-2-one:** The title compound was prepared following the General Procedure using (*S*)-4-isopropyl-3-(6-methylpyridin-2-yl)oxazolidin-2-one (66 mg, 0.30 mmol, 1.0 equiv.). The product was isolated after column chromatography (eluent: CH<sub>2</sub>Cl<sub>2</sub>, later CH<sub>2</sub>Cl<sub>2</sub>/MeOH 99:1, 98:2, 97:3) as white solid (30 mg, 0.27 mmol, 89%, 98:2 e.r.). The enantiomeric ratio of the product was determined after purification using HPLC Daicel CHIRALPAK IA-3, *n*-hexane:2-propanol = 88:12, flow rate = 1 mL/min,  $\lambda$  = 210 nm, retention time: 9.0 min (minor), 9.3 min (major).

**<sup>1</sup>H NMR** (400 MHz, Chloroform-*d*) 6.66 (s, 1H), 3.54 – 3.41 (m, 1H), 2.40 – 2.16 (m, 2H), 1.92 – 1.80 (m, 2H), 1.74 – 1.58 (m, 1H), 1.36 – 1.24 (m, 1H), 1.16 (d, *J* = 6.4 Hz, 3H). **<sup>13</sup>C{<sup>1</sup>H} NMR** (101 MHz, Chloroform-*d*) 172.6, 48.8, 31.1, 30.5, 22.8, 19.9. **HRMS** (ESI) *m/z* calculated for [C<sub>6</sub>H<sub>11</sub>NONa] ([M+Na<sup>+</sup>]) 136.0733, found 136.0730.

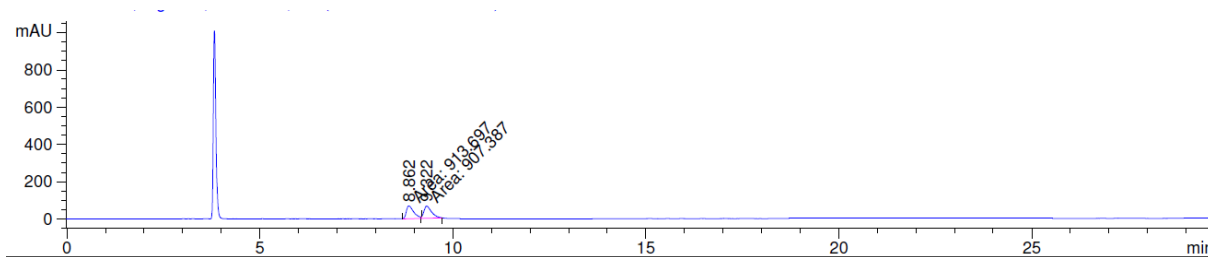

| Peak # | RetTime [min] | Type | Width [min] | Area [mAU*s] | Height [mAU] | Area %  |
|--------|---------------|------|-------------|--------------|--------------|---------|
| 1      | 8.862         | MM   | 0.2213      | 913.69733    | 68.81384     | 50.1733 |
| 2      | 9.322         | MM   | 0.2299      | 907.38702    | 65.77692     | 49.8267 |

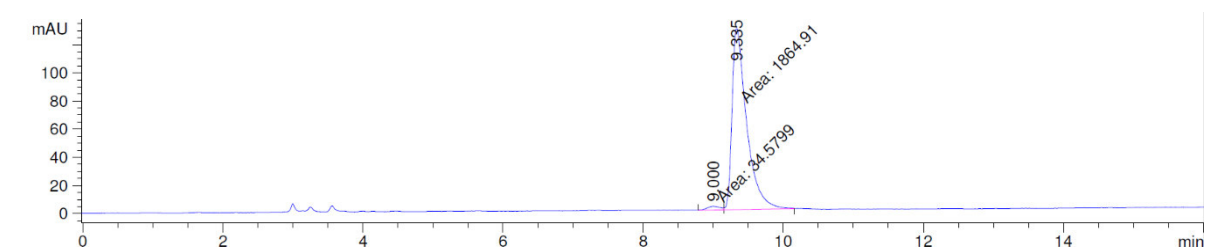

| Peak # | RetTime [min] | Type | Width [min] | Area [mAU*s] | Height [mAU] | Area %  |
|--------|---------------|------|-------------|--------------|--------------|---------|
| 1      | 9.000         | MF   | 0.2104      | 34.57987     | 2.73868      | 1.8205  |
| 2      | 9.335         | FM   | 0.2415      | 1864.90796   | 128.68031    | 98.1795 |

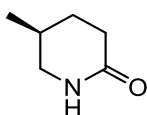

**(S)-5-Methylpiperidin-2-one:** The title compound was prepared following the General Procedure using (*S*)-4-isopropyl-3-(5-methylpyridin-2-yl)oxazolidin-2-one (66 mg, 0.30 mmol, 1.0 equiv.). The product was isolated after column chromatography (eluent: CH<sub>2</sub>Cl<sub>2</sub>, later CH<sub>2</sub>Cl<sub>2</sub>/MeOH 99:1, 98:2, 97:3) as colorless liquid (31 mg, 0.27 mmol, 90%, 98:2 e.r.). The enantiomeric ratio of the product was determined after purification using HPLC Daicel CHIRALPAK IA-3, *n*-hexane:2-propanol = 97:3, flow rate = 1 mL/min, λ = 210 nm, retention time: 39.7 min (major), 44.1 min (minor).

<sup>1</sup>H NMR (400 MHz, Chloroform-*d*) 6.40 (s, 1H), 3.33 – 3.23 (m, 1H), 2.96 – 2.84 (m, 1H), 2.47 – 2.26 (m, 2H), 1.98 – 1.78 (m, 2H), 1.54 – 1.39 (m, 1H), 1.00 (d, *J* = 6.6 Hz, 3H). <sup>13</sup>C{<sup>1</sup>H} NMR (101 MHz, Chloroform-*d*) 172.5, 49.3, 30.9, 29.2, 28.3, 18.5. HRMS (ESI) *m/z* calculated for [C<sub>6</sub>H<sub>11</sub>NONa] ([M+Na<sup>+</sup>]) 136.0733, found 136.0732.

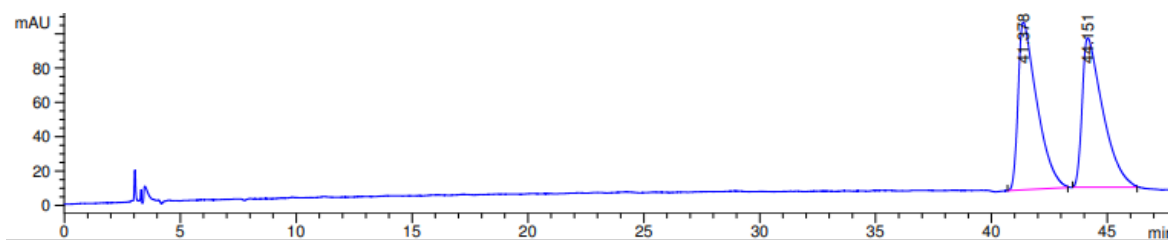

| Peak # | RetTime [min] | Type | Width [min] | Area [mAU*s] | Height [mAU] | Area %  |
|--------|---------------|------|-------------|--------------|--------------|---------|
| 1      | 41.378        | BB   | 0.7286      | 5521.03076   | 97.80560     | 50.5098 |
| 2      | 44.151        | BB   | 0.7318      | 5409.58691   | 87.07893     | 49.4902 |

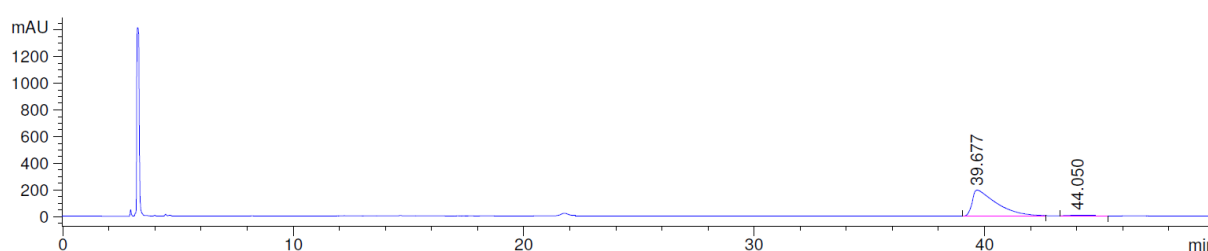

| Peak # | RetTime [min] | Type | Width [min] | Area [mAU*s] | Height [mAU] | Area %  |
|--------|---------------|------|-------------|--------------|--------------|---------|
| 1      | 39.677        | BB   | 0.9066      | 1.39387e4    | 193.22797    | 98.3977 |
| 2      | 44.050        | BB   | 0.6088      | 226.97058    | 4.39307      | 1.6023  |

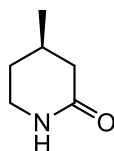

**(R)-4-Methylpiperidin-2-one:** The title compound was prepared following the General Procedure using (*S*)-4-isopropyl-3-(4-methylpyridin-2-yl)oxazolidin-2-one (66 mg, 0.30 mmol, 1.0 equiv.). The product was isolated after column chromatography (eluent: CH<sub>2</sub>Cl<sub>2</sub>, later CH<sub>2</sub>Cl<sub>2</sub>/MeOH 99:1, 98:2, 97:3) as white solid (30 mg, 0.26 mmol, 87%, 95:5 e.r.). The enantiomeric ratio of the product was determined after purification using gas chromatography (HYDRODEX β-6TBDM column, 25 m, 0.25 mm ID; carrier gas: H<sub>2</sub>; injection temperature 230 °C; oven temperature 50 °C, heating rate: 5 °C/min to 80 °C, then 0.5 °C/min to 220 °C).

<sup>1</sup>H NMR (400 MHz, Chloroform-*d*) 6.28 (s, 1H), 3.39 – 3.25 (m, 2H), 2.50 – 2.37 (m, 1H), 2.00 – 1.89 (m, 2H), 1.86 – 1.77 (m, 1H), 1.48 – 1.35 (m, 1H), 1.02 (d, *J* = 6.2 Hz, 3H). <sup>13</sup>C{<sup>1</sup>H} NMR (101 MHz, Chloroform-*d*) 172.6, 41.4, 39.8, 30.2, 27.7, 21.2. HRMS (ESI) *m/z* calculated for [C<sub>6</sub>H<sub>11</sub>NONa] ([M+Na<sup>+</sup>]) 136.0733, found 136.0731.

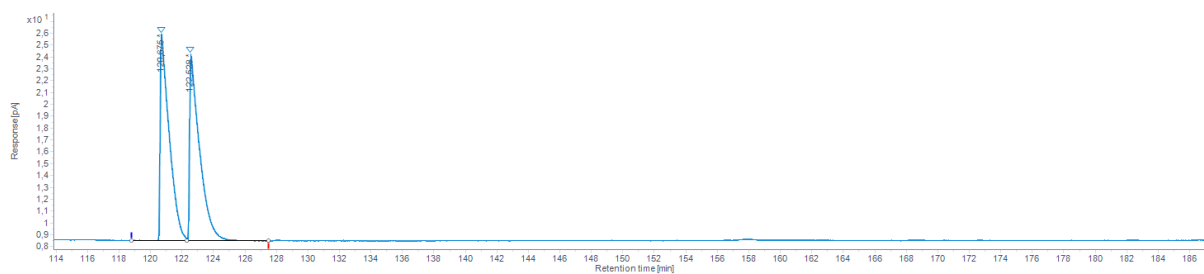

| # | Name | Signal description | RT (min) | Area    | Area%  | Height | Height% | Amount | Concentration | Start time (min) | End time (min) |
|---|------|--------------------|----------|---------|--------|--------|---------|--------|---------------|------------------|----------------|
| 1 |      | FID1A              | 120,675  | 686,749 | 49,943 | 17,382 | 52,46   |        |               | 118,775          | 122,313        |
| 2 |      | FID1A              | 122,528  | 688,317 | 50,057 | 15,750 | 47,54   |        |               | 122,313          | 127,472        |

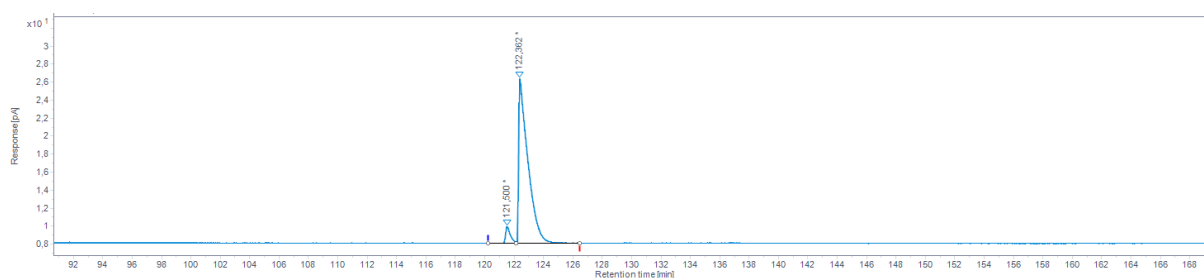

| # | Name | Signal description | RT (min) | Area    | Area%  | Height | Height% | Amount | Concentration | Start time (min) | End time (min) |
|---|------|--------------------|----------|---------|--------|--------|---------|--------|---------------|------------------|----------------|
| 1 |      | FID1A              | 121,500  | 39,752  | 4,799  | 1,844  | 9,17    |        |               | 120,250          | 122,158        |
| 2 |      | FID1A              | 122,362  | 788,583 | 95,201 | 18,269 | 90,83   |        |               | 122,158          | 126,448        |

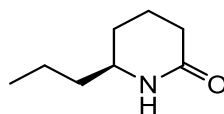

**(S)-6-Propylpiperidin-2-one:** The title compound was prepared following the General Procedure using (S)-4-(*tert*-butyl)-3-(6-propylpyridin-2-yl)oxazolidin-2-one (79 mg, 0.30 mmol, 1.0 equiv.) The product was isolated after column chromatography (eluent: CH<sub>2</sub>Cl<sub>2</sub>, later CH<sub>2</sub>Cl<sub>2</sub>/MeOH 99:1, 98:2, 97:3) as white solid (32 mg, 0.25 mmol, 84%, 99:1 e.r.). The enantiomeric ratio of the product was determined after purification using HPLC Daicel CHIRALPAK IA-3, *n*-hexane:2-propanol = 98:2, flow rate = 1 mL/min, λ = 210 nm, retention time: 52.3 min (minor), 57.3 min (major).

<sup>1</sup>H NMR (400 MHz, Chloroform-*d*) 5.93 (s, 1H), 3.40 – 3.28 (m, 1H), 2.46 – 2.32 (m, 1H), 2.32 – 2.21 (m, 1H), 1.95 – 1.83 (m, 2H), 1.75 – 1.60 (m, 1H), 1.49 – 1.27 (m, 5H), 0.93 (t, *J* = 7.2 Hz, 3H). <sup>13</sup>C{<sup>1</sup>H} NMR (101 MHz, Chloroform-*d*) 172.4, 53.1, 39.3, 31.5, 28.6, 20.0, 18.6, 14.0. HRMS (ESI) *m/z* calculated for [C<sub>8</sub>H<sub>15</sub>NONa] ([M+Na<sup>+</sup>]) 164.1046, found 164.1042.



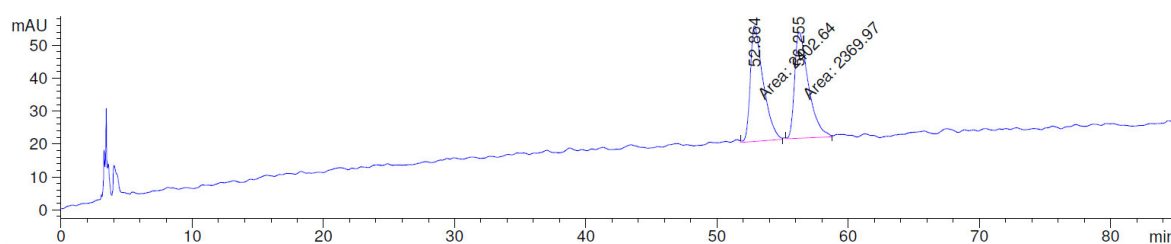

| Peak # | RetTime [min] | Type | Width [min] | Area [mAU*s] | Height [mAU] | Area %  |
|--------|---------------|------|-------------|--------------|--------------|---------|
| 1      | 52.864        | MM   | 1.1407      | 2402.63818   | 35.10623     | 50.3423 |
| 2      | 56.255        | MM   | 1.2262      | 2369.96851   | 32.21357     | 49.6577 |

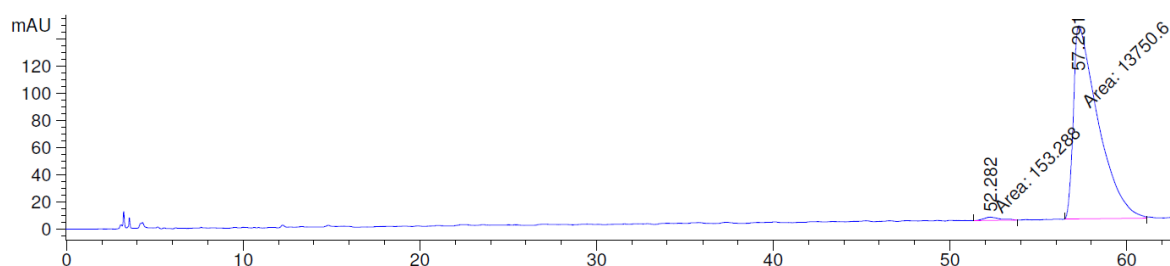

| Peak # | RetTime [min] | Type | Width [min] | Area [mAU*s] | Height [mAU] | Area %  |
|--------|---------------|------|-------------|--------------|--------------|---------|
| 1      | 52.282        | MM   | 1.0781      | 153.28813    | 2.36983      | 1.1025  |
| 2      | 57.291        | MM   | 1.6157      | 1.37506e4    | 141.84796    | 98.8975 |

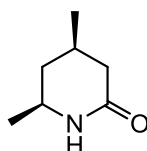

**(4R,6S)-4,6-Dimethylpiperidin-2-one:** The title compound was prepared following the General Procedure using (S)-4-benzyl-3-(4,6-dimethylpyridin-2-yl)oxazolidin-2-one (85 mg, 0.30 mmol, 1.0 equiv.) The product was isolated after column chromatography (eluent: CH<sub>2</sub>Cl<sub>2</sub>, later CH<sub>2</sub>Cl<sub>2</sub>/MeOH 99:1, 98:2, 97:3) as white solid (25 mg, 0.20 mmol, 66%, 98:2 e.r., >95:5 d.r.). The enantiomeric ratio of the product was determined after purification using gas chromatography (HYDRODEX β-6TBDM column, 25 m, 0.25 mm ID; carrier gas: H<sub>2</sub>; injection temperature 230 °C; oven temperature 50 °C, heating rate: 5 °C/min to 100 °C, then 0.5 °C/min to 150 °C, and 5 °C to 220 °C).

**<sup>1</sup>H NMR** (400 MHz, Chloroform-*d*) 6.21 (s, 1H), 3.48 (tt, *J* = 10.4, 6.3 Hz, 1H), 2.47 – 2.33 (m, 1H), 1.98 – 1.78 (m, 3H), 1.16 (d, *J* = 6.3 Hz, 3H), 1.07 – 0.96 (m, 1H), 0.99 (d, *J* = 6.1 Hz, 3H). **<sup>13</sup>C{<sup>1</sup>H} NMR** (101 MHz, Chloroform-*d*) 172.5, 48.8, 39.7, 27.9, 22.9, 21.6. **HRMS** (ESI) *m/z* calculated for [C<sub>7</sub>H<sub>13</sub>NONa] ([M+Na<sup>+</sup>]) 150.0900, found 150.0889.

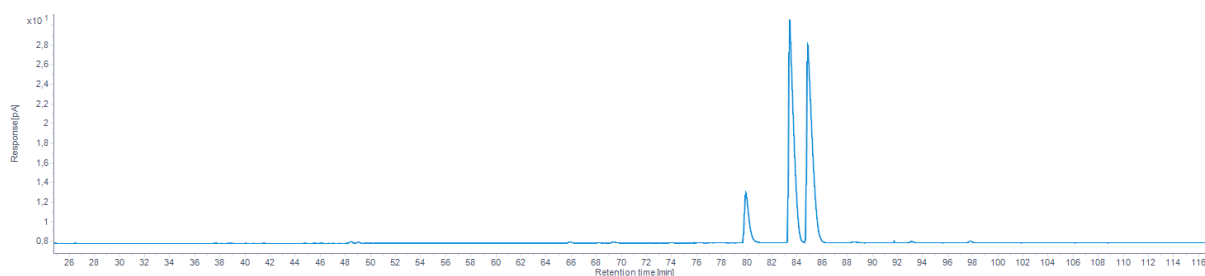

| # | Name | Signal description | RT (min) | Area    | Area%  | Height | Height% | Amount | Concentration | Start time (min) | End time (min) |
|---|------|--------------------|----------|---------|--------|--------|---------|--------|---------------|------------------|----------------|
| 1 |      | FID1A              | 83,372   | 613,566 | 50,086 | 22,781 | 52,86   |        |               | 83,036           | 84,558         |
| 2 |      | FID1A              | 84,817   | 611,449 | 49,914 | 20,317 | 47,14   |        |               | 84,558           | 86,607         |

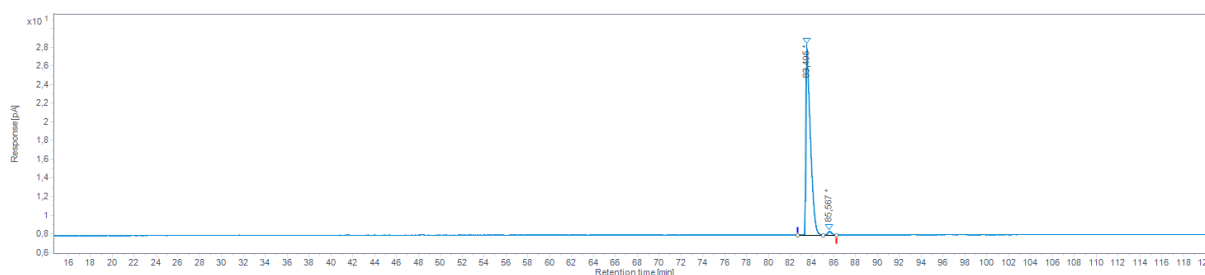

| # | Name | Signal description | RT (min) | Area    | Area%  | Height | Height% | Amount | Concentration | Start time (min) | End time (min) |
|---|------|--------------------|----------|---------|--------|--------|---------|--------|---------------|------------------|----------------|
| 1 |      | FID1A              | 83,495   | 572,553 | 98,304 | 20,437 | 98,11   |        |               | 82,642           | 84,983         |
| 2 |      | FID1A              | 85,567   | 9,876   | 1,696  | 0,394  | 1,89    |        |               | 84,983           | 86,191         |

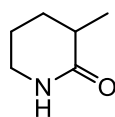

**3-Methylpiperidin-2-one:** The title compound was prepared following the General Procedure using (*S*)-4-isopropyl-3-(3-methylpyridin-2-yl)oxazolidin-2-one (66 mg, 0.30 mmol, 1.0 equiv.). The product was isolated after column chromatography (eluent: CH<sub>2</sub>Cl<sub>2</sub>, later CH<sub>2</sub>Cl<sub>2</sub>/MeOH 99:1, 98:2, 97:3) as colorless liquid (14 mg, 0.12 mmol, 40%, 62:38 e.r.). The enantiomeric ratio of the product was determined after purification using HPLC Daicel CHIRALPAK IA-3, *n*-hexane:2-propanol = 97:3, flow rate = 1 mL/min, λ = 210 nm, retention time: 30.5 min (major), 33.7 min (minor). Due to problems in the preparation of a racemic reference sample only the HPLC trace of the product is given. The diminished enantiomeric ratio of the product might be caused by steric repulsion of the pyridine and oxazolidinone substituents. Therefore, the formation of a stable conformer upon protonation is hampered if the pyridine 3-position is substituted (see page S51–S52 for further details).

**<sup>1</sup>H NMR** (400 MHz, Chloroform-*d*) 5.98 (s, 1H), 3.33 – 3.27 (m, 2H), 2.44 – 2.32 (m, 1H), 2.02 – 1.92 (m, 1H), 1.91 – 1.81 (m, 1H), 1.80 – 1.68 (m, 1H), 1.55 – 1.44 (m, 1H), 1.24 (d, *J* = 7.2 Hz, 3H). **<sup>13</sup>C{<sup>1</sup>H} NMR** (101 MHz, Chloroform-*d*) 175.8, 42.9, 36.2, 29.4, 21.6, 17.6. **HRMS** (ESI) *m/z* calculated for [C<sub>6</sub>H<sub>11</sub>NONa] ([M+Na<sup>+</sup>]) 136.0733, found 136.0732.

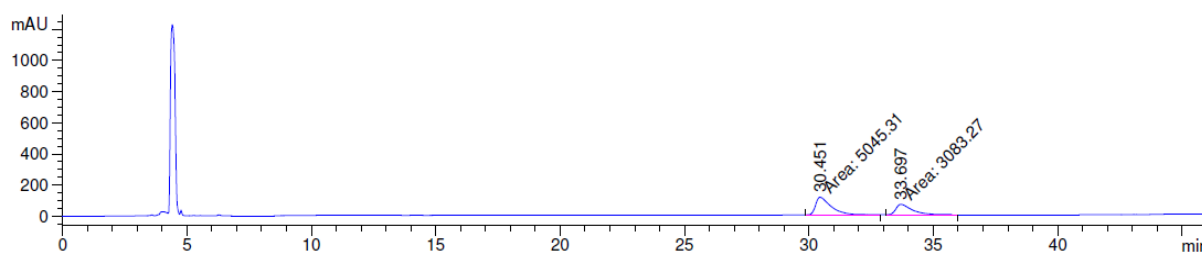

| Peak # | RetTime [min] | Type | Width [min] | Area [mAU*s] | Height [mAU] | Area %  |
|--------|---------------|------|-------------|--------------|--------------|---------|
| 1      | 30.451        | MM   | 0.7362      | 5045.30859   | 114.22527    | 62.0687 |
| 2      | 33.697        | MM   | 0.7634      | 3083.27295   | 67.31745     | 37.9313 |

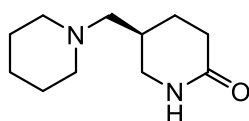

**(S)-5-(Piperidin-1-ylmethyl)piperidin-2-one:** The title compound was prepared following the General Procedure using (S)-4-isopropyl-3-(5-(piperidin-1-ylmethyl)pyridin-2-yl)oxazolidin-2-one (91 mg, 0.30 mmol, 1.0 equiv.) The product was isolated after column chromatography (eluent: CH<sub>2</sub>Cl<sub>2</sub>, later CH<sub>2</sub>Cl<sub>2</sub>/MeOH 95:5, 90:10, 80:20) as off-white solid (38 mg, 0.19 mmol, 65%, 97:3 e.r.). The enantiomeric ratio of the product was determined after purification using HPLC Daicel CHIRALPAK AD-H, *n*-hexane:2-propanol = 90:10, flow rate = 1 mL/min, λ = 210 nm, retention time: 12.3 min (major), 16.4 min (minor).

**<sup>1</sup>H NMR** (400 MHz, Chloroform-*d*) 6.18 (s, 1H), 3.48 – 3.38 (m, 1H), 3.05 – 2.92 (m, 1H), 2.51 – 2.21 (m, 8H), 2.12 – 1.98 (m, 1H), 1.94 – 1.85 (m, 1H), 1.65 – 1.38 (m, 7H). **<sup>13</sup>C{<sup>1</sup>H}-NMR (101 MHz, CDCl<sub>3</sub>):** 172.5, 62.1, 55.2, 46.6, 30.8, 30.6, 25.9, 25.7, 24.4. **HRMS** (ESI) *m/z* calculated for [C<sub>11</sub>H<sub>10</sub>N<sub>2</sub>ONa] ([M+Na<sup>+</sup>]) 219.1479, found 219.1466.

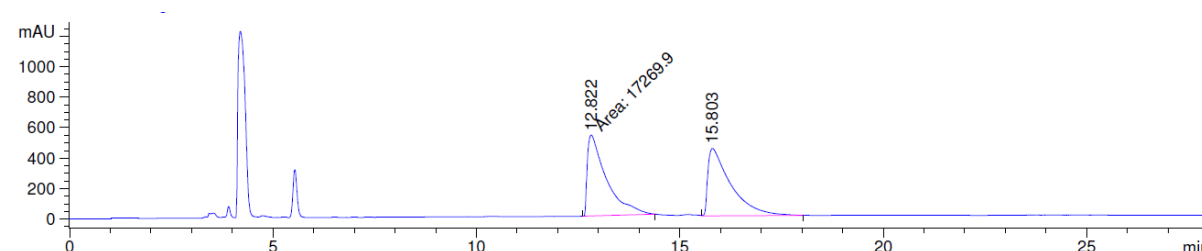

| Peak # | RetTime [min] | Type | Width [min] | Area [mAU*s] | Height [mAU] | Area %  |
|--------|---------------|------|-------------|--------------|--------------|---------|
| 1      | 12.822        | MM   | 0.5403      | 1.72699e4    | 532.73193    | 50.0875 |
| 2      | 15.803        | VB   | 0.5221      | 1.72096e4    | 442.18750    | 49.9125 |

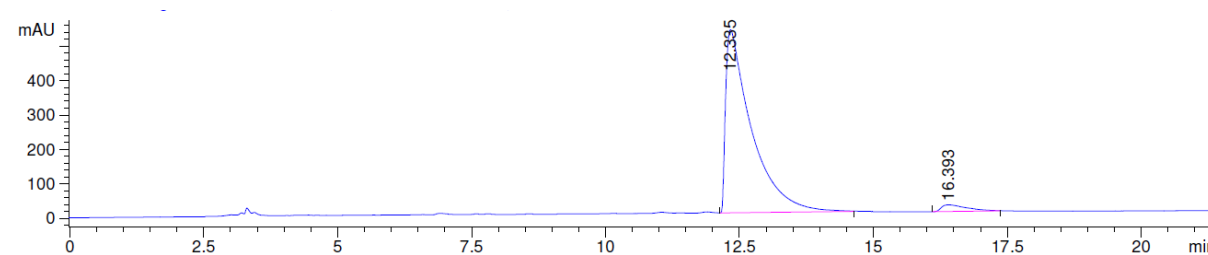

| Peak # | RetTime [min] | Type | Width [min] | Area [mAU*s] | Height [mAU] | Area %  |
|--------|---------------|------|-------------|--------------|--------------|---------|
| 1      | 12.335        | VB   | 0.4482      | 1.78498e4    | 532.32013    | 96.5402 |
| 2      | 16.393        | BB   | 0.3895      | 639.69379    | 19.51378     | 3.4598  |

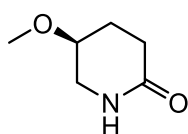

**(S)-5-Methoxypiperidin-2-one:** The title compound was prepared following the General Procedure using (S)-4-benzyl-3-(5-methoxypyridin-2-yl)oxazolidin-2-one (71 mg, 0.30 mmol, 1.0 equiv.) The product was isolated after column chromatography (eluent: CH<sub>2</sub>Cl<sub>2</sub>, later CH<sub>2</sub>Cl<sub>2</sub>/MeOH 99:1, 98:2, 97:3) as colorless liquid (32 mg, 0.30 mmol, 99%, 95:5 e.r.). The enantiomeric ratio of the product was determined after purification using HPLC Daicel CHIRALPAK IA-3, *n*-hexane:2-propanol = 97:3, flow rate = 1 mL/min, λ = 210 nm, retention time: 86.0 min (minor), 97.4 min (major).

**<sup>1</sup>H NMR** (400 MHz, Chloroform-*d*) 7.01 (s, 1H), 3.57 (ddd, *J* = 6.7, 5.5, 3.6 Hz, 1H), 3.43 – 3.25 (m, 1H), 3.33 (s, 3H), 2.46 (ddd, *J* = 17.7, 9.3, 6.4 Hz, 1H), 2.26 (dt, *J* = 17.8, 6.0 Hz, 1H), 2.03 – 1.82 (m, 2H). **<sup>13</sup>C{<sup>1</sup>H} NMR** (101 MHz, Chloroform-*d*) 172.3, 71.8, 56.2, 45.6, 27.4, 24.9. **HRMS** (ESI) *m/z* calculated for [C<sub>6</sub>H<sub>11</sub>NO<sub>2</sub>Na] ([M+Na<sup>+</sup>]) 152.0682, found 152.0678.

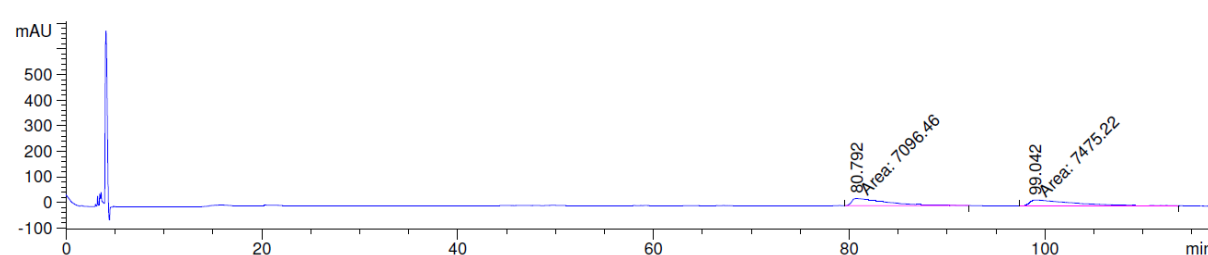

| Peak # | RetTime [min] | Type | Width [min] | Area [mAU*s] | Height [mAU] | Area %  |
|--------|---------------|------|-------------|--------------|--------------|---------|
| 1      | 80.792        | MM   | 4.1233      | 7096.45654   | 28.68446     | 48.7003 |
| 2      | 99.042        | MM   | 5.4963      | 7475.21973   | 22.66737     | 51.2997 |

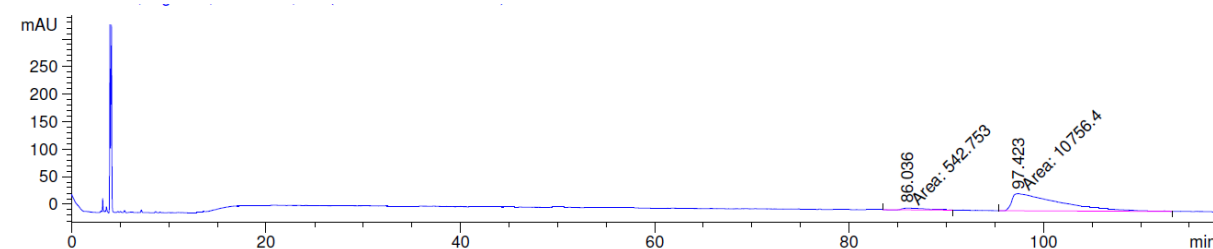

| Peak # | RetTime [min] | Type | Width [min] | Area [mAU*s] | Height [mAU] | Area %  |
|--------|---------------|------|-------------|--------------|--------------|---------|
| 1      | 86.036        | MM   | 2.7654      | 542.75256    | 3.27108      | 4.8035  |
| 2      | 97.423        | MM   | 5.7950      | 1.07564e4    | 30.93561     | 95.1965 |

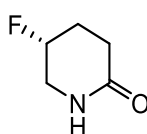

**(R)-5-Fluoropiperidin-2-one:** The title compound was prepared following a modification of the General Procedure using (*R*)-3-(5-fluoropyridin-2-yl)-4-isopropylloxazolidin-2-one (112 mg, 0.50 mmol, 1.0 equiv.), 20 wt% Pd(OH)<sub>2</sub>/C (17.6 mg, 5 mol%), aq. HCl (100 μl, 2.4 equiv., 12 M) in H<sub>2</sub>O/THF (0.5 M, 1/1). The product was isolated after column chromatography (eluent: CH<sub>2</sub>Cl<sub>2</sub>, later CH<sub>2</sub>Cl<sub>2</sub>/MeOH 99:1, 98:2, 97:3, 95:5) as off-white solid (37 mg, 0.32 mmol, 64%, 97:3 e.r.) accompanied with traces of defluorinated piperidone. The enantiomeric ratio of the product was determined after purification using gas chromatography (HYDRODEX β-6TBDM column, 25 m, 0.25 mm ID; carrier gas: H<sub>2</sub>; injection temperature 230 °C; oven temperature 50 °C, heating rate: 5 °C/min to 80 °C, then 0.5 °C/min to 120 °C, hold for 10 min, 0.5 °C/min to 125 °C, hold for 10 min, 0.5 °C/min to 130 °C, hold for 10 min, 0.5 °C/min to 135 °C, hold for 10 min, 0.5 °C/min to 140 °C, hold for 10 min, 0.5 °C/min to 160 °C, and 5 °C/min to 220 °C.

**<sup>1</sup>H NMR** (400 MHz, Chloroform-*d*) 7.33 (s, 1H), 4.94 (dm, *J* = 48.0 Hz, 1H), 3.61 – 3.36 (m, 2H), 2.58 – 2.45 (m, 1H), 2.37 – 2.26 (m, 1H), 2.25 – 2.13 (m, 1H), 2.03 – 1.80 (m, 1H). **<sup>13</sup>C{<sup>1</sup>H} NMR** (101 MHz, Chloroform-*d*) 171.7, 84.1 (d, *J* = 173.4 Hz), 46.6 (d, *J* = 23.2 Hz), 26.1 (d, *J* = 5.3 Hz), 25.6 (d, *J* = 21.2 Hz). **<sup>19</sup>F NMR** (376 MHz, Chloroform-*d*) –187.1. **HRMS** (ESI) *m/z* calculated for [C<sub>5</sub>H<sub>8</sub>NOFNa] ([M+Na<sup>+</sup>]) 140.0482, found 140.0482.

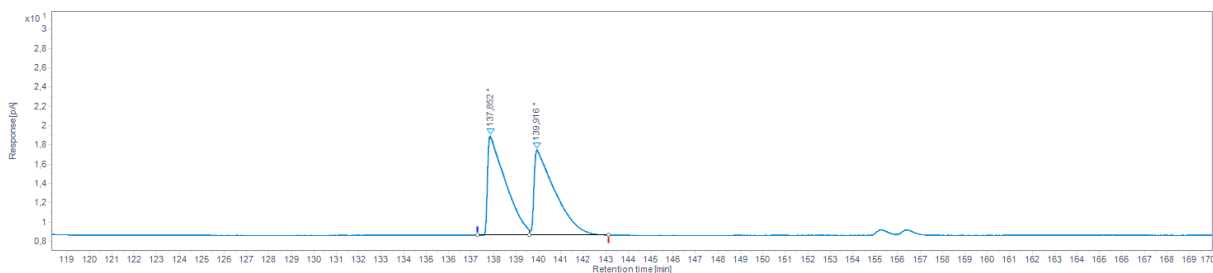

| # | Name  | Signal description | RT (min) | Area    | Area%  | Height | Height% | Amount | Concentration | Start time (min) | End time (min) |
|---|-------|--------------------|----------|---------|--------|--------|---------|--------|---------------|------------------|----------------|
| 1 | FID1A |                    | 137,852  | 572,392 | 50,054 | 10,277 | 53,77   |        |               | 137,264          | 139,616        |
| 2 | FID1A |                    | 139,916  | 571,153 | 49,946 | 8,834  | 46,23   |        |               | 139,616          | 143,107        |

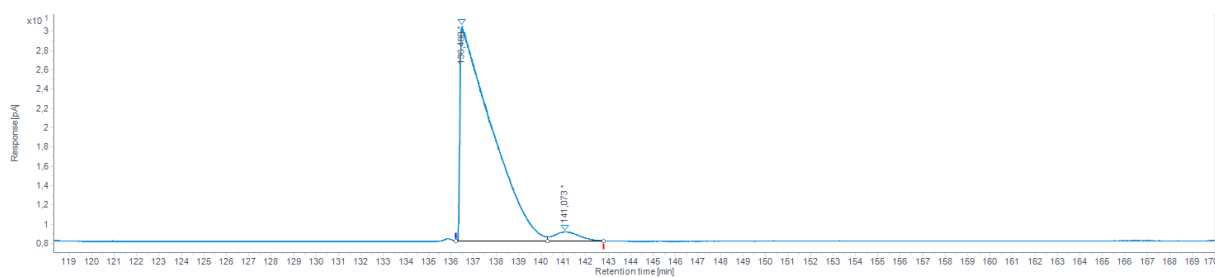

| # | Name  | Signal description | RT (min) | Area     | Area%  | Height | Height% | Amount | Concentration | Start time (min) | End time (min) |
|---|-------|--------------------|----------|----------|--------|--------|---------|--------|---------------|------------------|----------------|
| 1 | FID1A |                    | 136,480  | 2162,445 | 96,702 | 22,241 | 95,92   |        |               | 136,198          | 140,277        |
| 2 | FID1A |                    | 141,073  | 73,750   | 3,298  | 0,946  | 4,08    |        |               | 140,277          | 142,776        |

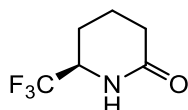

**(R)-6-(Trifluoromethyl)piperidin-2-one:** The title compound was prepared following the General Procedure using (*S*)-4-benzyl-3-(6-(trifluoromethyl)pyridin-2-yl)oxazolidin-2-one (97 mg, 0.30 mmol, 1.0 equiv.) The product was isolated after column chromatography (eluent: CH<sub>2</sub>Cl<sub>2</sub>, later CH<sub>2</sub>Cl<sub>2</sub>/MeOH 99:1, 98:2, 97:3, 95:5) as white solid (16 mg, 0.10 mmol, 32%, 97:3 e.r.). The enantiomeric ratio of the product was determined after purification using HPLC Daicel CHIRALPAK IA-3, *n*-hexane:2-propanol = 97:3, flow rate = 1 mL/min, λ = 210 nm, retention time: 8.9 min (minor), 9.9 min (major).

**<sup>1</sup>H NMR** (400 MHz, Chloroform-*d*) 6.43 (s, 1H), 3.99 – 3.85 (m, 1H), 2.50 – 2.29 (m, 2H), 2.13 – 1.95 (m, 2H), 1.92 – 1.69 (m, 2H), 1.30 – 1.18 (m, 1H). **<sup>13</sup>C{<sup>1</sup>H} NMR** (101 MHz, Chloroform-*d*) 172.2, 124.7 (q, *J* = 281.0 Hz), 54.1 (q, *J* = 30.9 Hz), 31.3, 21.2 (q, *J* = 1.9 Hz), 18.4. **<sup>19</sup>F NMR** (376 MHz, Chloroform-*d*) –78.0. **HRMS** (ESI) *m/z* calculated for [C<sub>6</sub>H<sub>8</sub>NOF<sub>3</sub>Na] ([M+Na<sup>+</sup>]) 190.0450, found 190.0450.

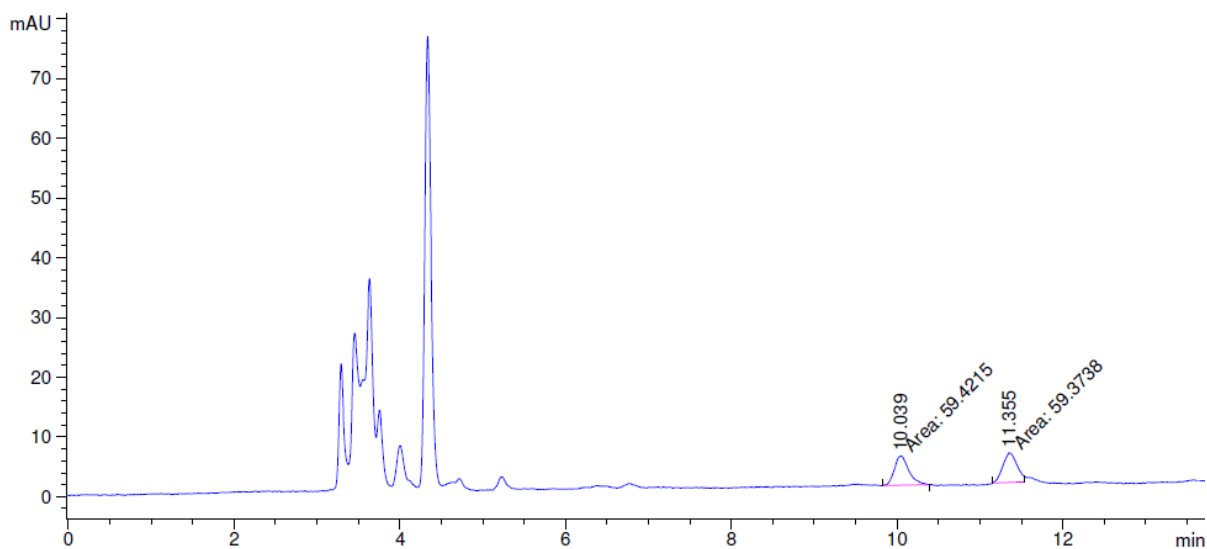

| Peak # | RetTime [min] | Type | Width [min] | Area [mAU*s] | Height [mAU] | Area %  |
|--------|---------------|------|-------------|--------------|--------------|---------|
| 1      | 10.039        | MM   | 0.2041      | 59.42149     | 4.85253      | 50.0201 |
| 2      | 11.355        | MM   | 0.1986      | 59.37382     | 4.98265      | 49.9799 |

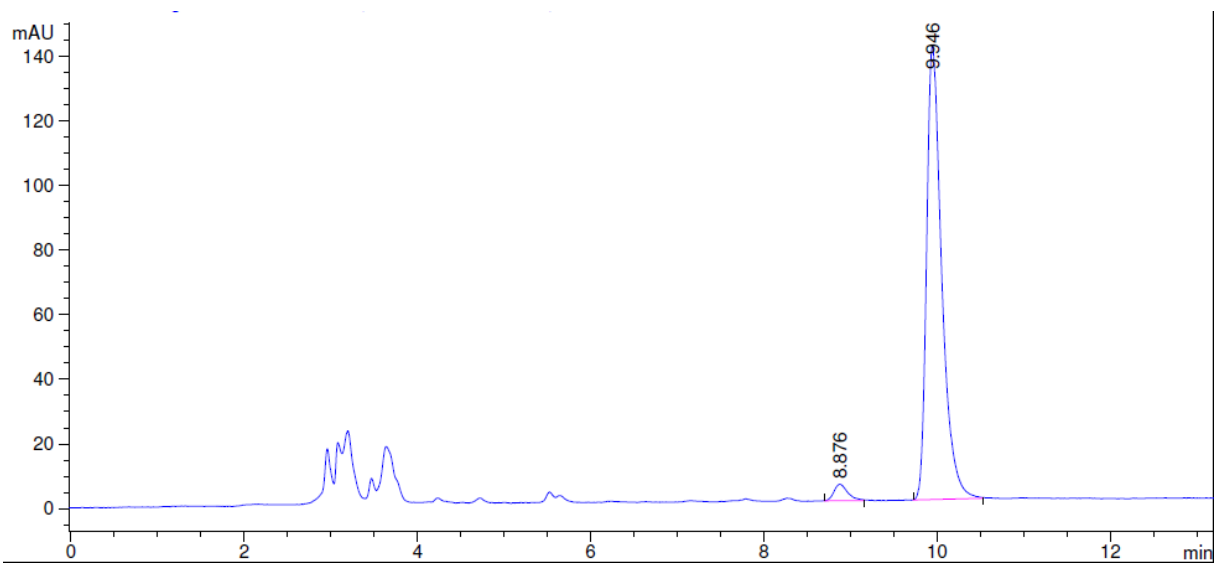

| Peak # | RetTime [min] | Type | Width [min] | Area [mAU*s] | Height [mAU] | Area %  |
|--------|---------------|------|-------------|--------------|--------------|---------|
| 1      | 8.876         | BB   | 0.1516      | 55.62970     | 5.04680      | 3.1631  |
| 2      | 9.946         | BB   | 0.1826      | 1703.10596   | 140.34044    | 96.8369 |

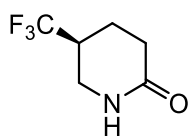

**(S)-5-(Trifluoromethyl)piperidin-2-one:** The title compound was prepared following the General Procedure using (S)-4-isopropyl-3-(5-(trifluoromethyl)pyridin-2-yl)oxazolidin-2-one (82 mg, 0.30 mmol, 1.0 equiv.) The product was isolated after column chromatography (eluent: CH<sub>2</sub>Cl<sub>2</sub>, later CH<sub>2</sub>Cl<sub>2</sub>/MeOH 99:1, 98:2, 97:3, 95:5) as off-white solid (33 mg, 0.20 mmol, 66%, 96:4 e.r.). The enantiomeric ratio of the product was determined after purification using gas chromatography (HYDRODEX β-6TBDM column, 25 m, 0.25 mm ID; carrier gas: H<sub>2</sub>; injection temperature 230 °C; oven temperature 50 °C, heating rate: 0.5 °C/min).

**<sup>1</sup>H NMR** (400 MHz, Chloroform-*d*) 7.30 (s, 1H), 3.56 – 3.45 (m, 1H), 3.34 (t, *J* = 11.4 Hz, 1H), 2.63 – 2.45 (m, 2H), 2.36 (ddd, *J* = 18.0, 11.5, 6.6 Hz, 1H), 2.16 – 2.06 (m, 1H), 1.86 (dtd, *J* = 13.5, 11.5, 6.1 Hz, 1H). **<sup>13</sup>C{<sup>1</sup>H} NMR** (101 MHz, Chloroform-*d*) 171.6, 126.5 (q, *J* = 278.5 Hz), 40.6 (q, *J* = 3.3 Hz), 38.0 (q, *J* = 27.9 Hz), 29.6, 20.3 (d, *J* = 2.5 Hz). **<sup>19</sup>F NMR** (376 MHz, Chloroform-*d*) –72.2. **HRMS** (ESI) *m/z* calculated for [C<sub>6</sub>H<sub>8</sub>NOF<sub>3</sub>Na] ([M+Na<sup>+</sup>]) 190.0450, found 190.0449.

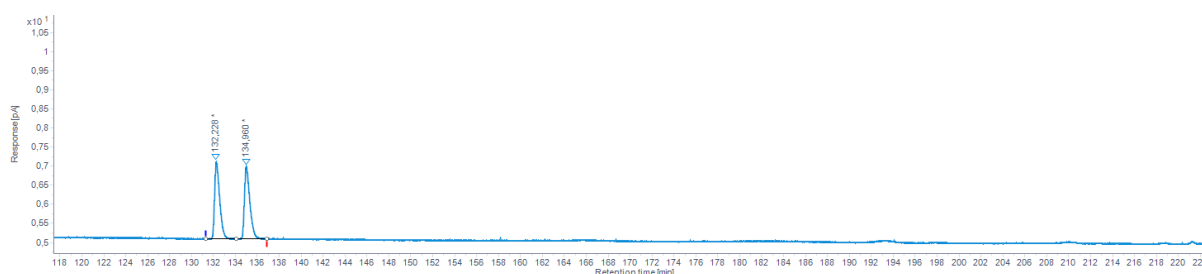

| # | Name | Signal description | RT (min) | Area   | Area%  | Height | Height% | Amount | Concentration | Start time (min) | End time (min) |
|---|------|--------------------|----------|--------|--------|--------|---------|--------|---------------|------------------|----------------|
| 1 |      | FID1A              | 132,228  | 64,287 | 49,650 | 2,038  | 51,47   |        |               | 131,333          | 134,043        |
| 2 |      | FID1A              | 134,960  | 65,192 | 50,350 | 1,921  | 48,53   |        |               | 134,043          | 136,829        |

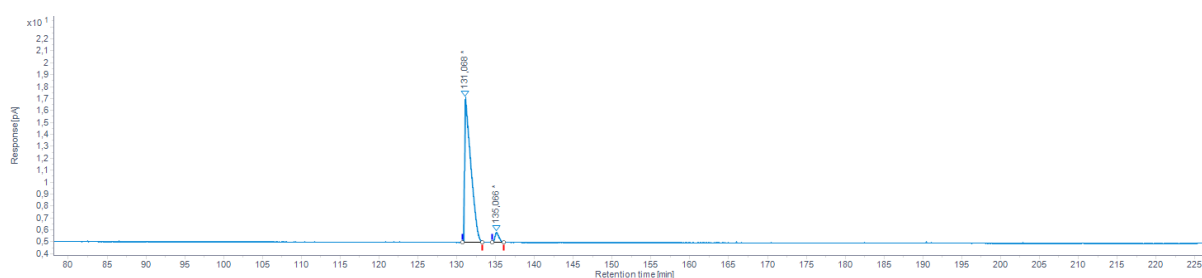

| # | Name | Signal description | RT (min) | Area    | Area%  | Height | Height% | Amount | Concentration | Start time (min) | End time (min) |
|---|------|--------------------|----------|---------|--------|--------|---------|--------|---------------|------------------|----------------|
| 1 |      | FID1A              | 131,068  | 667,395 | 95,917 | 12,138 | 93,64   |        |               | 130,708          | 133,318        |
| 2 |      | FID1A              | 135,066  | 28,407  | 4,083  | 0,824  | 6,36    |        |               | 134,593          | 136,034        |

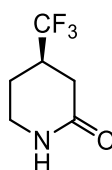

**(R)-4-(Trifluoromethyl)piperidin-2-one:** The title compound was prepared following the General Procedure using (S)-4-benzyl-3-(4-(trifluoromethyl)pyridin-2-yl)oxazolidin-2-one (97 mg, 0.30 mmol, 1.0 equiv.) The product was isolated after column chromatography (eluent:



CH<sub>2</sub>Cl<sub>2</sub>, later CH<sub>2</sub>Cl<sub>2</sub>/MeOH 99:1, 98:2, 97:3, 95:5) as off-white solid (33 mg, 0.20 mmol, 66%, 93:7 e.r.). The enantiomeric ratio of the product was determined after purification using gas chromatography (HYDRODEX β-6TBDM column, 25 m, 0.25 mm ID; carrier gas: H<sub>2</sub>; injection temperature 230 °C; oven temperature 50 °C, heating rate: 0.5 °C/min to 220 °C).

<sup>1</sup>H NMR (400 MHz, Chloroform-*d*) 6.69 (s, 1H), 3.50 – 3.40 (m, 1H), 3.39 – 3.28 (m, 1H), 2.67 – 2.52 (m, 2H), 2.45 – 2.33 (m, 1H), 2.17 – 2.06 (m, 1H), 1.85 – 1.72 (m, 1H). <sup>13</sup>C{<sup>1</sup>H} NMR (101 MHz, Chloroform-*d*) 169.6, 126.6 (q, *J* = 278.3 Hz), 40.4, 37.8 (q, *J* = 28.7 Hz), 30.5 (q, *J* = 2.5 Hz), 21.7 (q, *J* = 2.8 Hz). <sup>19</sup>F NMR (376 MHz, Chloroform-*d*) –74.0. HRMS (ESI) *m/z* calculated for [C<sub>6</sub>H<sub>8</sub>NOF<sub>3</sub>Na] ([M+Na<sup>+</sup>]) 190.0450, found 190.0449.

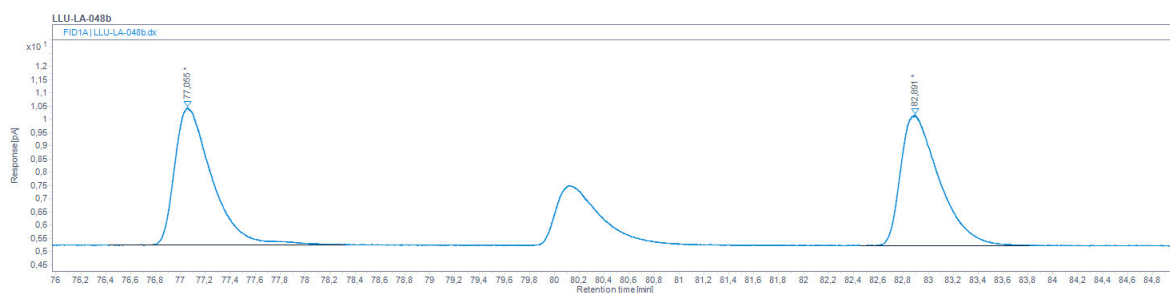

| # | Name  | Signal description | RT (min) | Area    | Area%  | Height | Height% | Amount | Concentration | Start time (min) | End time (min) |
|---|-------|--------------------|----------|---------|--------|--------|---------|--------|---------------|------------------|----------------|
| 1 | FID1A |                    | 77,055   | 108,228 | 50,565 | 5,202  | 51,28   |        |               | 76,426           | 78,317         |
| 2 | FID1A |                    | 82,891   | 105,810 | 49,435 | 4,942  | 48,72   |        |               | 82,457           | 83,811         |

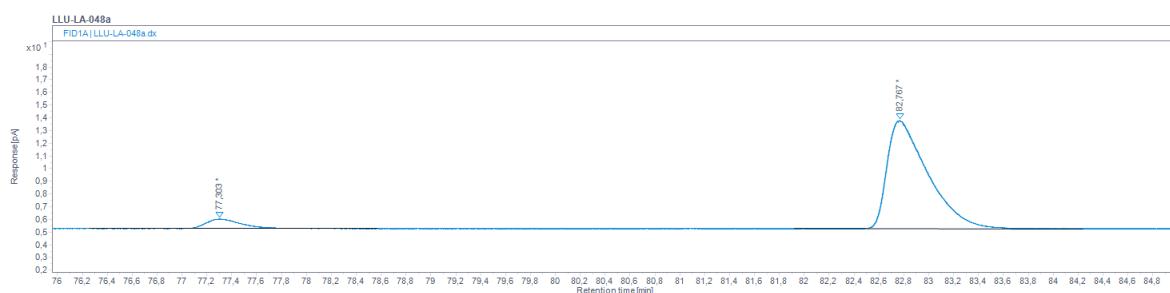

| # | Name  | Signal description | RT (min) | Area    | Area%  | Height | Height% | Amount | Concentration | Start time (min) | End time (min) |
|---|-------|--------------------|----------|---------|--------|--------|---------|--------|---------------|------------------|----------------|
| 1 | FID1A |                    | 77,303   | 14,418  | 6,928  | 0,757  | 8,15    |        |               | 76,255           | 78,573         |
| 2 | FID1A |                    | 82,767   | 193,686 | 93,072 | 8,533  | 91,85   |        |               | 81,922           | 84,240         |

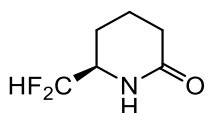

**(R)-6-(Difluoromethyl)piperidin-2-one:** The title compound was prepared following the General Procedure using (S)-4-benzyl-3-(6-(difluoromethyl)pyridin-2-yl)oxazolidin-2-one (91 mg, 0.30 mmol, 1.0 equiv.) The product was isolated after column chromatography (eluent: CH<sub>2</sub>Cl<sub>2</sub>, later CH<sub>2</sub>Cl<sub>2</sub>/MeOH 99:1, 98:2, 97:3, 95:5) as white solid (33 mg, 0.22 mmol, 73%, 99:1 e.r.). The enantiomeric ratio of the product was determined after purification using HPLC Daicel CHIRALPAK IA-3, *n*-hexane:2-propanol = 97:3, flow rate = 1 mL/min, λ = 210 nm, retention time: 49.8 min (minor), 53.2 min (major).

**<sup>1</sup>H NMR** (400 MHz, Chloroform-*d*) 6.10 (s, 1H), 5.61 (ddd, *J* = 56.5, 55.3, 5.3 Hz, 1H), 3.76 – 3.58 (m, 1H), 2.51 – 2.28 (m, 2H), 2.07 – 1.89 (m, 2H), 1.84 – 1.60 (m, 2H). **<sup>13</sup>C{<sup>1</sup>H} NMR** (101 MHz, Chloroform-*d*) 172.1, 115.7 (t, *J* = 244.6 Hz), 54.5 (dd, *J* = 25.8, 20.7 Hz), 31.5, 22.1 (dd, *J* = 4.7, 2.7 Hz), 18.9. **<sup>19</sup>F NMR** (376 MHz, Chloroform-*d*) –125.8 (d, *J* = 288.0 Hz), –128.0 (d, *J* = 287.9 Hz). **HRMS** (ESI) *m/z* calculated for [C<sub>6</sub>H<sub>9</sub>NOF<sub>2</sub>Na] ([M+Na<sup>+</sup>]) 172.0544, found 172.0541.

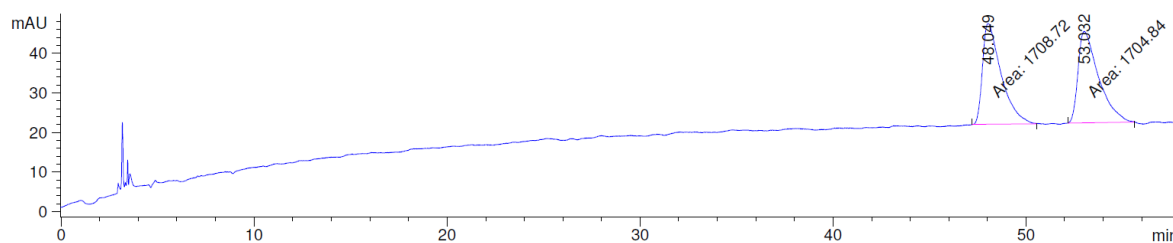

| Peak # | RetTime [min] | Type | Width [min] | Area [mAU*s] | Height [mAU] | Area %  |
|--------|---------------|------|-------------|--------------|--------------|---------|
| 1      | 48.049        | MM   | 1.1187      | 1708.71570   | 25.45671     | 50.0567 |
| 2      | 53.032        | MM   | 1.2330      | 1704.84497   | 23.04412     | 49.9433 |

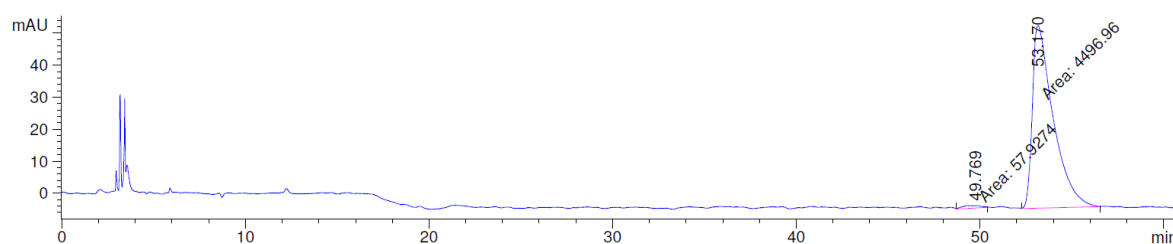

| Peak # | RetTime [min] | Type | Width [min] | Area [mAU*s] | Height [mAU] | Area %  |
|--------|---------------|------|-------------|--------------|--------------|---------|
| 1      | 49.769        | MM   | 1.2831      | 57.92736     | 7.52429e-1   | 1.2718  |
| 2      | 53.170        | MM   | 1.3129      | 4496.96436   | 57.08585     | 98.7282 |

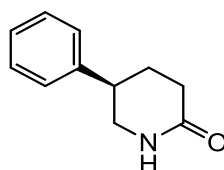

**(*R*)-5-Phenylpiperidin-2-one:** The title compound was prepared following the General Procedure using (*S*)-4-benzyl-3-(5-phenylpyridin-2-yl)oxazolidin-2-one (99 mg, 0.30 mmol, 1.0 equiv.) The product was isolated after column chromatography (eluent: CH<sub>2</sub>Cl<sub>2</sub>, later CH<sub>2</sub>Cl<sub>2</sub>/MeOH 99:1, 98:2, 97:3, 95:5) as off-white solid (39 mg, 0.22 mmol, 74%, 90:10 e.r.). The enantiomeric ratio of the product was determined after purification using HPLC Daicel CHIRALPAK IA-3, *n*-hexane:2-propanol = 97:3, flow rate = 1 mL/min, λ = 210 nm, retention time: 70.6 min (major), 85.6 min (minor).

**<sup>1</sup>H NMR** (400 MHz, Chloroform-*d*) 7.30 – 7.24 (m, 2H), 7.23 – 7.16 (m, 3H), 6.29 (s, 1H), 3.47 – 3.40 (m, 1H), 3.35 – 3.27 (m, 1H), 3.04 – 2.93 (m, 1H), 2.54 – 2.37 (m, 2H), 2.09 – 1.93 (m, 2H). **<sup>13</sup>C{<sup>1</sup>H} NMR** (101 MHz, Chloroform-*d*) 172.0, 141.9, 128.9, 127.3, 127.1, 48.8, 39.7, 31.4, 27.9. **HRMS** (ESI) *m/z* calculated for [C<sub>11</sub>H<sub>13</sub>NONa] ([M+Na<sup>+</sup>]) 198.0889, found 198.0887.

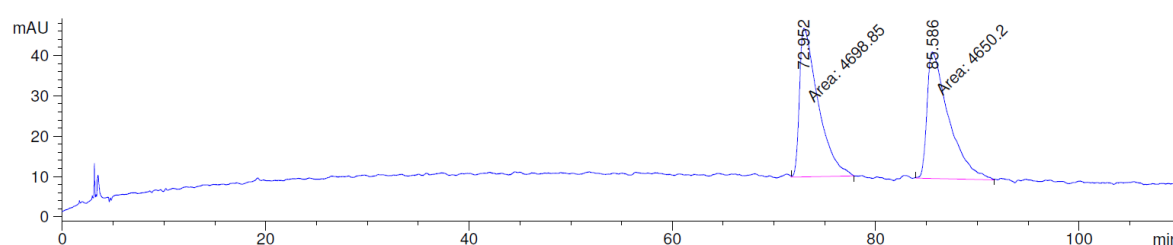

| Peak # | RetTime [min] | Type | Width [min] | Area [mAU*s] | Height [mAU] | Area %  |
|--------|---------------|------|-------------|--------------|--------------|---------|
| 1      | 72.952        | MM   | 2.1268      | 4698.85156   | 36.82318     | 50.2602 |
| 2      | 85.586        | MM   | 2.4694      | 4650.19727   | 31.38603     | 49.7398 |

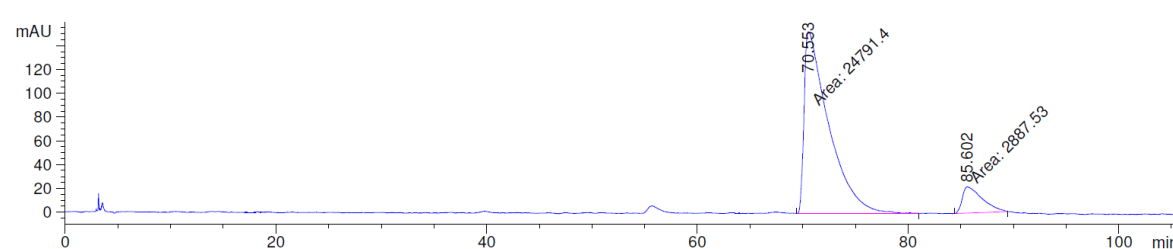

| Peak # | RetTime [min] | Type | Width [min] | Area [mAU*s] | Height [mAU] | Area %  |
|--------|---------------|------|-------------|--------------|--------------|---------|
| 1      | 70.553        | MM   | 2.7016      | 2.47914e4    | 152.94334    | 89.5678 |
| 2      | 85.602        | MM   | 2.1833      | 2887.53003   | 22.04277     | 10.4322 |

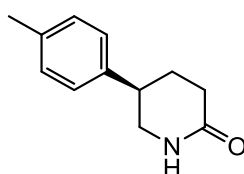

**(R)-5-(p-Tolyl)piperidin-2-one:** The title compound was prepared following the General Procedure using (*S*)-4-isopropyl-3-(5-(*p*-tolyl)pyridin-2-yl)oxazolidin-2-one (89 mg, 0.30 mmol, 1.0 equiv.) The product was isolated after column chromatography (eluent: CH<sub>2</sub>Cl<sub>2</sub>, later CH<sub>2</sub>Cl<sub>2</sub>/MeOH 99:1, 98:2, 97:3) as white solid (37 mg, 0.19 mmol, 65%, 88:12 e.r.). The enantiomeric ratio of the product was determined after purification using gas chromatography (HYDRODEX β-6TBDM column, 25 m, 0.25 mm ID; carrier gas: H<sub>2</sub>; injection temperature 230 °C; oven temperature 50 °C, heating rate: 5 °C/min to 120 °C, then 1 °C/min to 220 °C).

**<sup>1</sup>H NMR** (400 MHz, Chloroform-*d*) 7.23 – 6.93 (m, 5H), 3.47 – 3.35 (m, 1H), 3.34 – 3.21 (m, 1H), 2.94 (ddt, *J* = 15.8, 10.7, 5.4 Hz, 1H), 2.44 (dtd, *J* = 13.3, 10.2, 8.3, 4.2 Hz, 2H), 2.31 – 2.20 (m, 3H), 2.06 –

1.90 (m, 2H).  $^{13}\text{C}\{^1\text{H}\}$  NMR (101 MHz, Chloroform-*d*) 172.3, 138.8, 136.7, 129.4, 126.8, 48.6, 39.1, 31.3, 27.9, 21.0. HRMS (ESI) *m/z* calculated for  $[\text{C}_{12}\text{H}_{15}\text{NONa}]$  ( $[\text{M}+\text{Na}^+]$ ) 212.1046, found 212.1043.

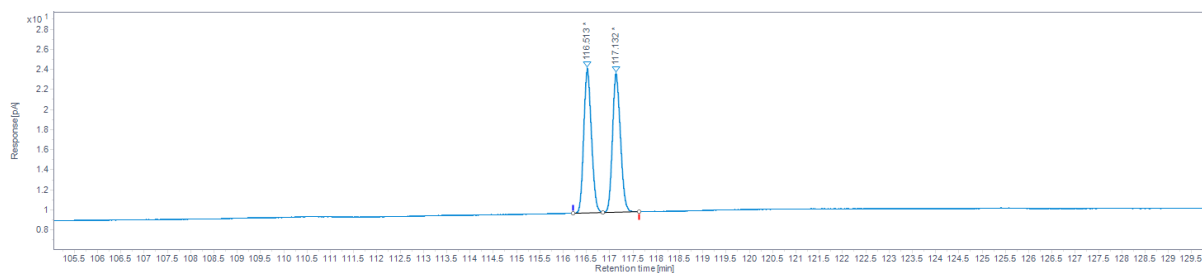

| # | Name | Signal description | RT (min) | Area    | Area%  | Height | Height% | Amount | Concentration | Start time (min) | End time (min) |
|---|------|--------------------|----------|---------|--------|--------|---------|--------|---------------|------------------|----------------|
| 1 |      | FID1A              | 116.513  | 163.462 | 50.113 | 14.394 | 50.98   |        |               | 116.223          | 116.861        |
| 2 |      | FID1A              | 117.132  | 162.725 | 49.887 | 13.842 | 49.02   |        |               | 116.861          | 117.624        |

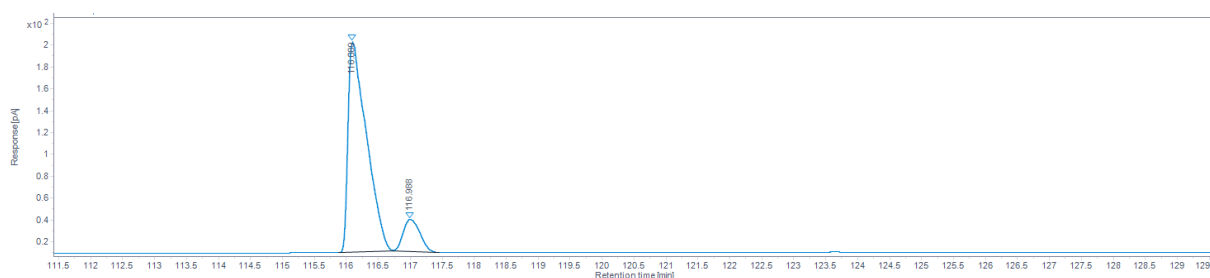

| # | Name | Signal description | RT (min) | Area     | Area%  | Height  | Height% | Amount | Concentration | Start time (min) | End time (min) |
|---|------|--------------------|----------|----------|--------|---------|---------|--------|---------------|------------------|----------------|
| 1 |      | FID1A              | 116.089  | 3869.753 | 88.038 | 192.552 | 86.82   |        |               | 115.873          | 116.728        |
| 2 |      | FID1A              | 116.988  | 525.810  | 11.962 | 29.233  | 13.18   |        |               | 116.730          | 117.452        |

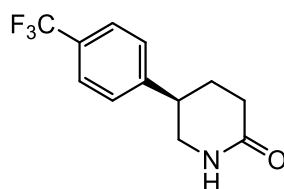

**(*R*)-5-(4-(Trifluoromethyl)phenyl)piperidin-2-one:** The title compound was prepared following the General Procedure using (*S*)-4-isopropyl-3-(5-(4-(trifluoromethyl)phenyl)pyridin-2-yl)oxazolidin-2-one (105 mg, 0.30 mmol, 1.0 equiv.) The product was isolated after column chromatography (eluent:  $\text{CH}_2\text{Cl}_2$ , later  $\text{CH}_2\text{Cl}_2/\text{MeOH}$  99:1, 98:2, 97:3) as white solid (63 mg, 0.26 mmol, 87%, 95:5 e.r.). The enantiomeric ratio of the product was determined after purification using gas chromatography (HYDRODEX  $\beta$ -6TBDM column, 25 m, 0.25 mm ID; carrier gas:  $\text{H}_2$ ; injection temperature 230 °C; oven temperature 50 °C, heating rate: 5 °C/min to 120 °C, then 1 °C/min to 220 °C).

$^1\text{H}$  NMR (400 MHz, Chloroform-*d*) 7.58 (d,  $J = 8.1$  Hz, 2H), 7.42 (s, 1H), 7.35 (d,  $J = 8.1$  Hz, 2H), 3.55 – 3.45 (m, 1H), 3.37 (t,  $J = 11.3$  Hz, 1H), 3.10 (tt,  $J = 10.2, 4.7$  Hz, 1H), 2.58 – 2.41 (m, 2H), 2.15 – 1.99 (m, 2H).  $^{13}\text{C}\{^1\text{H}\}$  NMR (101 MHz, Chloroform-*d*) 172.2, 145.9 (d,  $J = 1.4$  Hz), 129.5 (q,  $J = 32.5$  Hz), 127.5, 125.8 (q,  $J = 3.8$  Hz), 124.1 (q,  $J = 271.9$  Hz), 48.2, 39.4, 31.1, 27.7.  $^{19}\text{F}\{^1\text{H}\}$  NMR (377 MHz,

Chloroform-*d*) –62.5. **HRMS** (ESI) *m/z* calculated for [C<sub>12</sub>H<sub>12</sub>NOF<sub>3</sub>Na] ([M+Na<sup>+</sup>]) 266.0763, found 266.0760.

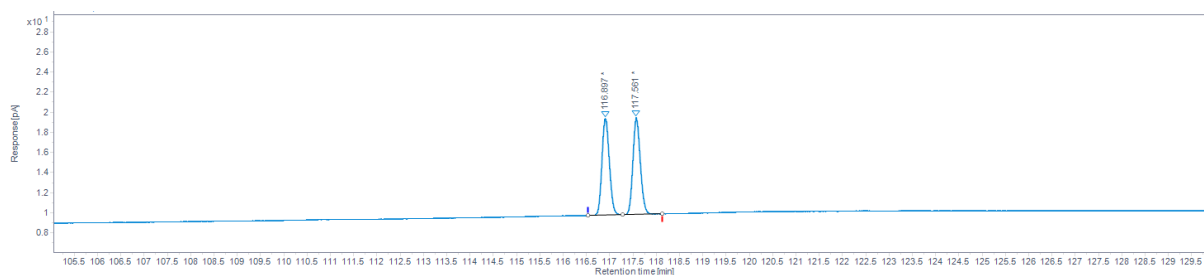

| # | Name | Signal description | RT (min) | Area    | Area%  | Height | Height% | Amount | Concentration | Start time (min) | End time (min) |
|---|------|--------------------|----------|---------|--------|--------|---------|--------|---------------|------------------|----------------|
| 1 |      | FID1A              | 116.897  | 106.134 | 49.985 | 9.630  | 50.03   |        |               | 116.525          | 117.269        |
| 2 |      | FID1A              | 117.561  | 106.198 | 50.015 | 9.617  | 49.97   |        |               | 117.269          | 118.120        |

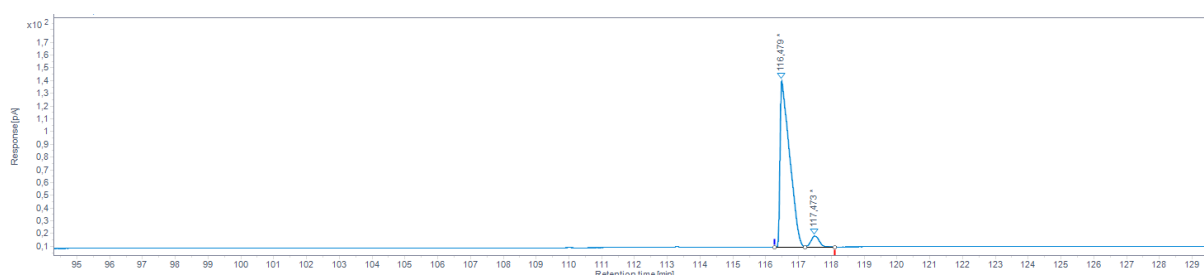

| # | Name | Signal description | RT (min) | Area     | Area%  | Height  | Height% | Amount | Concentration | Start time (min) | End time (min) |
|---|------|--------------------|----------|----------|--------|---------|---------|--------|---------------|------------------|----------------|
| 1 |      | FID1A              | 116,479  | 2637,808 | 94,607 | 131,294 | 93,85   |        |               | 116,271          | 117,188        |
| 2 |      | FID1A              | 117,473  | 150,377  | 5,393  | 8,605   | 6,15    |        |               | 117,188          | 118,105        |

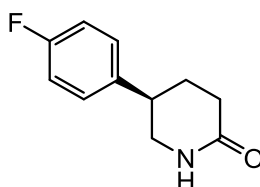

**(R)-5-(4-fluorophenyl)piperidin-2-one:** The title compound was prepared following the General Procedure using (*S*)-4-isopropyl-3-(5-(4-fluorophenyl)pyridin-2-yl)oxazolidin-2-one (90 mg, 0.30 mmol, 1.0 equiv.) The product was isolated after column chromatography (eluent: CH<sub>2</sub>Cl<sub>2</sub>, later CH<sub>2</sub>Cl<sub>2</sub>/MeOH 99:1, 98:2, 97:3) as white solid (44 mg, 0.23 mmol, 76%, 92:8 e.r.). The enantiomeric ratio of the product was determined after purification using gas chromatography (HYDRODEX β-6TBDM column, 25 m, 0.25 mm ID; carrier gas: H<sub>2</sub>; injection temperature 230 °C; oven temperature 50 °C, heating rate: 5 °C/min to 120 °C, then 1 °C/min to 220 °C.)

**<sup>1</sup>H NMR** (400 MHz, Chloroform-*d*) 7.22 (s, 1H), 7.21 – 7.16 (m, 2H), 7.04 – 6.95 (m, 2H), 3.50 – 3.42 (m, 1H), 3.30 (t, *J* = 11.4 Hz, 1H), 3.06 – 2.96 (m, 1H), 2.56 – 2.39 (m, 2H), 2.11 – 1.93 (m, 2H). **<sup>13</sup>C{<sup>1</sup>H} NMR** (101 MHz, Chloroform-*d*) 172.2, 161.9 (d, *J* = 245.3 Hz), 137.6 (d, *J* = 3.3 Hz), 128.5 (d, *J* = 8.0 Hz), 115.6 (d, *J* = 21.3 Hz), 48.7 (d, *J* = 1.1 Hz), 38.9, 31.2, 27.9. **<sup>19</sup>F{<sup>1</sup>H} NMR** (377 MHz, Chloroform-*d*) –115.6. **HRMS** (ESI) *m/z* calculated for [C<sub>11</sub>H<sub>12</sub>NOFNa] ([M+Na<sup>+</sup>]) 216.0795, found 216.0793.

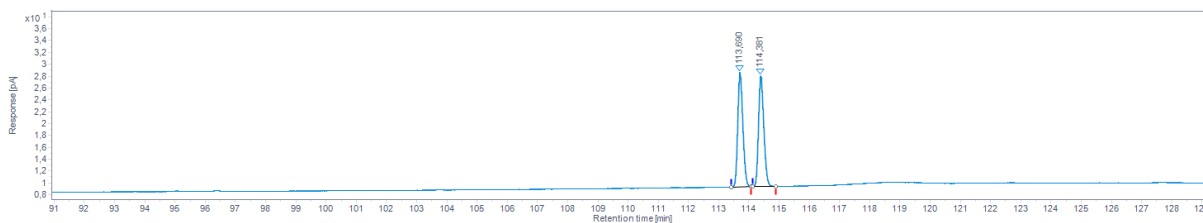

| # | Name | Signal description | RT (min) | Area    | Area%  | Height | Height% | Amount | Concentration | Start time (min) | End time (min) |
|---|------|--------------------|----------|---------|--------|--------|---------|--------|---------------|------------------|----------------|
| 1 |      | FID1A              | 113,690  | 225,238 | 49,969 | 19,332 | 50,95   |        |               | 113,410          | 114,063        |
| 2 |      | FID1A              | 114,381  | 225,513 | 50,031 | 18,610 | 49,05   |        |               | 114,118          | 114,900        |

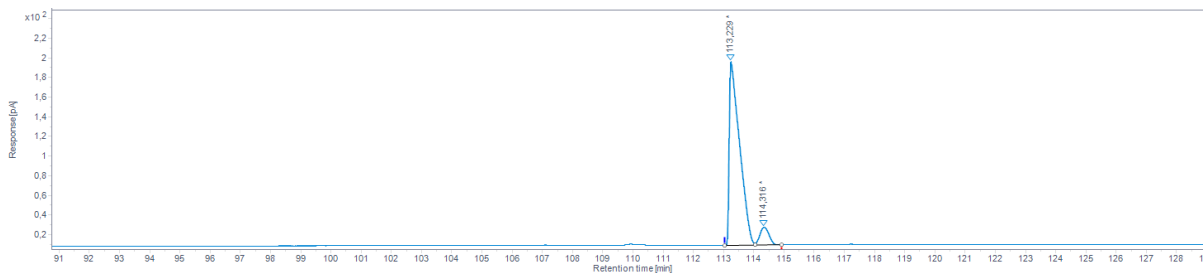

| # | Name | Signal description | RT (min) | Area     | Area%  | Height  | Height% | Amount | Concentration | Start time (min) | End time (min) |
|---|------|--------------------|----------|----------|--------|---------|---------|--------|---------------|------------------|----------------|
| 1 |      | FID1A              | 113,229  | 4431,741 | 92,133 | 186,488 | 91,10   |        |               | 113,043          | 114,033        |
| 2 |      | FID1A              | 114,316  | 378,429  | 7,867  | 18,226  | 8,90    |        |               | 114,033          | 114,935        |

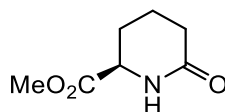

**Methyl (*R*)-6-oxopiperidine-2-carboxylate:** The title compound was prepared following the General Procedure using (*S*)-6-(4-benzyl-2-oxooxazolidin-3-yl)picolinate (94 mg, 0.30 mmol, 1.0 equiv.) The product was isolated after column chromatography (eluent: CH<sub>2</sub>Cl<sub>2</sub>, later CH<sub>2</sub>Cl<sub>2</sub>/MeOH 99:1, 98:2, 97:3) as yellow oil (42 mg, 0.27 mmol, 89%, 96:4 e.r.). The enantiomeric ratio of the product was determined after purification using gas chromatography (HYDRODEX β-6TBDM column, 25 m, 0.25 mm ID; carrier gas: H<sub>2</sub>; injection temperature 230 °C; oven temperature 50 °C, heating rate: 0.5 °C/min to 220 °C).

<sup>1</sup>H NMR (400 MHz, Chloroform-*d*) 6.29 (s, 1H), 4.12 – 4.06 (m, 1H), 3.77 (s, 3H), 2.45 – 2.29 (m, 2H), 2.23 – 2.14 (m, 1H), 1.94 – 1.73 (m, 3H). <sup>13</sup>C{<sup>1</sup>H} NMR (101 MHz, Chloroform-*d*) 171.7, 171.4, 54.9, 52.8, 31.2, 25.5, 19.6. **HRMS** (ESI) *m/z* calculated for [C<sub>7</sub>H<sub>11</sub>NO<sub>3</sub>Na] ([M+Na<sup>+</sup>]) 180.0631, found 180.0628.

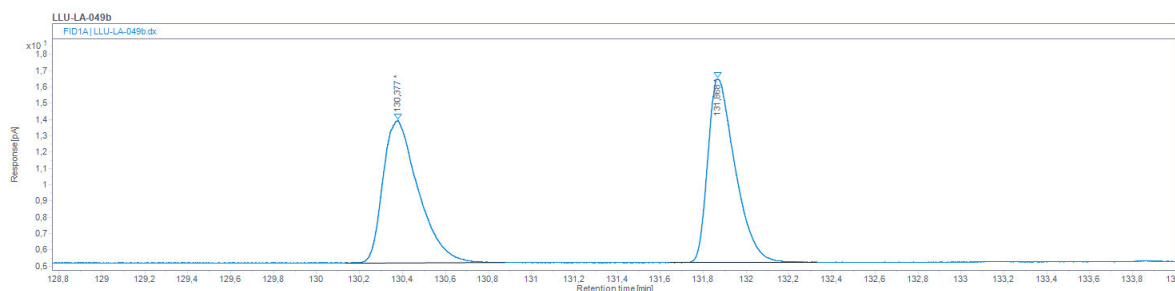

| # | Name | Signal description | RT (min) | Area   | Area%  | Height | Height% | Amount | Concentration | Start time (min) | End time (min) |
|---|------|--------------------|----------|--------|--------|--------|---------|--------|---------------|------------------|----------------|
| 1 |      | FID1A              | 130,377  | 99,388 | 50,025 | 8,729  | 43,72   |        |               | 130,137          | 130,879        |
| 2 |      | FID1A              | 131,868  | 99,287 | 49,975 | 11,238 | 56,28   |        |               | 131,643          | 132,329        |

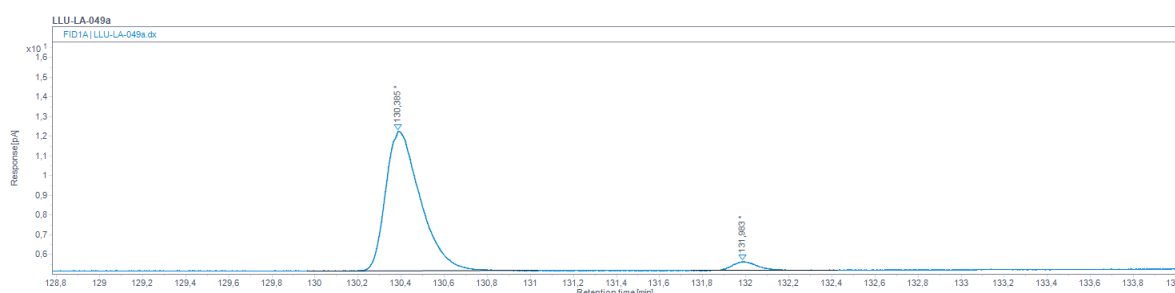

| # | Name | Signal description | RT (min) | Area   | Area%  | Height | Height% | Amount | Concentration | Start time (min) | End time (min) |
|---|------|--------------------|----------|--------|--------|--------|---------|--------|---------------|------------------|----------------|
| 1 |      | FID1A              | 130,385  | 79,614 | 95,871 | 7,084  | 94,16   |        |               | 129,966          | 131,035        |
| 2 |      | FID1A              | 131,983  | 3,429  | 4,129  | 0,439  | 5,84    |        |               | 131,748          | 132,425        |

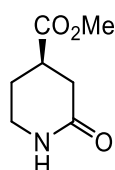

**Methyl (*R*)-6-oxopiperidine-4-carboxylate:** The title compound was prepared following the General Procedure using methyl (*S*)-2-(4-benzyl-2-oxooxazolidin-3-yl)isonicotinate (94 mg, 0.30 mmol, 1.0 equiv.) The product was isolated after column chromatography (eluent: CH<sub>2</sub>Cl<sub>2</sub>, later CH<sub>2</sub>Cl<sub>2</sub>/MeOH 99:1, 98:2, 97:3) as white solid (25 mg, 0.16 mmol, 53%, 93:7 e.r.). The enantiomeric ratio of the product was determined after purification using HPLC Daicel CHIRALPAK IA-3, *n*-hexane:2-propanol = 90:10, flow rate = 1 mL/min, λ = 210 nm, retention time: 22.9 min (major), 25.9 min (minor).

<sup>1</sup>H NMR (400 MHz, Chloroform-*d*) 6.80 (s, 1H), 3.71 (s, 3H), 3.43 – 3.26 (m, 2H), 2.88 – 2.78 (m, 1H), 2.63 – 2.49 (m, 2H), 2.16 – 2.06 (m, 1H), 1.97 – 1.83 (m, 1H). <sup>13</sup>C{<sup>1</sup>H} NMR (101 MHz, Chloroform-*d*) 173.8, 52.3, 40.7, 38.0, 33.5, 25.1. HRMS (ESI) *m/z* calculated for [C<sub>7</sub>H<sub>11</sub>NO<sub>3</sub>Na] ([M+Na<sup>+</sup>]) 180.0631, found 180.0629.

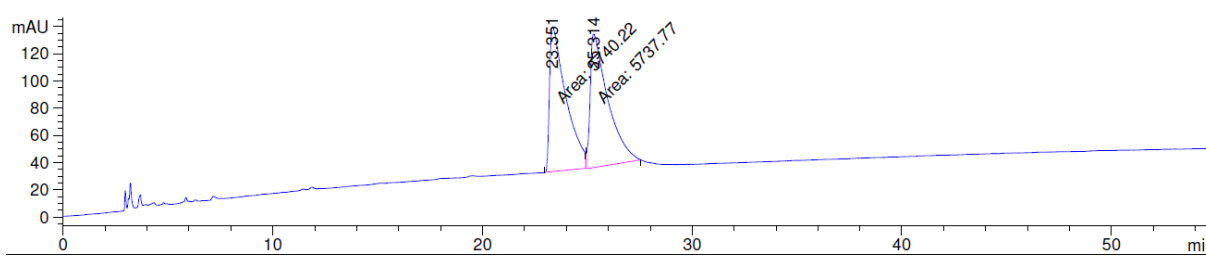

| Peak # | RetTime [min] | Type | Width [min] | Area [mAU*s] | Height [mAU] | Area %  |
|--------|---------------|------|-------------|--------------|--------------|---------|
| 1      | 23.351        | MM   | 0.9006      | 5740.22168   | 106.22820    | 50.0107 |
| 2      | 25.314        | MM   | 0.9754      | 5737.77197   | 98.03738     | 49.9893 |

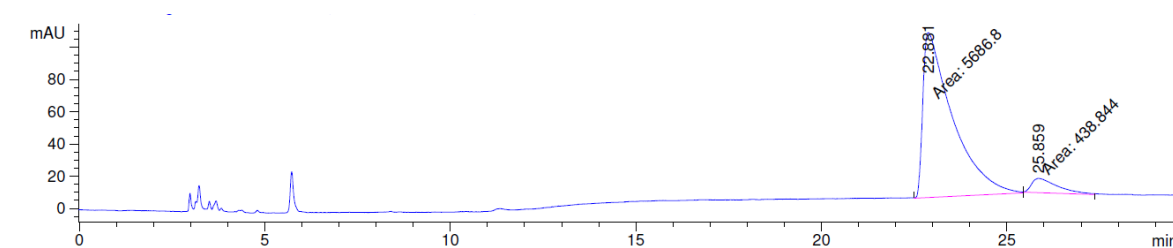

| Peak # | RetTime [min] | Type | Width [min] | Area [mAU*s] | Height [mAU] | Area %  |
|--------|---------------|------|-------------|--------------|--------------|---------|
| 1      | 22.881        | MM   | 0.9274      | 5686.79639   | 102.19711    | 92.8359 |
| 2      | 25.859        | MM   | 0.8235      | 438.84436    | 8.88208      | 7.1641  |

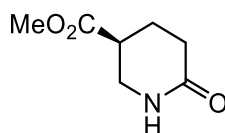

**Methyl (S)-6-oxopiperidine-3-carboxylate:** The title compound was prepared following the General Procedure using methyl (S)-6-(4-benzyl-2-oxooxazolidin-3-yl)nicotinate (94 mg, 0.30 mmol, 1.0 equiv.) The product was isolated after column chromatography (eluent: CH<sub>2</sub>Cl<sub>2</sub>, later CH<sub>2</sub>Cl<sub>2</sub>/MeOH 99:1, 98:2, 97:3) as white solid (39 mg, 0.26 mmol, 86%, 93:7 e.r.). The enantiomeric ratio of the product was determined after purification using gas chromatography (HYDRODEX β-6TBDM column, 25 m, 0.25 mm ID; carrier gas: H<sub>2</sub>; injection temperature 230 °C; oven temperature 50 °C, heating rate: 0.5 °C/min to 220 °C).

<sup>1</sup>H NMR (400 MHz, Chloroform-*d*) 6.49 (s, 1H), 3.72 (s, 3H), 3.54 – 3.49 (m, 2H), 2.83 – 2.73 (m, 1H), 2.53 – 2.31 (m, 2H), 2.20 – 2.10 (m, 1H), 2.07 – 1.94 (m, 1H). <sup>13</sup>C{<sup>1</sup>H} NMR (101 MHz, Chloroform-*d*) 172.8, 171.5, 52.3, 43.5, 38.5, 30.0, 23.7. HRMS (ESI) m/z calculated for [C<sub>7</sub>H<sub>11</sub>NO<sub>3</sub>Na] ([M+Na<sup>+</sup>]) 180.0631, found 180.0628.



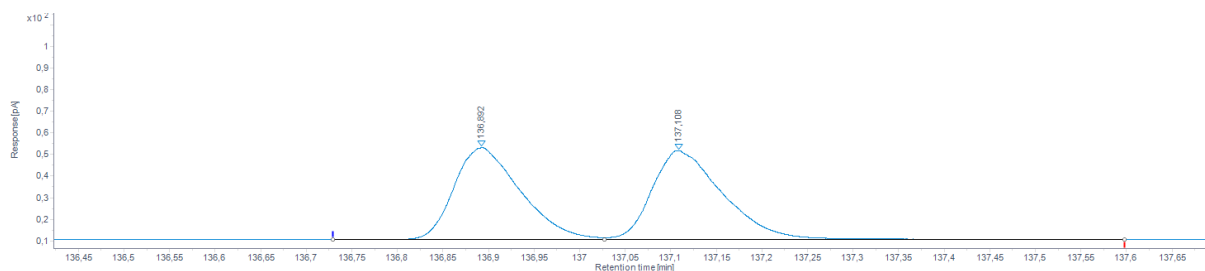

| # | Name | Signal description | RT (min) | Area    | Area%  | Height | Height% | Amount | Concentration | Start time (min) | End time (min) |
|---|------|--------------------|----------|---------|--------|--------|---------|--------|---------------|------------------|----------------|
| 1 |      | FID1A              | 136,892  | 215,627 | 49,190 | 42,592 | 50,84   |        |               | 136,729          | 137,027        |
| 2 |      | FID1A              | 137,108  | 222,729 | 50,810 | 41,188 | 49,16   |        |               | 137,027          | 137,598        |

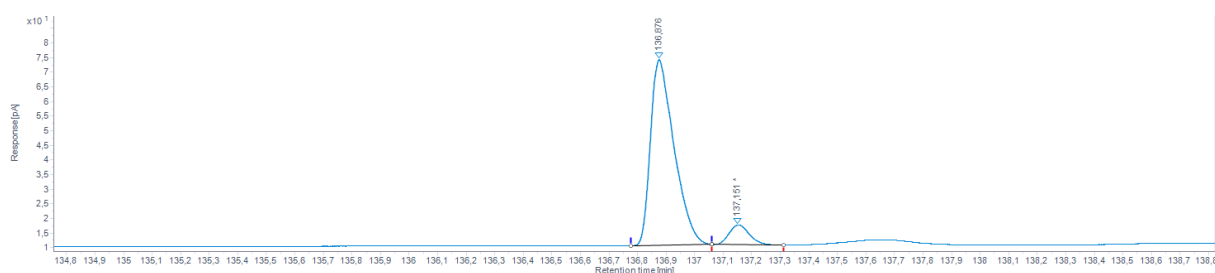

| # | Name | Signal description | RT (min) | Area    | Area%  | Height | Height% | Amount | Concentration | Start time (min) | End time (min) |
|---|------|--------------------|----------|---------|--------|--------|---------|--------|---------------|------------------|----------------|
| 1 |      | FID1A              | 136,876  | 402,548 | 93,262 | 64,945 | 91,18   |        |               | 136,772          | 137,071        |
| 2 |      | FID1A              | 137,151  | 29,082  | 6,738  | 6,285  | 8,82    |        |               | 137,090          | 137,288        |

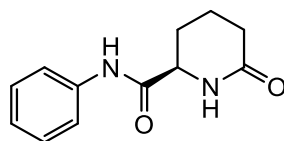

**(R)-6-Oxo-N-phenylpiperidine-2-carboxamide:** The title compound was prepared following the General Procedure using (*S*)-6-(4-benzyl-2-oxooxazolidin-3-yl)-*N*-phenylpicolinamide (112 mg, 0.30 mmol, 1.0 equiv.) The product was isolated after column chromatography (eluent: CH<sub>2</sub>Cl<sub>2</sub>, later CH<sub>2</sub>Cl<sub>2</sub>/MeOH 97:3, 95:5, 90:10) as white solid (40 mg, 0.19 mmol, 62%, 98:2 e.r.). The enantiomeric ratio of the product was determined after purification using HPLC Daicel CHIRALPAK IA-3, *n*-hexane:2-propanol = 90:10, flow rate = 1 mL/min, λ = 210 nm, retention time: 28.5 min (major), 36.5 min (minor).

**<sup>1</sup>H NMR** (400 MHz, Methanol-*d*<sub>4</sub>) 175.3, 172.5, 139.4, 129.8, 125.5, 121.5, 57.5, 31.8, 27.3, 19.7. **<sup>13</sup>C{<sup>1</sup>H}** **NMR** (101 MHz, Methanol-*d*<sub>4</sub>) 175.3, 172.5, 139.4, 129.8, 125.5, 121.5, 57.5, 31.8, 27.3, 19.7. **HRMS** (ESI) *m/z* calculated for [C<sub>12</sub>H<sub>14</sub>N<sub>2</sub>O<sub>2</sub>Na] ([M+Na<sup>+</sup>]) 241.0948, found, 241.0945.

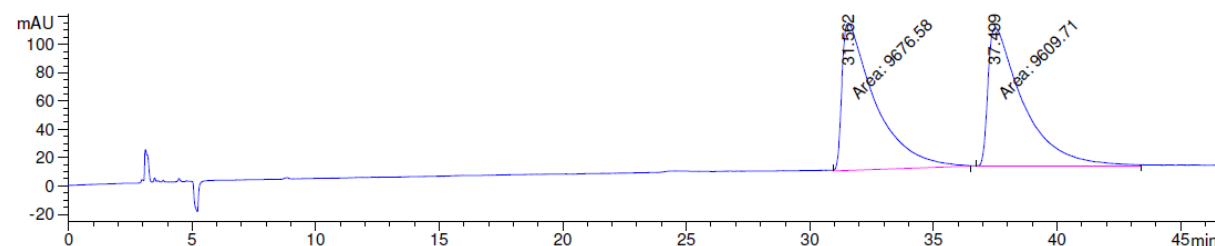

| Peak # | RetTime [min] | Type | Width [min] | Area [mAU*s] | Height [mAU] | Area %  |
|--------|---------------|------|-------------|--------------|--------------|---------|
| 1      | 31.562        | MM   | 1.5494      | 9676.57715   | 104.08638    | 50.1734 |
| 2      | 37.499        | MM   | 1.6449      | 9609.70508   | 97.36959     | 49.8266 |

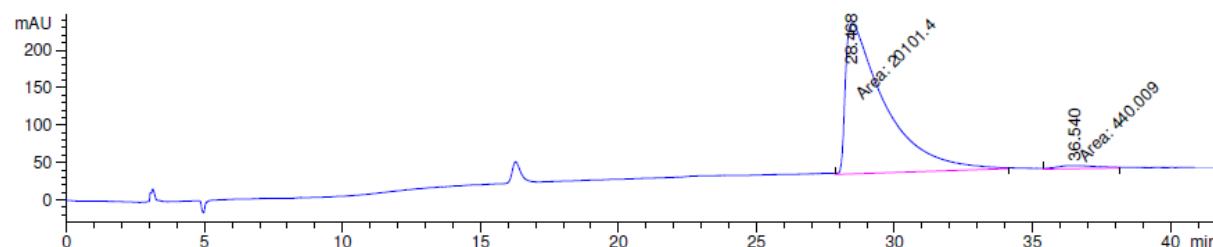

| Peak # | RetTime [min] | Type | Width [min] | Area [mAU*s] | Height [mAU] | Area %  |
|--------|---------------|------|-------------|--------------|--------------|---------|
| 1      | 28.468        | MM   | 1.6653      | 2.01014e4    | 201.17468    | 97.8579 |
| 2      | 36.540        | MM   | 1.7382      | 440.00916    | 4.21896      | 2.1421  |

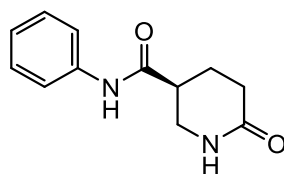

**(S)-6-Oxo-N-phenylpiperidine-3-carboxamide:** The title compound was prepared following the General Procedure using (S)-6-(4-benzyl-2-oxooxazolidin-3-yl)-N-phenylnicotinamide (112 mg, 0.30 mmol, 1.0 equiv.) The product was isolated after column chromatography (eluent: CH<sub>2</sub>Cl<sub>2</sub>, later CH<sub>2</sub>Cl<sub>2</sub>/MeOH 97:3, 95:5, 90:10) as white solid (54 mg, 0.25 mmol, 83%, 95:5 e.r.). The enantiomeric ratio of the product was determined after purification using HPLC Daicel CHIRALPAK OJ-H, *n*-hexane:2-propanol = 90:10, flow rate = 1 mL/min, λ = 210 nm, retention time: 22.6 min (major), 30.7 min (minor).

**<sup>1</sup>H NMR** (400 MHz, Methanol-*d*<sub>4</sub>) 7.55 (d, *J* = 7.6 Hz, 2H), 7.30 (t, *J* = 8.0 Hz, 2H), 7.09 (t, *J* = 7.4 Hz, 1H), 3.54 – 3.43 (m, 2H), 2.91 – 2.81 (m, 1H), 2.52 – 2.33 (m, 2H), 2.17 – 1.98 (m, 2H). **<sup>13</sup>C{<sup>1</sup>H} NMR** (101 MHz, Methanol-*d*<sub>4</sub>) 174.1, 173.4, 139.7, 129.8, 125.3, 121.3, 44.7, 41.7, 30.9, 25.6. **HRMS** (ESI) *m/z* calculated for [C<sub>12</sub>H<sub>14</sub>N<sub>2</sub>O<sub>2</sub>Na] ([M+Na<sup>+</sup>]) 241.0948, found, 241.0945.

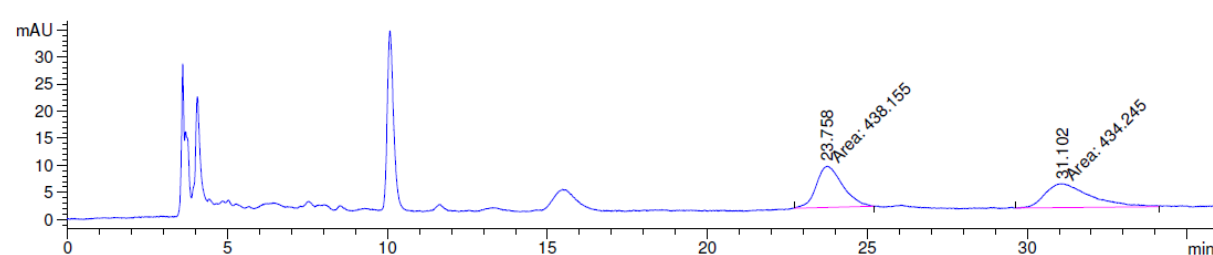

| Peak # | RetTime [min] | Type | Width [min] | Area [mAU*s] | Height [mAU] | Area %  |
|--------|---------------|------|-------------|--------------|--------------|---------|
| 1      | 23.758        | MM   | 0.9567      | 438.15472    | 7.63299      | 50.2241 |
| 2      | 31.102        | MM   | 1.6312      | 434.24542    | 4.43685      | 49.7759 |

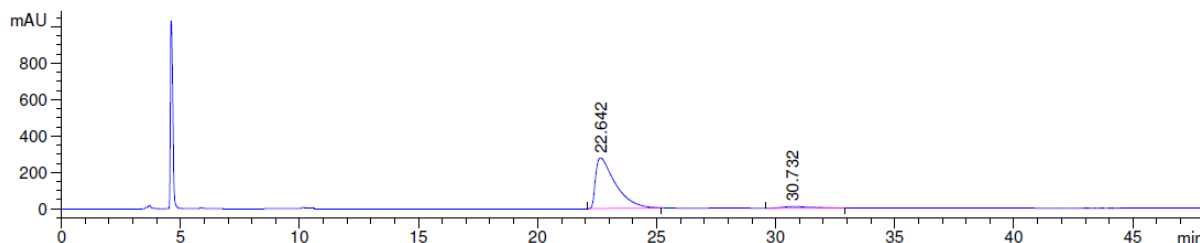

| Peak # | RetTime [min] | Type | Width [min] | Area [mAU*s] | Height [mAU] | Area %  |
|--------|---------------|------|-------------|--------------|--------------|---------|
| 1      | 22.642        | BB   | 0.7602      | 1.59574e4    | 277.80270    | 94.9515 |
| 2      | 30.732        | BB   | 0.9936      | 848.45166    | 10.01311     | 5.0485  |

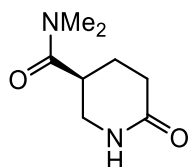

**(S)-N,N-Dimethyl-6-oxopiperidine-3-carboxamide:** The title compound was prepared following the General Procedure using (S)-6-(4-isopropyl-2-oxooxazolidin-3-yl)-N,N-dimethylnicotinamide (83 mg, 0.30 mmol, 1.0 equiv.) The product was isolated after column chromatography (eluent: CH<sub>2</sub>Cl<sub>2</sub>, later CH<sub>2</sub>Cl<sub>2</sub>/MeOH 99:1, 95:5, 90:10) as white solid (32 mg, 0.19 mmol, 63%, 92:8 e.r.). The enantiomeric ratio of the product was determined after purification using HPLC Daicel CHIRALPAK OJ-H, *n*-hexane:2-propanol = 80:20, flow rate = 1 mL/min, λ = 210 nm, retention time: 14.2min (major), 17.0 min (minor).

<sup>1</sup>H NMR (400 MHz, Chloroform-*d*) 6.41 (s, 1H), 3.61 – 3.52 (m, 1H), 3.37 – 3.29 (m, 1H), 3.08 (s, 3H), 3.01 – 2.89 (m, 4H), 2.56 – 2.47 (m, 1H), 2.43 – 2.32 (m, 1H), 2.06 – 1.95 (m, 2H). <sup>13</sup>C{<sup>1</sup>H} NMR (101 MHz, Chloroform-*d*) 172.1, 171.5, 44.2, 37.3, 36.6, 35.8, 30.6, 24.4. HRMS (ESI) *m/z* calculated for [C<sub>8</sub>H<sub>14</sub>N<sub>2</sub>O<sub>2</sub>Na] ([M+Na<sup>+</sup>]) 193.0948, found, 193.0944.

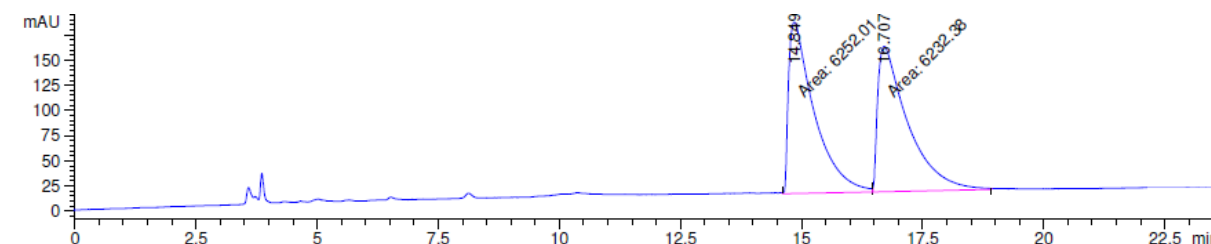

| Peak # | RetTime [min] | Type | Width [min] | Area [mAU*s] | Height [mAU] | Area %  |
|--------|---------------|------|-------------|--------------|--------------|---------|
| 1      | 14.849        | MF   | 0.6119      | 6252.00732   | 170.29579    | 50.0786 |
| 2      | 16.707        | FM   | 0.7195      | 6232.37842   | 144.37550    | 49.9214 |

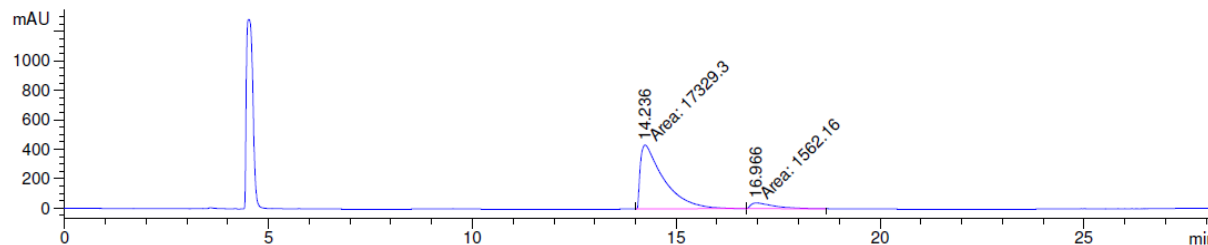

| Peak # | RetTime [min] | Type | Width [min] | Area [mAU*s] | Height [mAU] | Area %  |
|--------|---------------|------|-------------|--------------|--------------|---------|
| 1      | 14.236        | MM   | 0.6664      | 1.73293e4    | 433.37759    | 91.7309 |
| 2      | 16.966        | MM   | 0.6644      | 1562.16052   | 39.18980     | 8.2691  |

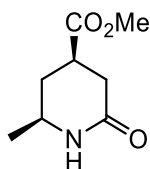

**Methyl (2S,4R)-2-methyl-6-oxopiperidine-4-carboxylate:** The title compound was prepared following the General Procedure using methyl 2-(4-benzyl-2-oxooxazolidin-3-yl)-6-methylisonicotinate (98 mg, 0.30 mmol, 1.0 equiv.) The product was isolated after column chromatography (eluent: CH<sub>2</sub>Cl<sub>2</sub>, later CH<sub>2</sub>Cl<sub>2</sub>/MeOH 99:1, 98:2, 97:3) as white solid (41 mg, 0.24 mmol, 80%, 97:3 e.r., >95:5 d.r.). The enantiomeric ratio of the product was determined after purification using gas chromatography (HYDRODEX β-6TBDM column, 25 m, 0.25 mm ID; carrier gas: H<sub>2</sub>; injection temperature 230 °C; oven temperature 50 °C, heating rate: 5 °C/min to 120 °C, then 1 °C/min to 220 °C).

<sup>1</sup>H NMR (400 MHz, Chloroform-*d*) 6.31 (s, 1H), 3.71 (s, 3H), 3.58 – 3.46 (m, 1H), 2.86 – 2.74 (m, 1H), 2.69 – 2.56 (m, 1H), 2.52 – 2.40 (m, 1H), 2.24 – 2.15 (m, 1H), 1.52 – 1.38 (m, 1H), 1.22 (d, *J* = 6.4 Hz, 3H). <sup>13</sup>C{<sup>1</sup>H} NMR (101 MHz, Chloroform-*d*) 173.8, 170.7, 52.3, 48.3, 38.3, 33.8, 33.2, 22.7. HRMS (ESI) *m/z* calculated for [C<sub>8</sub>H<sub>13</sub>NO<sub>3</sub>Na] ([M+Na<sup>+</sup>]) 194.0788, found 194.0785.

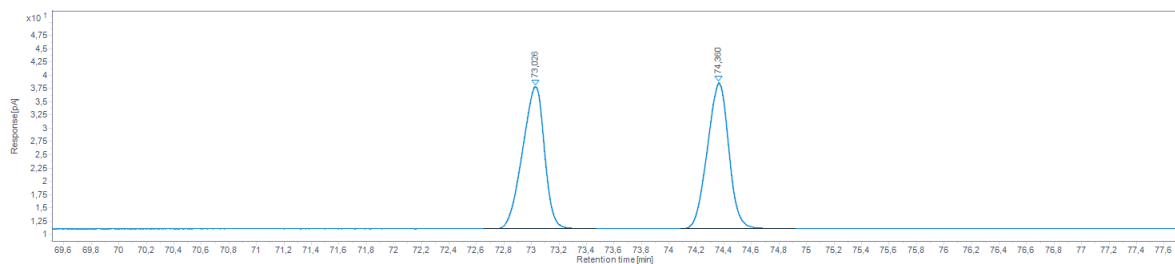

| # | Name | Signal description | RT (min) | Area    | Area%  | Height | Height% | Amount | Concentration | Start time (min) | End time (min) |
|---|------|--------------------|----------|---------|--------|--------|---------|--------|---------------|------------------|----------------|
| 1 |      | FID1A              | 72,264   | 282,615 | 50,073 | 60,771 | 43,51   |        |               | 72,111           | 72,542         |
| 2 |      | FID1A              | 72,739   | 281,791 | 49,927 | 78,908 | 56,49   |        |               | 72,615           | 72,963         |

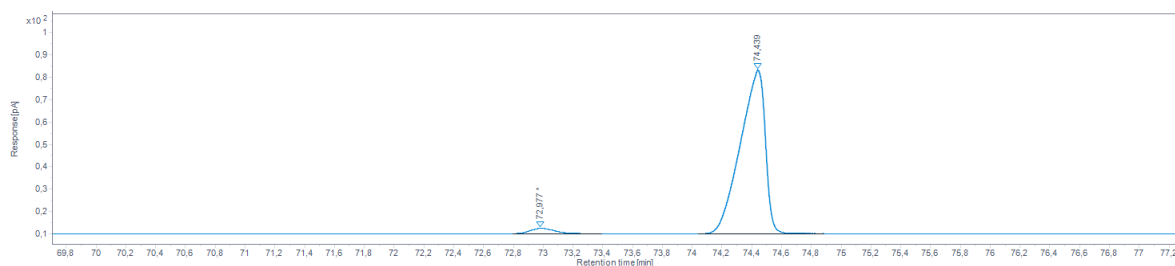

| # | Name | Signal description | RT (min) | Area    | Area%  | Height | Height% | Amount | Concentration | Start time (min) | End time (min) |
|---|------|--------------------|----------|---------|--------|--------|---------|--------|---------------|------------------|----------------|
| 1 |      | FID1A              | 72,977   | 26,180  | 2,989  | 2,332  | 3,09    |        |               | 72,799           | 73,393         |
| 2 |      | FID1A              | 74,439   | 849,855 | 97,011 | 73,157 | 96,91   |        |               | 74,040           | 74,883         |

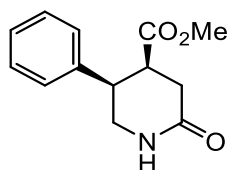

**Methyl (4*S*,5*R*)-2-oxo-5-phenylpiperidine-4-carboxylate:** The title compound was prepared following the General Procedure using methyl 2-(4-benzyl-2-oxooxazolidin-3-yl)-5-phenylisonicotinate (117 mg, 0.30 mmol, 1.0 equiv.) The product was isolated after column chromatography (eluent: CH<sub>2</sub>Cl<sub>2</sub>, later CH<sub>2</sub>Cl<sub>2</sub>/MeOH 99:1, 98:2, 97:3) as white solid (21 mg, 0.09 mmol, 30%, 89:11 e.r., >95:5 d.r.). The enantiomeric ratio of the product was determined after purification using gas chromatography (HYDRODEX β-6TBDM column, 25 m, 0.25 mm ID; carrier gas: H<sub>2</sub>; injection temperature 230 °C; oven temperature 50 °C, heating rate: 20 °C/min to 180 °C, then 1 °C/min to 220 °C and hold for 30 min).

**<sup>1</sup>H NMR** (400 MHz, Chloroform-*d*) 7.35 – 7.26 (m, 3H), 7.23 – 7.17 (m, 2H), 6.56 (s, 1H), 3.90 – 3.83 (m, 1H), 3.72 – 3.64 (m, 1H), 3.61 (s, 3H), 3.58 – 3.51 (m, 1H), 3.25 – 3.17 (m, 1H), 2.67 – 2.58 (m, 2H). **<sup>13</sup>C{<sup>1</sup>H} NMR** (101 MHz, Chloroform-*d*) 172.6, 170.7, 138.9, 128.9, 127.8, 127.6, 51.9, 45.1, 43.3, 39.7, 31.8. **HRMS** (ESI) *m/z* calculated for [C<sub>13</sub>H<sub>15</sub>NO<sub>3</sub>Na] ([M+Na<sup>+</sup>]) 256.0944, found 256.0941.

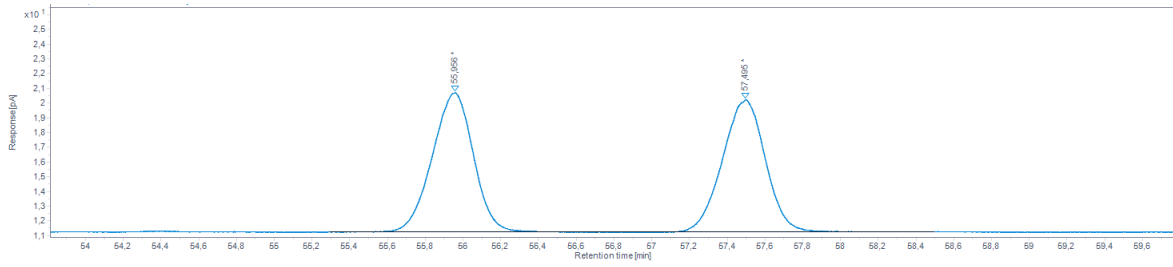

| # | Name | Signal description | RT (min) | Area    | Area%  | Height | Height% | Amount | Concentration | Start time (min) | End time (min) |
|---|------|--------------------|----------|---------|--------|--------|---------|--------|---------------|------------------|----------------|
| 1 |      | FID1A              | 55,956   | 142,968 | 50,227 | 9,441  | 51,22   |        |               | 55,297           | 56,705         |
| 2 |      | FID1A              | 57,495   | 141,673 | 49,773 | 8,990  | 48,78   |        |               | 56,705           | 58,495         |

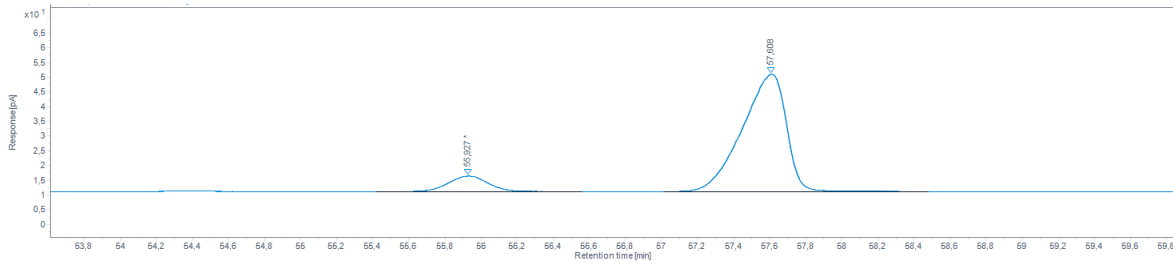

| # | Name | Signal description | RT (min) | Area    | Area%  | Height | Height% | Amount | Concentration | Start time (min) | End time (min) |
|---|------|--------------------|----------|---------|--------|--------|---------|--------|---------------|------------------|----------------|
| 1 |      | FID1A              | 55,927   | 80,653  | 10,632 | 5,269  | 11,64   |        |               | 55,414           | 56,559         |
| 2 |      | FID1A              | 57,608   | 677,939 | 89,368 | 39,992 | 88,36   |        |               | 57,013           | 58,480         |

## 6. Gram-Scale Hydrogenation and Hydrolytic Ring Opening of $\delta$ -Lactams

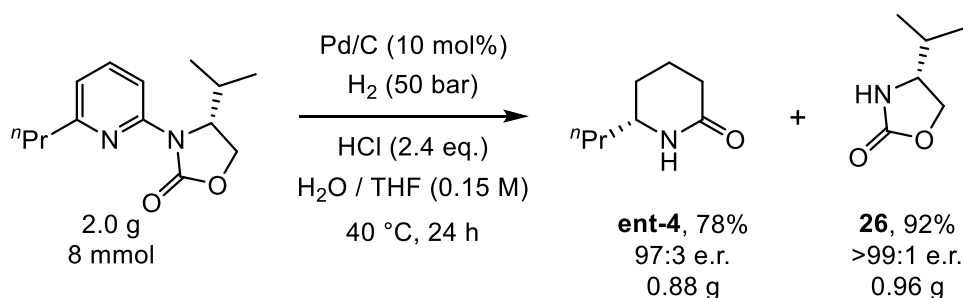

**Experimental Procedure:** The reaction was performed according to the general procedure from the previous chapter using (*R*)-4-isopropyl-3-(6-propylpyridin-2-yl)oxazolidin-2-one (2.00 g, 8.05 mmol, 1.0 equiv.), 5 wt% Pd/C (1.71 g, 0.805 mmol, 10 mol%), and aqueous HCl (1.61 ml, 19.32 mmol, 2.4 equiv., 12 M) in H<sub>2</sub>O (27 ml) and THF (27 ml). The crude mixture was purified using column chromatography (eluent: CH<sub>2</sub>Cl<sub>2</sub>, later CH<sub>2</sub>Cl<sub>2</sub>/MeOH 99:1, 98:2, 97:3) to give **ent-4** as white solid (884 mg, 6.26 mmol, 78%, 97:3 e.r.) and **26** as white solid (959 mg, 7.42 mmol, 92%, >99:1 e.r.). The enantiomeric ratio of **ent-4** was determined after purification using HPLC Daicel CHIRALPAK IA-3, *n*-hexane:2-propanol = 90:10, flow rate = 1 mL/min,  $\lambda$  = 210 nm, retention time: 52.0 min (major), 57.1 min (minor). The enantiomeric ratio of **26** was determined after purification using gas chromatography (HYDRODEX  $\beta$ -6TBDM column, 25 m, 0.25 mm ID; carrier gas: H<sub>2</sub>; injection temperature 230 °C; oven temperature 50 °C, heating rate: 0.5 °C/min to 220 °C).

Analytical data **ent-4**:

<sup>1</sup>H NMR (500 MHz, Chloroform-*d*) 5.85 (s, 1H), 3.39 – 3.30 (m, 1H), 2.43 – 2.33 (m, 1H), 2.32 – 2.22 (m, 1H), 1.93 – 1.84 (m, 2H), 1.73 – 1.62 (m, 1H), 1.48 – 1.40 (m, 2H), 1.40 – 1.28 (m, 3H), 0.93 (t, *J* = 7.2 Hz, 3H). <sup>13</sup>C{<sup>1</sup>H} NMR (126 MHz, Chloroform-*d*) 172.5, 53.1, 39.3, 31.5, 28.6, 20.0, 18.6, 14.0.

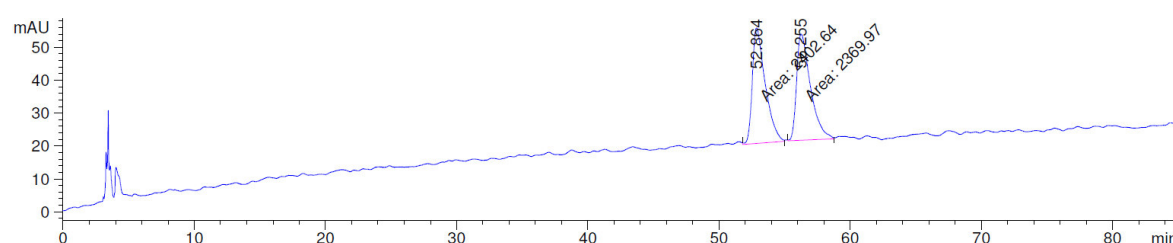

| Peak # | RetTime [min] | Type | Width [min] | Area [mAU*s] | Height [mAU] | Area %  |
|--------|---------------|------|-------------|--------------|--------------|---------|
| 1      | 52.864        | MM   | 1.1407      | 2402.63818   | 35.10623     | 50.3423 |
| 2      | 56.255        | MM   | 1.2262      | 2369.96851   | 32.21357     | 49.6577 |

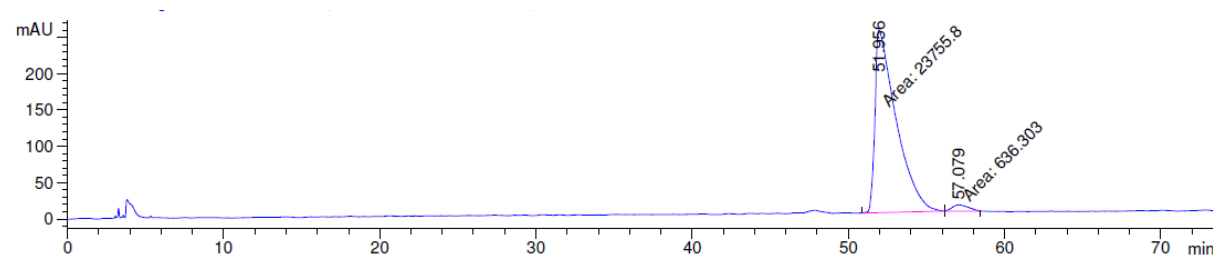

| Peak # | RetTime [min] | Type | Width [min] | Area [mAU*s] | Height [mAU] | Area %  |
|--------|---------------|------|-------------|--------------|--------------|---------|
| 1      | 51.956        | MM   | 1.5756      | 2.37558e4    | 251.28220    | 97.3914 |
| 2      | 57.079        | MM   | 1.2116      | 636.30286    | 8.75269      | 2.6086  |

Analytical data **26**:

<sup>1</sup>H NMR (400 MHz, Chloroform-*d*) 7.10 (s, 1H), 4.40 (t, *J* = 8.7 Hz, 1H), 4.06 (dd, *J* = 8.7, 6.3 Hz, 1H), 3.64 – 3.54 (m, 1H), 1.76 – 1.62 (m, *J* = 6.8 Hz, 1H), 0.93 (d, *J* = 6.8 Hz, 3H), 0.86 (d, *J* = 6.8 Hz, 3H).

<sup>13</sup>C{<sup>1</sup>H} NMR (101 MHz, Chloroform-*d*) 160.8, 68.7, 58.5, 32.8, 18.0, 17.7.

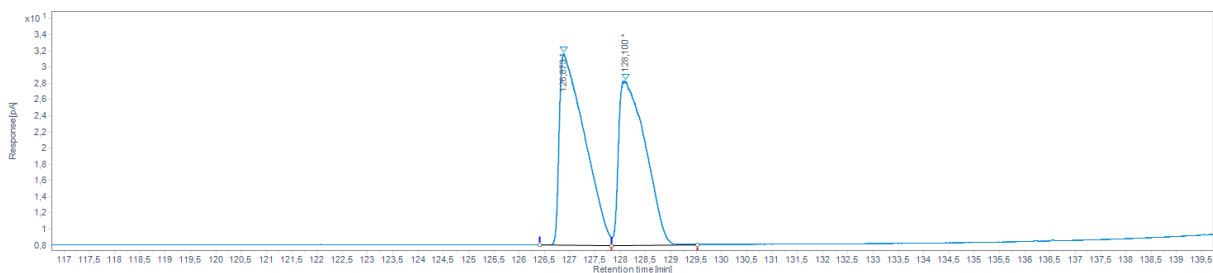

| # | Name | Signal description | RT (min) | Area    | Area%  | Height | Height% | Amount | Concentration | Start time (min) | End time (min) |
|---|------|--------------------|----------|---------|--------|--------|---------|--------|---------------|------------------|----------------|
| 1 |      | FID1A              | 126,873  | 818,902 | 52,453 | 23,601 | 53,79   |        |               | 126,409          | 127,833        |
| 2 |      | FID1A              | 128,100  | 742,319 | 47,547 | 20,272 | 46,21   |        |               | 127,833          | 129,519        |

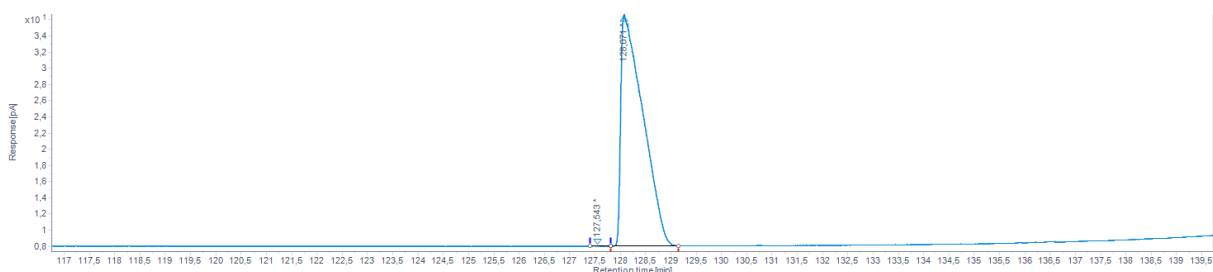

| # | Name | Signal description | RT (min) | Area    | Area%  | Height | Height% | Amount | Concentration | Start time (min) | End time (min) |
|---|------|--------------------|----------|---------|--------|--------|---------|--------|---------------|------------------|----------------|
| 1 |      | FID1A              | 127,543  | 0,079   | 0,009  | 0,015  | 0,05    |        |               | 127,393          | 127,817        |
| 2 |      | FID1A              | 128,071  | 869,621 | 99,991 | 28,578 | 99,95   |        |               | 127,817          | 129,156        |



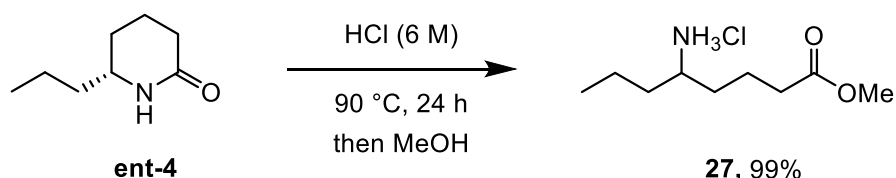

**Experimental Procedure:** The reaction was performed following a procedure from Zacharie and co-workers.<sup>[4]</sup> In a schlenk flask equipped with a stir bar,  $\delta$ -Lactam **ent-4** (141 mg, 1.0 mmol, 1.0 equiv.) was dissolved in 6 M HCl (10 ml, 0.1 M) and the mixture was stirred at 90 °C for 24 h. After having reached room temperature, hydrochloric acid was removed under reduced pressure. The oily residue was diluted in methanol and transferred to a 20 ml vial. The solvent was removed under reduced pressure and the product was dried under high vacuum to give amino acid methyl ester **28** (208 mg, 1.0 mmol, 99%, 97:3 e.r.) as white solid. The enantiomeric ratio of the product was determined after purification and deprotonation with  $\text{NEt}_3$  using gas chromatography (HYDRODEX  $\beta$ -6TBDM column, 25 m, 0.25 mm ID; carrier gas:  $\text{H}_2$ ; injection temperature 230 °C; oven temperature 50 °C, heating rate: 20 °C/min to 180 °C, then 1 °C/min to 220 °C).

**$^1\text{H NMR}$**  (400 MHz,  $\text{DMSO-}d_6$ ) 8.07 (s, 3H), 3.57 (s, 3H), 3.09 – 2.96 (m, 1H), 2.36 – 2.25 (m, 2H), 1.63 – 1.42 (m, 6H), 1.38 – 1.25 (m, 2H), 0.85 (t,  $J = 7.2$  Hz, 3H).  **$^{13}\text{C}\{^1\text{H}\}$  NMR** (101 MHz,  $\text{DMSO-}d_6$ ) 173.2, 51.4, 50.3, 34.1, 33.1, 31.3, 20.2, 17.9, 13.9. **HRMS** (ESI)  $m/z$  calculated for  $[\text{C}_9\text{H}_{20}\text{NO}_2]$  ( $[\text{M}+\text{H}^+]$ ) 174.1489, found 174.1487.

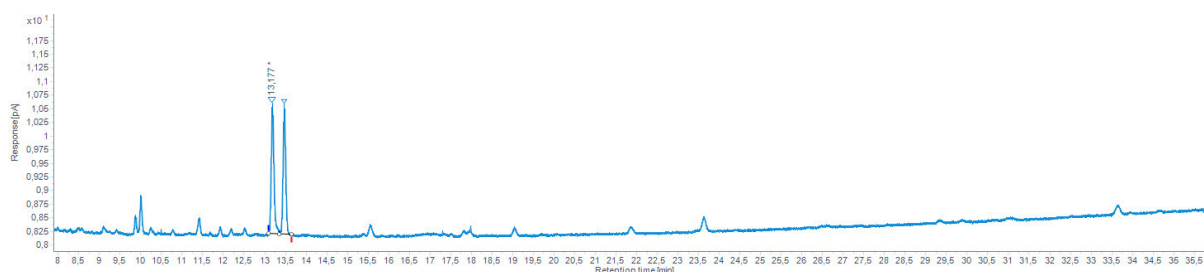

| # | Name | Signal description | RT (min) | Area  | Area%  | Height | Height% | Amount | Concentration | Start time (min) | End time (min) |
|---|------|--------------------|----------|-------|--------|--------|---------|--------|---------------|------------------|----------------|
| 1 |      | FID1A              | 13,177   | 9,789 | 50,339 | 2,339  | 50,02   |        |               | 13,100           | 13,287         |
| 2 |      | FID1A              | 13,463   | 9,657 | 49,661 | 2,338  | 49,98   |        |               | 13,383           | 13,659         |

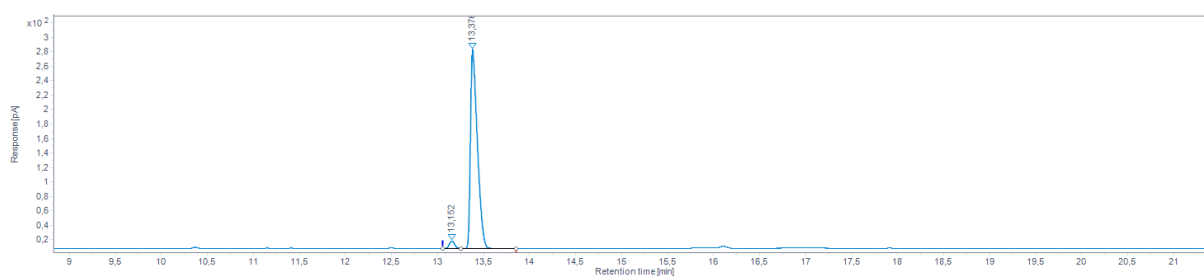

| # | Name | Signal description | RT (min) | Area     | Area%  | Height  | Height% | Amount | Concentration | Start time (min) | End time (min) |
|---|------|--------------------|----------|----------|--------|---------|---------|--------|---------------|------------------|----------------|
| 1 |      | FID1A              | 13,152   | 40,496   | 2,772  | 10,479  | 3,67    |        |               | 13,053           | 13,249         |
| 2 |      | FID1A              | 13,376   | 1420,395 | 97,228 | 274,721 | 96,33   |        |               | 13,249           | 13,850         |

## 7. Mechanistic Investigation

### Isolation of imine intermediate:

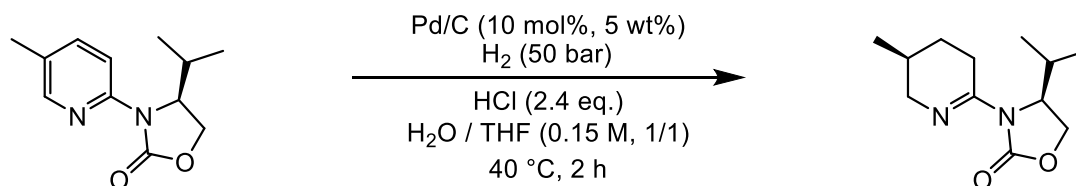

**Experimental Procedure:** A 60 ml glass vial equipped with a stir bar was charged with 5 wt% Pd/C (639 mg, 0.3 mmol, 10 mol%) and (*S*)-4-isopropyl-3-(5-methylpyridin-2-yl)oxazolidin-2-one (661 mg, 3.0 mmol, 1.0 equiv.). THF (10 ml) and H<sub>2</sub>O (10 ml) were added (20 ml / 0.15 M in total) followed by the addition of concentrated aqueous HCl (0.60 ml, 2.4 equiv.). The glass vial was placed in a 150 ml stainless steel autoclave under air. The autoclave was pressurized and depressurized four times with hydrogen gas before the final hydrogen pressure was set to 50 bar. The reaction mixture was stirred at 40 °C for 2 h. After the autoclave was carefully depressurized, Na<sub>2</sub>CO<sub>3</sub> (1.27 g, 4.0 equiv.) was added and the mixture was filtered over celite using CH<sub>2</sub>Cl<sub>2</sub>. The solvent was removed *in vacuo* and the product was isolated after column chromatography on silica gel (eluent: *n*-pentane/EtOAc 4:1) as white solid (36 mg, 0.16 mmol, 5%).

**<sup>1</sup>H NMR** (400 MHz, Chloroform-*d*) 4.48 (dt, *J* = 8.5, 3.6 Hz, 1H), 4.28 – 4.11 (m, 2H), 3.75 – 3.64 (m, 1H), 3.25 – 3.15 (m, 1H), 3.06 – 2.93 (m, 1H), 2.60 – 2.42 (m, 2H), 1.90 – 1.79 (m, 1H), 1.69 – 1.55 (m, 1H), 1.35 – 1.21 (m, 2H), 0.94 (d, *J* = 6.6 Hz, 3H), 0.87 (d, *J* = 7.1 Hz, 3H), 0.83 (d, *J* = 7.0 Hz, 3H). **<sup>13</sup>C{<sup>1</sup>H} NMR** (101 MHz, Chloroform-*d*) 155.6, 154.5, 62.9, 59.3, 55.3, 28.1, 27.5, 27.2, 26.3, 18.9, 18.2, 14.6. **HRMS** (ESI) *m/z* calculated for [C<sub>12</sub>H<sub>20</sub>N<sub>2</sub>O<sub>2</sub>Na] ([M+Na<sup>+</sup>]) 247.1417, found 247.1416.

### Hydrolysis of imine intermediate:

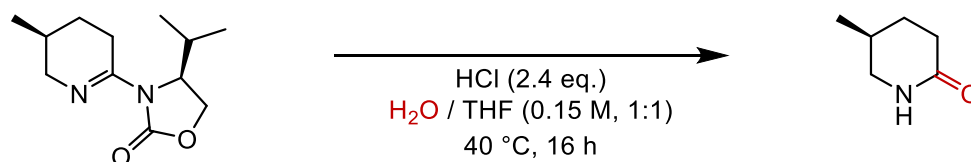

**Experimental Procedure:** A 4 mL glass vial (screw cap) equipped with a stir bar was charged with (*S*)-4-isopropyl-3-((*S*)-5-methyl-3,4,5,6-tetrahydropyridin-2-yl)oxazolidin-2-one (34 mg, 0.15 mmol, 1.0 equiv.). THF (0.5 ml) and H<sub>2</sub>O (0.5 ml) were added (1.0 ml / 0.15 M in total) followed by the addition of concentrated aqueous HCl (30 μl, 2.4 equiv.). The reaction mixture was stirred at 40 °C for 2 h. Na<sub>2</sub>CO<sub>3</sub> (64 mg, 4.0 equiv.) was added and the mixture was filtered over celite using CH<sub>2</sub>Cl<sub>2</sub>. The solvent was removed *in vacuo* and the product was isolated after

column chromatography on silica gel (eluent: CH<sub>2</sub>Cl<sub>2</sub>/MeOH 98:2) as colourless liquid (16 mg, 0.14 mmol, 94%, 98:2 e.r.). The enantiomeric ratio of the product was determined after purification using HPLC Daicel CHIRALPAK IA-3, *n*-hexane:2-propanol = 97:3, flow rate = 1 mL/min, λ = 210 nm, retention time: 43.7 min (major), 48.5 min (minor).

<sup>1</sup>H NMR (400 MHz, Chloroform-*d*) 6.40 (s, 1H), 3.33 – 3.23 (m, 1H), 2.96 – 2.84 (m, 1H), 2.47 – 2.26 (m, 2H), 1.98 – 1.78 (m, 2H), 1.54 – 1.39 (m, 1H), 1.00 (d, *J* = 6.6 Hz, 3H). <sup>13</sup>C{<sup>1</sup>H} NMR (101 MHz, Chloroform-*d*) 172.5, 49.3, 30.9, 29.2, 28.3, 18.5.

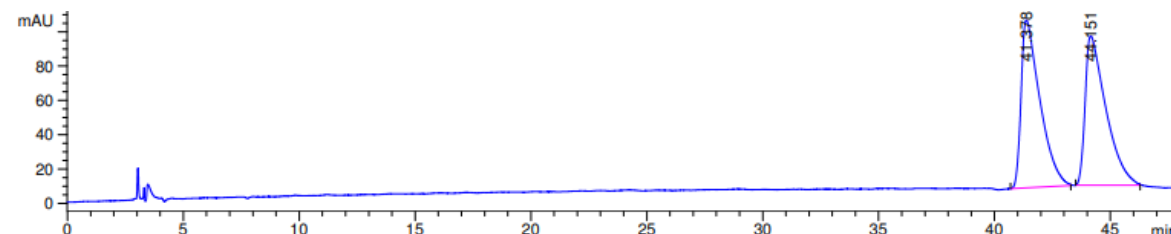

| Peak # | RetTime [min] | Type | Width [min] | Area [mAU*s] | Height [mAU] | Area %  |
|--------|---------------|------|-------------|--------------|--------------|---------|
| 1      | 41.378        | BB   | 0.7286      | 5521.03076   | 97.80560     | 50.5098 |
| 2      | 44.151        | BB   | 0.7318      | 5409.58691   | 87.07893     | 49.4902 |

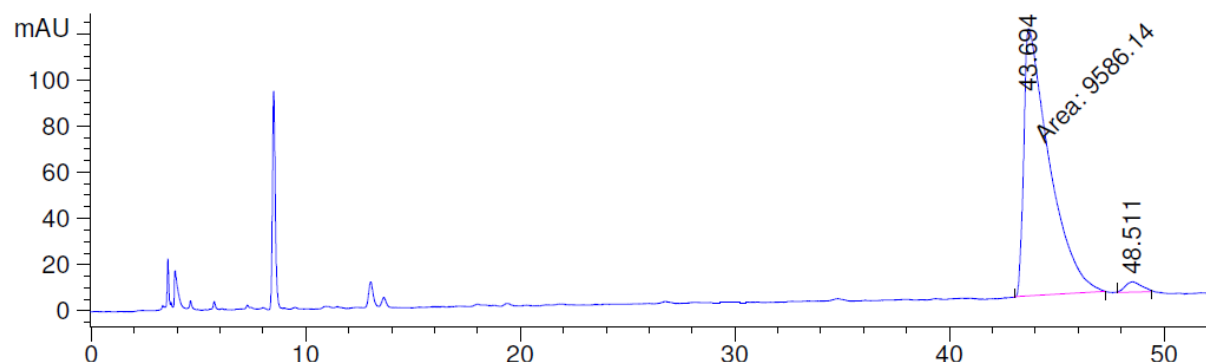

| Peak # | RetTime [min] | Type | Width [min] | Area [mAU*s] | Height [mAU] | Area %  |
|--------|---------------|------|-------------|--------------|--------------|---------|
| 1      | 43.694        | MM   | 1.3794      | 9586.13574   | 115.82081    | 97.5784 |
| 2      | 48.511        | BB   | 0.6324      | 237.89856    | 4.44477      | 2.4216  |

## Deuteration experiment:

A 4 ml glass vial (screw-cap) equipped with a stir bar was charged with 5 wt% Pd/C (32 mg, 0.015 mmol, 10 mol%) and (S)-4-isopropyl-3-(5-methylpyridin-2-yl)oxazolidin-2-one (0.15 mmol, 33 mg, 1.0 equiv). THF (0.5 mL) and D<sub>2</sub>O (0.5 mL) were added (1 mL / 0.15 M in total) followed by the addition of DCI in D<sub>2</sub>O (30  $\mu$ l, 35 wt%, 2.4 equiv). The glass vial was placed in a 150 ml stainless steel autoclave under air. The autoclave was pressurized and depressurized four times with deuterium gas before the final hydrogen pressure was set to 30 bar. The reaction mixture was stirred at 40 °C for 24 h. After the autoclave was carefully depressurized, Na<sub>2</sub>CO<sub>3</sub> (63 mg, 4.0 equiv) was added and the mixture was filtered over celite using CH<sub>2</sub>Cl<sub>2</sub>. The solvent was removed *in vacuo* and the product was purified using column chromatography on silica gel and analyzed by <sup>1</sup>H and <sup>2</sup>H NMR spectroscopy.

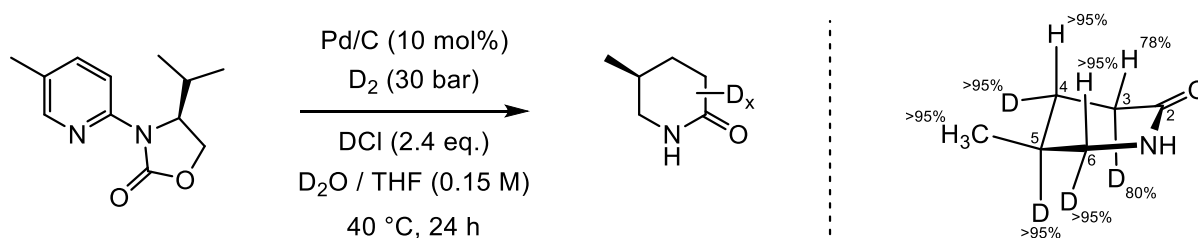

Figure S2: Deuteration experiment and product analysis. Note: Deuterium on the nitrogen is exchanged during silica gel work-up.

Based on the Horiuti-Polanyi mechanism,<sup>[5]</sup> hydrogen is added exclusively to the metal surface coordinating side of a  $\pi$ -bond in a heterogeneous hydrogenation. In the case of arene hydrogenation, the reduction of each double bond occurs iteratively and mainly from one side (Scheme S1). This deuteration experiment confirms a selective addition of deuterium to only one face of the pyridine. Positions 4–6 of the lactam product exhibit deuterium and hydrogen, respectively, with >95% selectivity (Figure S2). The 3-position of the lactam exhibits diminished selectivity for deuterium in the pseudo-axial position (80%) and hydrogen in the pseudo-equatorial position (20%). This may be due to tautomerization of the imine intermediate to the corresponding enamine (Figure S3).

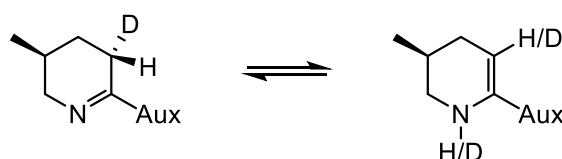

Figure S3: Tautomerization of the imine intermediate.

a)

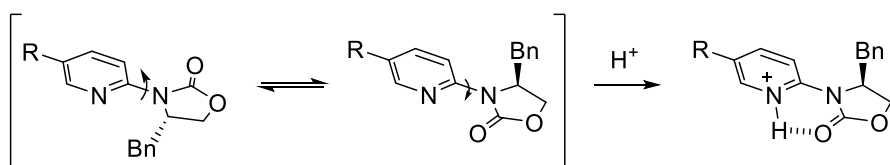

b)

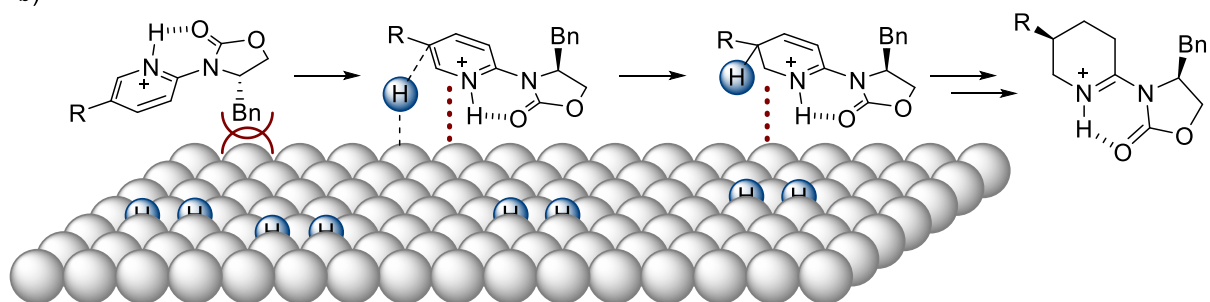

Scheme S1: a) Formation of a rigid conformer upon protonation. b) Diastereoselective addition of hydrogen to the non-hindered diastereotopic face of the pyridine substrate.

## 8. X-Ray Data

**X-Ray diffraction:** Data sets for compounds **1** and **10** were collected with a Bruker D8 Venture PHOTON III diffractometer. Programs used: data collection: APEX3 V2016.1-0<sup>[6]</sup> (Bruker AXS Inc., **2016**); cell refinement: SAINT V8.37A<sup>[7]</sup> (Bruker AXS Inc., **2015**); data reduction: SAINT V8.37A<sup>[7]</sup> (Bruker AXS Inc., **2015**); absorption correction, SADABS V2014/7<sup>[8]</sup> (Bruker AXS Inc., **2014**); structure solution *SHELXT-2015*<sup>[9]</sup>; structure refinement *SHELXL-2015*<sup>[10]</sup> and graphics, *XP*<sup>[11]</sup> (Version 5.1, Bruker AXS Inc., Madison, Wisconsin, USA, **1998**). *R*-values are given for observed reflections, and *wR*<sup>2</sup> values are given for all reflections.

**X-ray crystal structure analysis of 1:** A colorless plate-like specimen of C<sub>6</sub>H<sub>11</sub>NO, approximate dimensions 0.065 mm x 0.100 mm x 0.154 mm, was used for the X-ray crystallographic analysis. The X-ray intensity data were measured on a Bruker D8 Venture PHOTON III Diffractometer system equipped with a micro focus tube Cu K $\alpha$  (CuK $\alpha$ ,  $\lambda$  = 1.54178 Å) and a MX mirror monochromator. A total of 954 frames were collected. The total exposure time was 13.22 hours. The frames were integrated with the Bruker SAINT software package using a wide-frame algorithm. The integration of the data using an orthorhombic unit cell yielded a total of 5232 reflections to a maximum  $\theta$  angle of 68.28° (0.83 Å resolution), of which 1160 were independent (average redundancy 4.510, completeness = 98.4%,  $R_{\text{int}}$  = 3.01%,  $R_{\text{sig}}$  = 2.48%) and 1127 (97.16%) were greater than  $2\sigma(F^2)$ . The final cell constants of  $a$  = 7.6609(2) Å,  $b$  = 9.1064(2) Å,  $c$  = 9.1822(2) Å, volume = 640.58(3) Å<sup>3</sup>, are based upon the refinement of the XYZ-centroids of 3922 reflections above  $20\sigma(I)$  with  $15.06^\circ < 2\theta < 136.5^\circ$ . Data were corrected for absorption effects using the Multi-Scan method (SADABS). The ratio of minimum to maximum apparent transmission was 0.907. The calculated minimum and maximum transmission coefficients (based on crystal size) are 0.9080 and 0.9600. The structure was solved and refined using the Bruker SHELXTL Software Package, using the space group  $P2_12_12_1$ , with  $Z = 4$  for the formula unit, C<sub>6</sub>H<sub>11</sub>NO. The final anisotropic full-matrix least-squares refinement on  $F^2$  with 78 variables converged at  $R1 = 2.46\%$ , for the observed data and  $wR2 = 6.56\%$  for all data. The goodness-of-fit was 1.064. The largest peak in the final difference electron density synthesis was 0.116 e<sup>-</sup>/Å<sup>3</sup> and the largest hole was -0.100 e<sup>-</sup>/Å<sup>3</sup> with an RMS deviation of 0.024 e<sup>-</sup>/Å<sup>3</sup>. On the basis of the final model, the calculated density was 1.173 g/cm<sup>3</sup> and  $F(000)$ , 248 e<sup>-</sup>. Flack parameter was refined to -0.07(10). Hydrogen at N1 atom was refined freely. CCDC Nr.: 2043968.

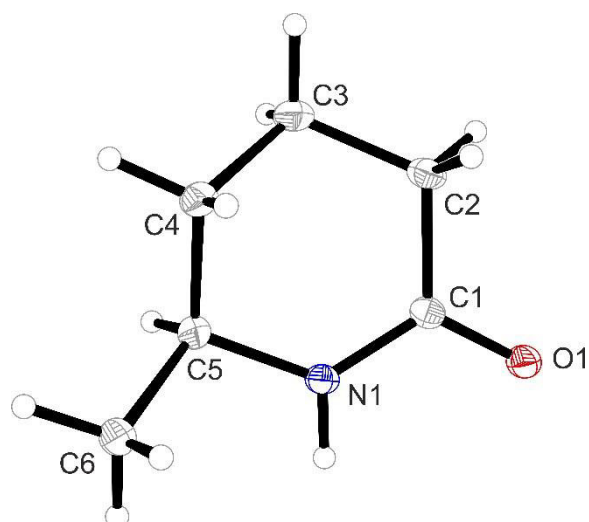

Figure S4: Crystal structure of compound 1. Thermal ellipsoids are shown at 30% probability.

**X-ray crystal structure analysis of 10:** A colorless prism-like specimen of  $C_6H_8F_3NO$ , approximate dimensions 0.039 mm x 0.047 mm x 0.071 mm, was used for the X-ray crystallographic analysis. The X-ray intensity data were measured on a Bruker D8 Venture PHOTON III Diffractometer system equipped with a micro focus tube Cu K $\alpha$  ( $\lambda = 1.54178 \text{ \AA}$ ) and a MX mirror monochromator. A total of 926 frames were collected. The total exposure time was 15.33 hours. The frames were integrated with the Bruker SAINT software package using a wide-frame algorithm. The integration of the data using an orthorhombic unit cell yielded a total of 6121 reflections to a maximum  $\theta$  angle of  $68.24^\circ$  ( $0.83 \text{ \AA}$  resolution), of which 1279 were independent (average redundancy 4.786, completeness = 99.0%,  $R_{int} = 5.74\%$ ,  $R_{sig} = 4.16\%$ ) and 1120 (87.57%) were greater than  $2\sigma(F^2)$ . The final cell constants of  $a = 6.8779(2) \text{ \AA}$ ,  $b = 10.0589(3) \text{ \AA}$ ,  $c = 10.2256(3) \text{ \AA}$ , volume =  $707.45(4) \text{ \AA}^3$ , are based upon the refinement of the XYZ-centroids of 2113 reflections above  $20 \sigma(I)$  with  $12.34^\circ < 2\theta < 136.4^\circ$ . Data were corrected for absorption effects using the Multi-Scan method (SADABS). The ratio of minimum to maximum apparent transmission was 0.895. The calculated minimum and maximum transmission coefficients (based on crystal size) are 0.9060 and 0.9470. The structure was solved and refined using the Bruker SHELXTL Software Package, using the space group  $P2_12_12_1$ , with  $Z = 4$  for the formula unit,  $C_6H_8F_3NO$ . The final anisotropic full-matrix least-squares refinement on  $F^2$  with 104 variables converged at  $R1 = 3.05\%$ , for the observed data and  $wR2 = 6.74\%$  for all data. The goodness-of-fit was 1.051. The largest peak in the final difference electron density synthesis was  $0.168 \text{ e}/\text{\AA}^3$  and the largest hole was  $-0.159 \text{ e}/\text{\AA}^3$  with an RMS deviation of  $0.041 \text{ e}/\text{\AA}^3$ . On the basis of the final model, the calculated density was  $1.569 \text{ g/cm}^3$  and  $F(000)$ , 344 e $^-$ . Flack parameter was refined to  $-0.10(14)$ . Hydrogen at N1 atom was refined freely. CCDC Nr.: 2043969.

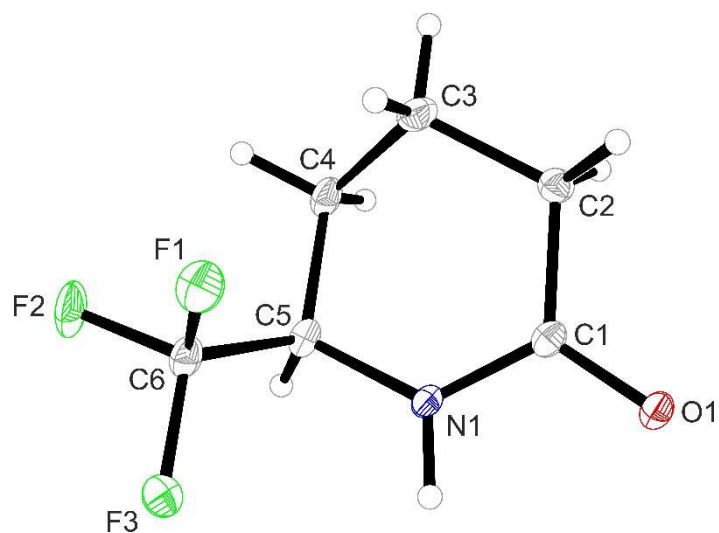

Figure S5: Crystal structure of compound 10. Thermal ellipsoids are shown at 30% probability.



## 9. Literature

- [1] A. Klapars, X. Huang, S. L. Buchwald, *J. Am. Chem. Soc.* **2002**, *124*, 7421–7428.
- [2] B. Latli, K. D'Amour, J. E. Casida, *J. Med. Chem.* **1999**, *42*, 2227–2234.
- [3] L. Pitzer, F. Schäfers, F. Glorius, *Angew. Chem. Int. Ed.* **2019**, *58*, 8572–8576.
- [4] B. Zacharie, S. D. Abbott, C. B. Baigent, C. Doyle, R. S. Yalagala, *Eur. J. Org. Chem.* **2018**, 6486–6493.
- [5] I. Horiuti, M. Polanyi, *Trans. Faraday Soc.* **1934**, *30*, 1164–1172.
- [6] APEX3 (2016), Bruker AXS Inc., Madison, Wisconsin, USA.
- [7] SAINT (2015), Bruker AXS Inc., Madison, Wisconsin, USA.
- [8] SADABS (2015), Bruker AXS Inc., Madison, Wisconsin, USA.
- [9] G. M. Sheldrick, *Acta. Cryst.* **2015**, *C71*, 3–8.
- [10] G. M. Sheldrick, *Acta. Cryst.* **2015**, *A71*, 3–8.
- [11] XP – Interactive molecular graphics, Version 5.1, Bruker AXS Inc., Madison, Wisconsin, USA, 1998.

## 10. NMR Data

$^1\text{H}$  NMR(400 MHz, Chloroform)

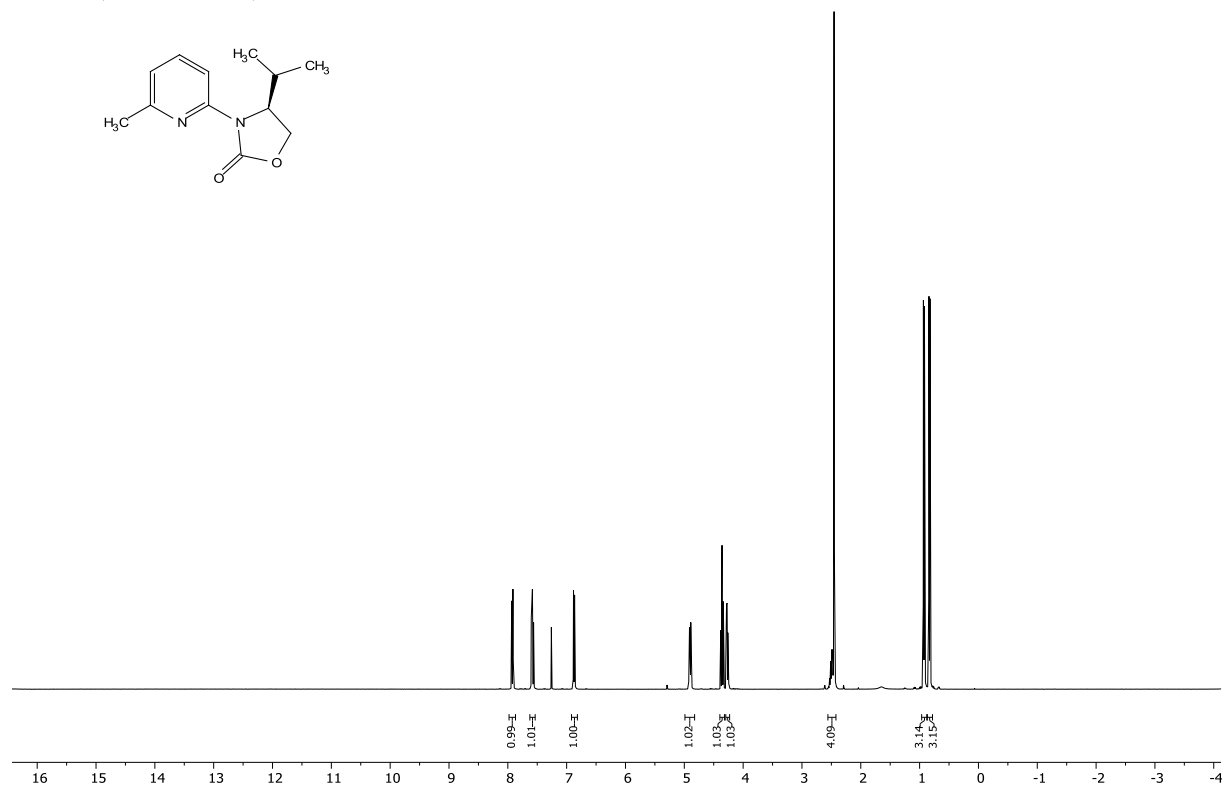

$^{13}\text{C}\{^1\text{H}\}$  NMR(101 MHz, Chloroform)

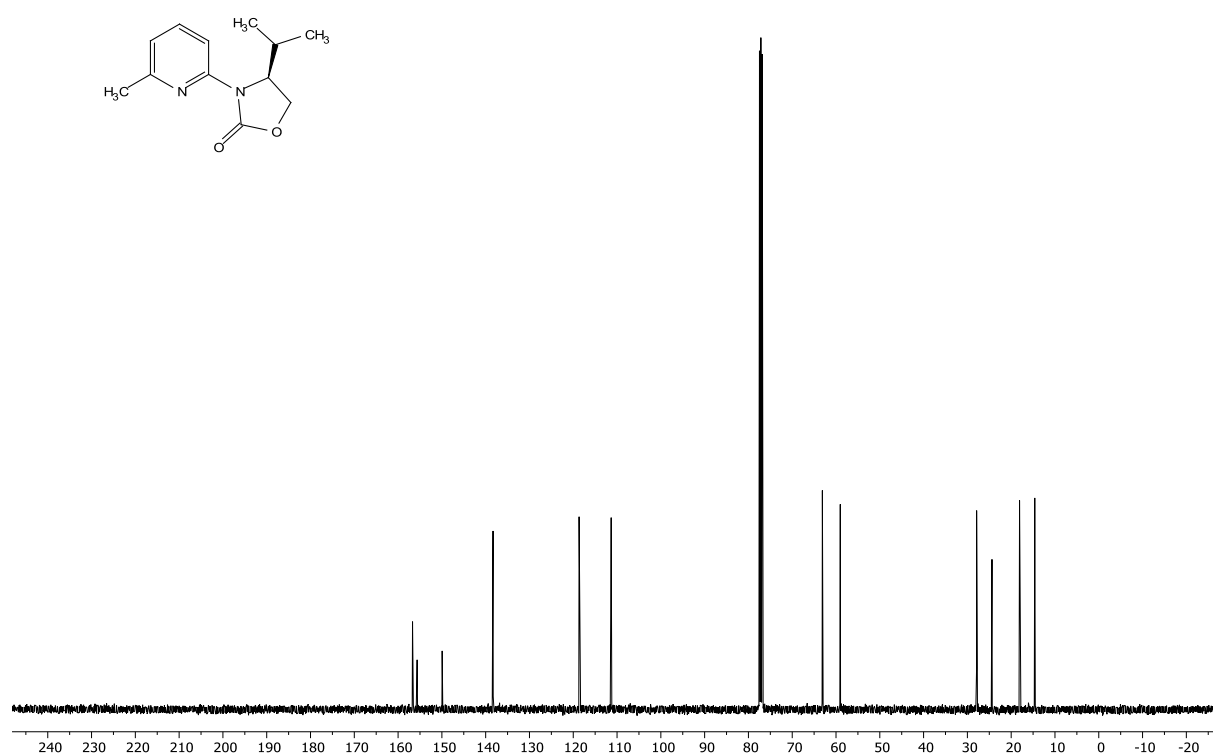

<sup>1</sup>H NMR(400 MHz, Chloroform-d)

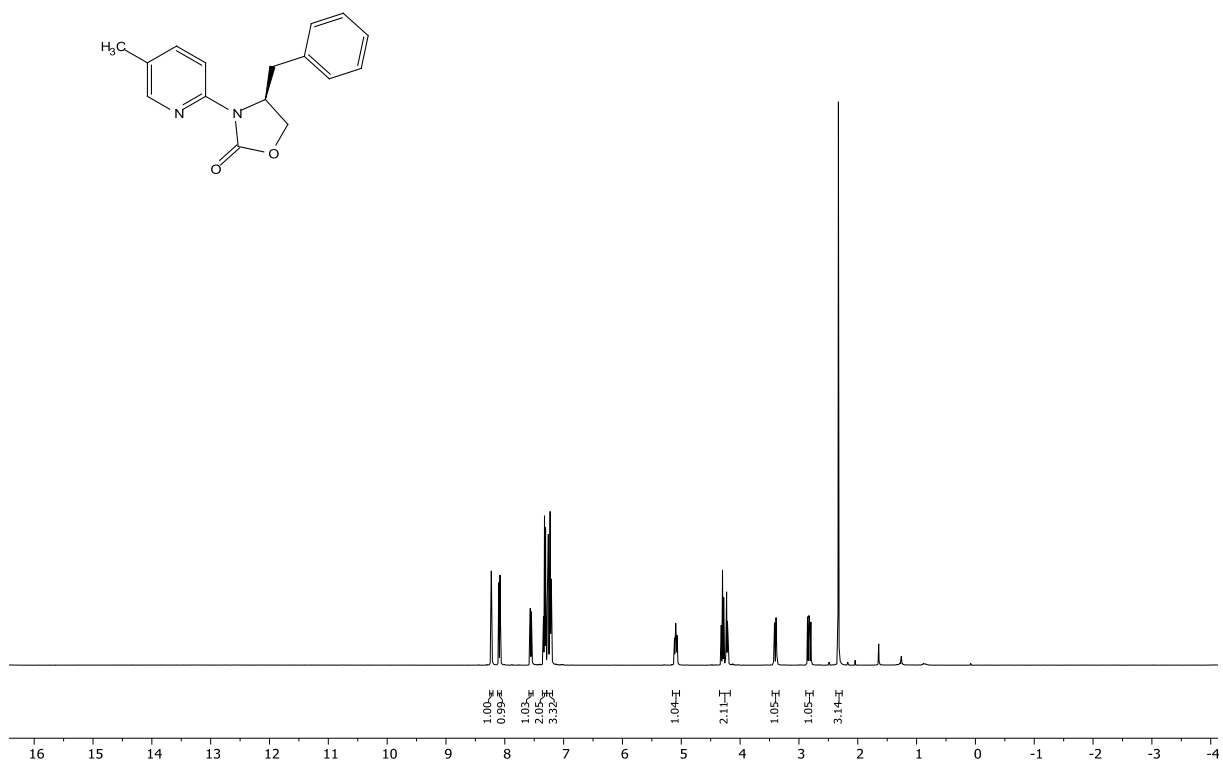

<sup>13</sup>C{<sup>1</sup>H} NMR(101 MHz, Chloroform-d)

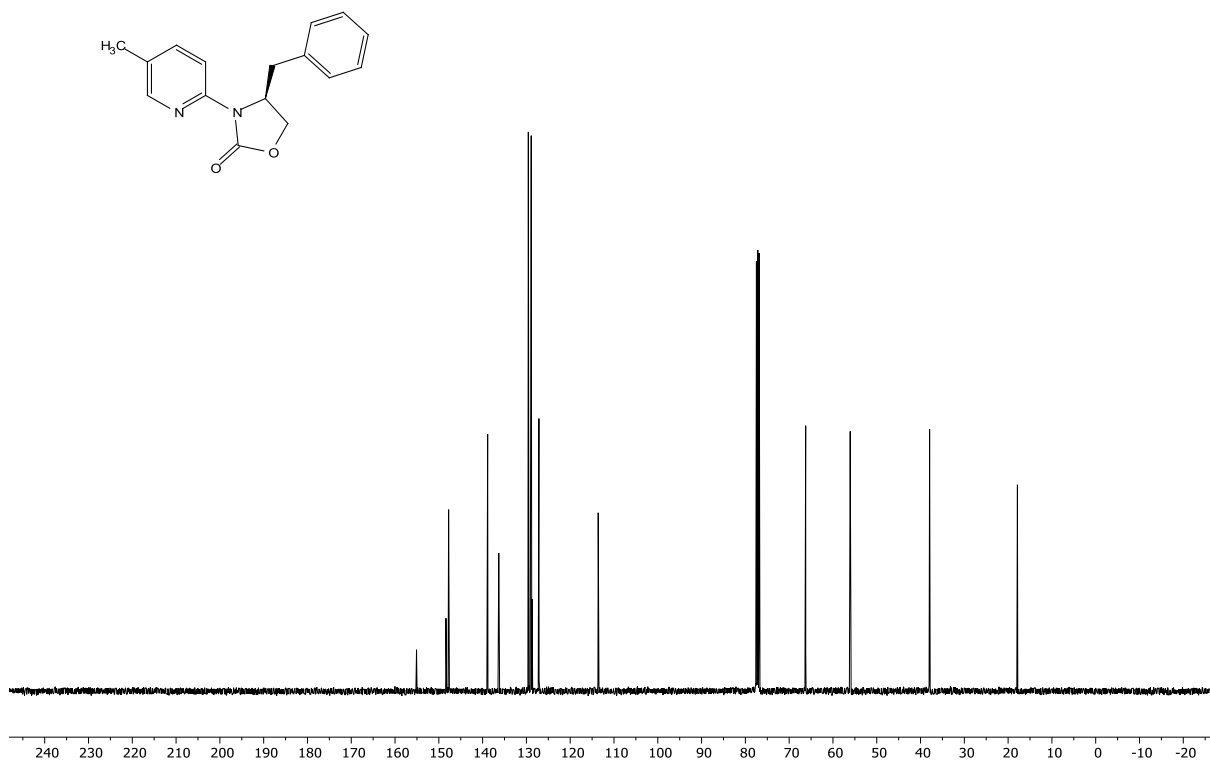

<sup>1</sup>H NMR(400 MHz, Chloroform)

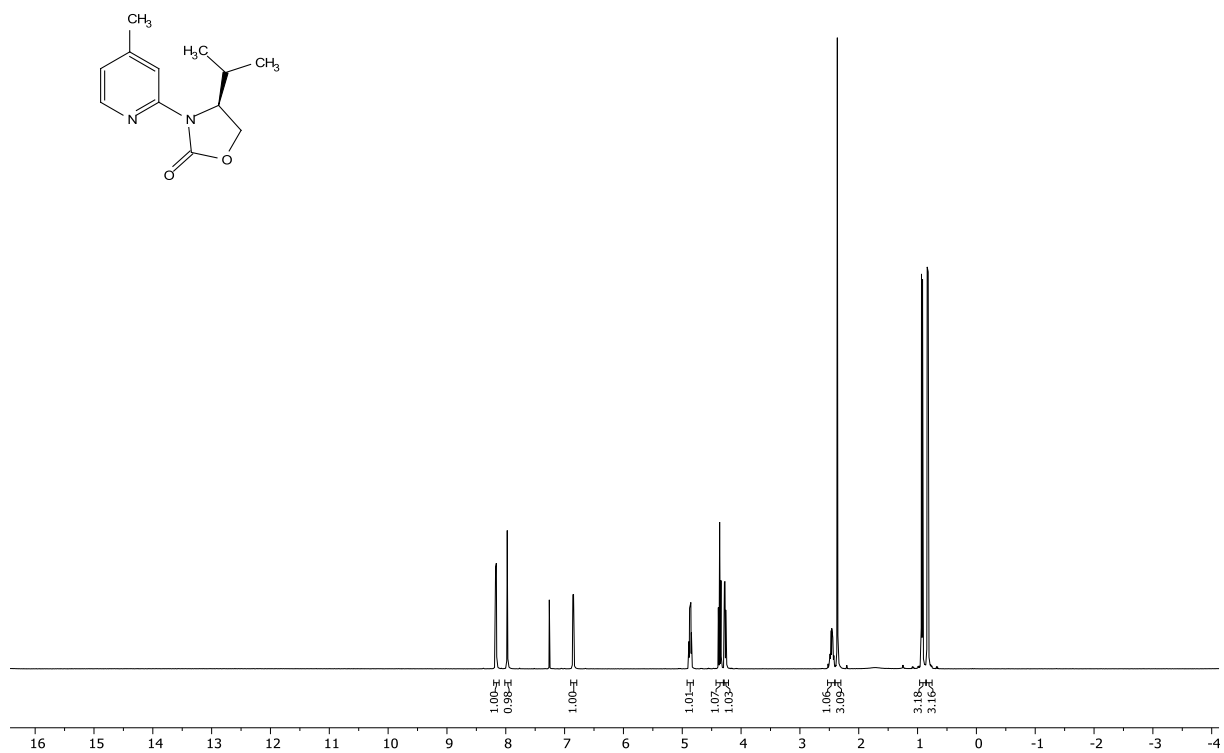

<sup>13</sup>C{<sup>1</sup>H} NMR(101 MHz, Chloroform)

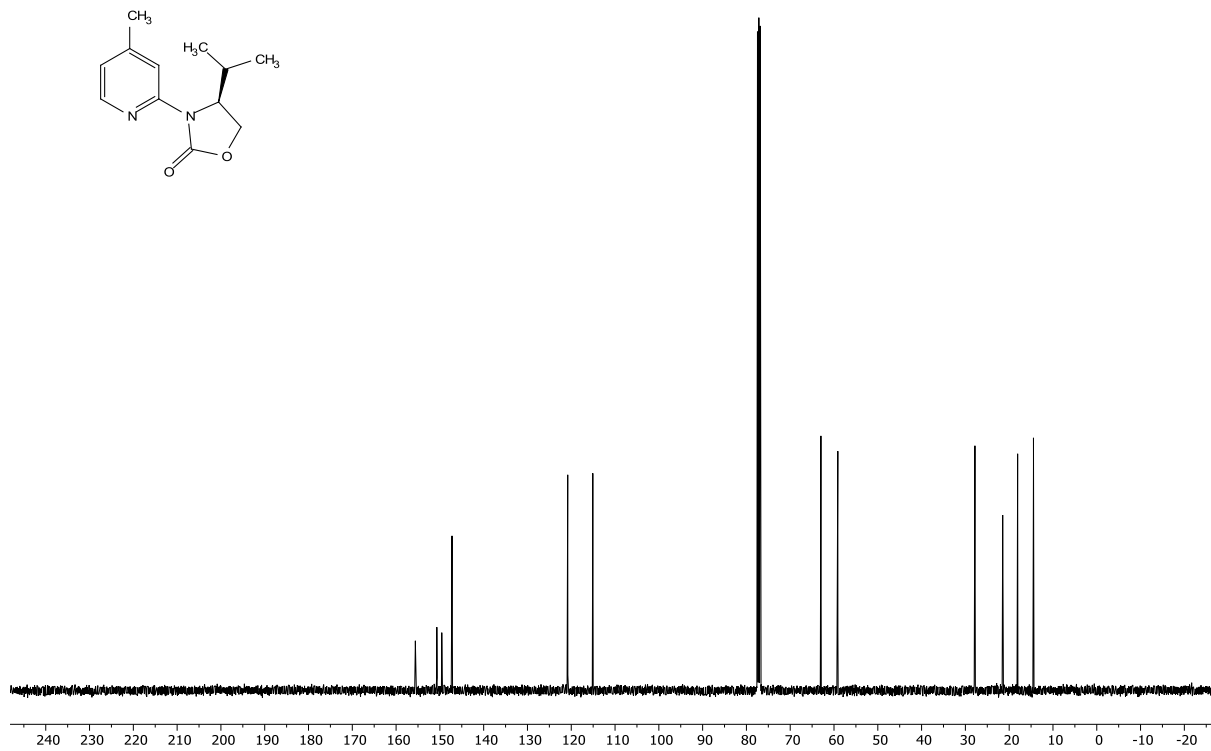

$^1\text{H}$  NMR(400 MHz, Chloroform)

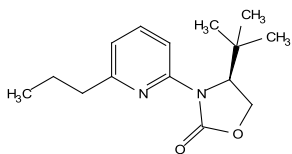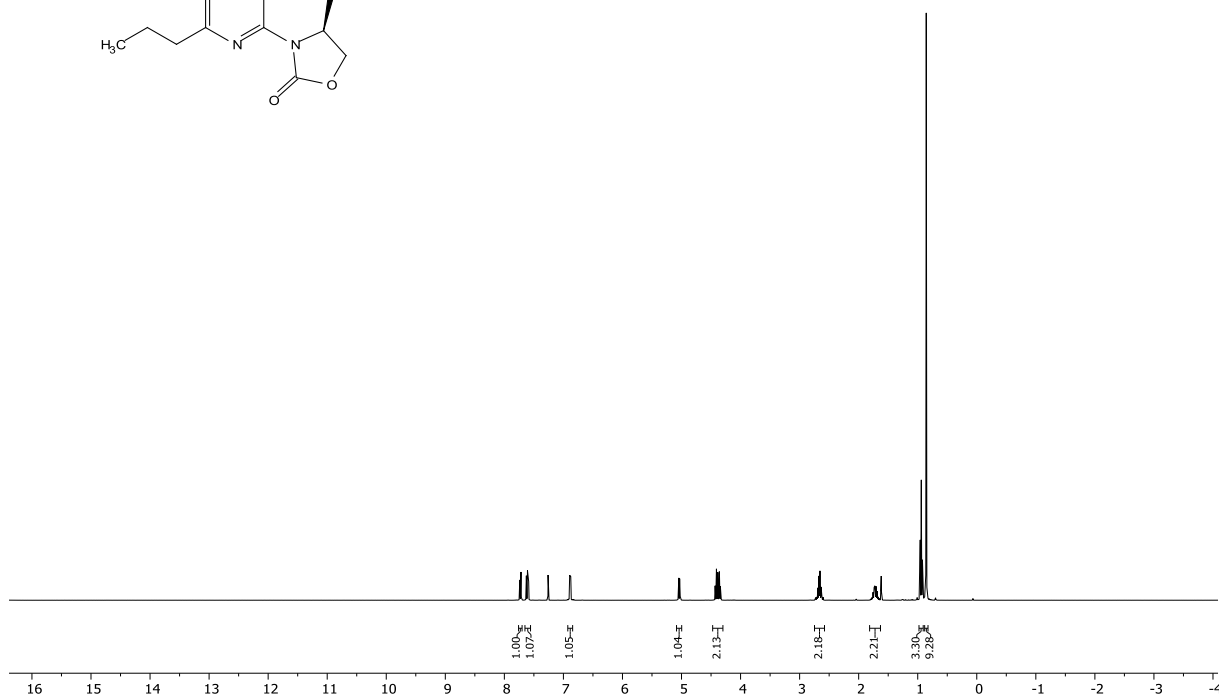

$^{13}\text{C}\{^1\text{H}\}$  NMR(101 MHz, Chloroform)

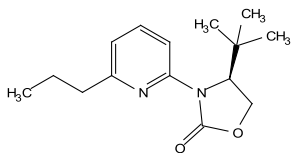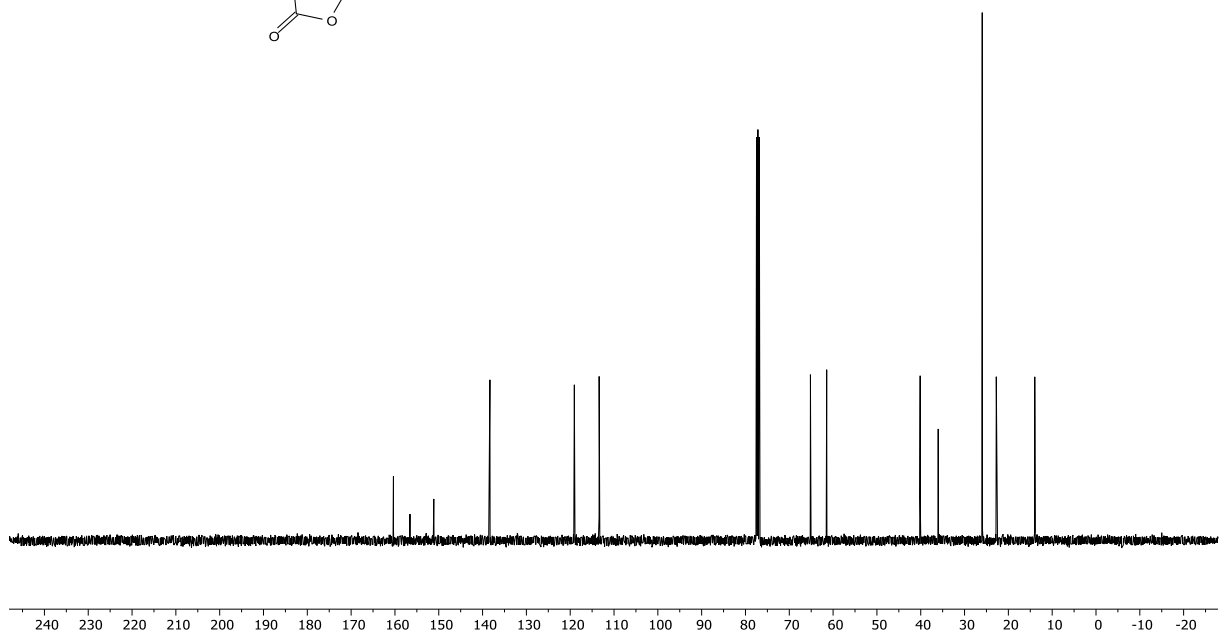

<sup>1</sup>H NMR(400 MHz, Chloroform)

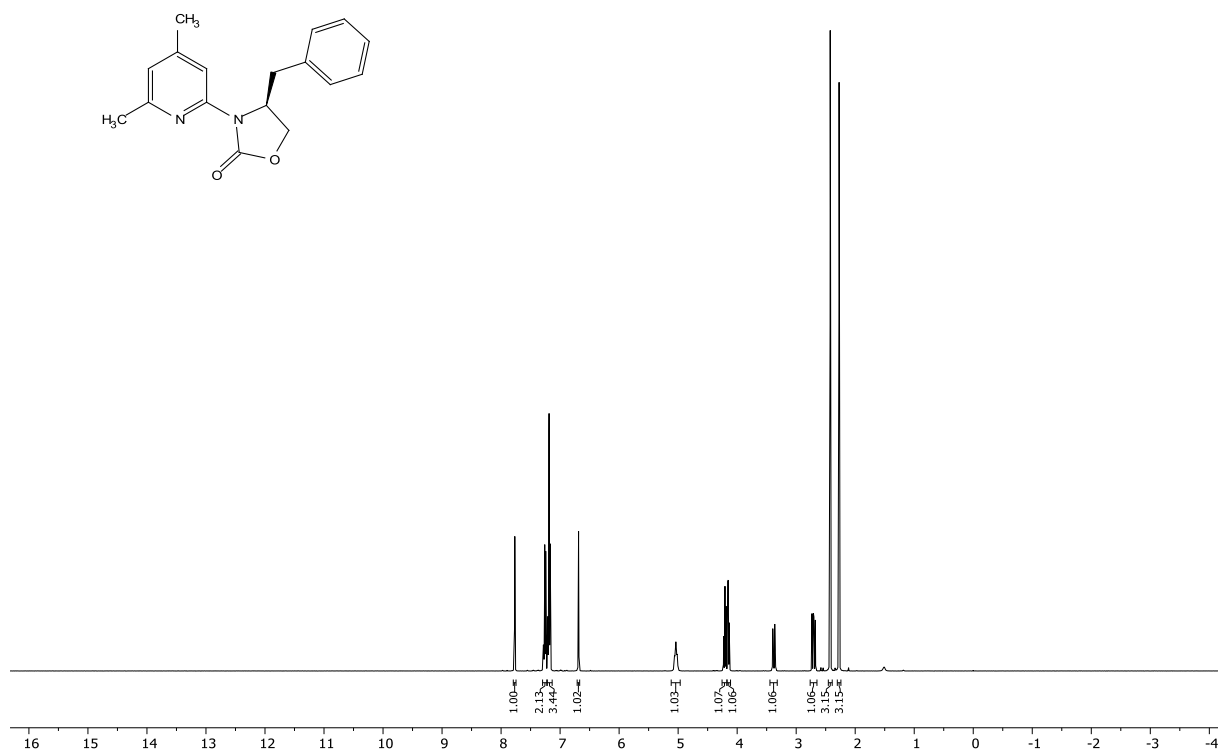

<sup>13</sup>C{<sup>1</sup>H} NMR(101 MHz, Chloroform)

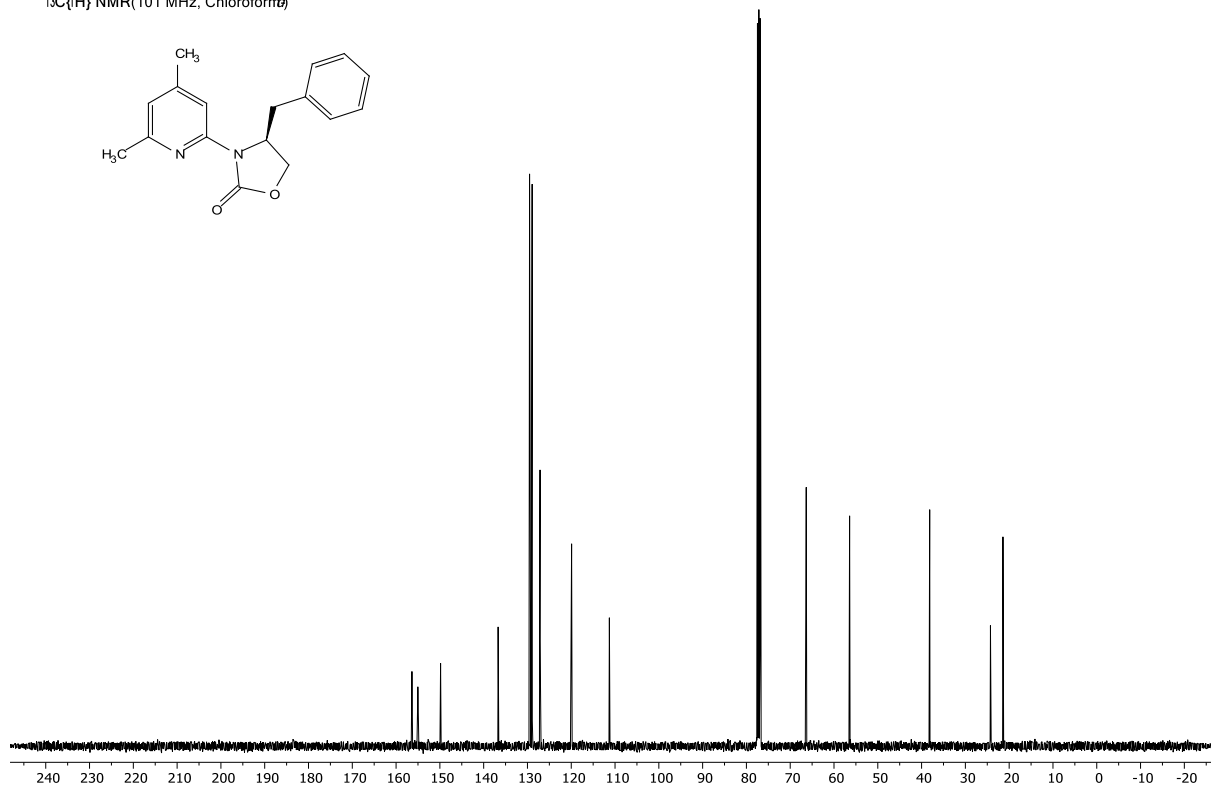

<sup>1</sup>H NMR(400 MHz, Chloroform)

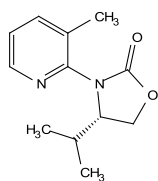

— 7.26 CDCl<sub>3</sub>

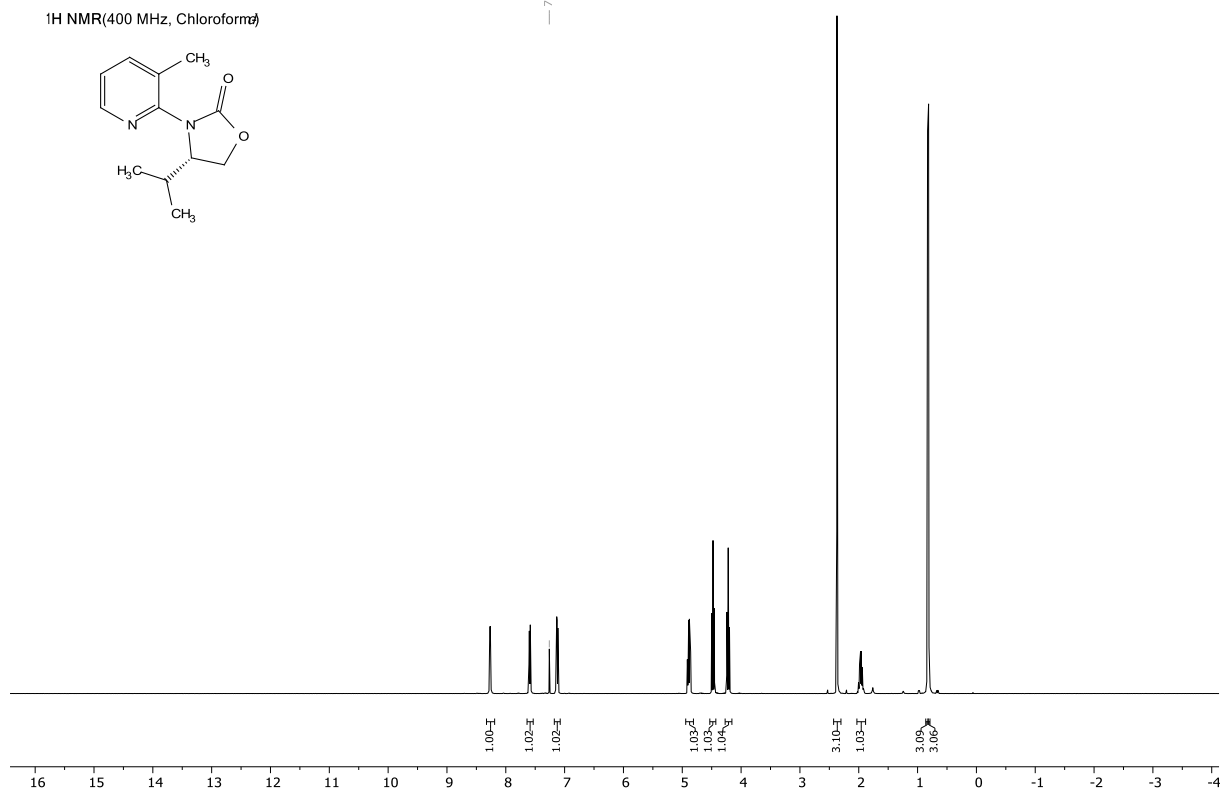

<sup>13</sup>C{<sup>1</sup>H} NMR(101 MHz, Chloroform)

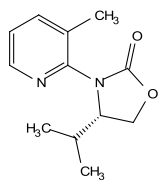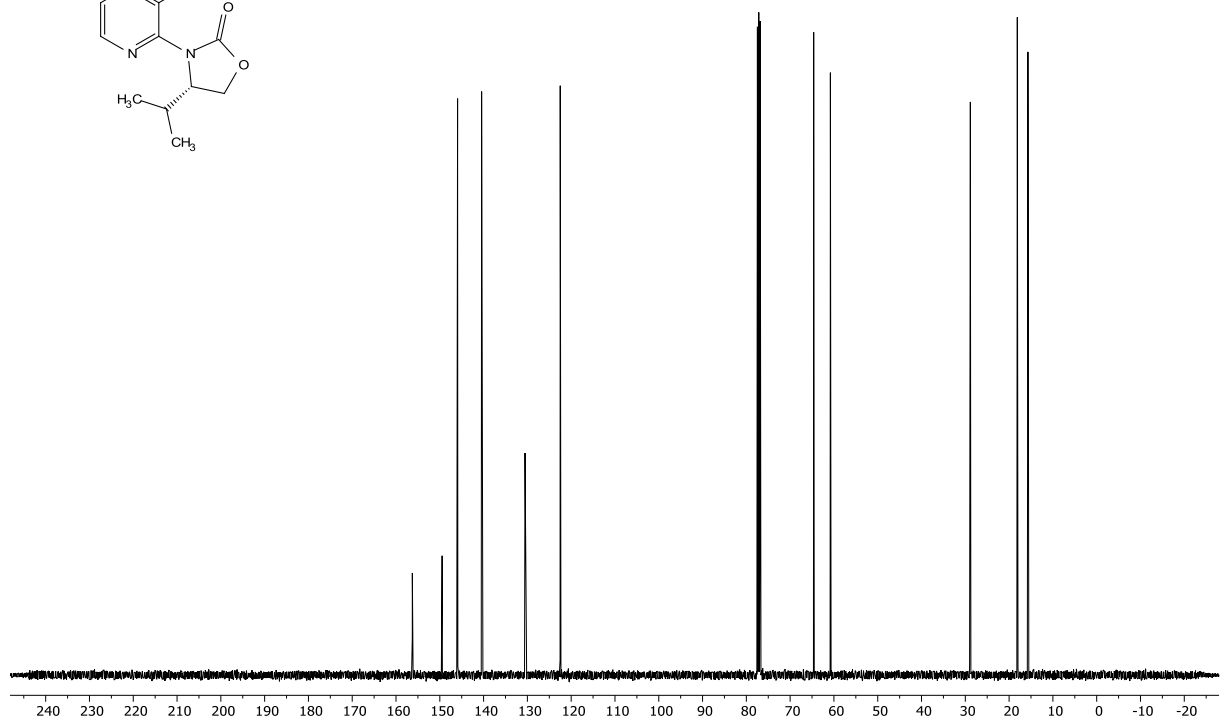

<sup>1</sup>H NMR(400 MHz, Chloroform-d)

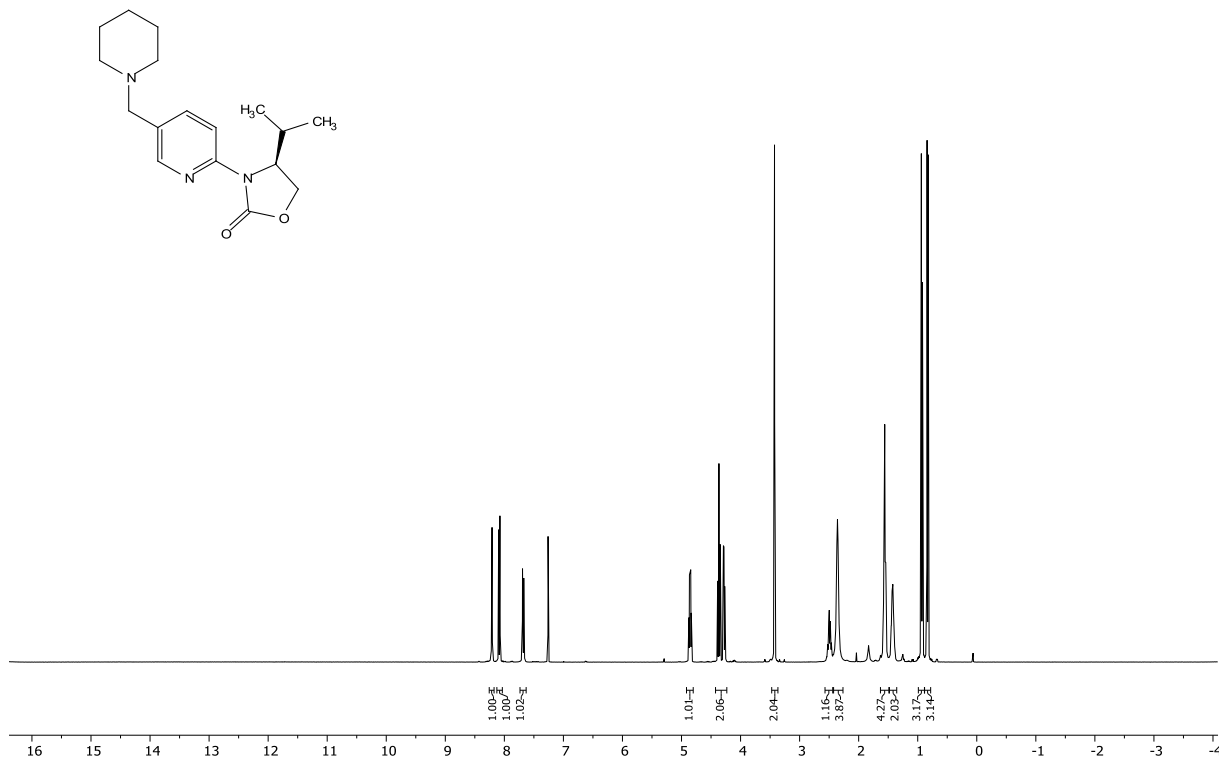

<sup>13</sup>C{<sup>1</sup>H} NMR(101 MHz, Chloroform-d)

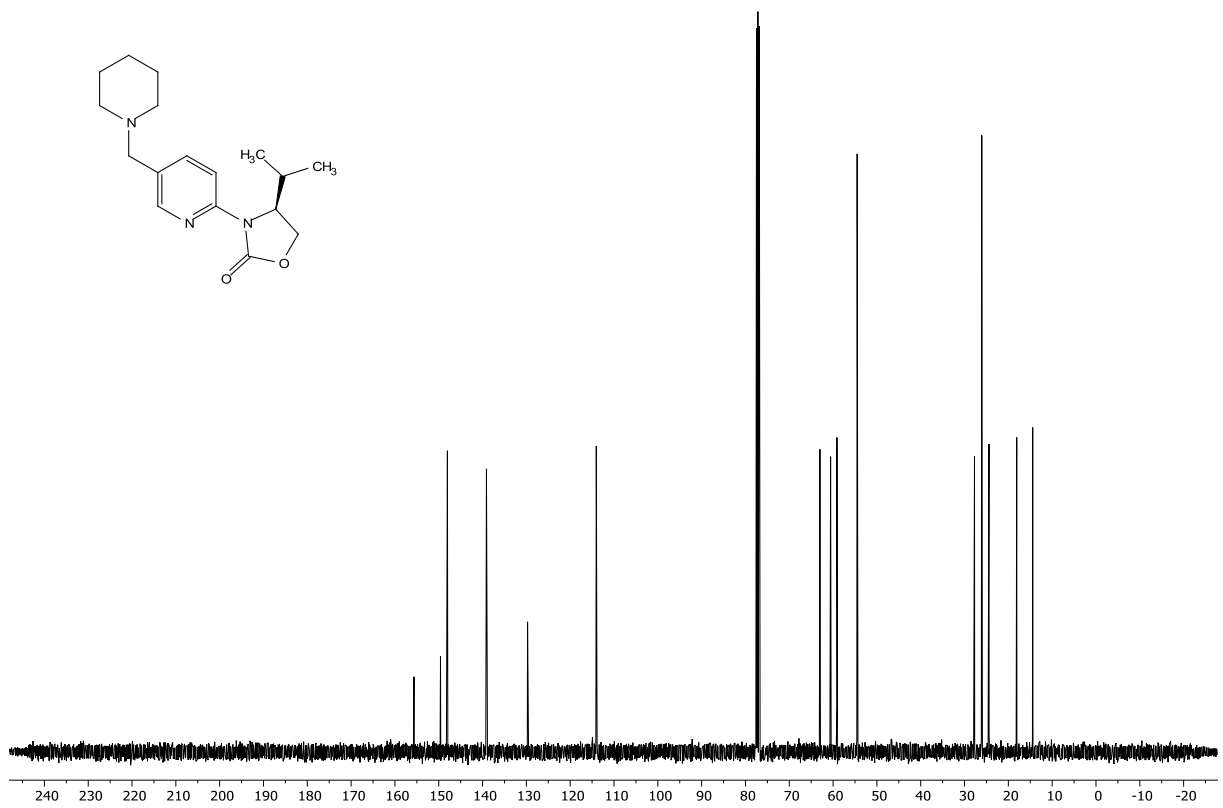



<sup>1</sup>H NMR(400 MHz, Chloroform)

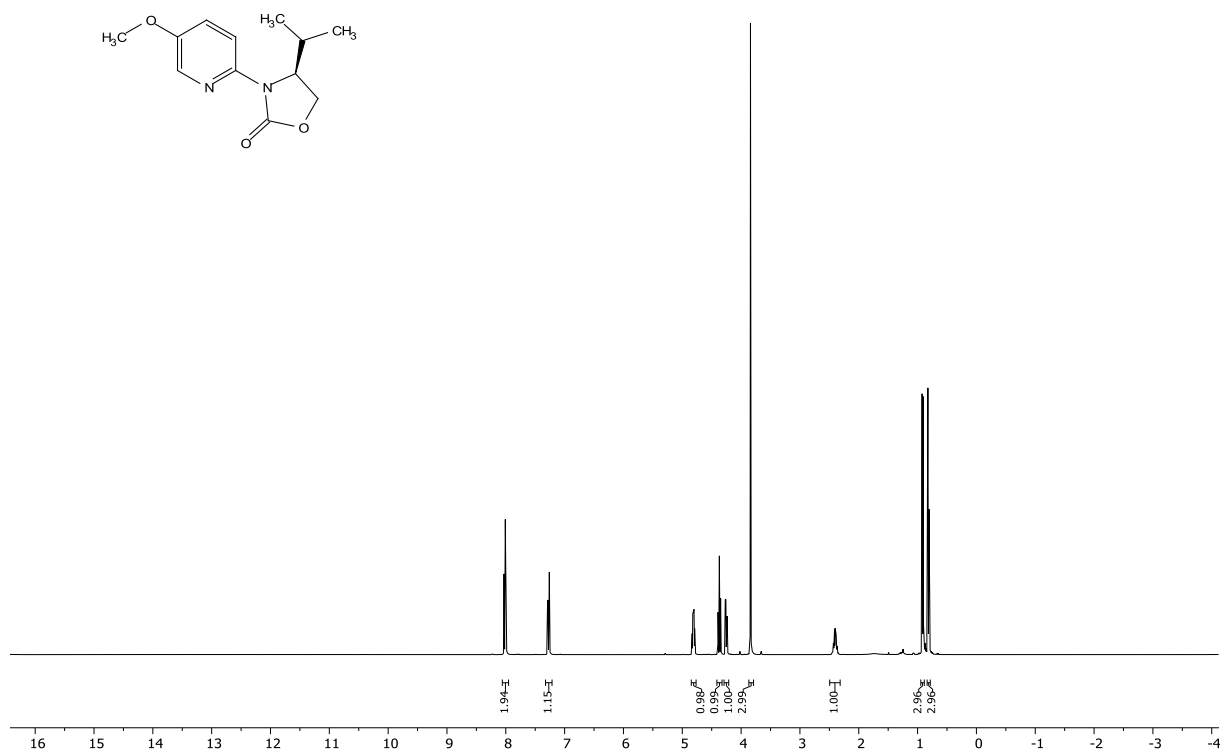

<sup>13</sup>C{<sup>1</sup>H} NMR(101 MHz, Chloroform)

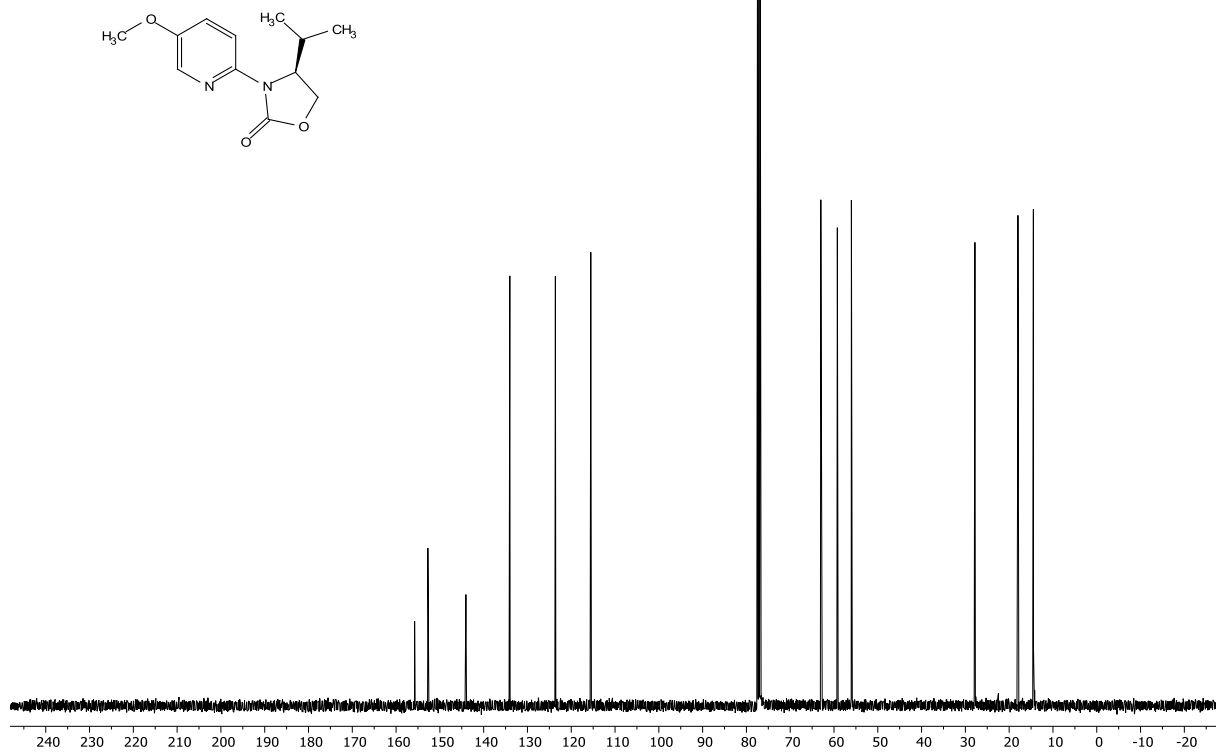

<sup>1</sup>H NMR(500 MHz, Chloroform-d)

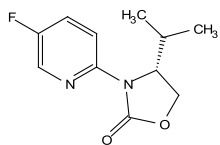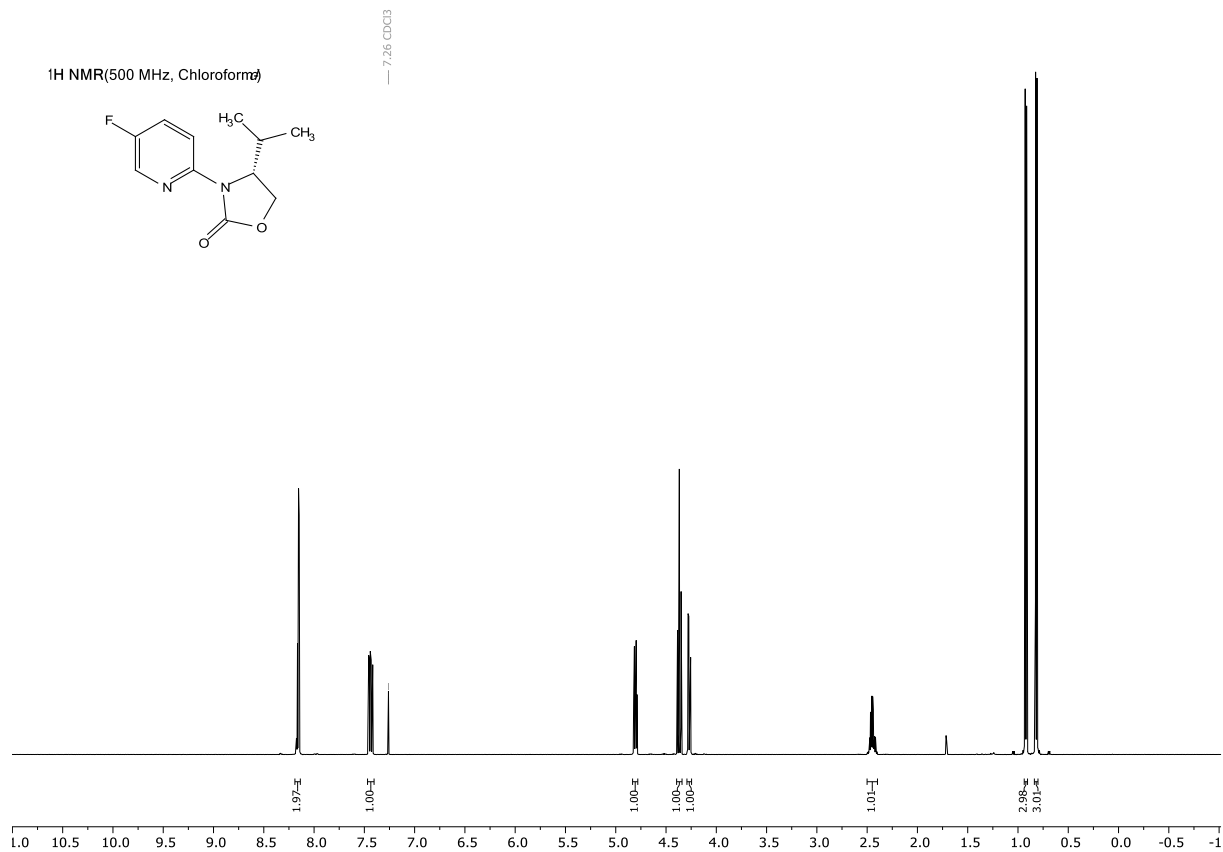

<sup>13</sup>C{<sup>1</sup>H} NMR(126 MHz, Chloroform-d)

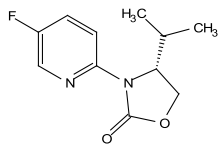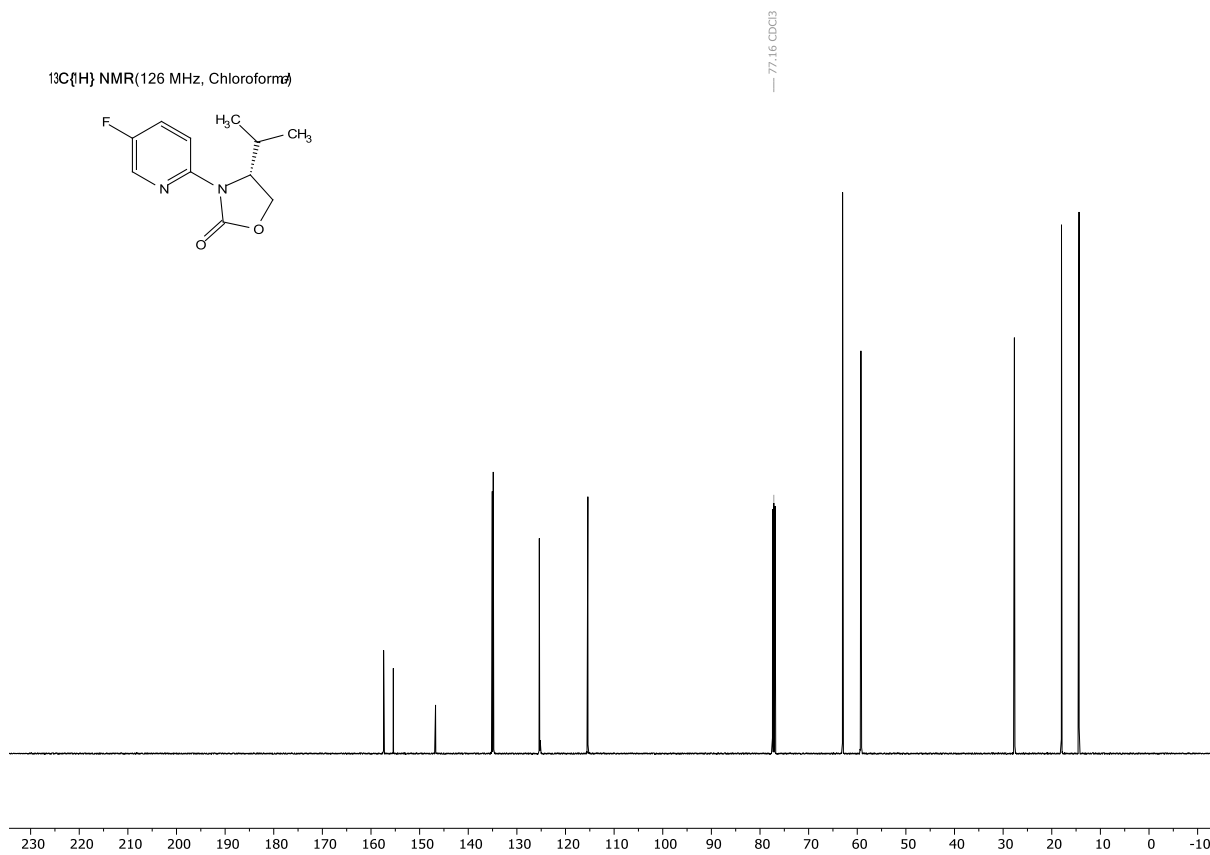

<sup>19</sup>F-NMR (470 MHz, Chloroform)

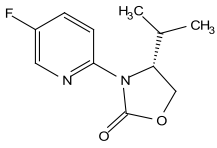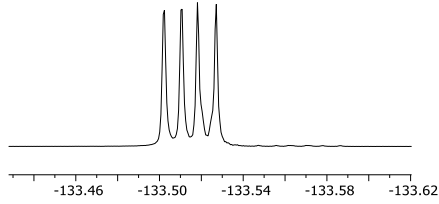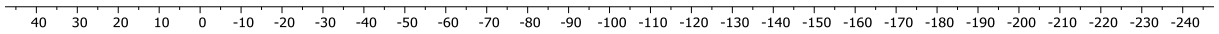

<sup>1</sup>H NMR(400 MHz, Chloroform)

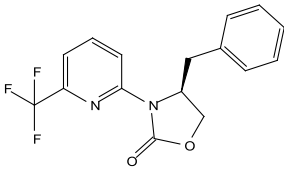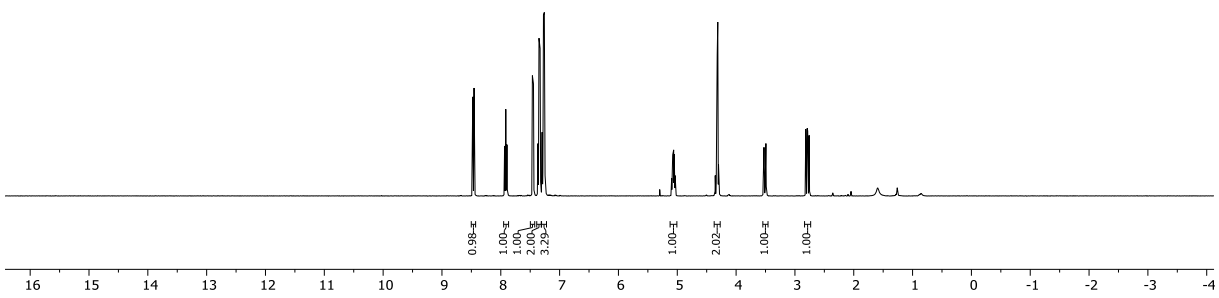

$^{13}\text{C}\{^1\text{H}\}$  NMR (101 MHz, Chloroform)

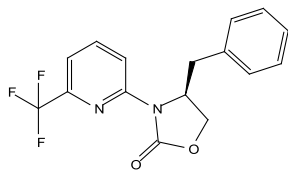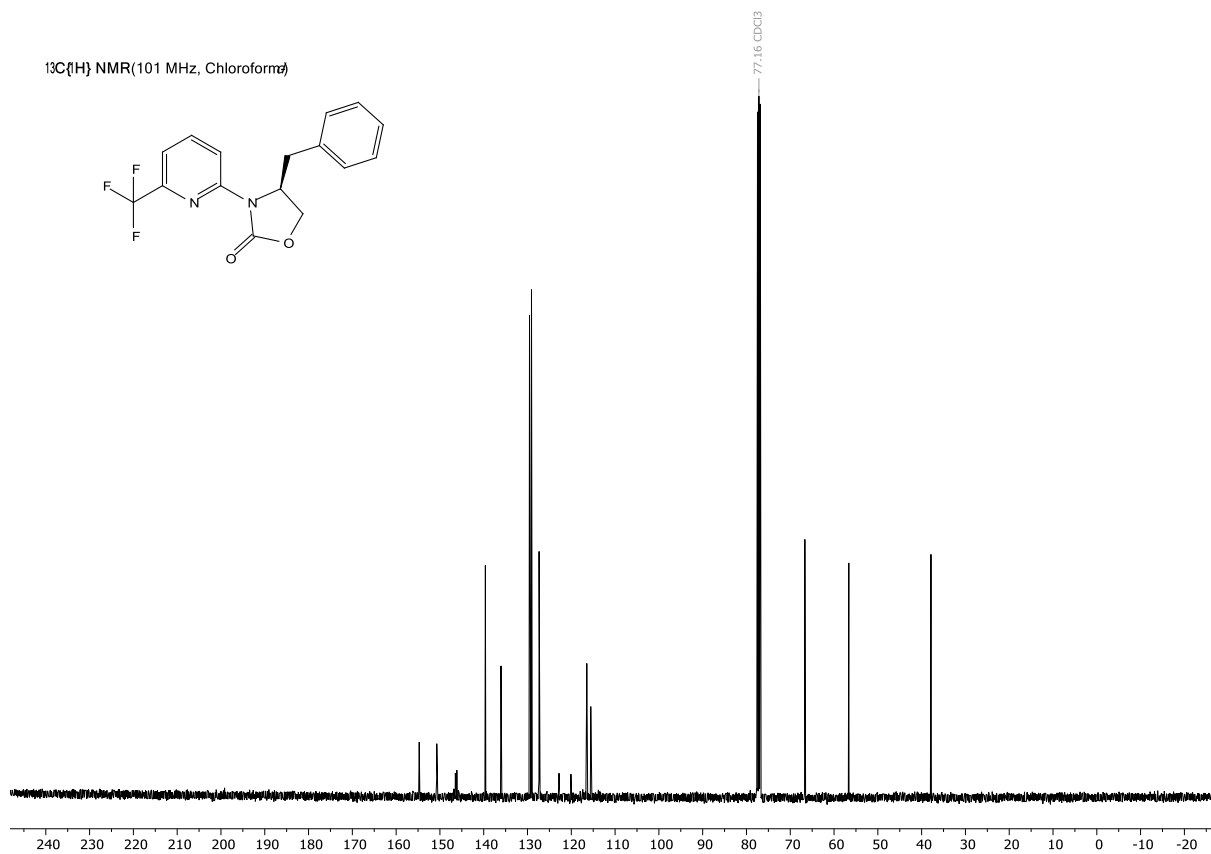

$^{19}\text{F}\{^1\text{H}\}$  NMR (376 MHz, Chloroform)

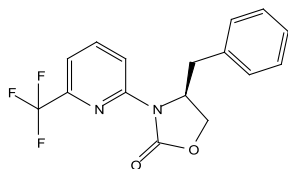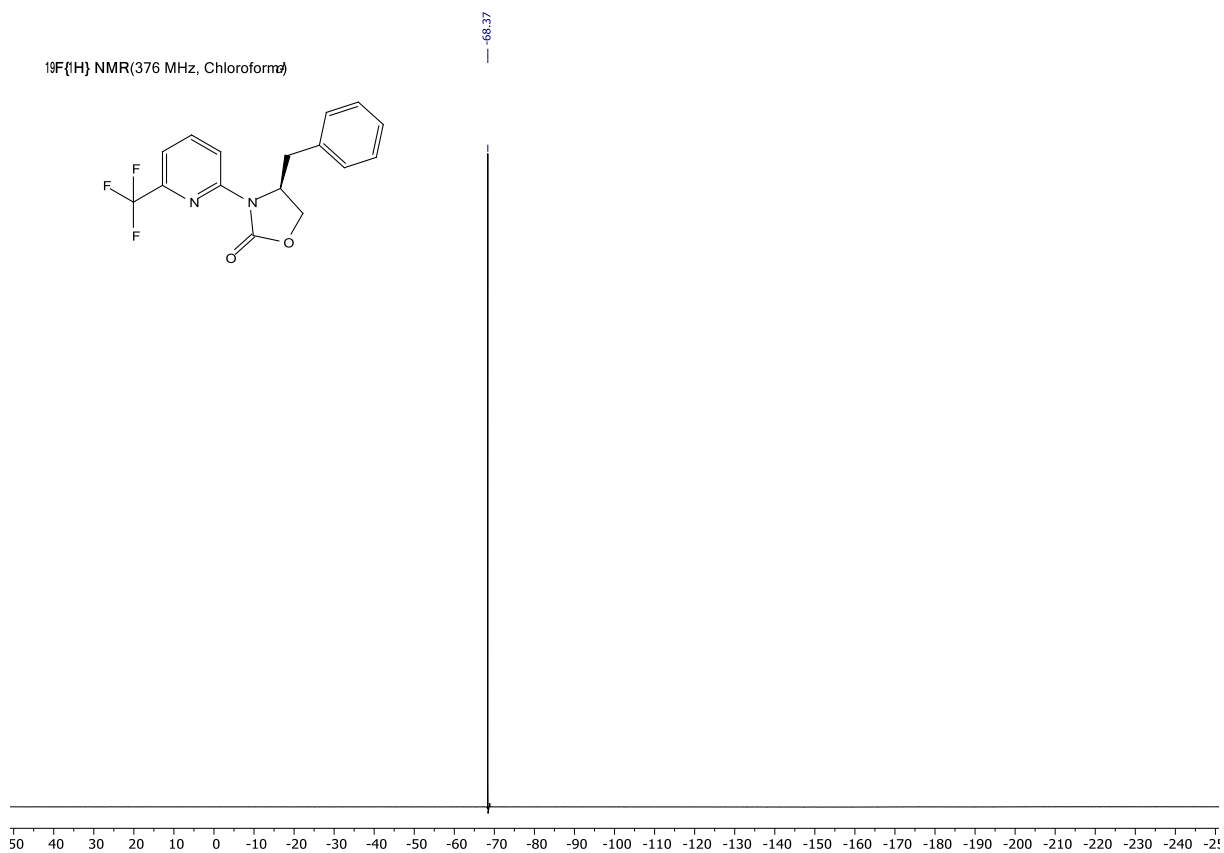

<sup>1</sup>H NMR(400 MHz, Chloroform)

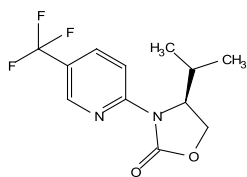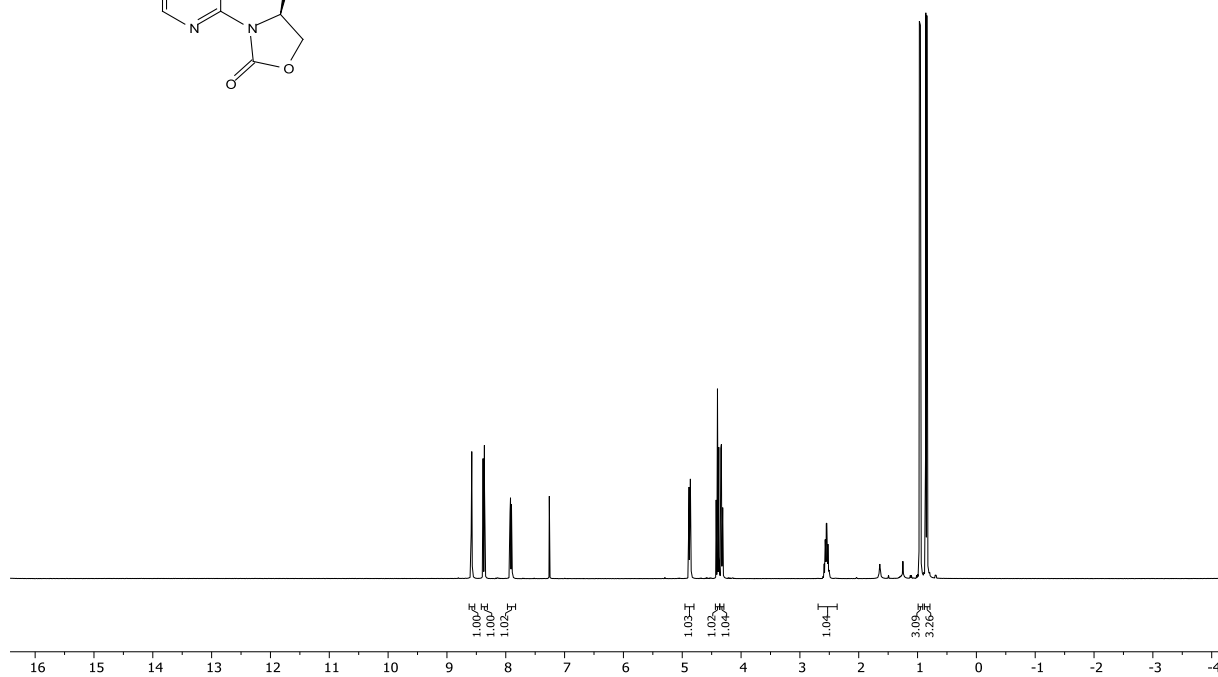

<sup>13</sup>C{<sup>1</sup>H} NMR(101 MHz, Chloroform)

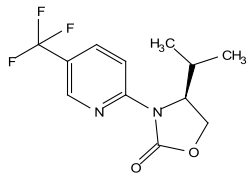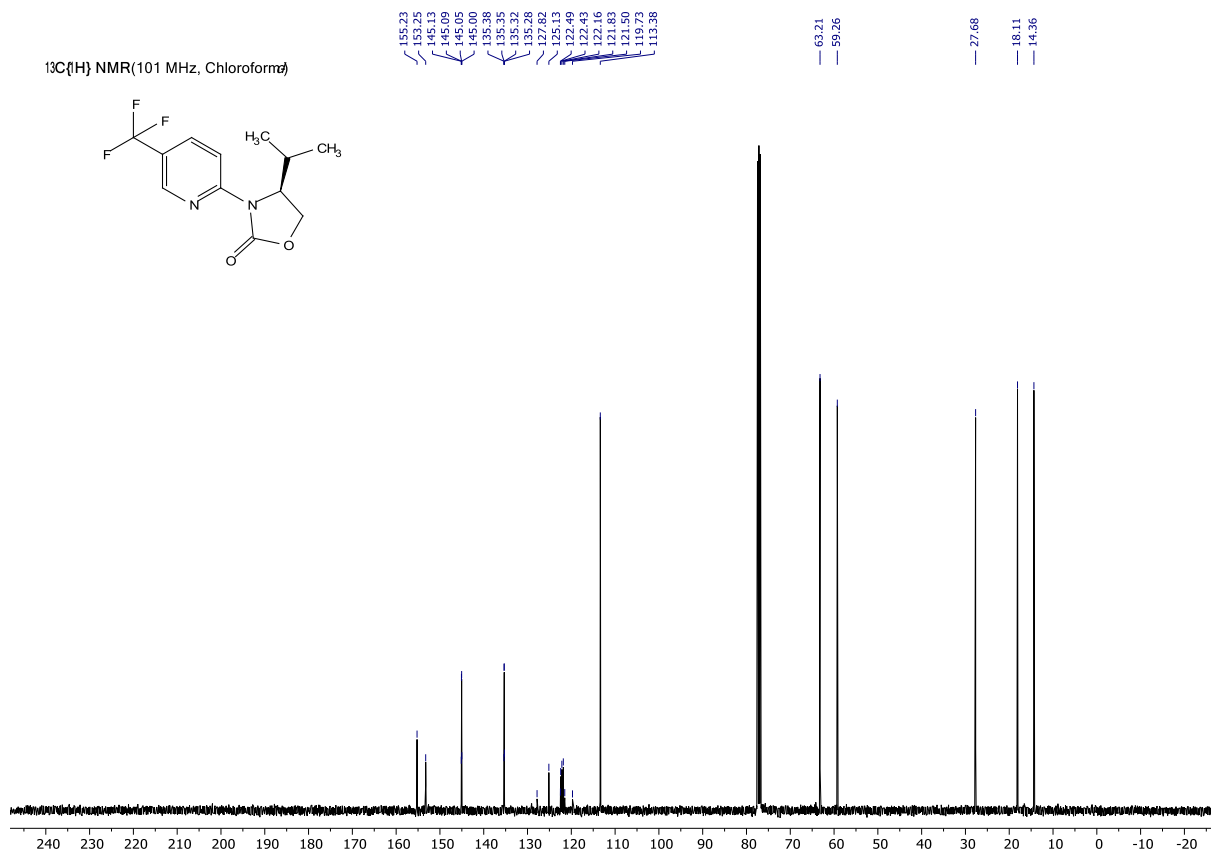

$^{19}\text{F}\{^1\text{H}\}$  NMR(376 MHz, Chloroform)

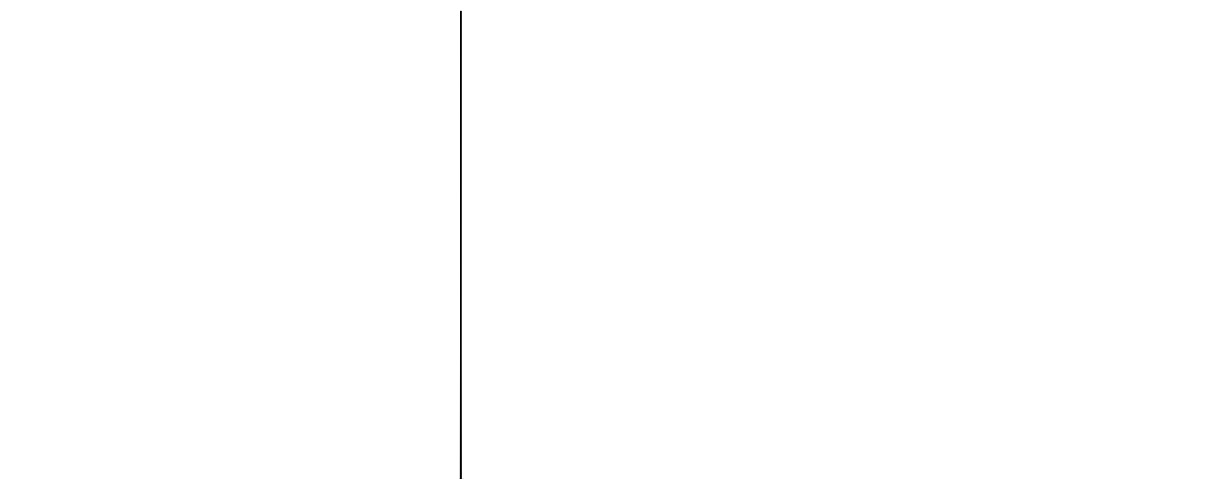

50 40 30 20 10 0 -10 -20 -30 -40 -50 -60 -70 -80 -90 -100 -110 -120 -130 -140 -150 -160 -170 -180 -190 -200 -210 -220 -230 -240 -250

$^1\text{H}$  NMR(400 MHz, Chloroform)

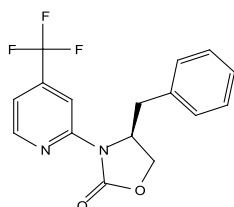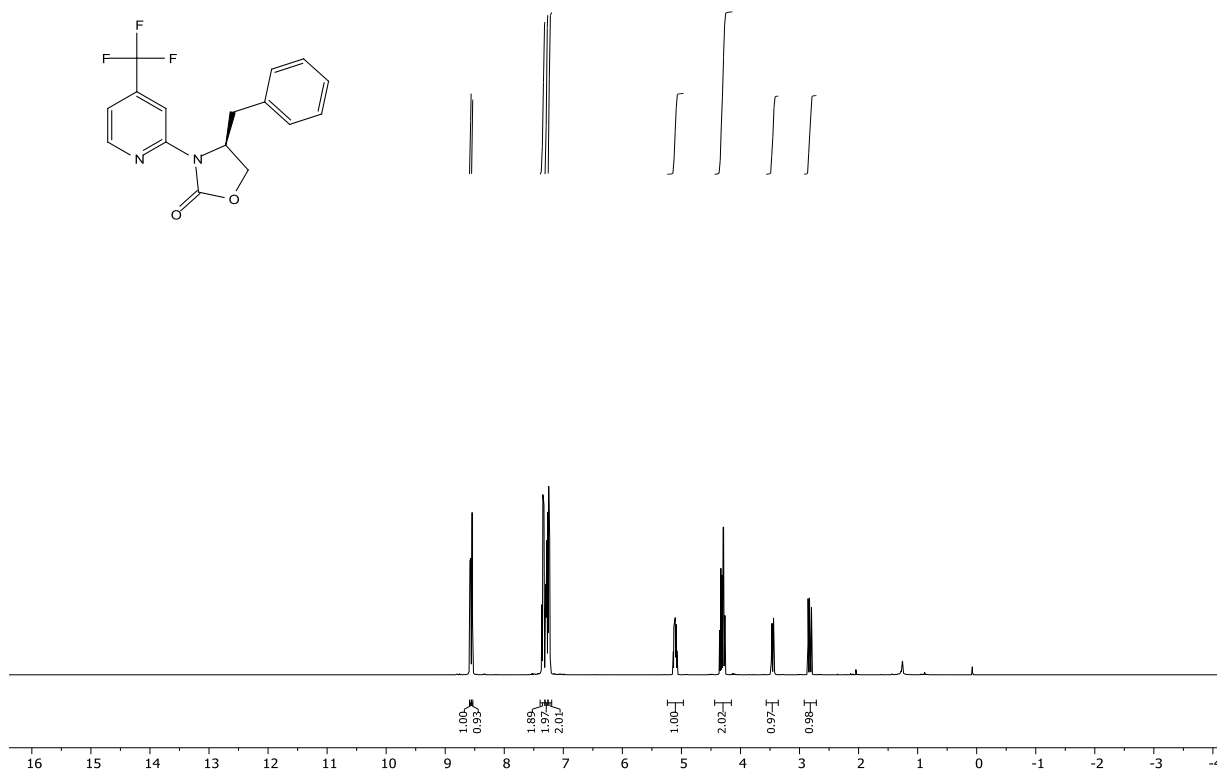

$^{13}\text{C}\{^1\text{H}\}$  NMR (101 MHz, Chloroform)

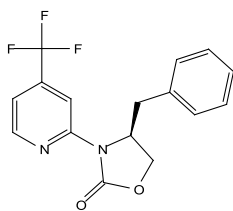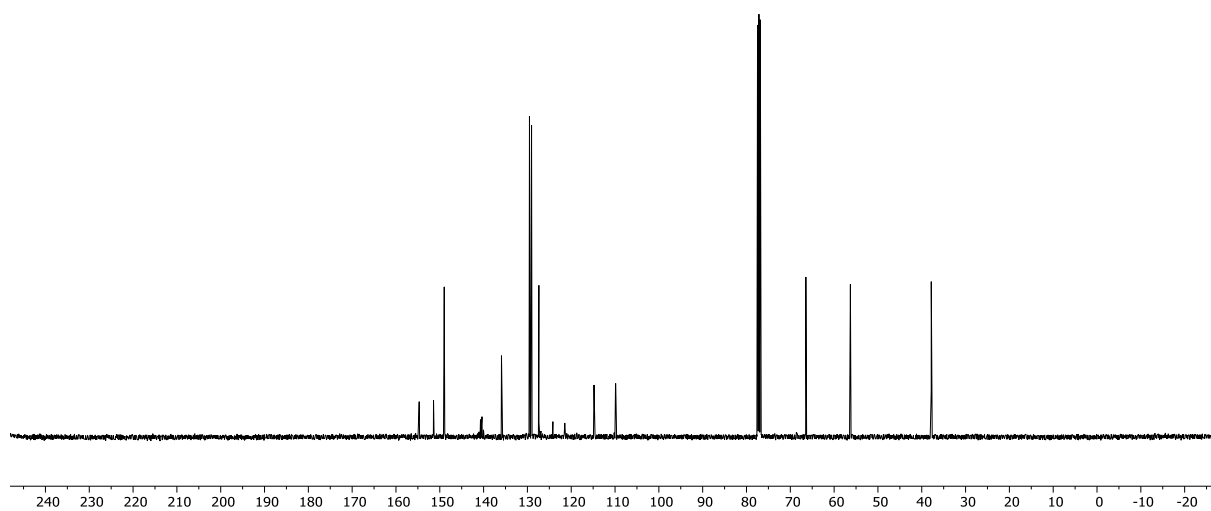

$^{19}\text{F}$  NMR (376 MHz, Chloroform)

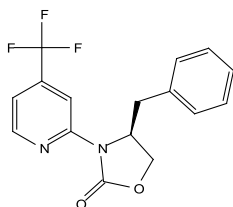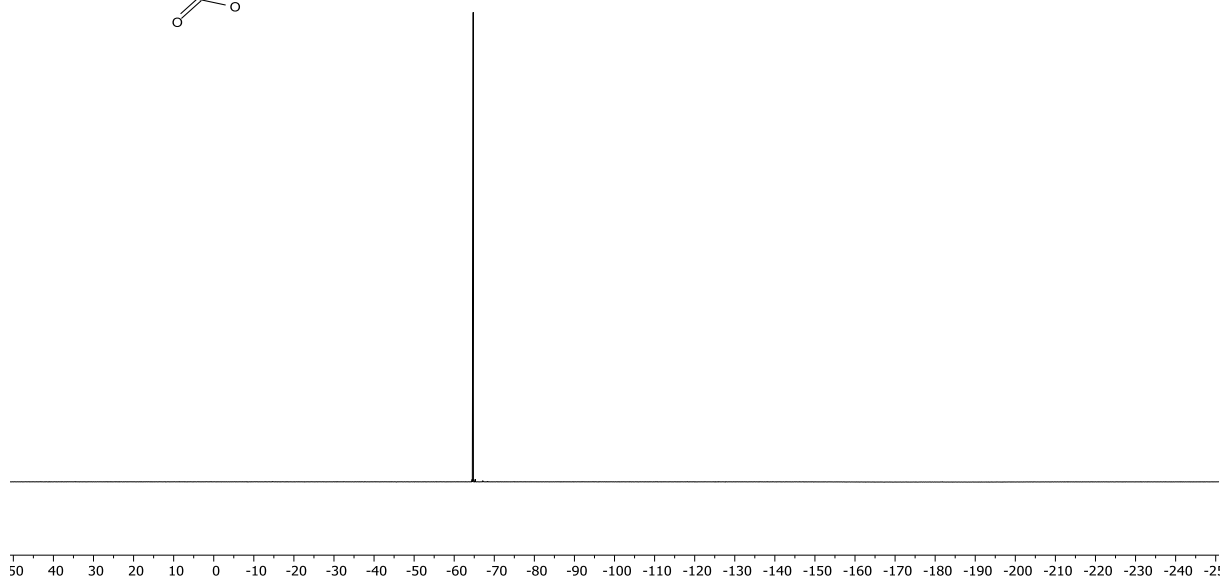

<sup>1</sup>H NMR(400 MHz, Chloroform-d)

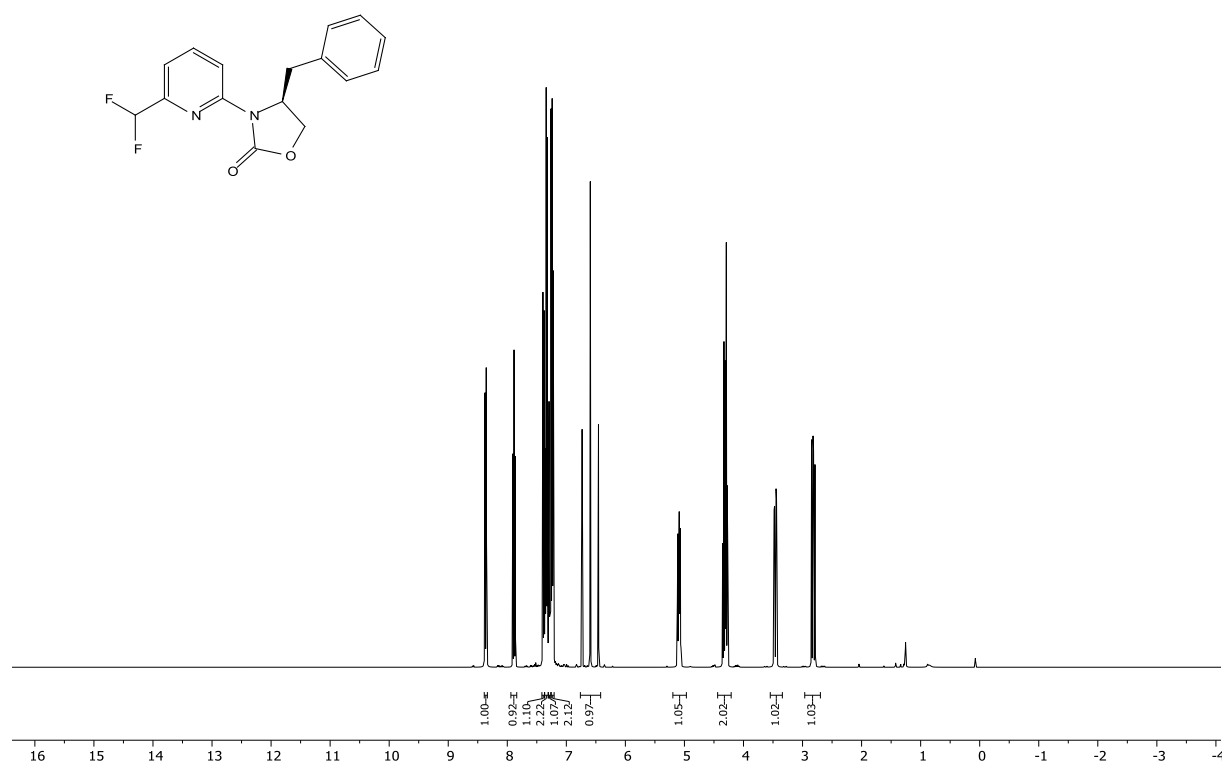

<sup>13</sup>C{<sup>1</sup>H} NMR(101 MHz, Chloroform-d)

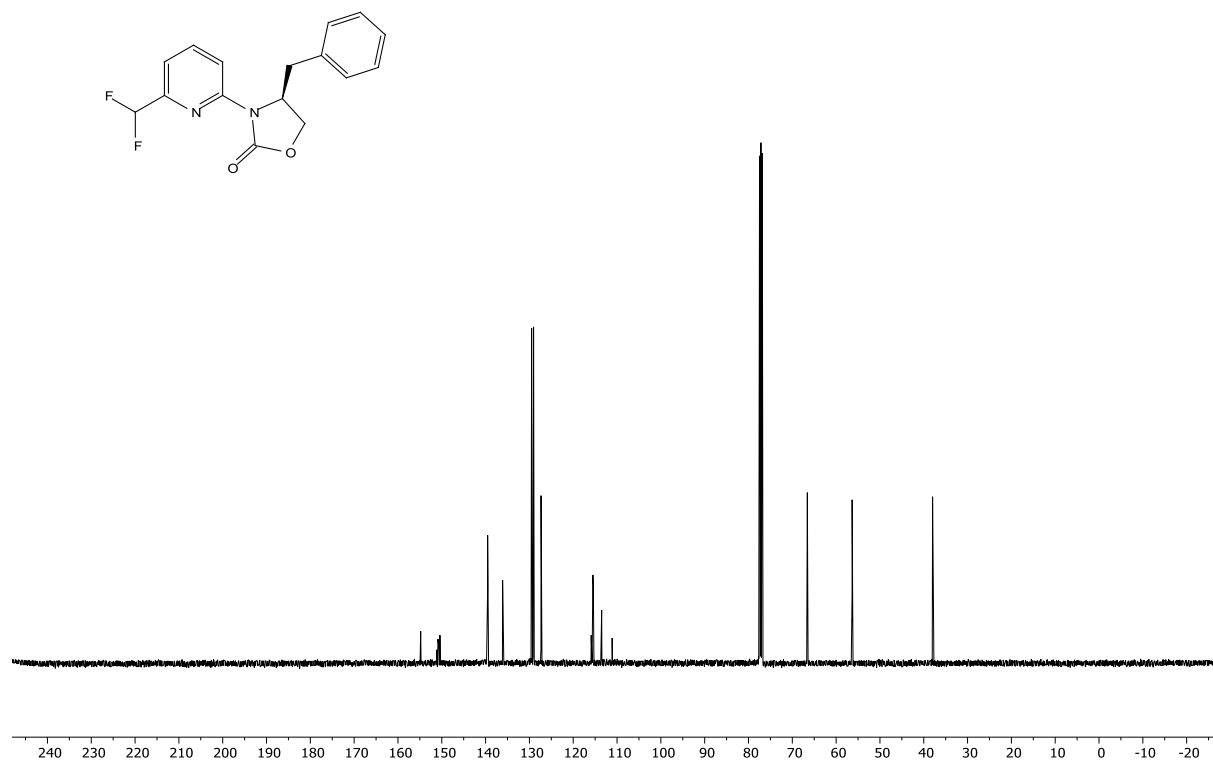



<sup>19</sup>F-NMR(377 MHz, Chloroform)

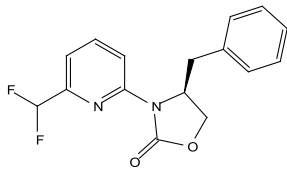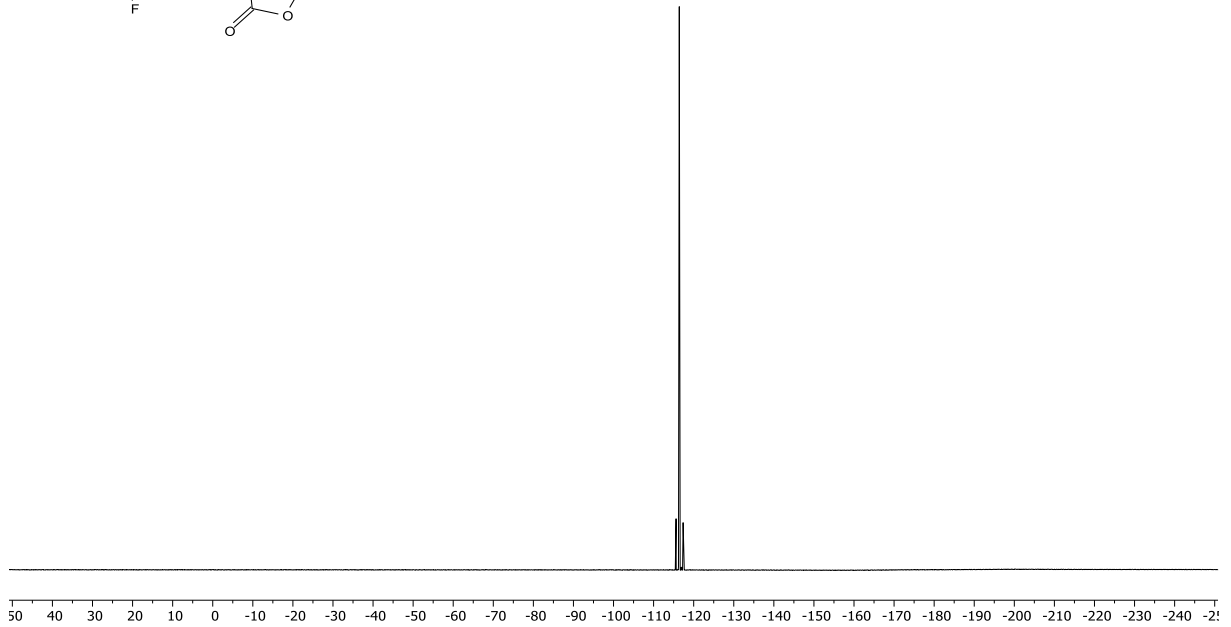

<sup>1</sup>H-NMR(300 MHz, Chloroform)

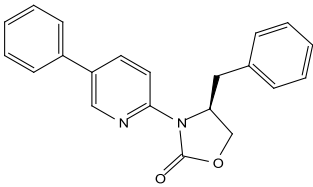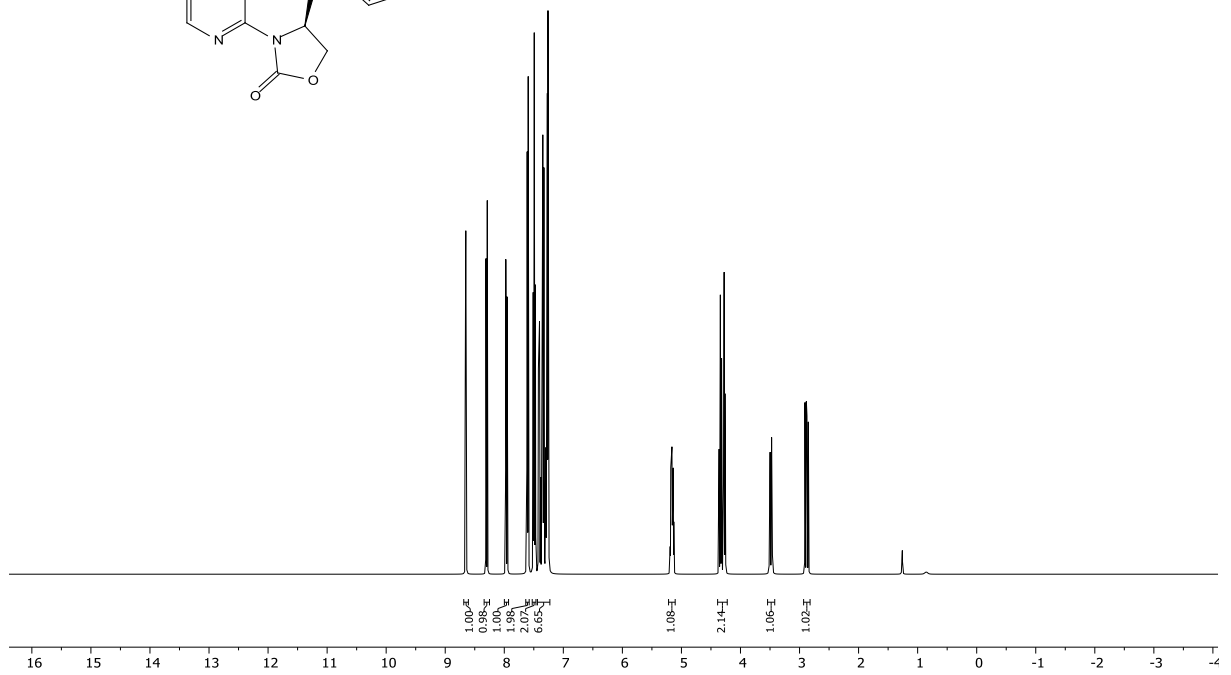

$^{13}\text{C}\{^1\text{H}\}$  NMR(75 MHz, Chloroform)

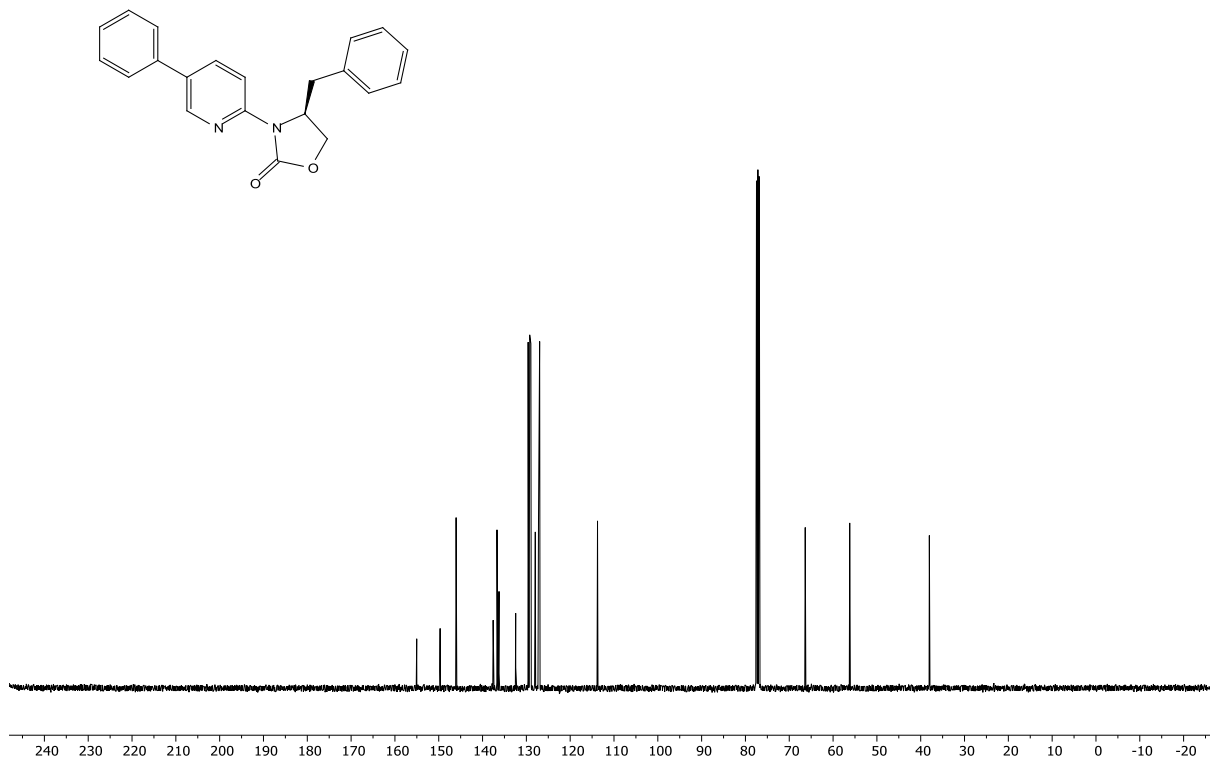

$^1\text{H}$  NMR(400 MHz, Chloroform)

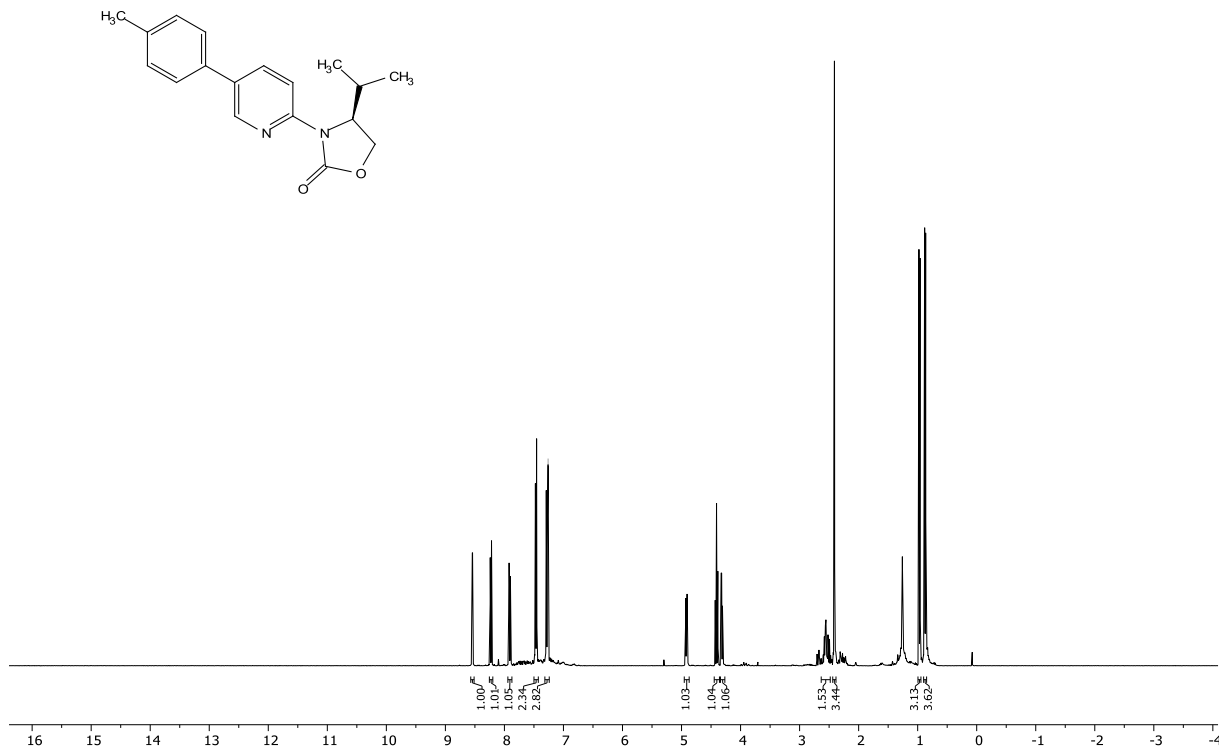

$^{13}\text{C}\{^1\text{H}\}$  NMR (101 MHz, Chloroform)

155.60  
149.51  
146.58  
137.86  
136.49  
134.64  
132.47  
129.94  
126.79  
114.30

77.16 CDCl<sub>3</sub>

63.08  
59.20

27.81  
21.28  
18.12  
14.46

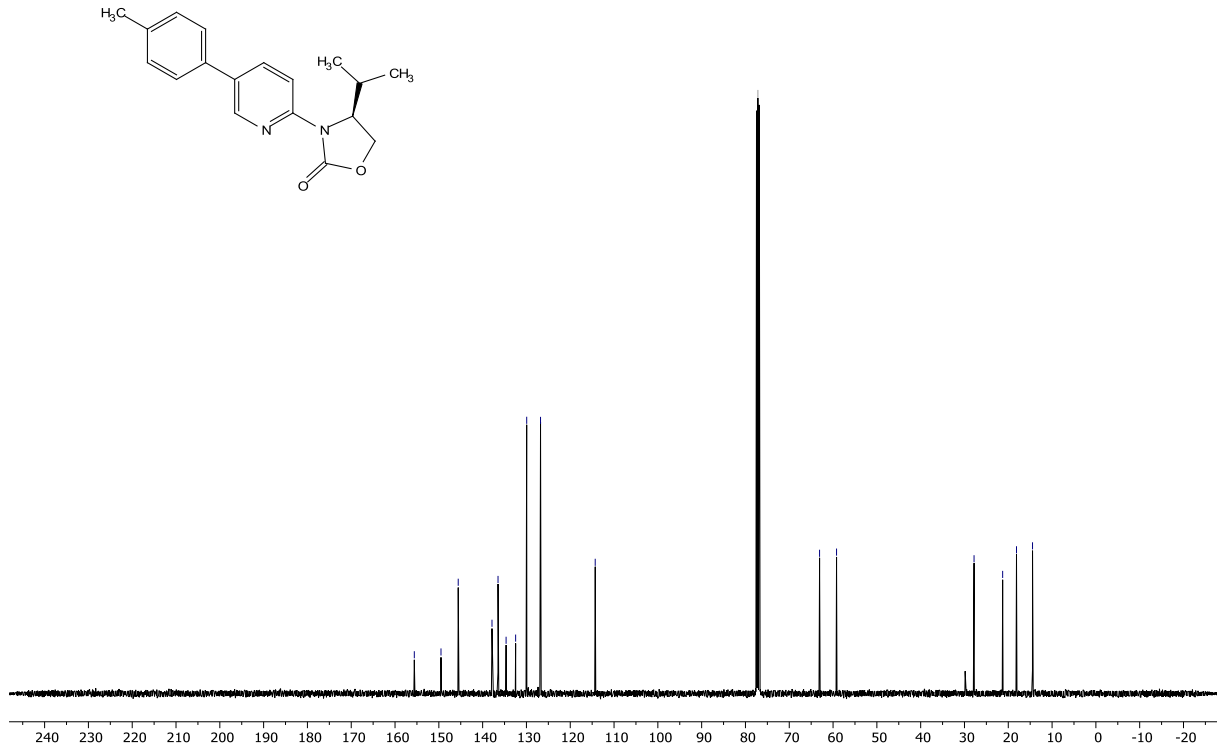

$^1\text{H}$  NMR (400 MHz, Chloroform)

7.26 CDCl<sub>3</sub>

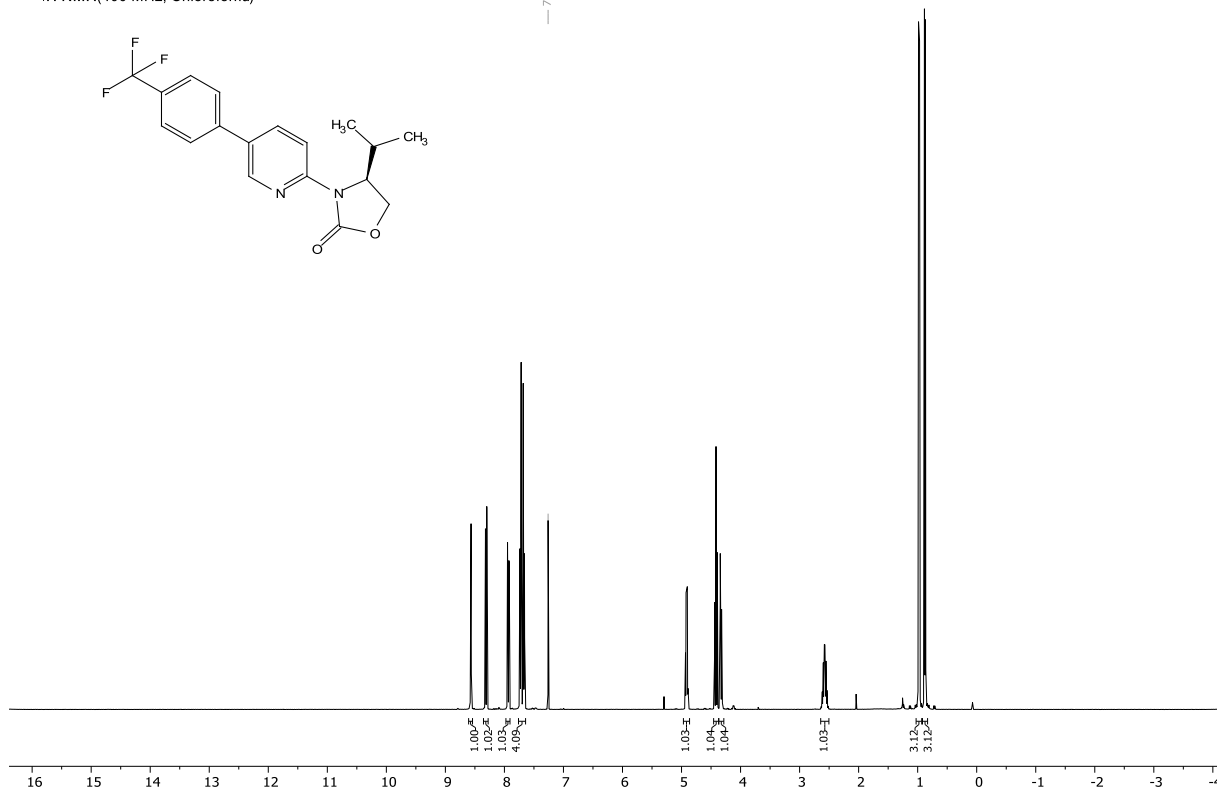

$^{13}\text{C}\{^1\text{H}\}$  NMR (101 MHz, Chloroform)

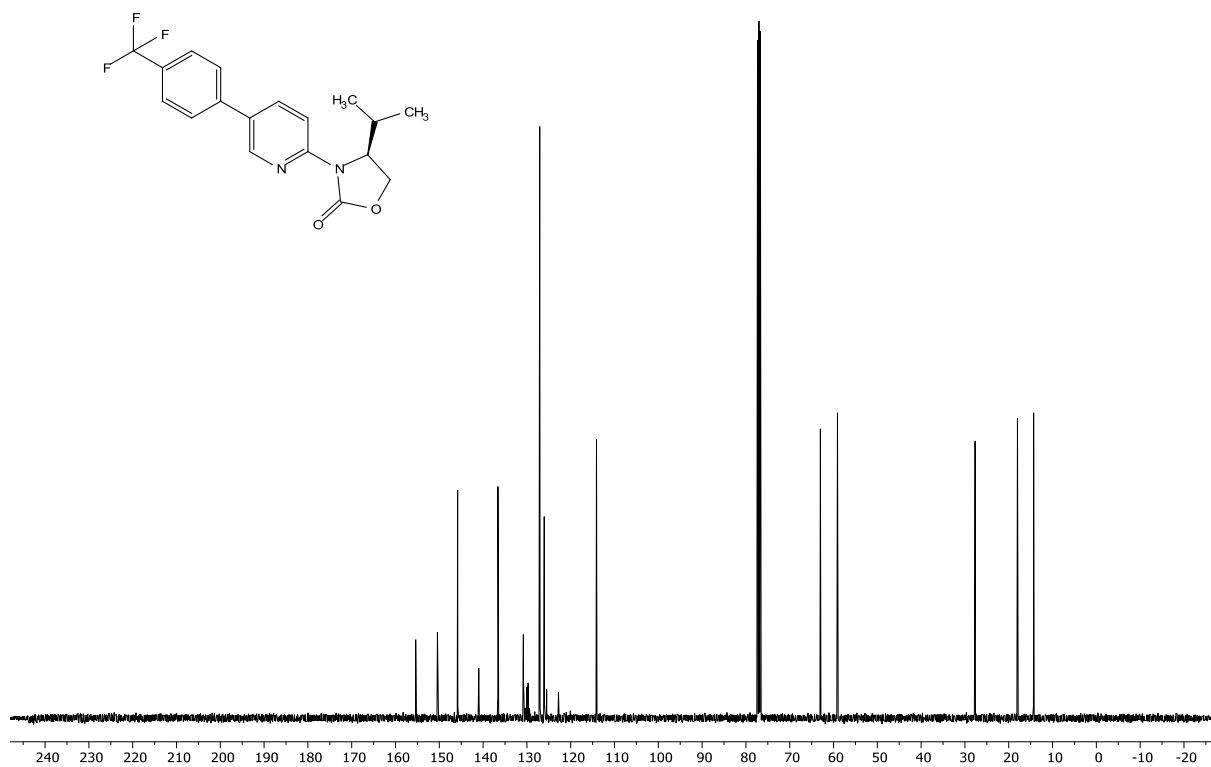

$^{19}\text{F}\{^1\text{H}\}$  NMR (376 MHz, Chloroform)

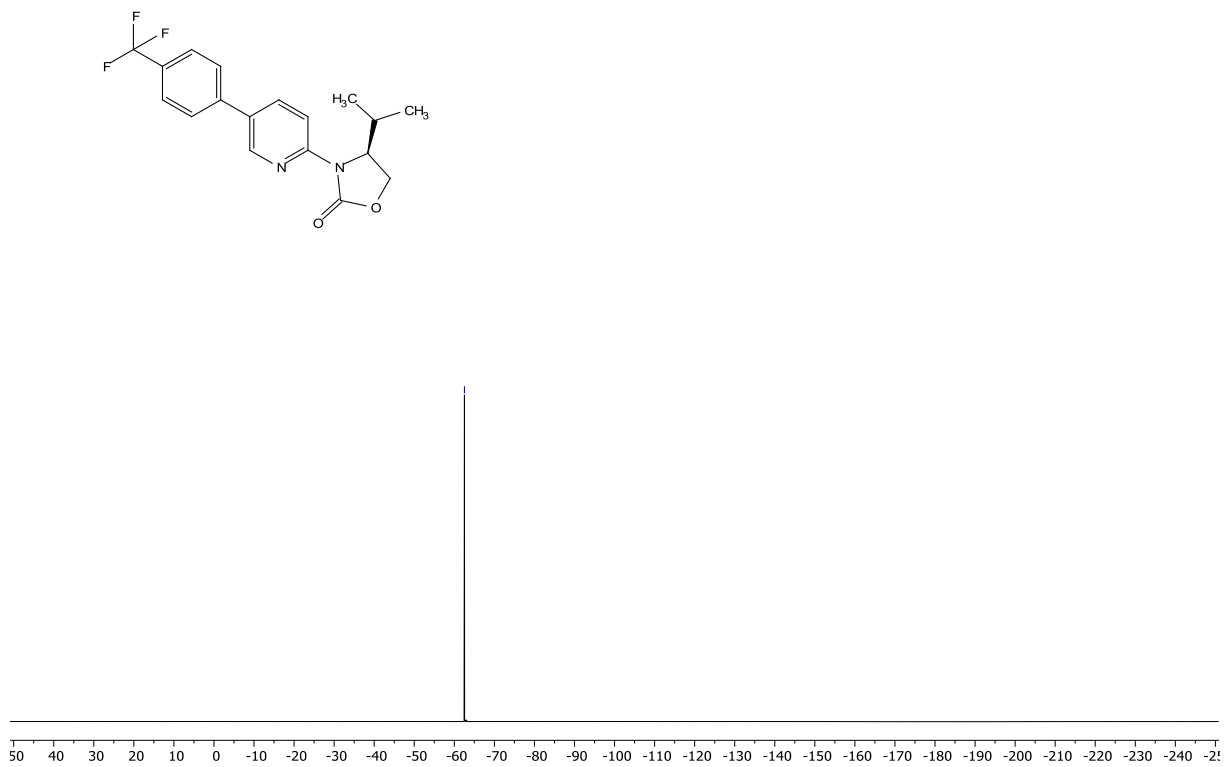

<sup>1</sup>H NMR(400 MHz, Chloroform $\delta$ )

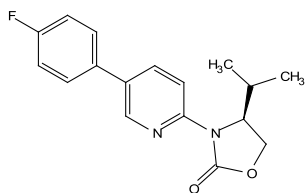

— 7.26 CDCl<sub>3</sub>

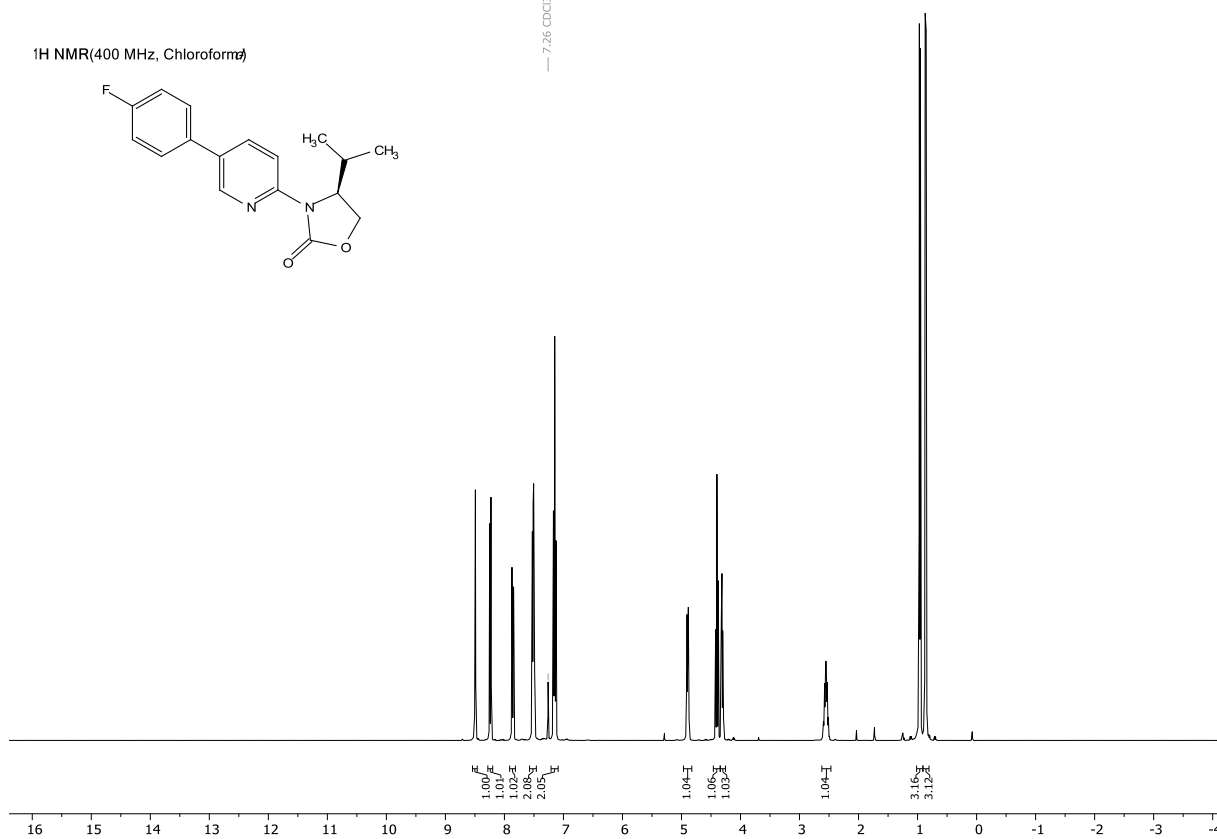

<sup>13</sup>C{<sup>1</sup>H} NMR(101 MHz, Chloroform $\delta$ )

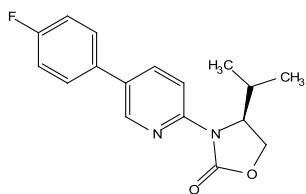

— 77.16 CDCl<sub>3</sub>

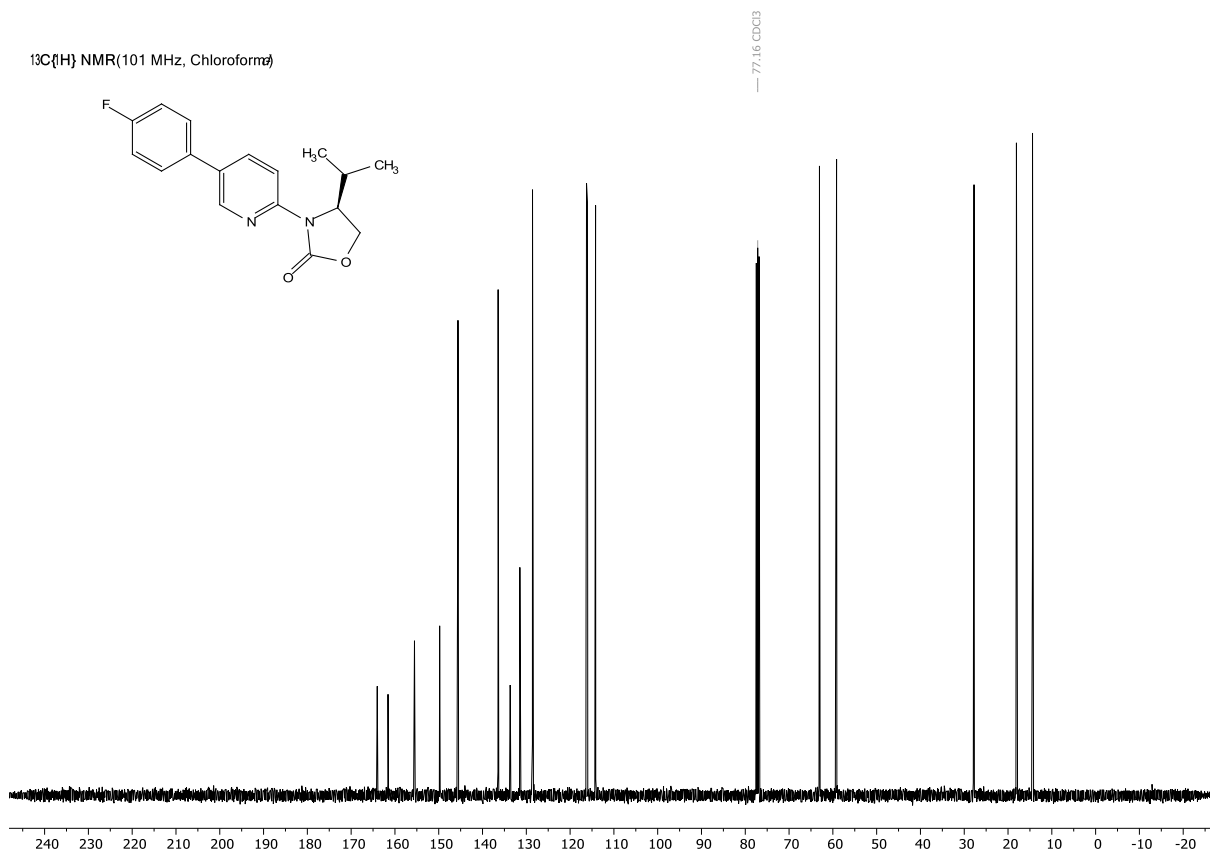

$^{19}\text{F}\{^1\text{H}\}$  NMR(376 MHz, Chloroform $d_3$ )

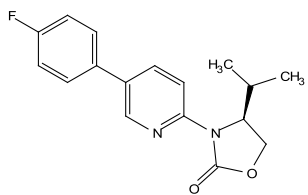

-114.59

50 40 30 20 10 0 -10 -20 -30 -40 -50 -60 -70 -80 -90 -100 -110 -120 -130 -140 -150 -160 -170 -180 -190 -200 -210 -220 -230 -240 -250

$^1\text{H}$  NMR(400 MHz, Chloroform $d_3$ )

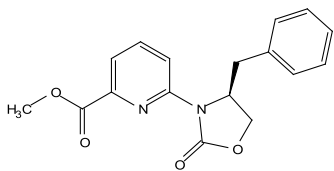

16 15 14 13 12 11 10 9 8 7 6 5 4 3 2 1 0 -1 -2 -3 -4  
1.00-  
1.99-  
4.00-  
0.85-  
0.97-  
2.01-  
2.82-  
1.00-  
0.99-  
16 15 14 13 12 11 10 9 8 7 6 5 4 3 2 1 0 -1 -2 -3 -4

$^{13}\text{C}\{^1\text{H}\}$  NMR (101 MHz, Chloroform- $d_3$ )

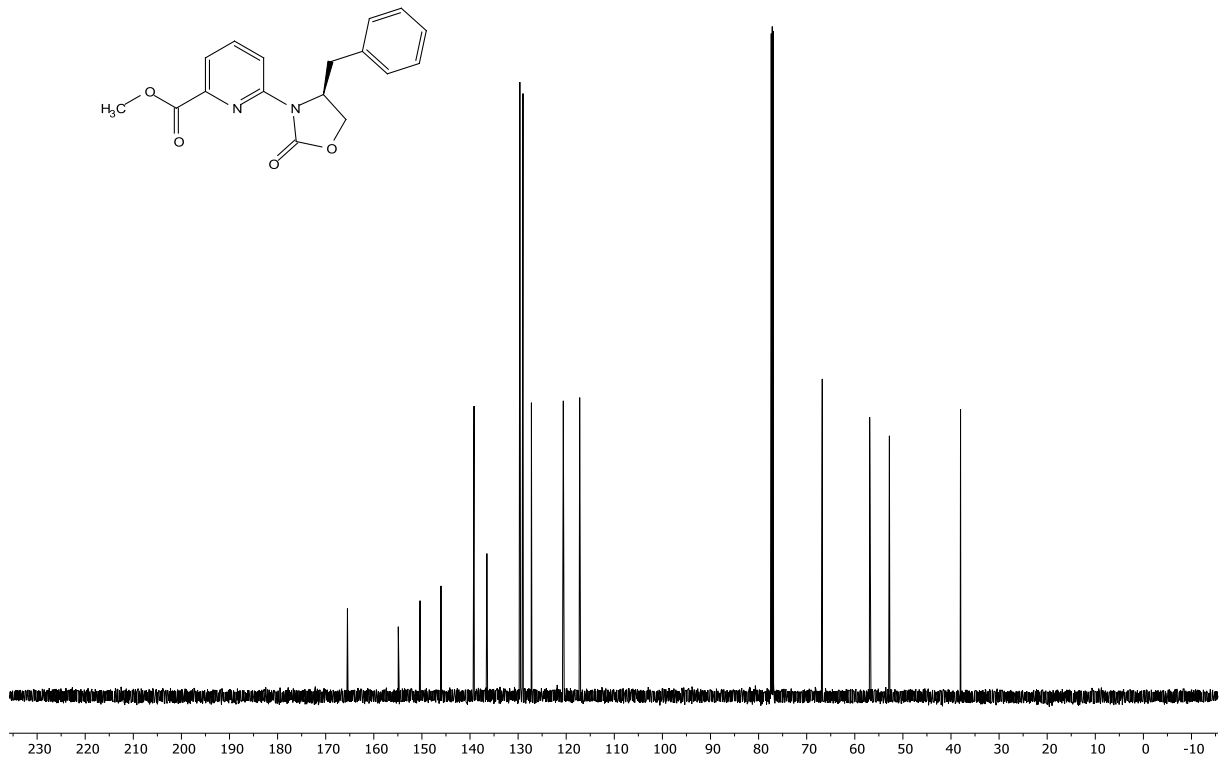

$^1\text{H}$  NMR (400 MHz, Chloroform- $d_3$ )

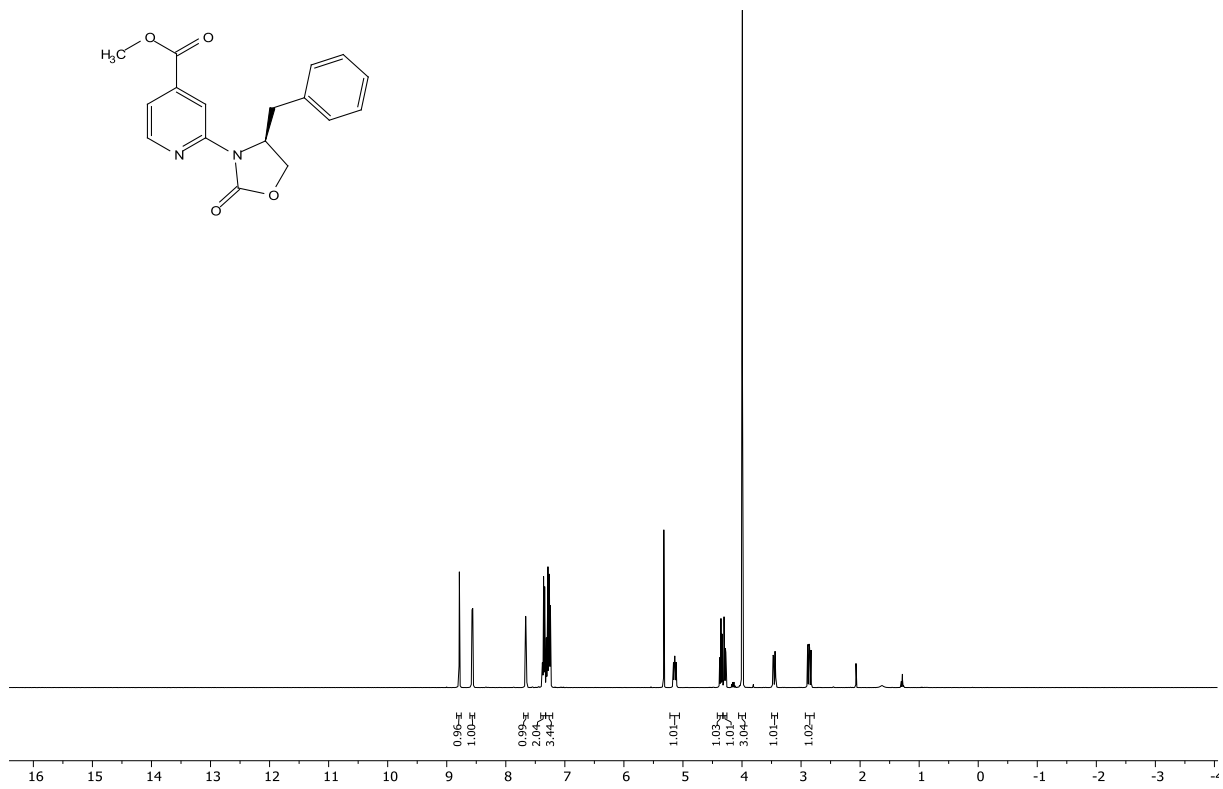

$^{13}\text{C}\{^1\text{H}\}$  NMR (101 MHz, Chloroform)

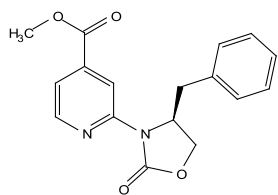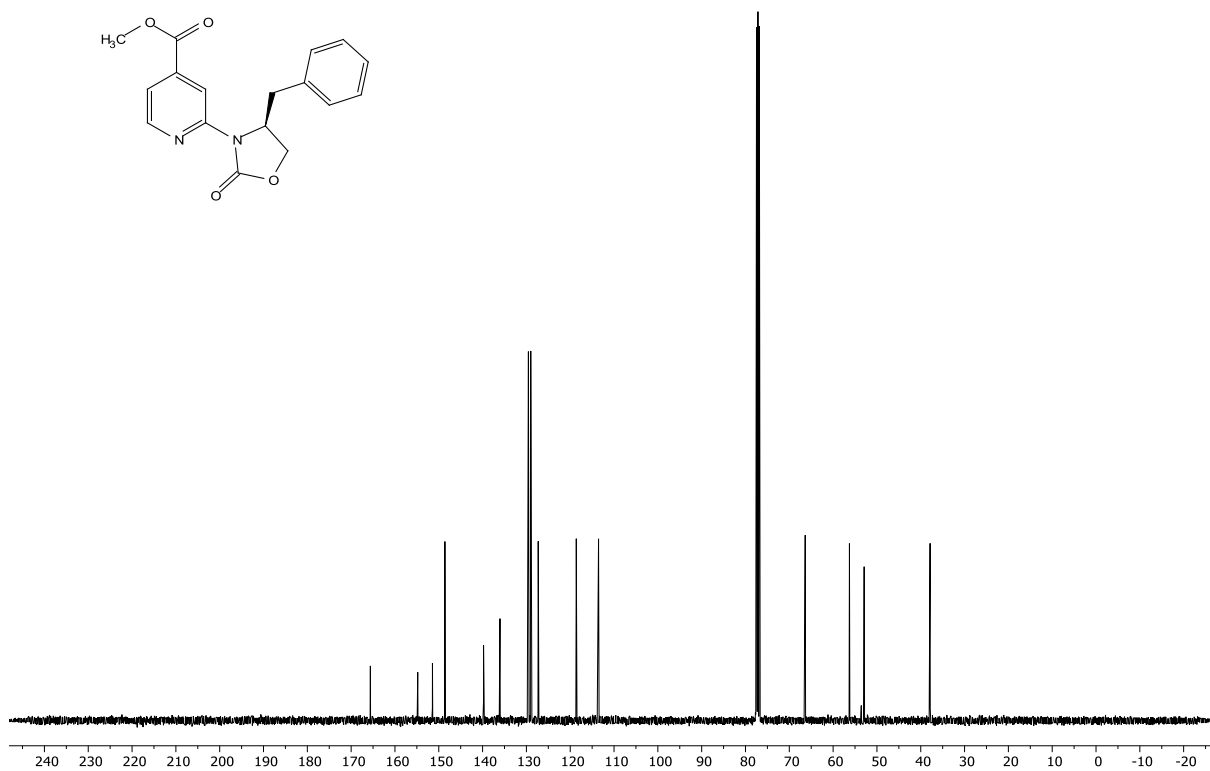

$^1\text{H}$  NMR (400 MHz, Chloroform)

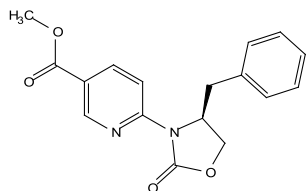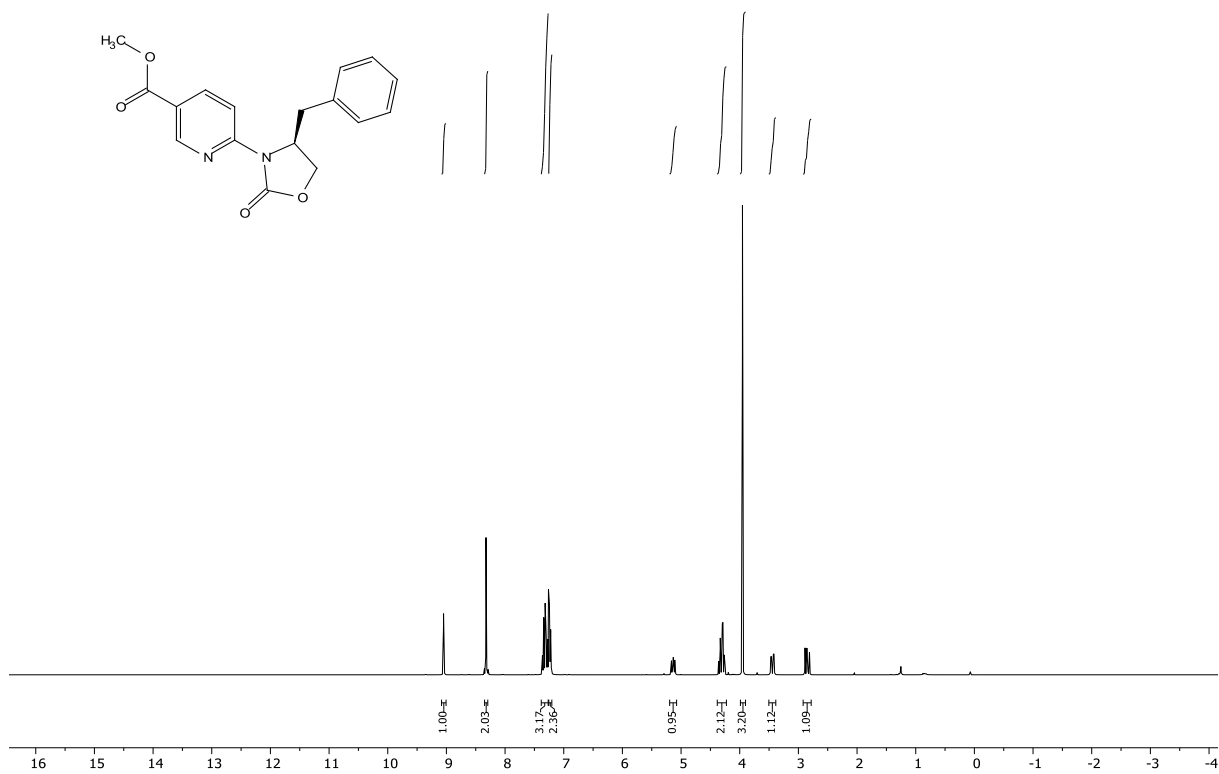



$^{13}\text{C}\{^1\text{H}\}$  NMR (101 MHz, Chloroform- $d_3$ )

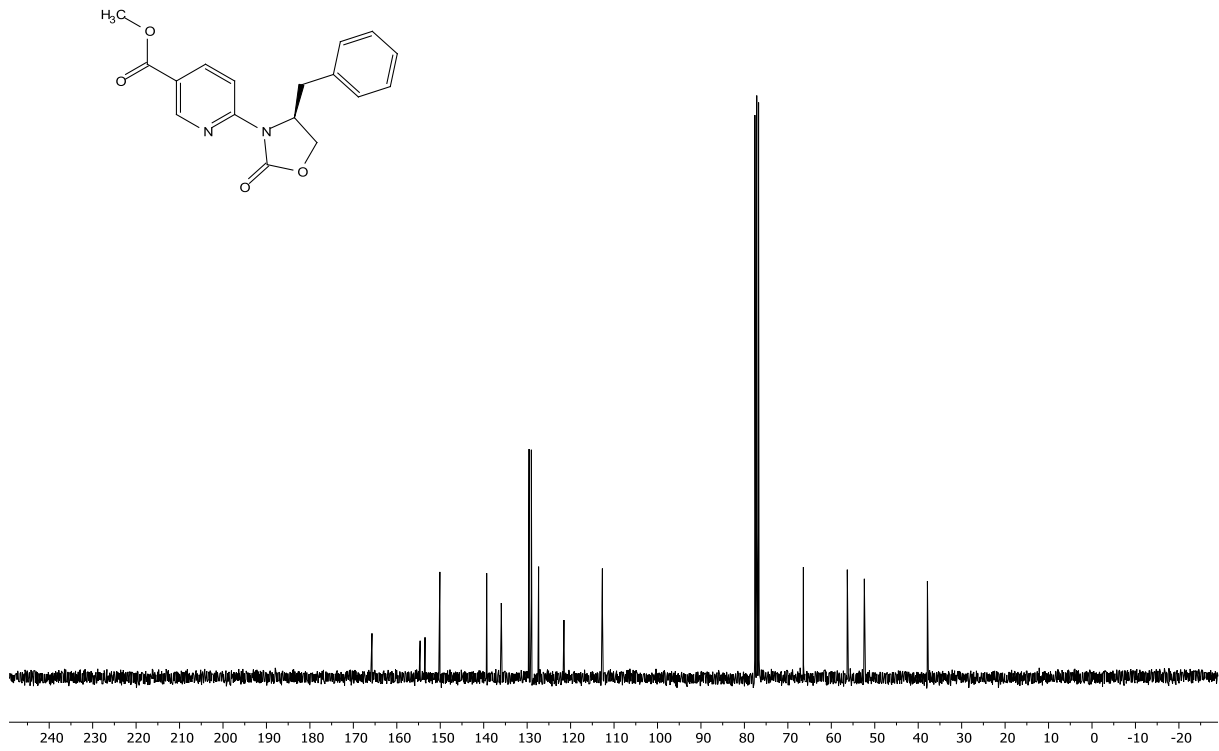

$^1\text{H}$  NMR (300 MHz, Chloroform- $d_3$ )

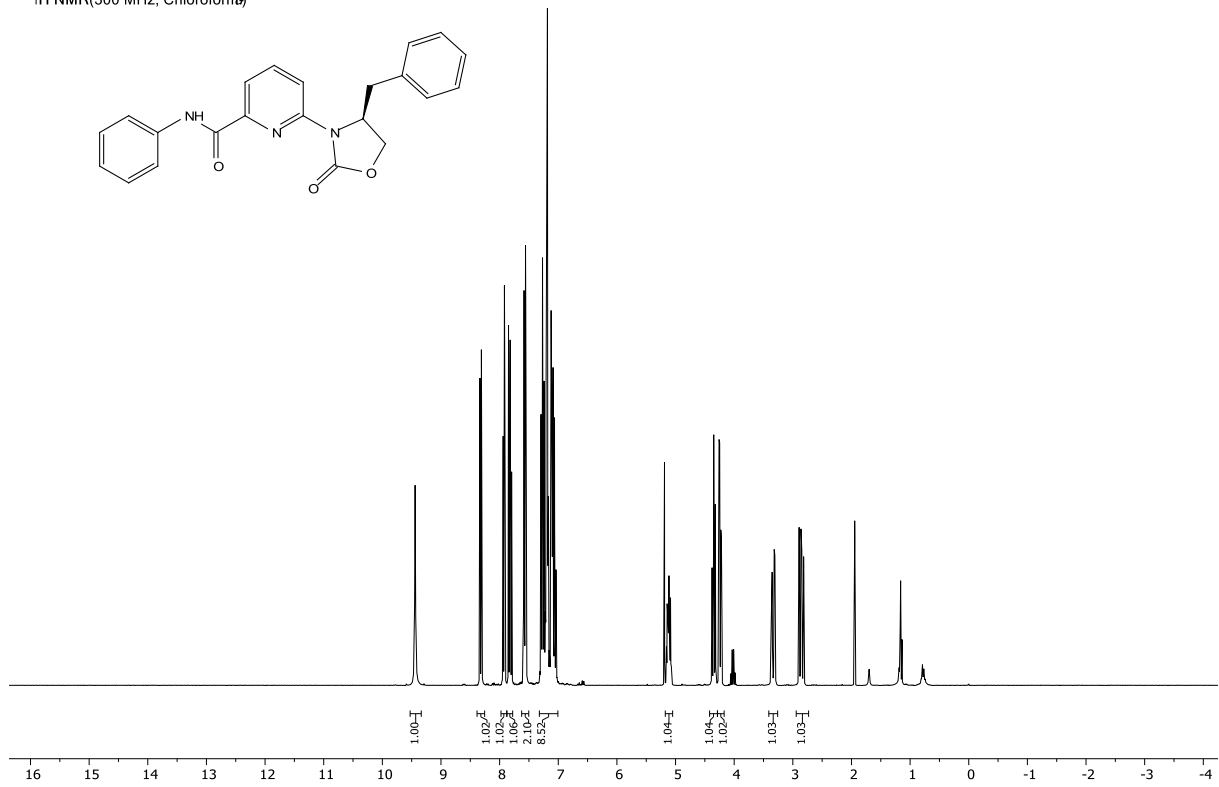

$^{13}\text{C}\{^1\text{H}\}$  NMR(75 MHz, Chloroform)

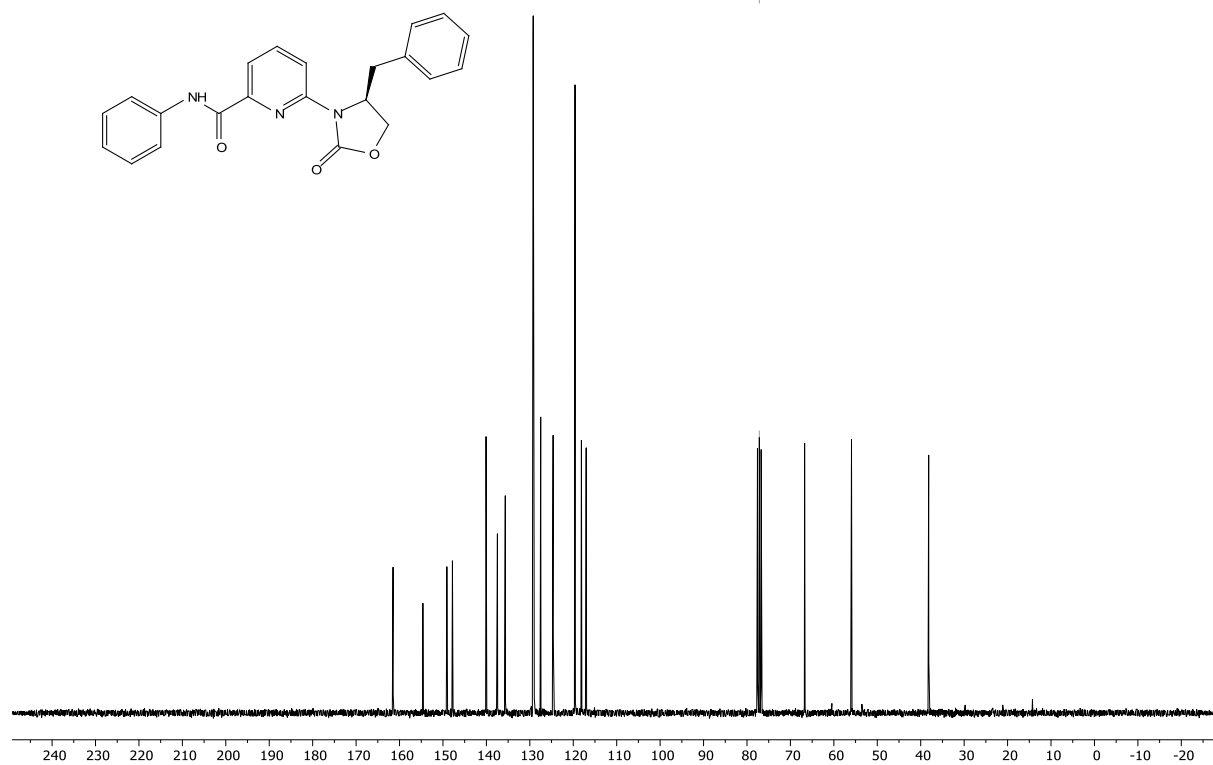

$^1\text{H}$  NMR(400 MHz, Chloroform)

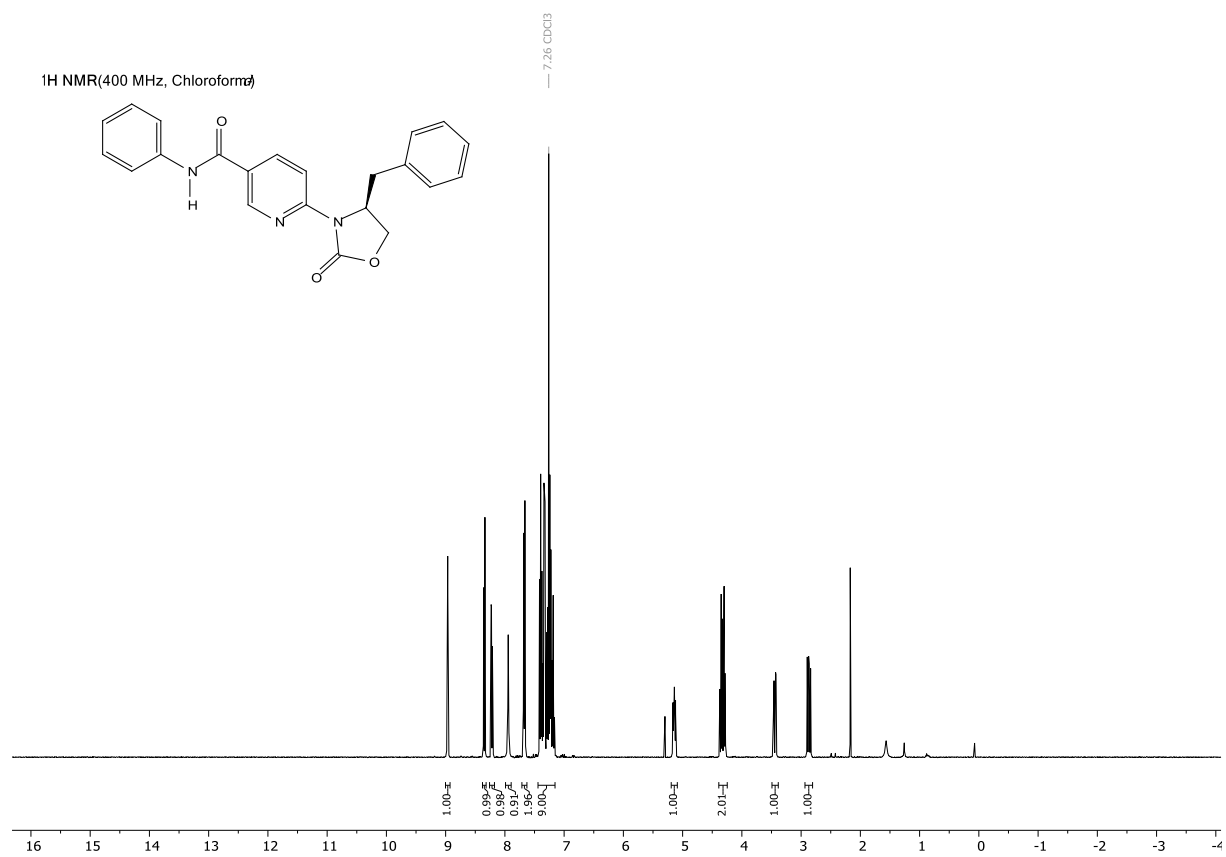

$^{13}\text{C}\{^1\text{H}\}$  NMR (101 MHz, Chloroform)

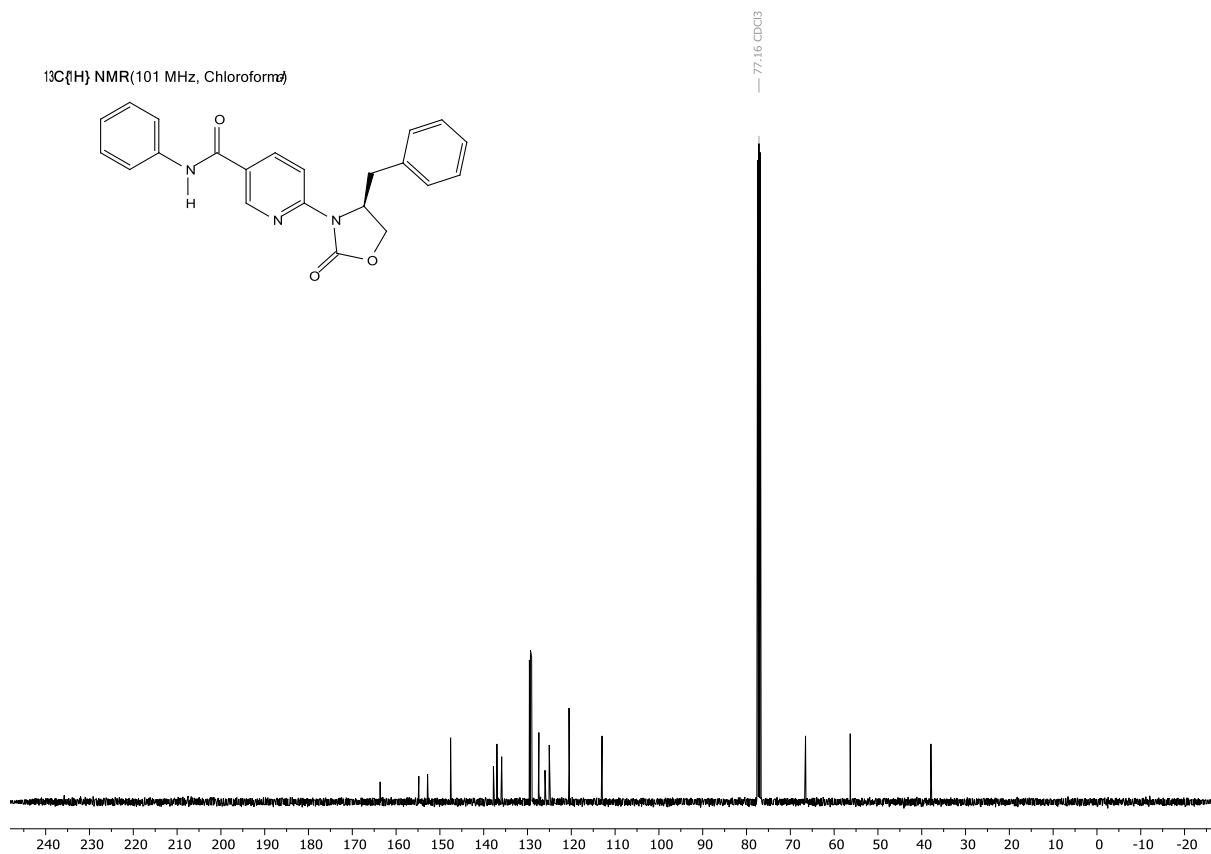

$^1\text{H}$  NMR (400 MHz, Chloroform)

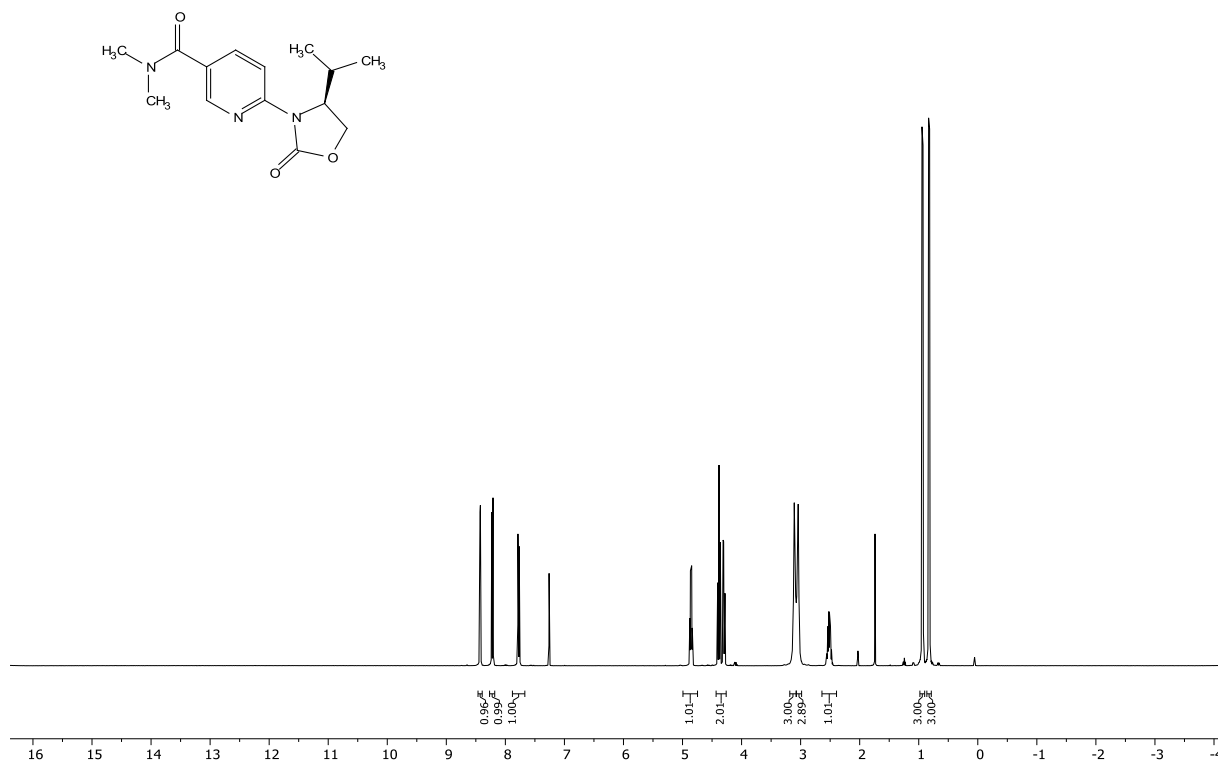

$^{13}\text{C}\{^1\text{H}\}$  NMR(101 MHz, Chloroform- $d_3$ )

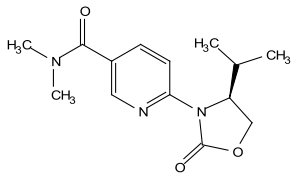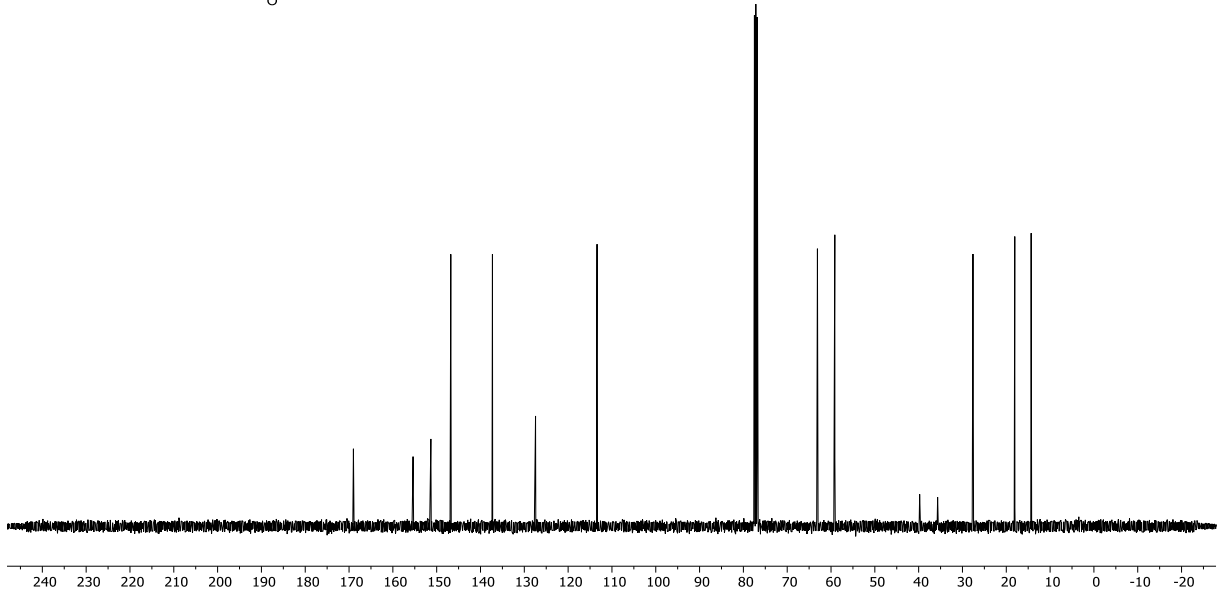

$^1\text{H}$  NMR(400 MHz, Chloroform- $d_3$ )

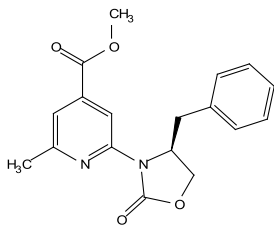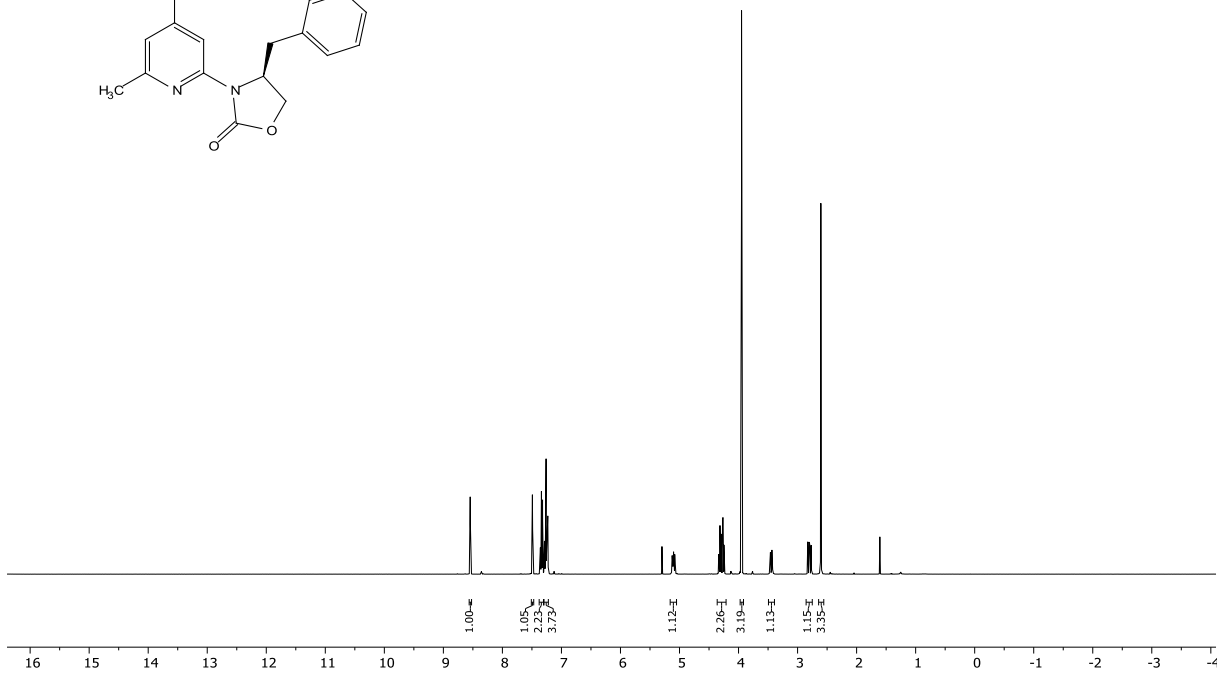

$^{13}\text{C}\{^1\text{H}\}$  NMR (101 MHz, Chloroform- $d_3$ )

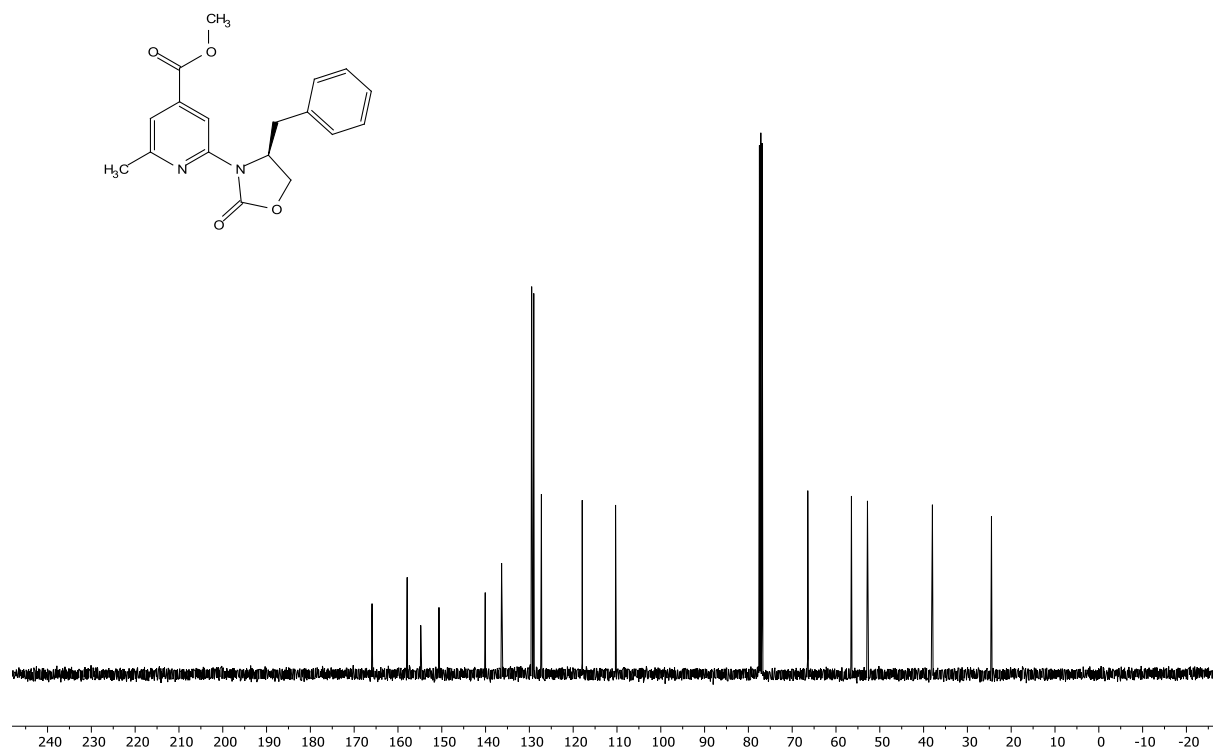

$^1\text{H}$  NMR (400 MHz, Chloroform- $d_3$ )

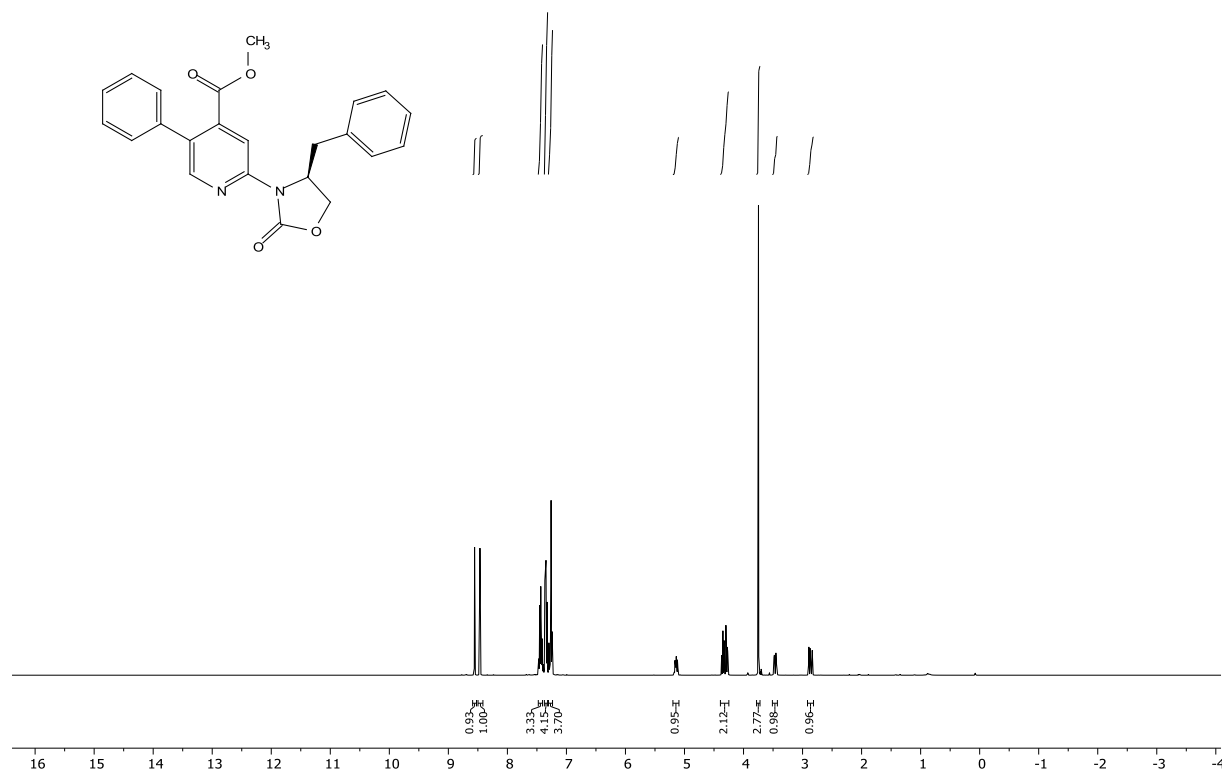

$^{13}\text{C}\{^1\text{H}\}$  NMR(101 MHz, Chloroform)

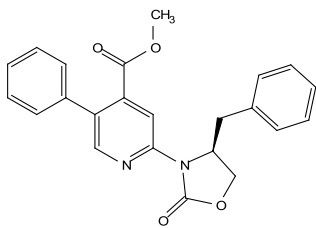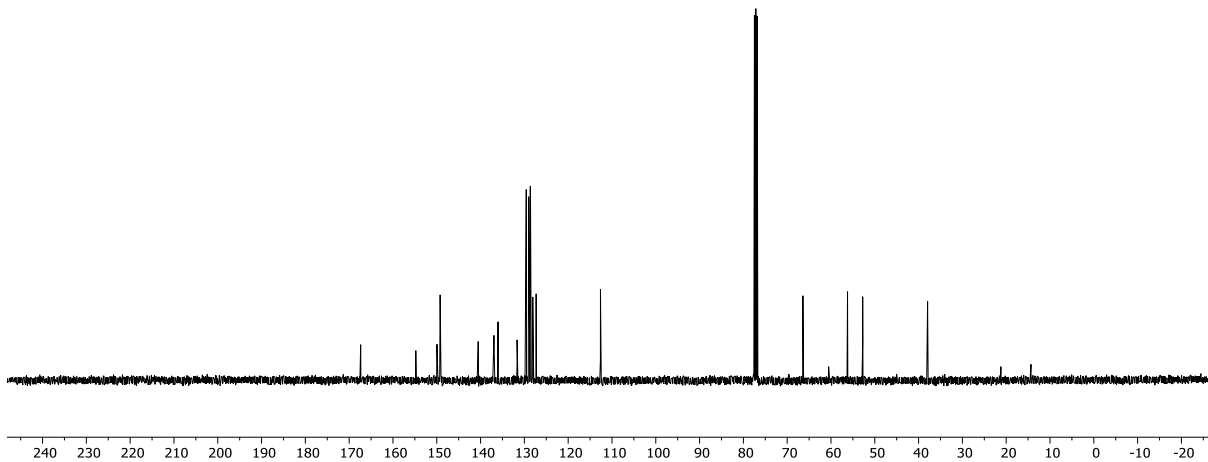

$^1\text{H}$  NMR(400 MHz, Chloroform)

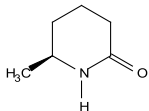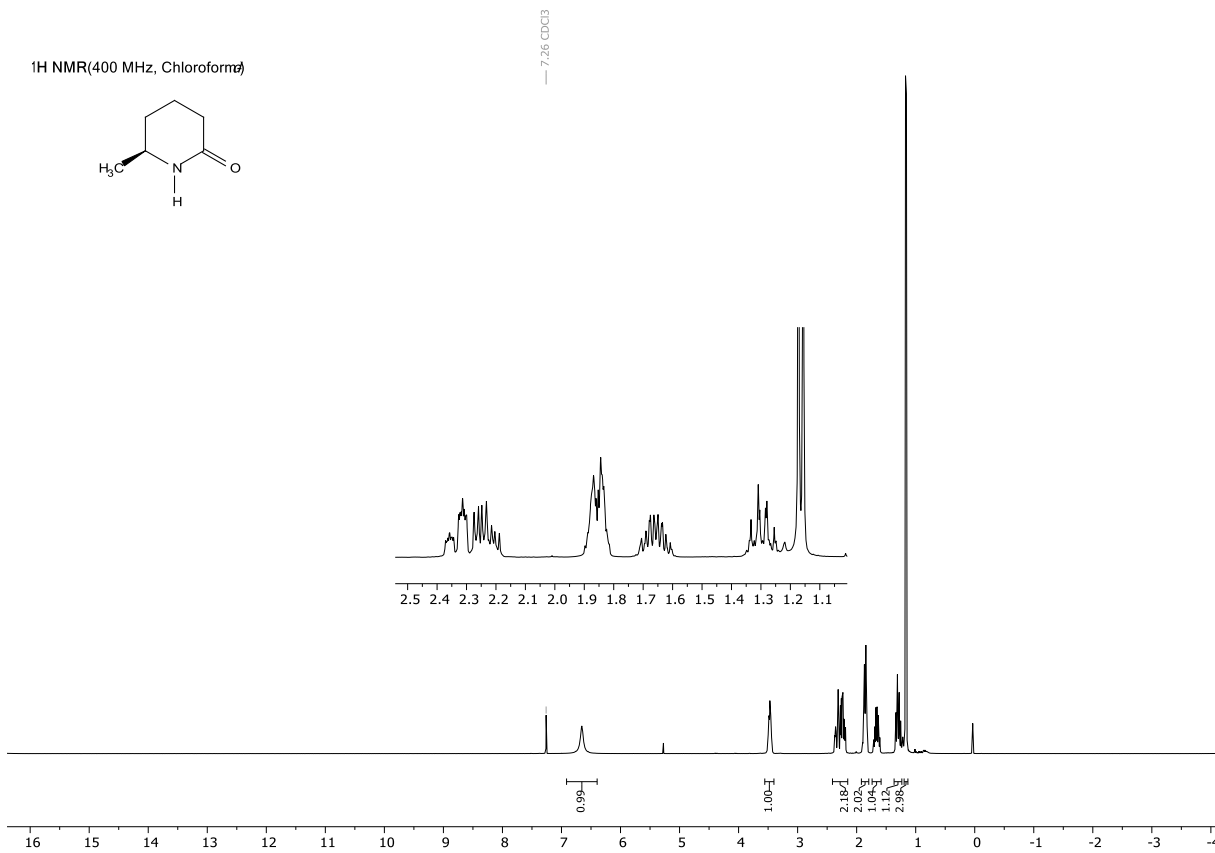

$^{13}\text{C}\{^1\text{H}\}$  NMR (101 MHz, Chloroform)

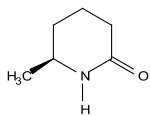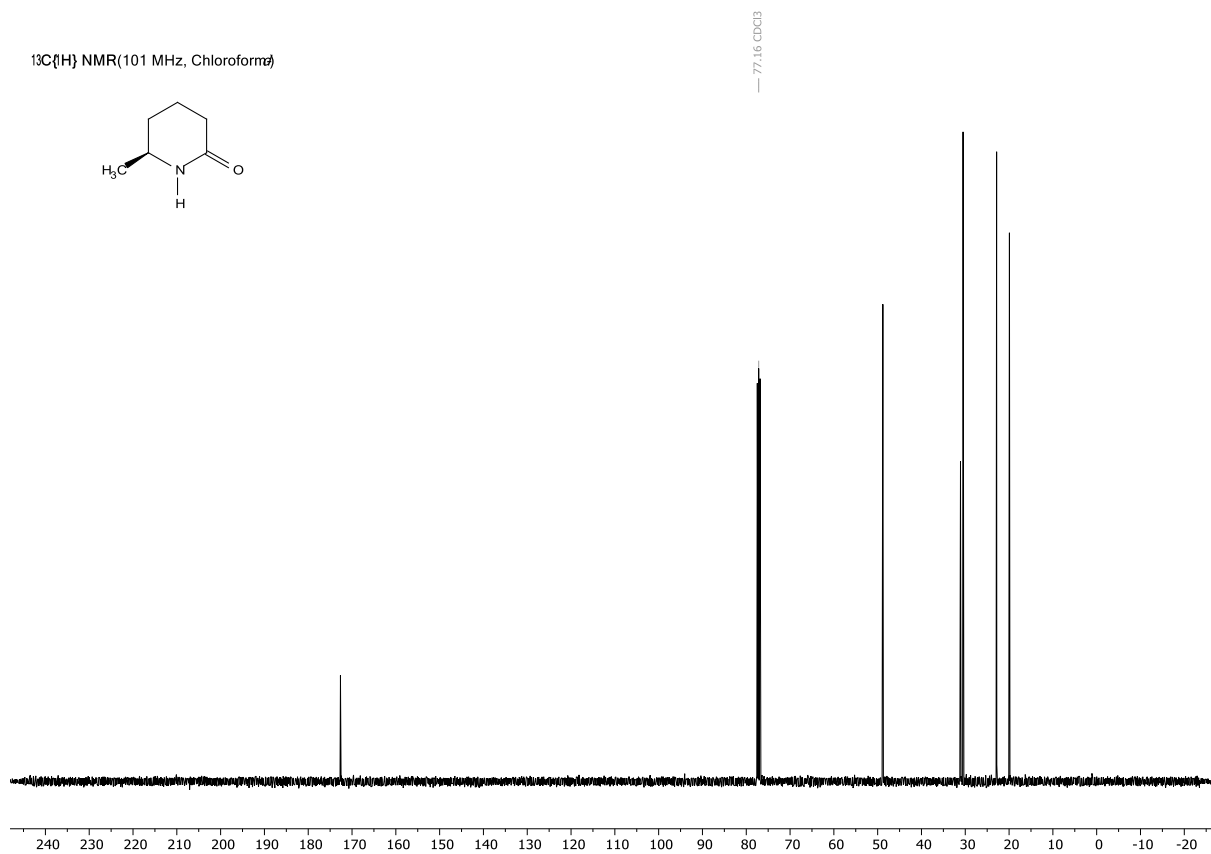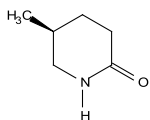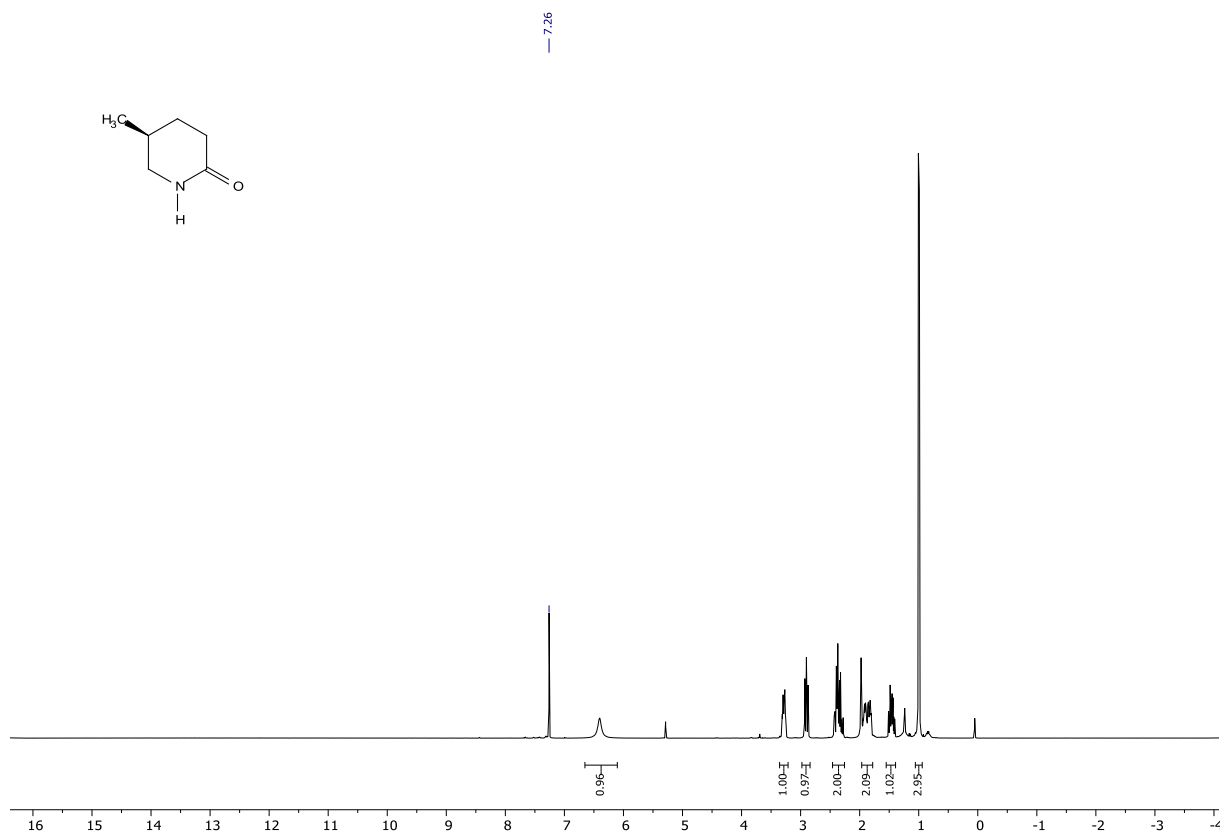

$^{13}\text{C}\{^1\text{H}\}$  NMR (101 MHz, Chloroform- $d_3$ )

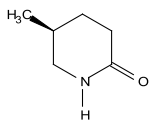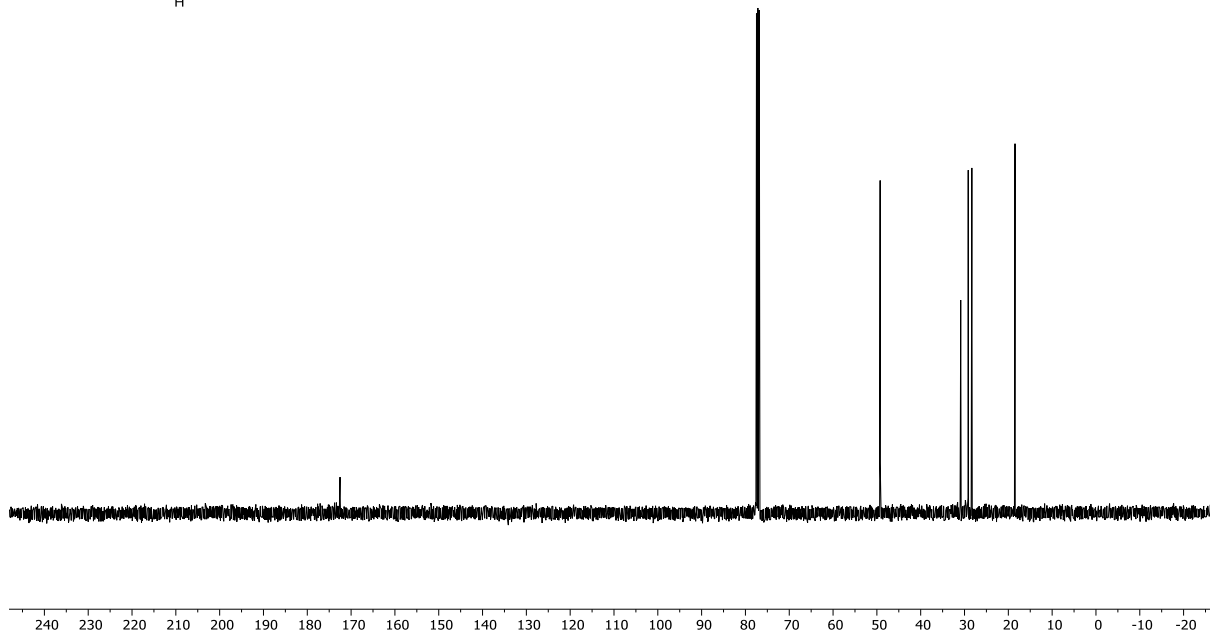

$^1\text{H}$  NMR (400 MHz, Chloroform- $d_3$ )

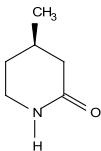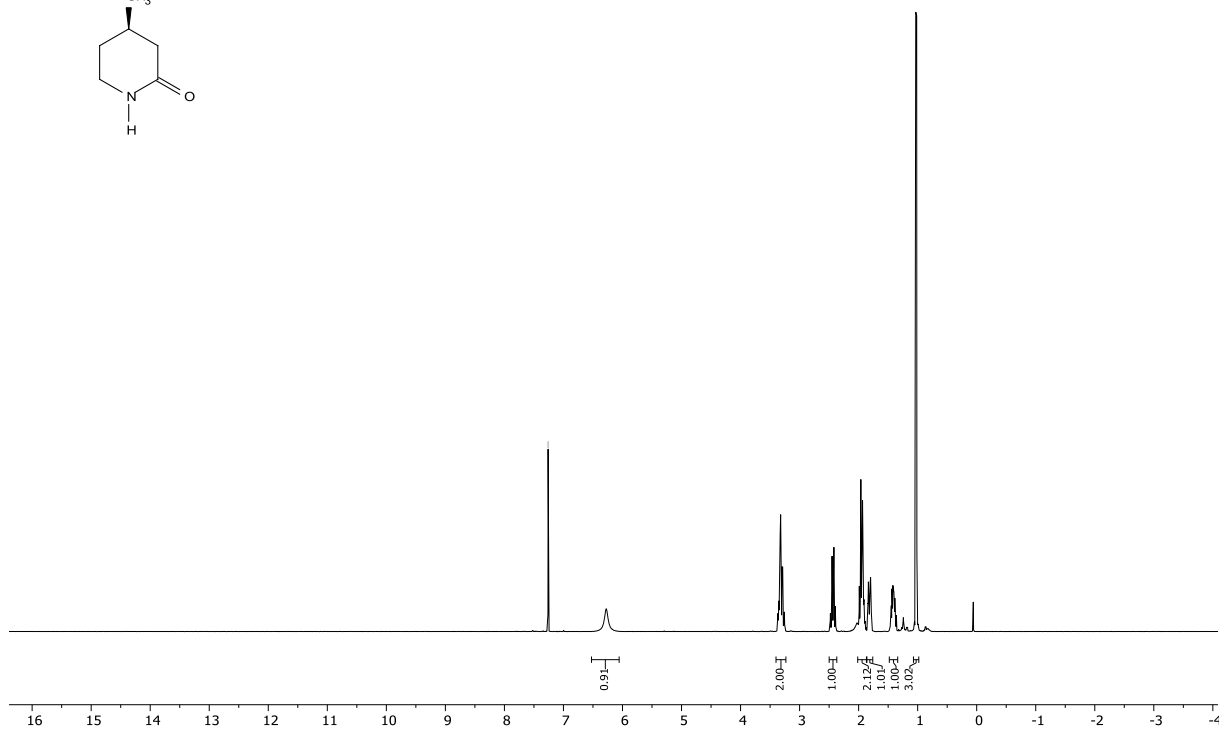



$^{13}\text{C}\{^1\text{H}\}$  NMR(101 MHz, Chloroform $d_3$ )

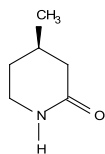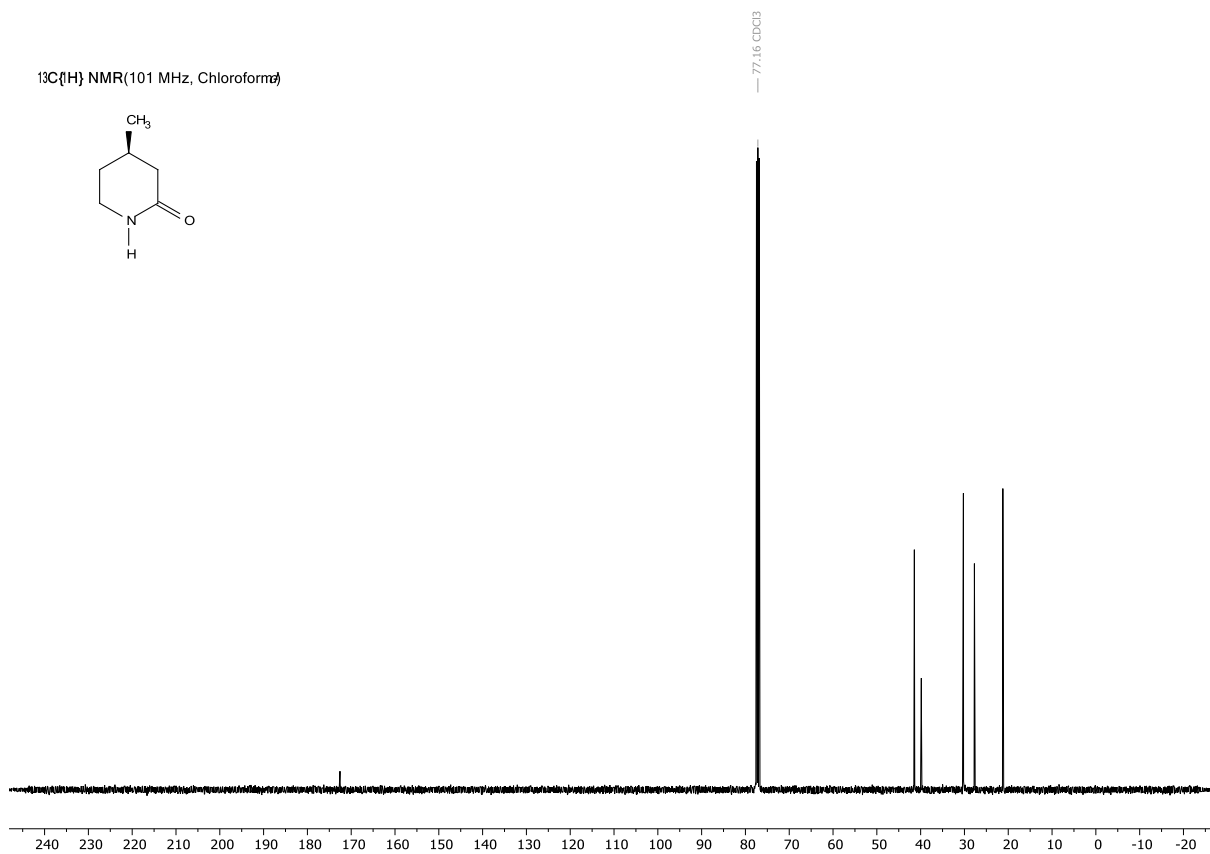

$^1\text{H}$  NMR(400 MHz, Chloroform $d_3$ )

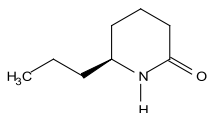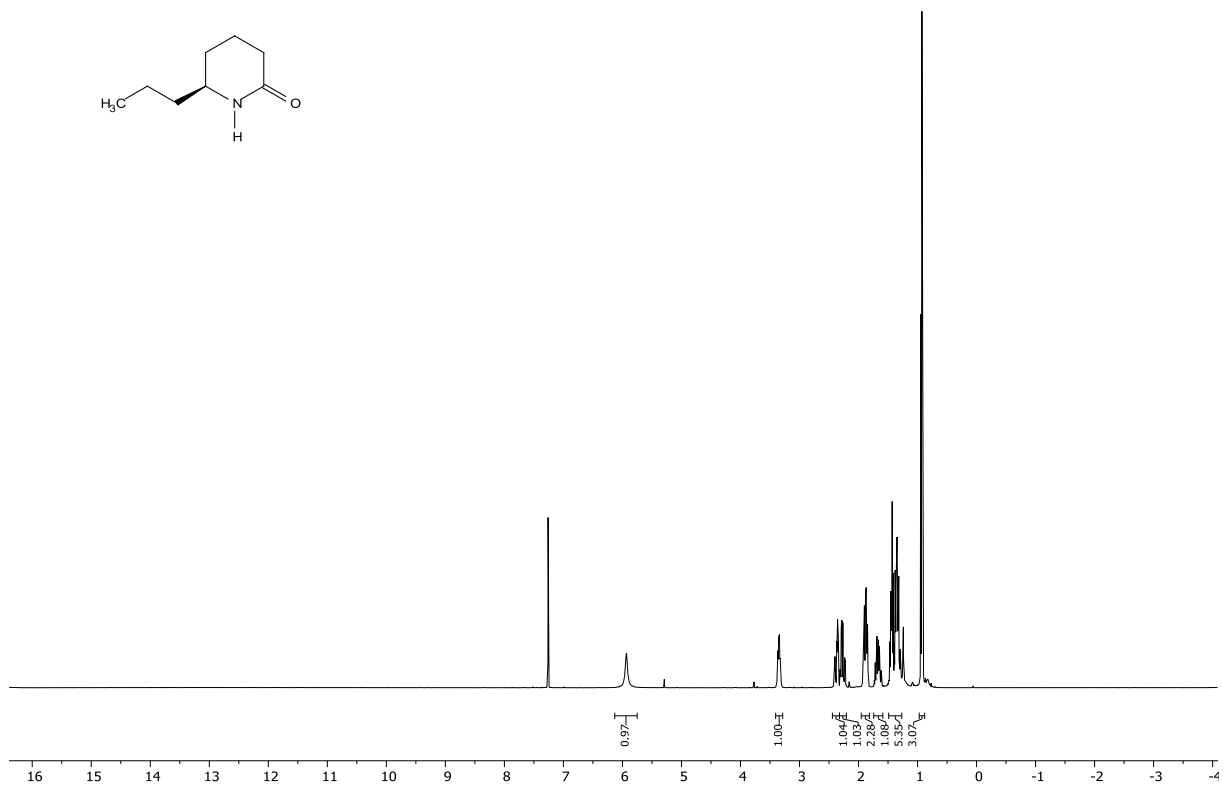

$^{13}\text{C}\{^1\text{H}\}$  NMR (101 MHz, Chloroform- $d_3$ )

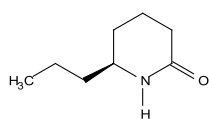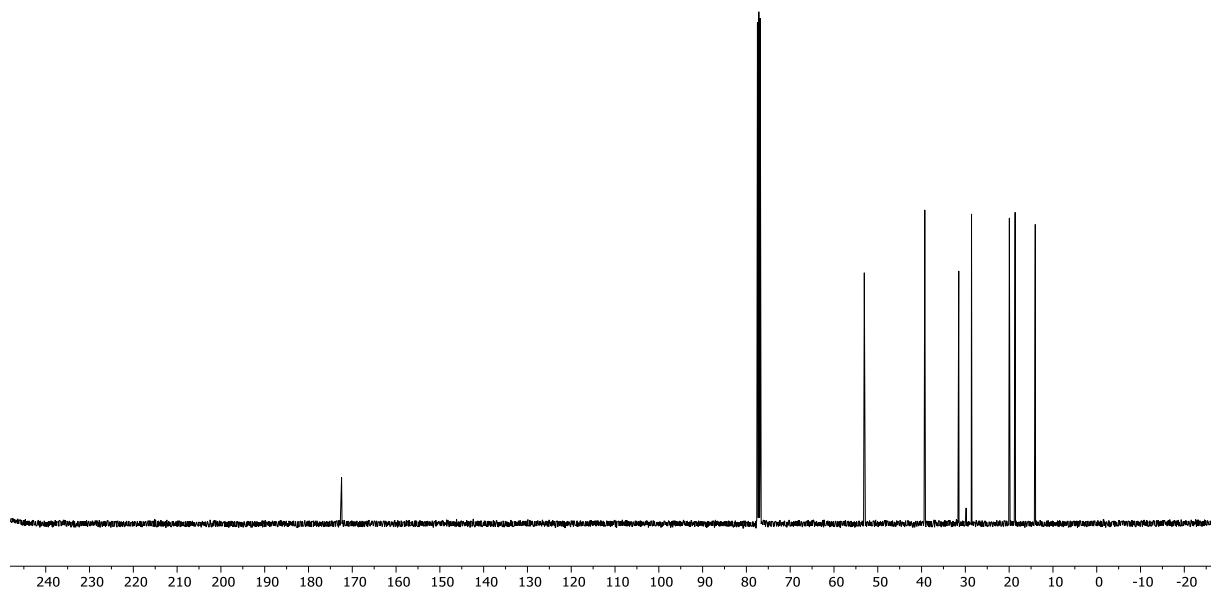

— 7.26 CDCl<sub>3</sub>

$^1\text{H}$  NMR (400 MHz, Chloroform- $d_3$ )

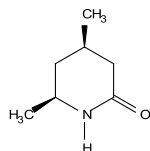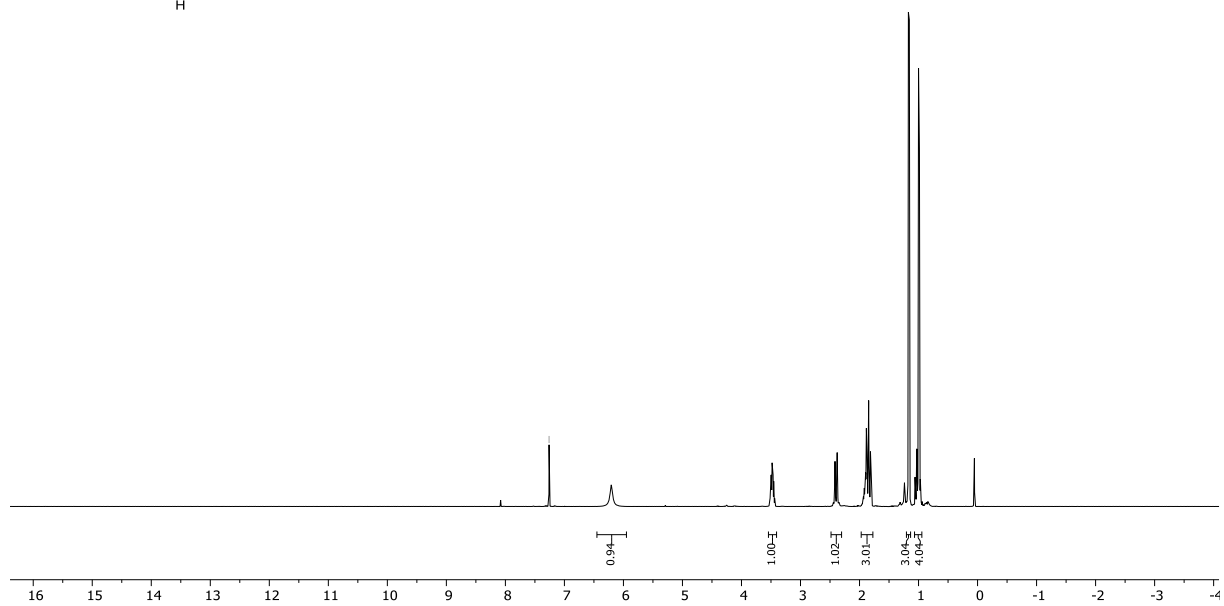

$^{13}\text{C}\{^1\text{H}\}$  NMR(101 MHz, Chloroform $d$ )

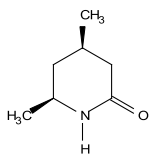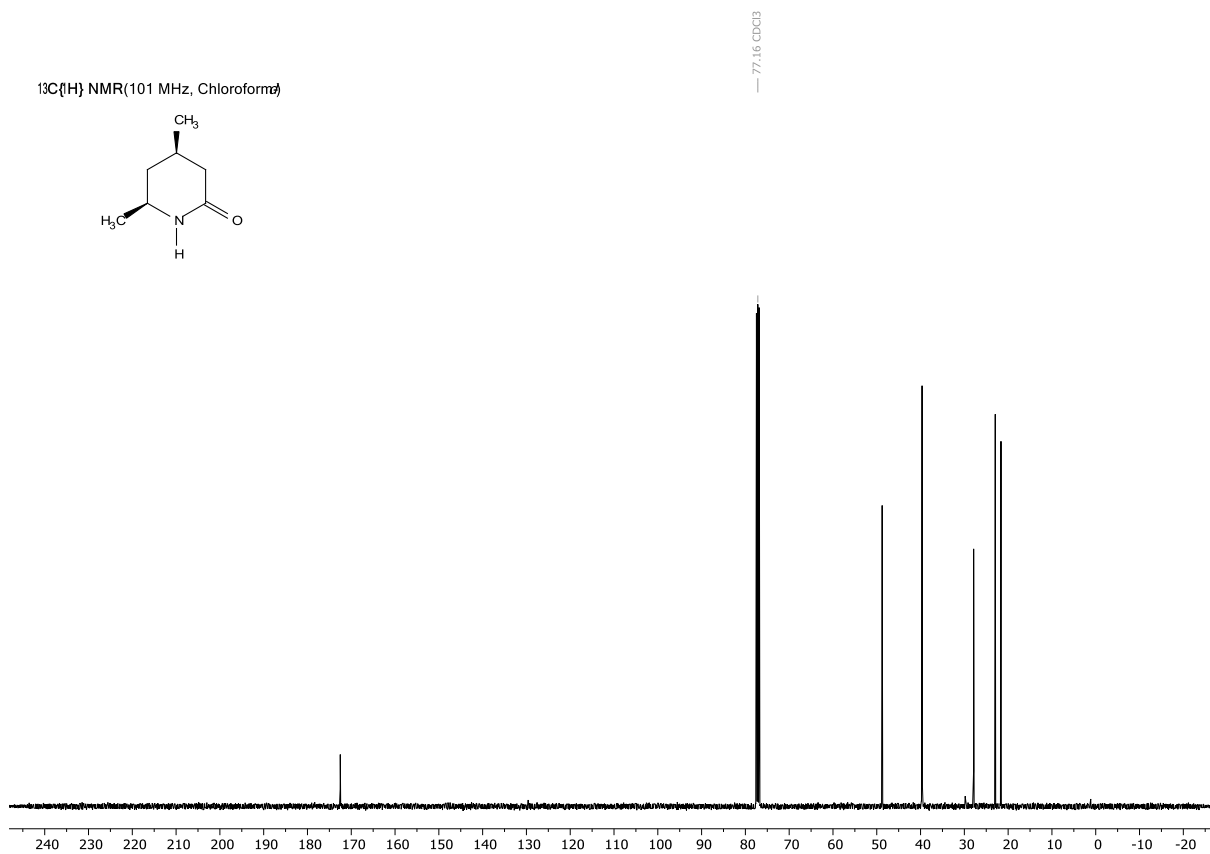

$^1\text{H}$  NMR(400 MHz, Chloroform $d$ )

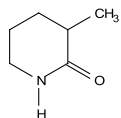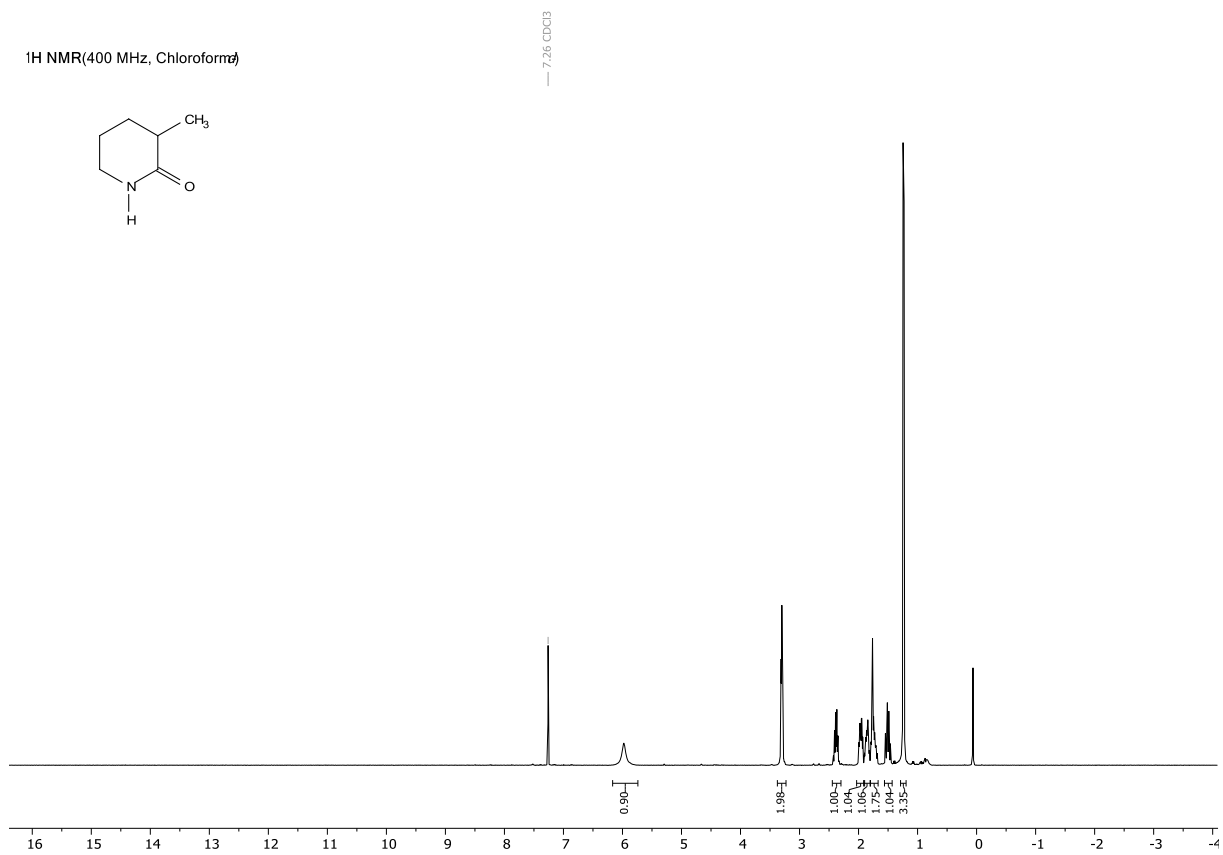

$^{13}\text{C}\{^1\text{H}\}$  NMR (101 MHz, Chloroform)

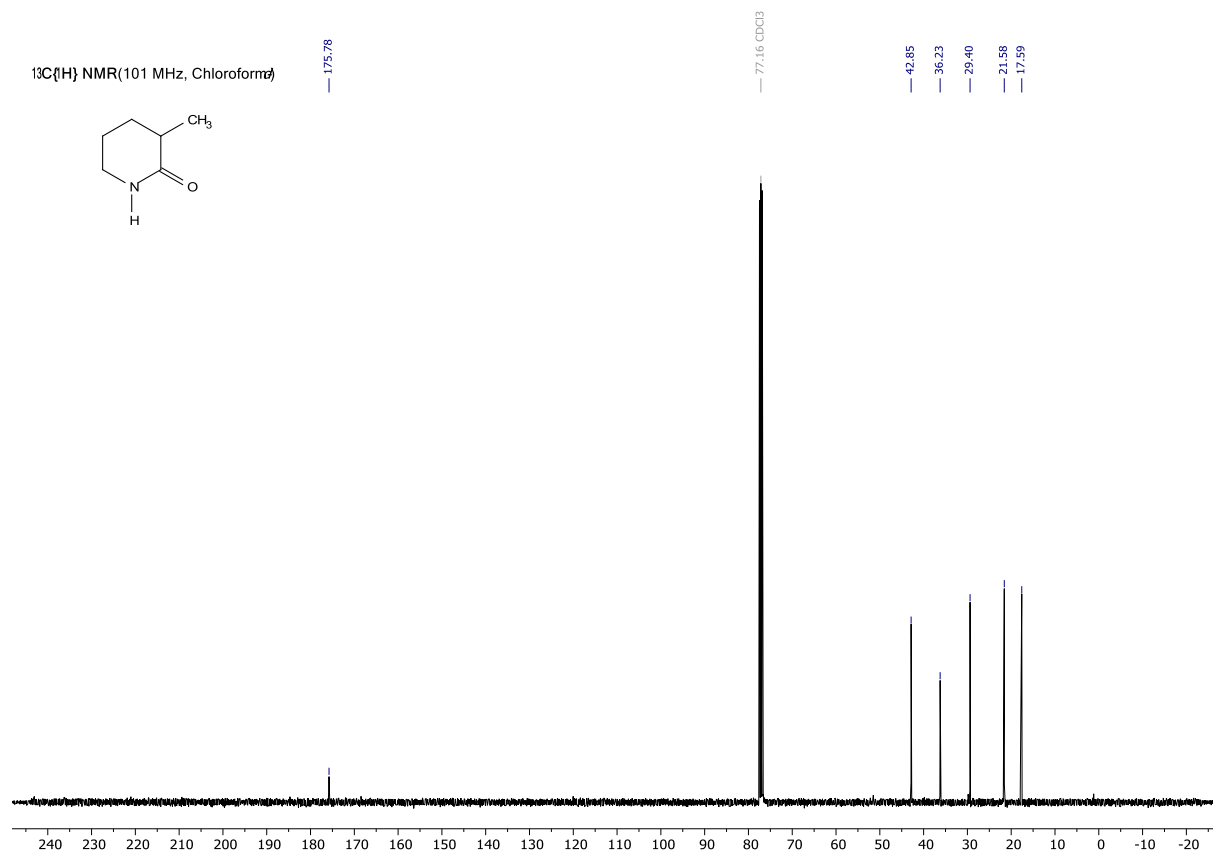

$^1\text{H}$  NMR (400 MHz, Chloroform)

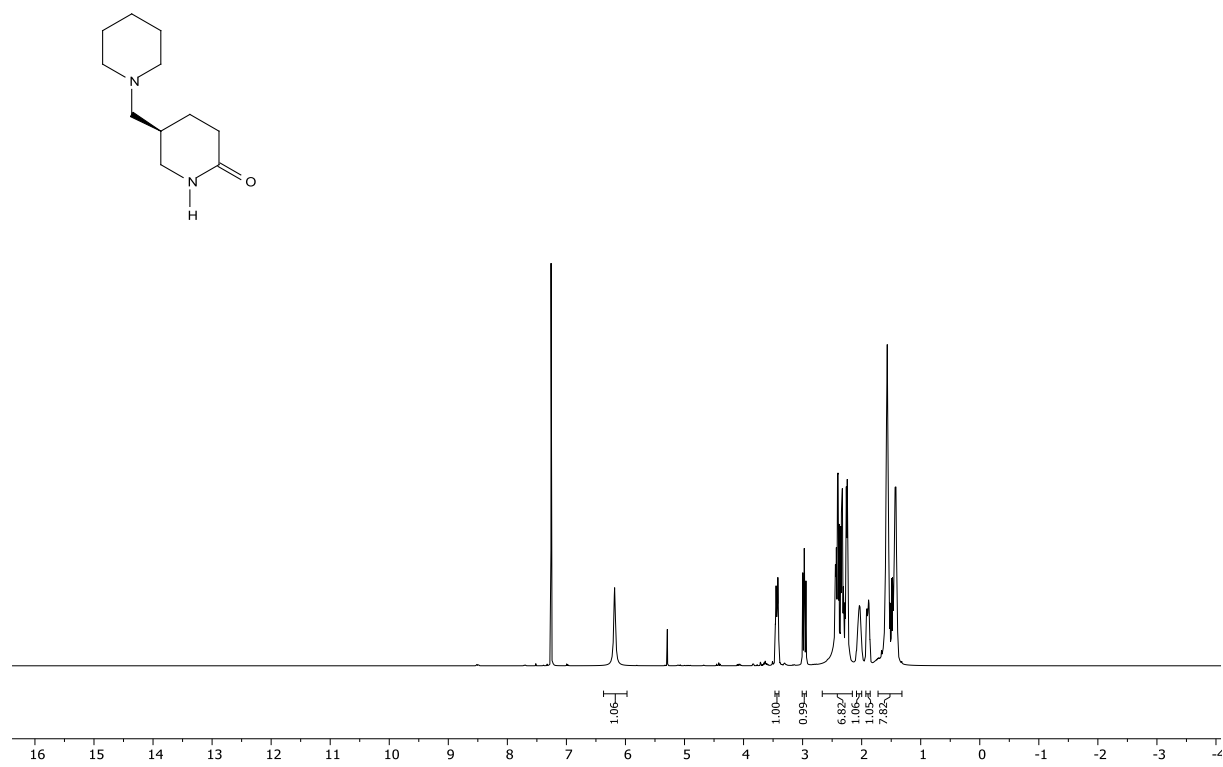

$^{13}\text{C}\{^1\text{H}\}$  NMR (101 MHz, Chloroform- $d_3$ )

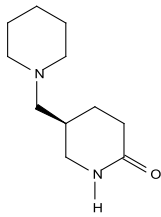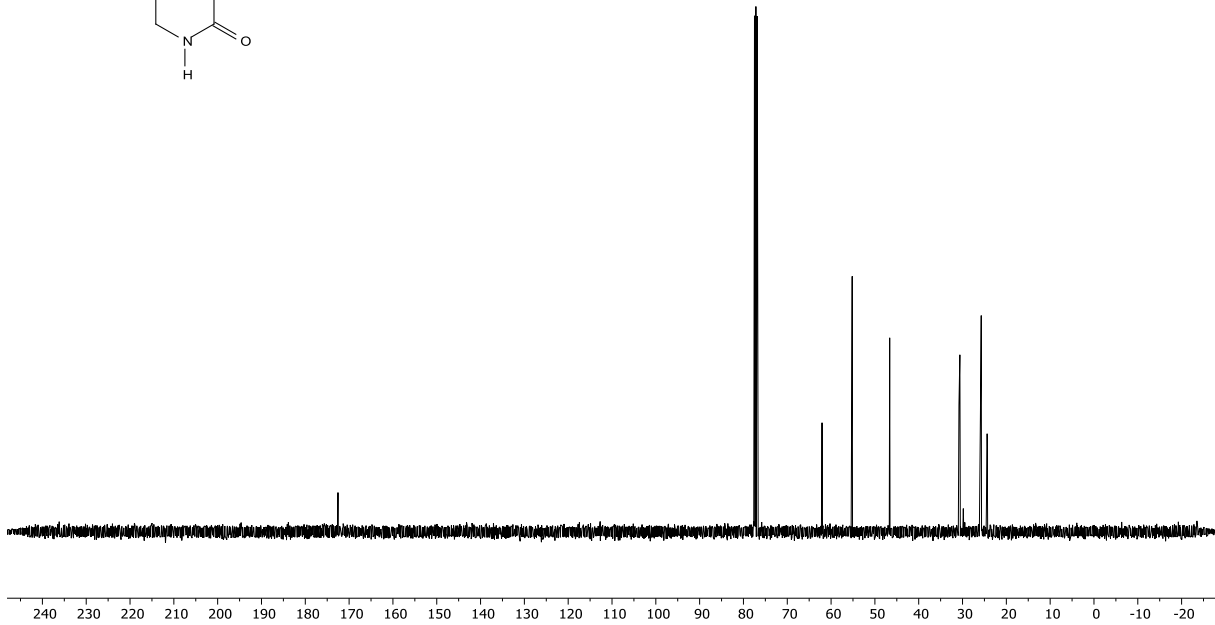

$^1\text{H}$  NMR (400 MHz, Chloroform- $d_3$ )

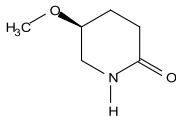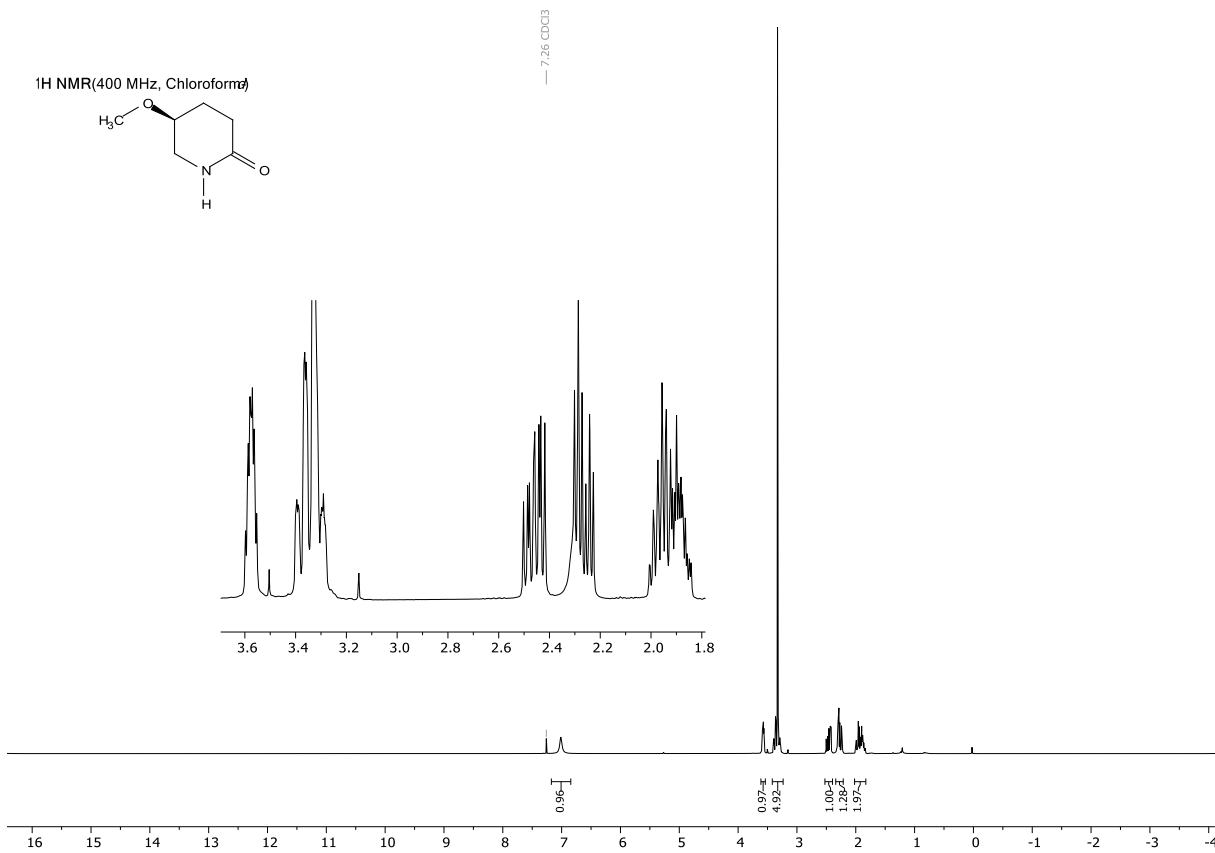

<sup>13</sup>C{<sup>1</sup>H} NMR (101 MHz, Chloroform<sub>d</sub>)

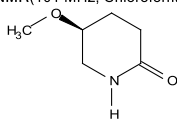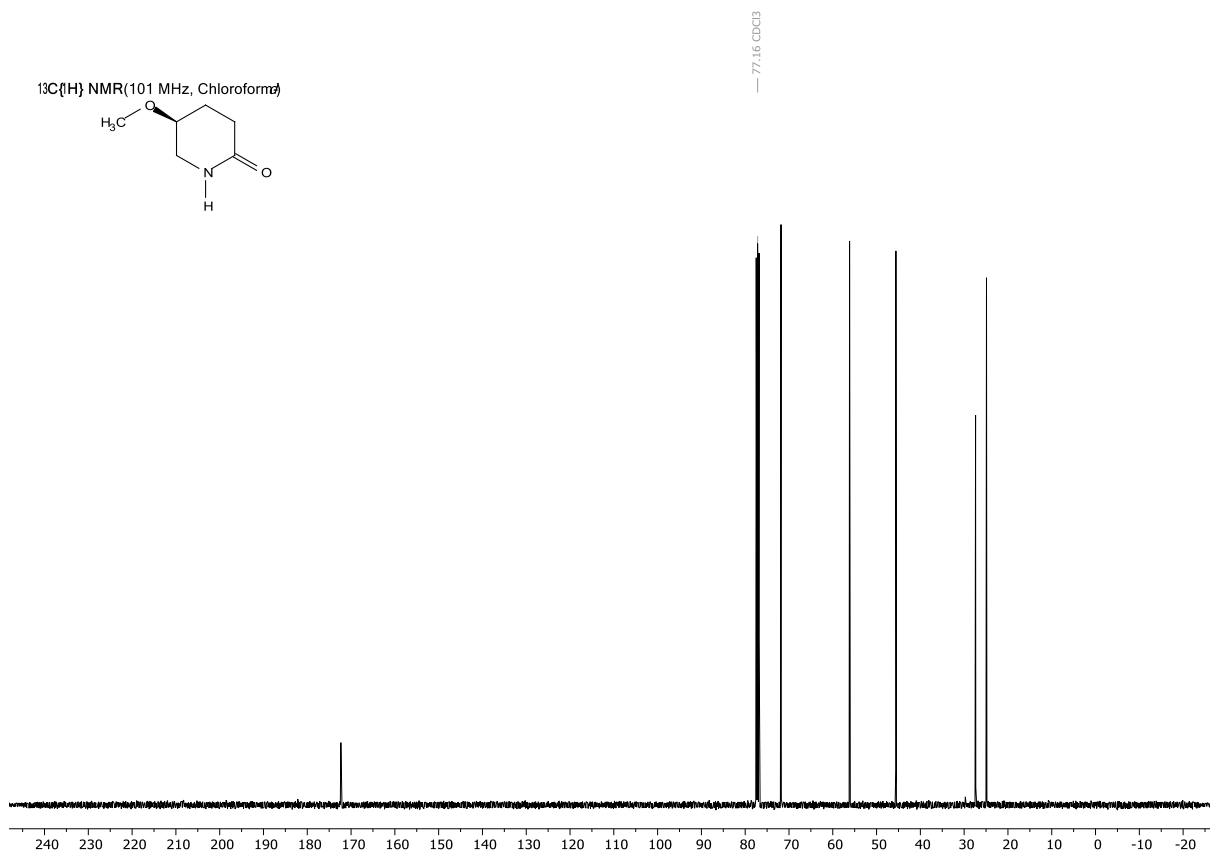

<sup>1</sup>H NMR (400 MHz, Chloroform<sub>d</sub>)

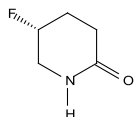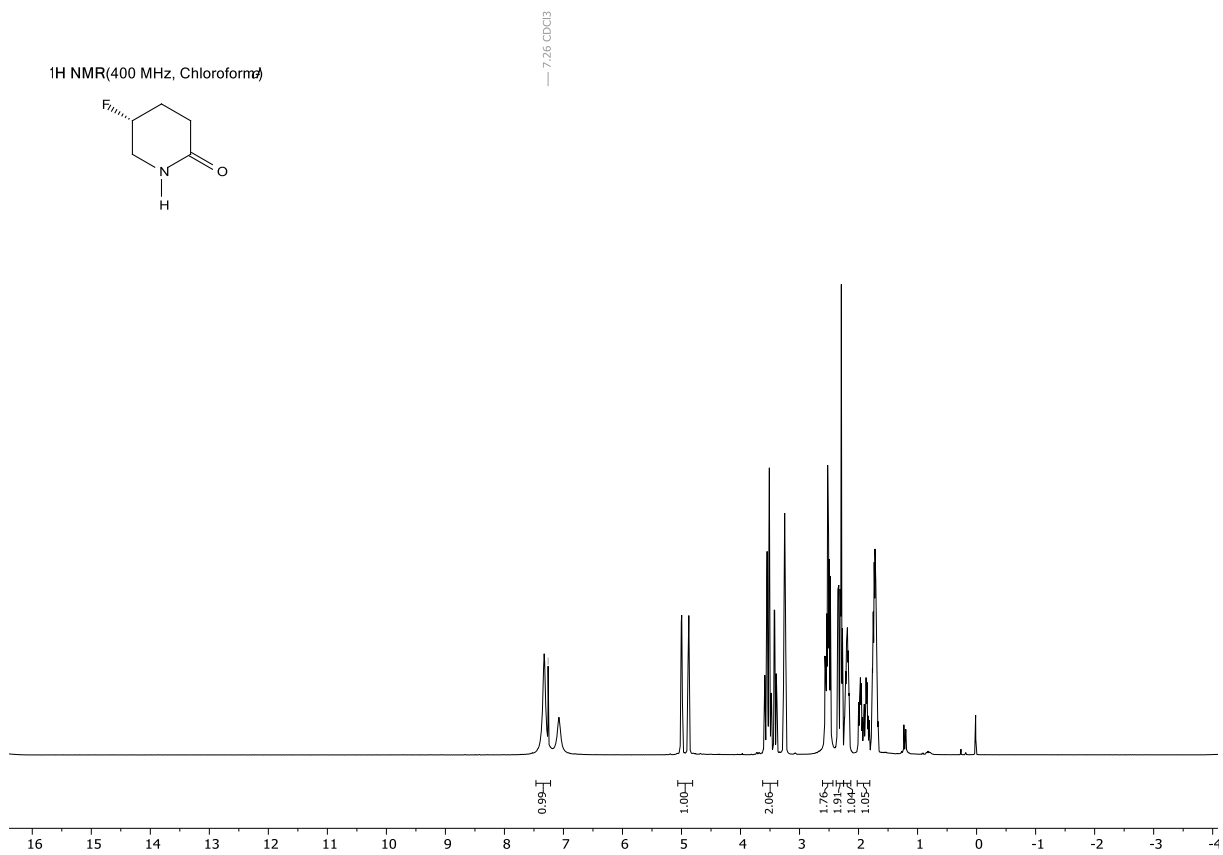

$^{13}\text{C}\{^1\text{H}\}$  NMR (101 MHz, Chloroform)

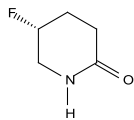

171.73

84.91  
83.21  
77.16 CDCl<sub>3</sub>

46.69  
46.45

26.18  
25.69  
25.48

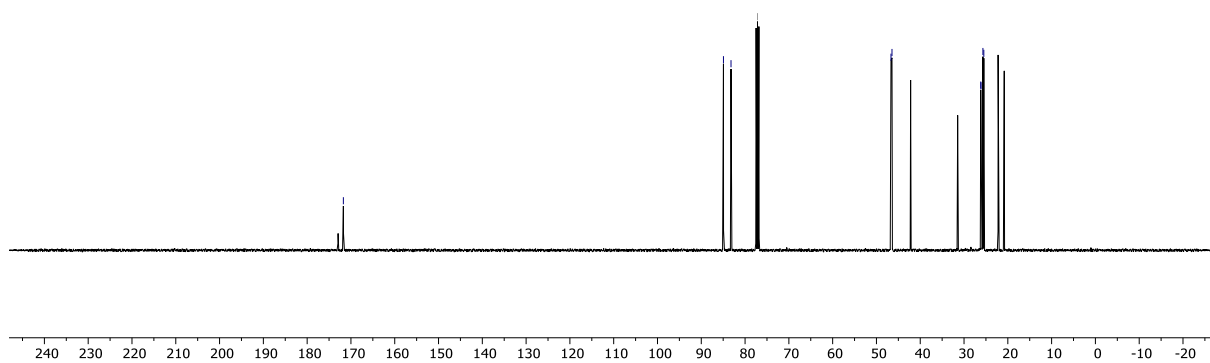

$^{19}\text{F}\{^1\text{H}\}$  NMR (376 MHz, Chloroform)

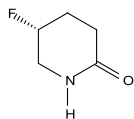

-187.07

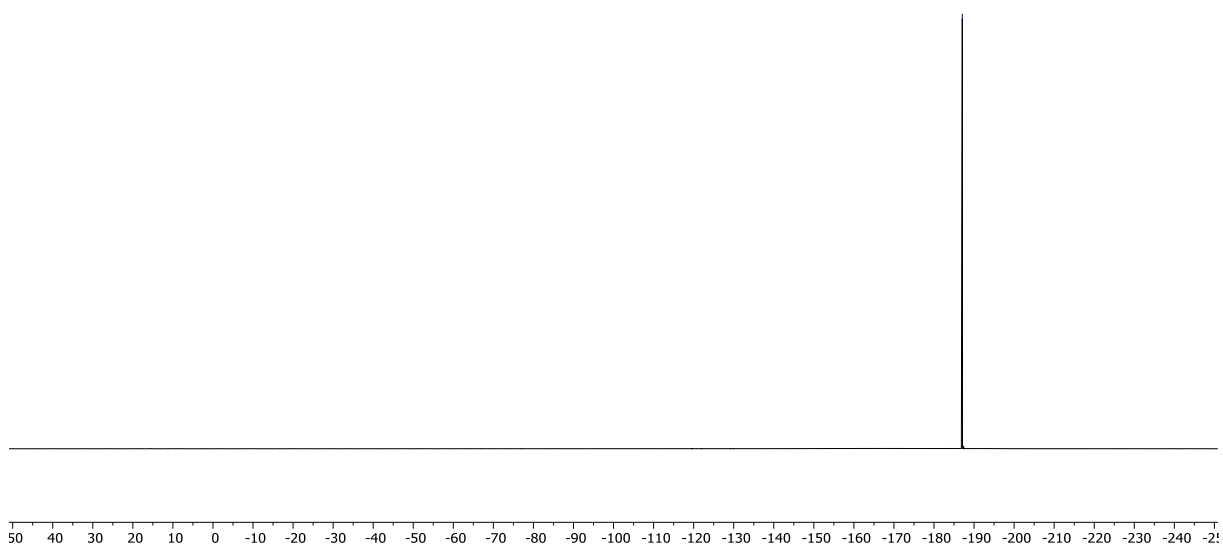

<sup>1</sup>H NMR(400 MHz, Chloroform-d)

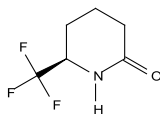

— 77.26 CDCl<sub>3</sub>

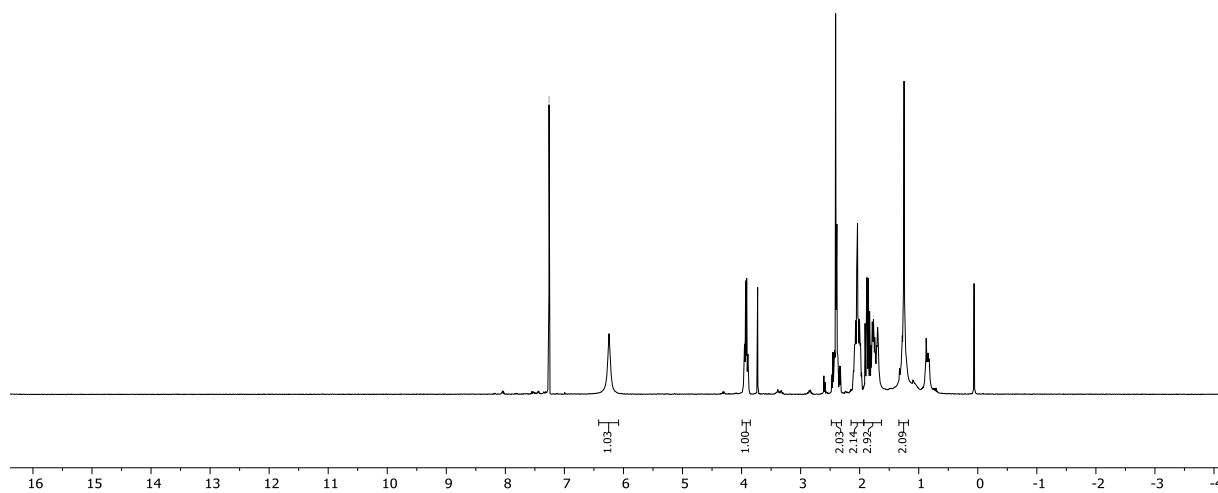

<sup>13</sup>C{<sup>1</sup>H} NMR(101 MHz, Chloroform-d)

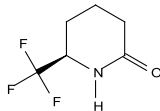

— 77.16 CDCl<sub>3</sub>

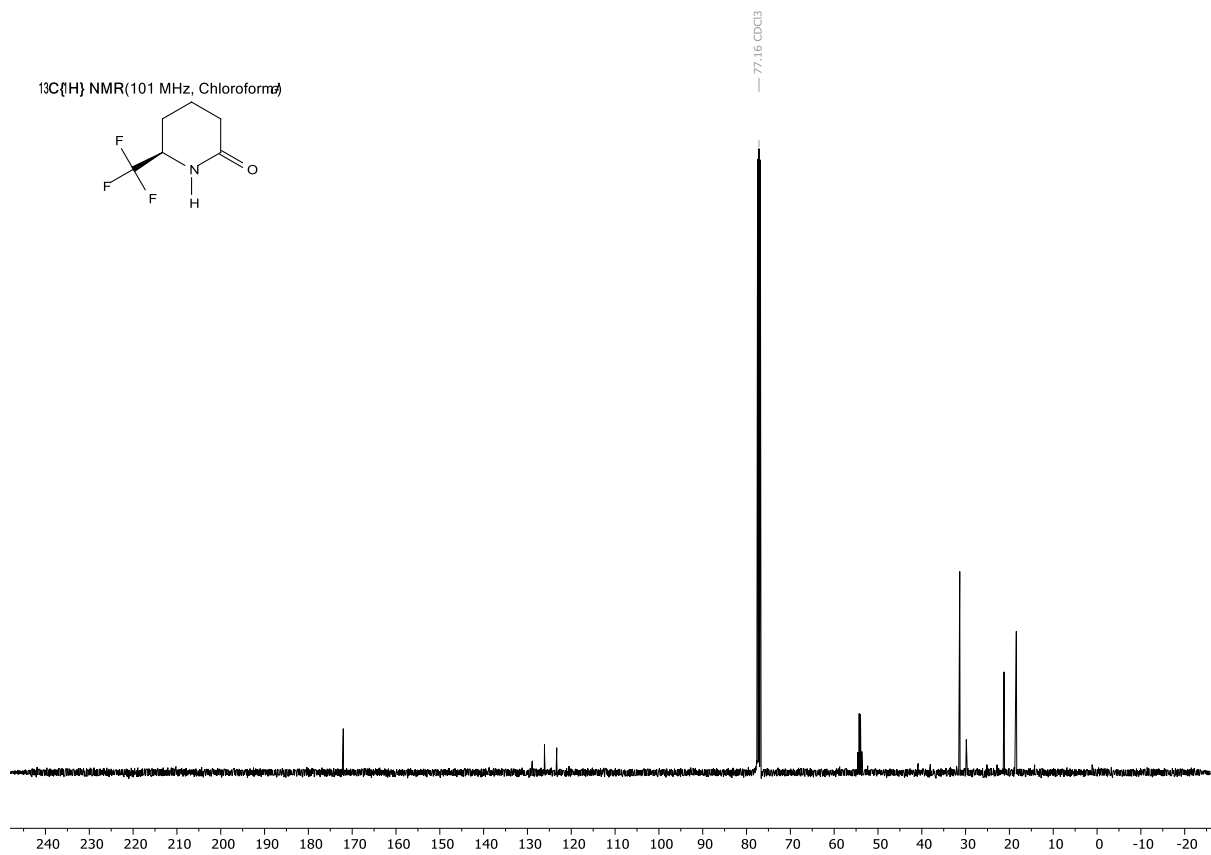



$^{19}\text{F}\{^1\text{H}\}$  NMR(376 MHz, Chloroform $d$ )

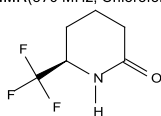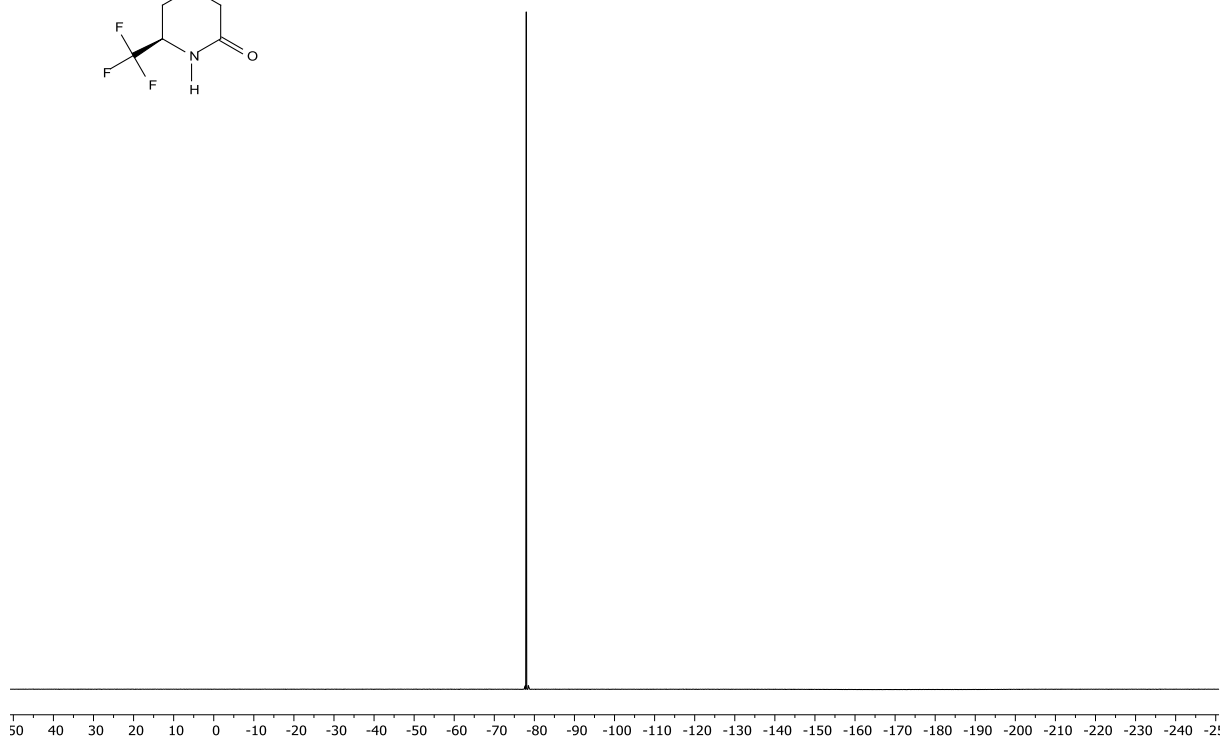

— 7.26 CDCl $3$

$^1\text{H}$  NMR(400 MHz, Chloroform $d$ )

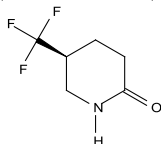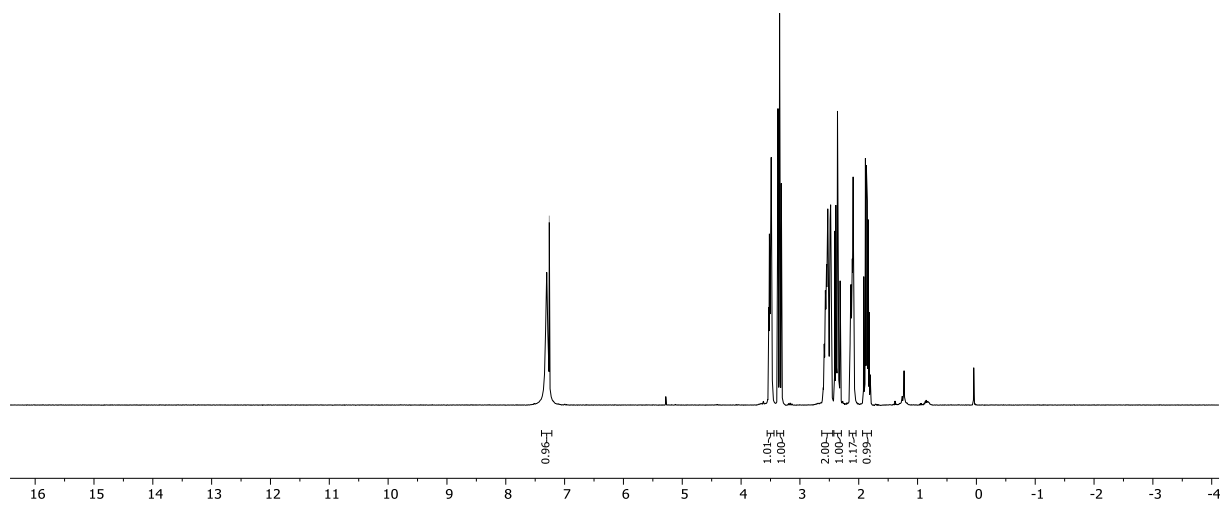

$^{13}\text{C}\{^1\text{H}\}$  NMR (101 MHz, Chloroform)

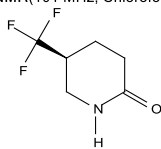

—77.16 CDCl<sub>3</sub>

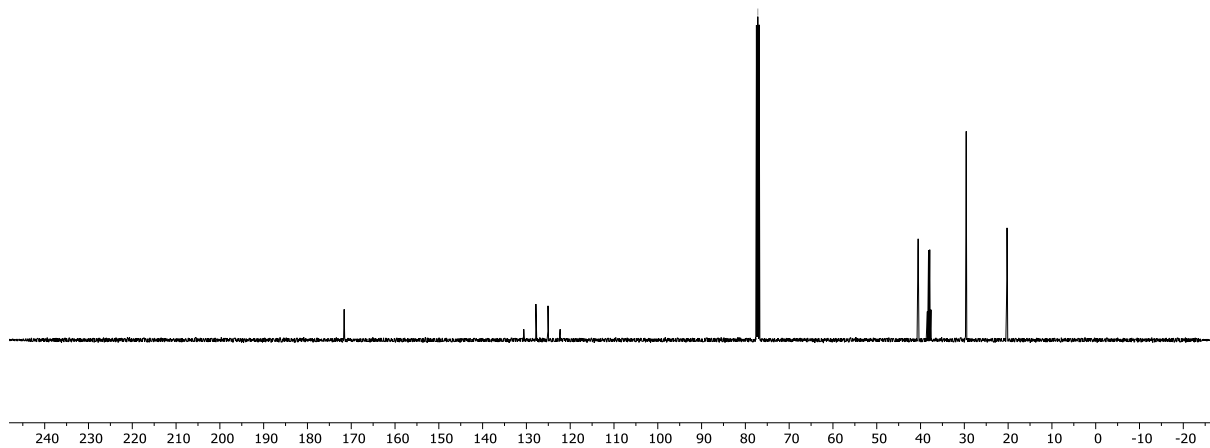

$^{19}\text{F}\{^1\text{H}\}$  NMR (376 MHz, Chloroform)

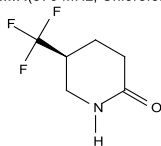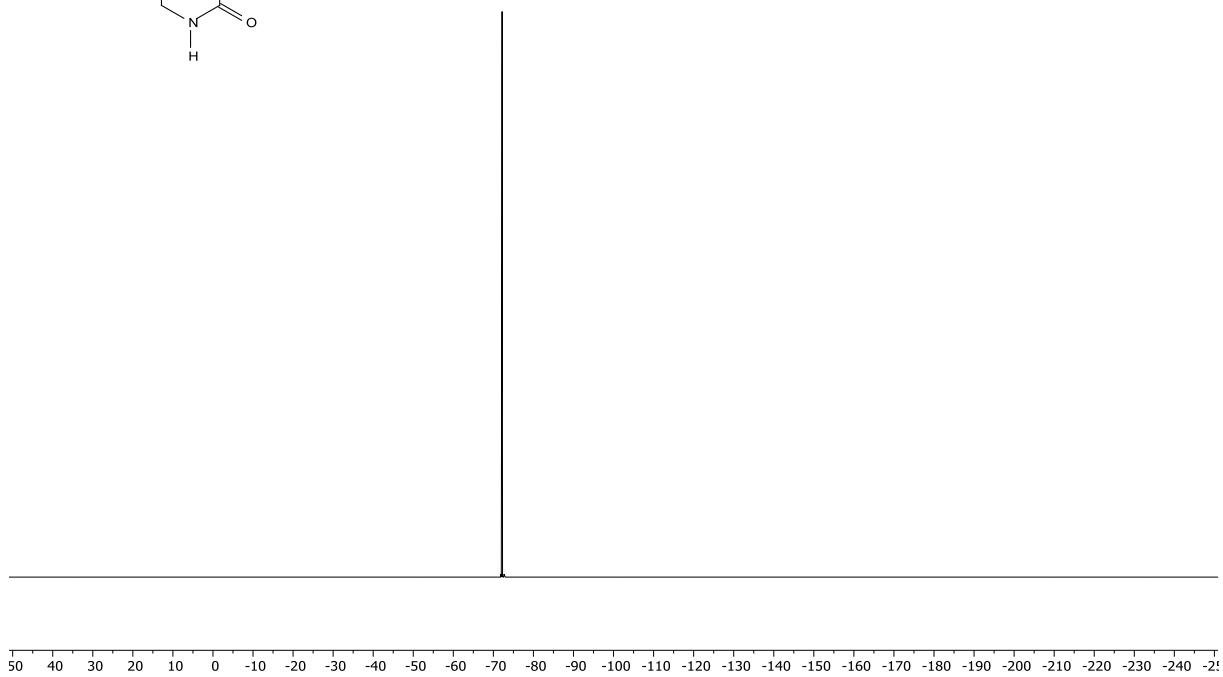

<sup>1</sup>H NMR(400 MHz, Chloroform)

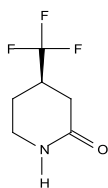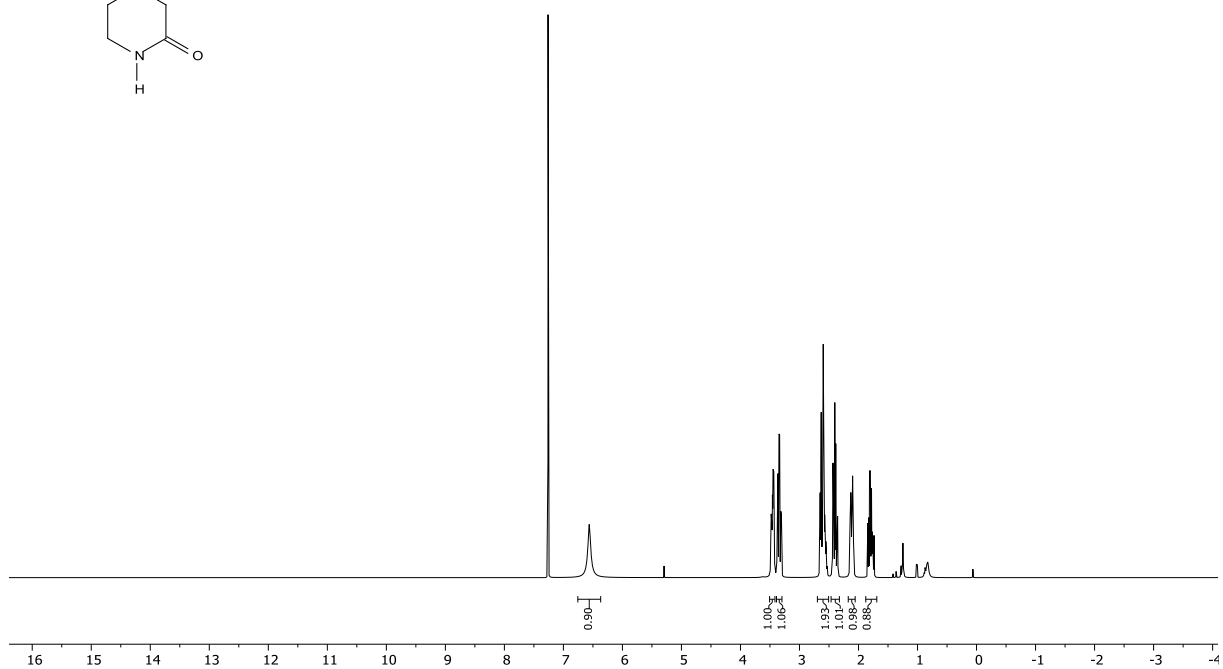

<sup>13</sup>C{<sup>1</sup>H} NMR(101 MHz, Chloroform)

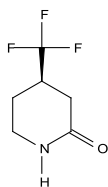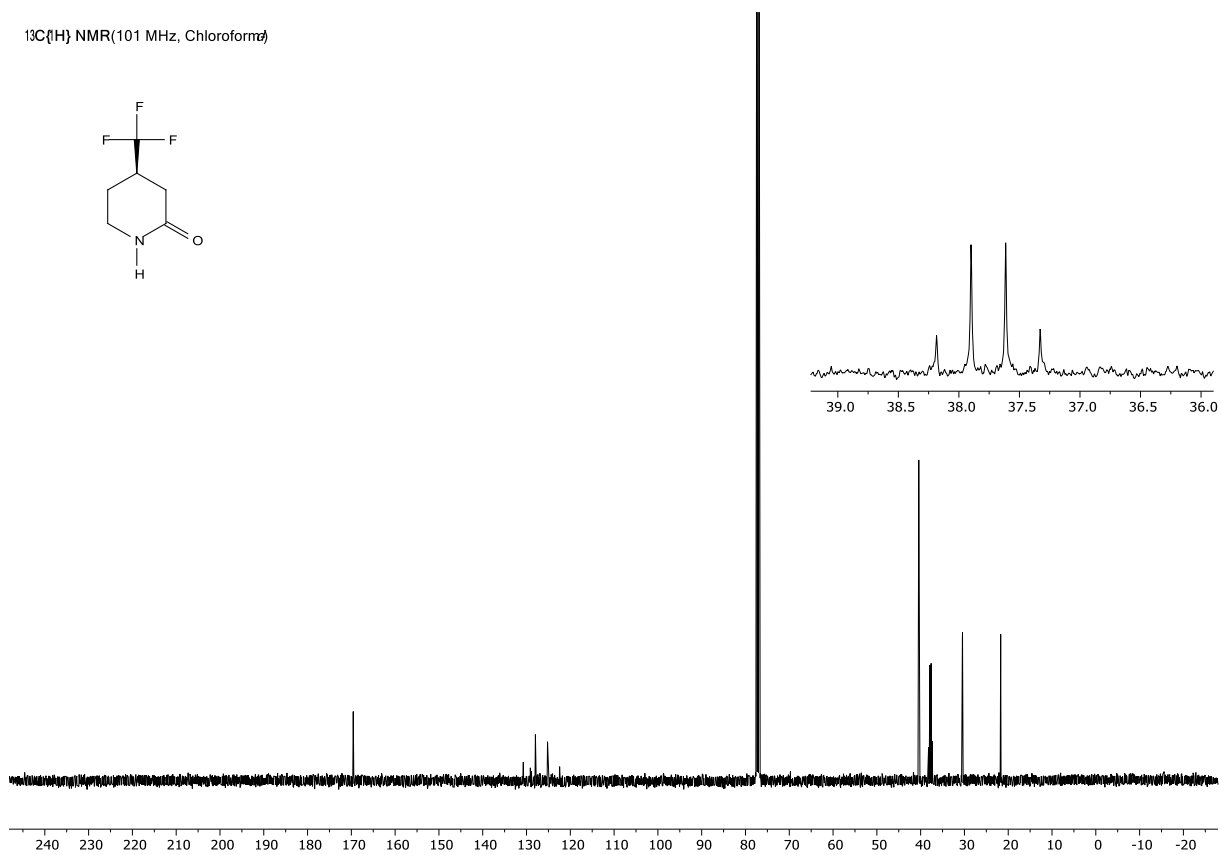

$^{19}\text{F}$  NMR(376 MHz, Chloroform)

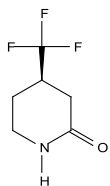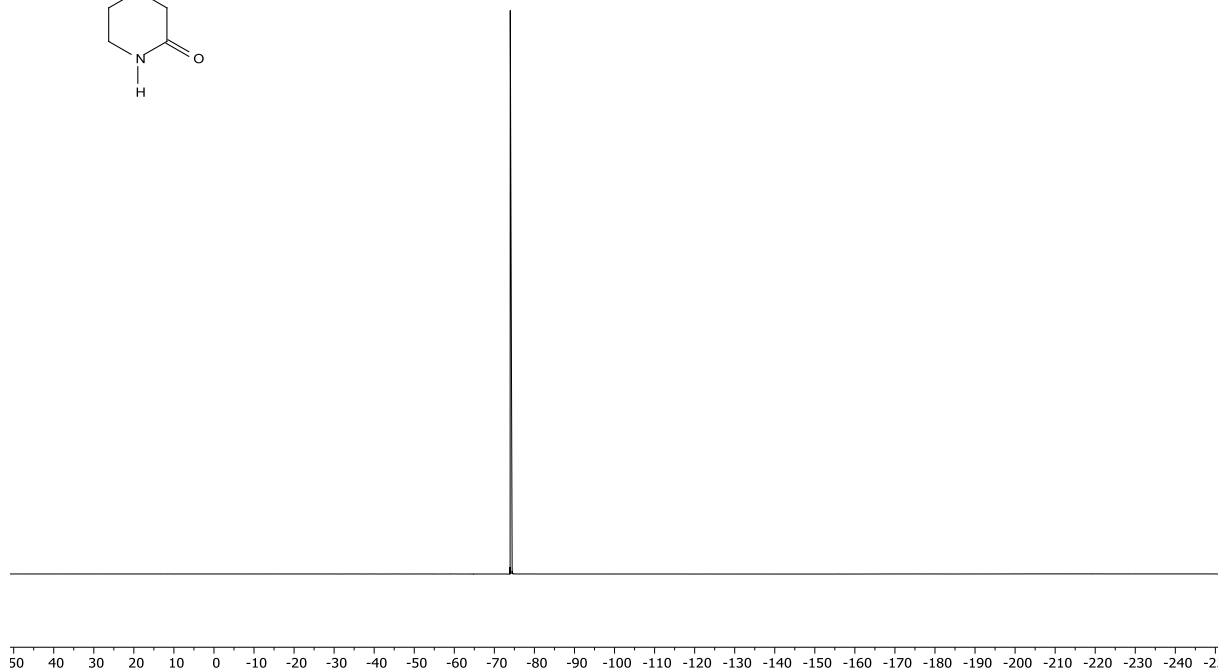

$^1\text{H}$  NMR(400 MHz, Chloroform)

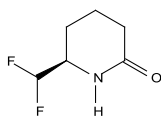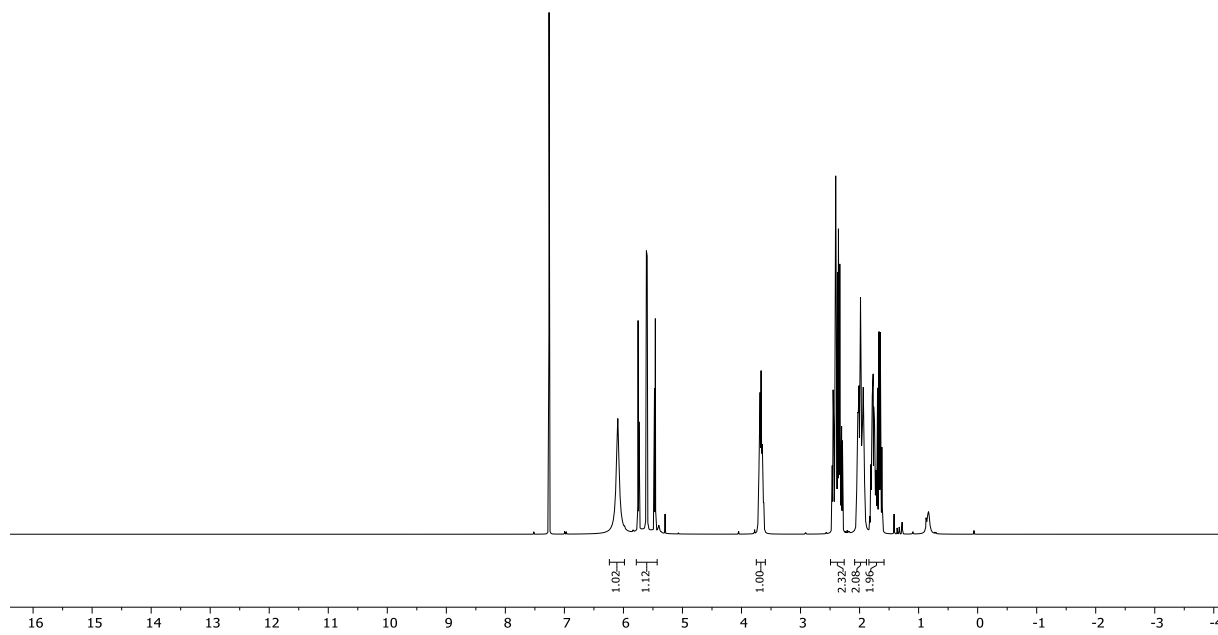

$^{13}\text{C}\{^1\text{H}\}$  NMR (101 MHz, Chloroform)

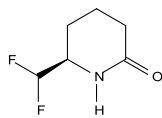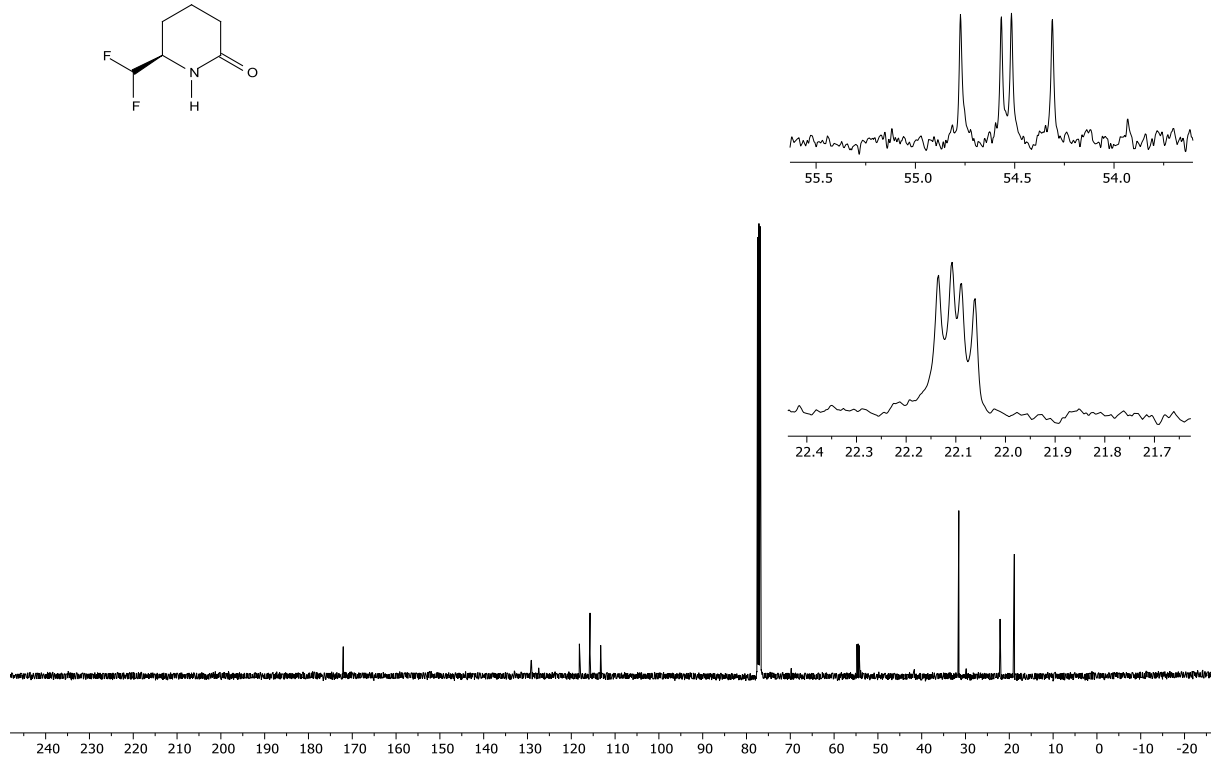

$^{19}\text{F}$  NMR (376 MHz, Chloroform)

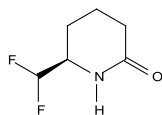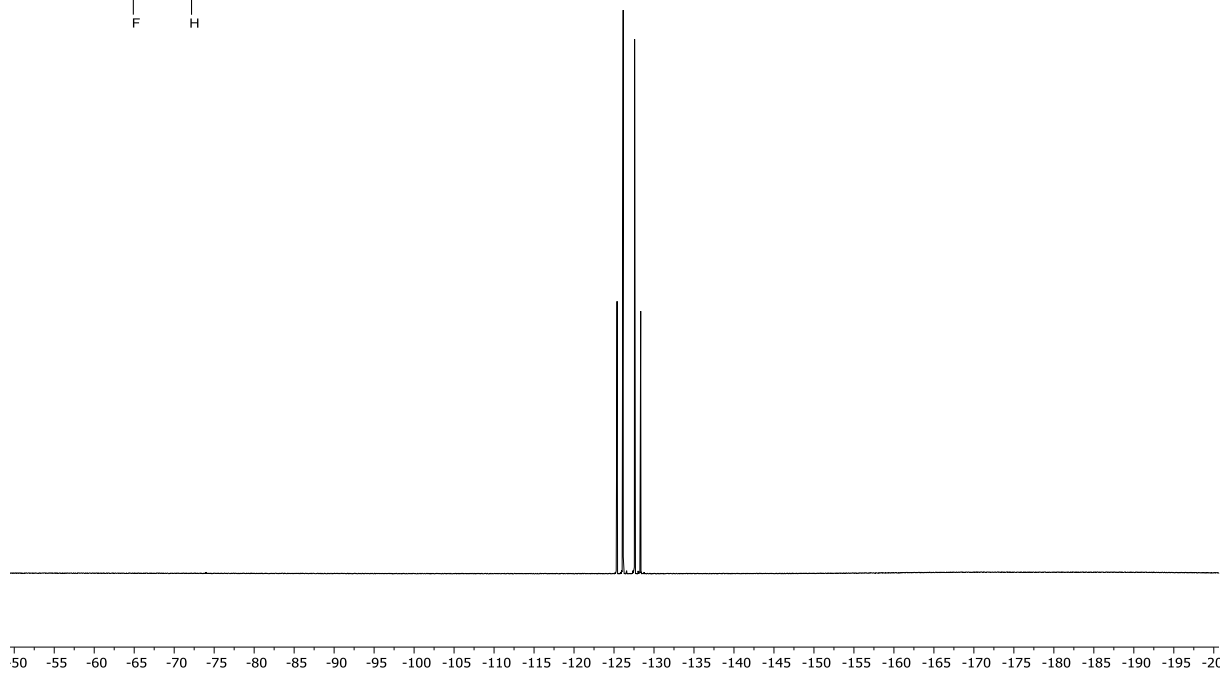

$^1\text{H}$  NMR(400 MHz, Chloroform)

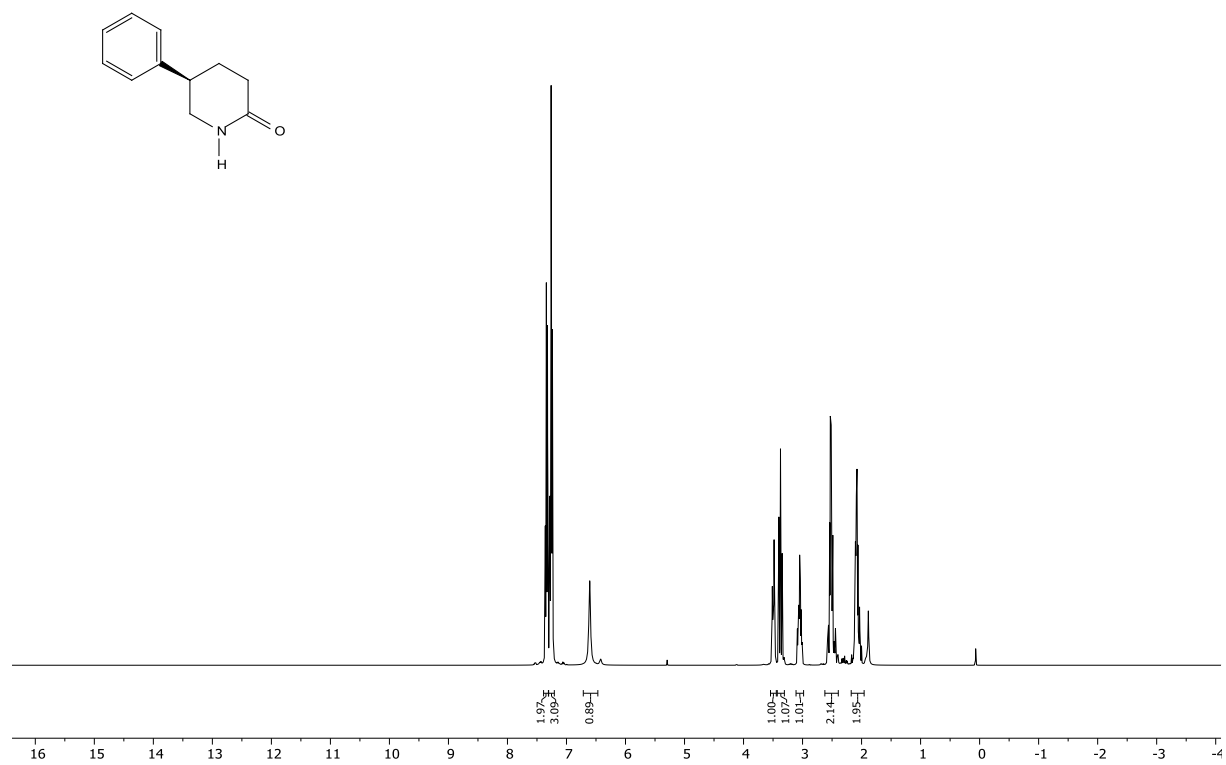

$^{13}\text{C}\{^1\text{H}\}$  NMR(101 MHz, Chloroform)

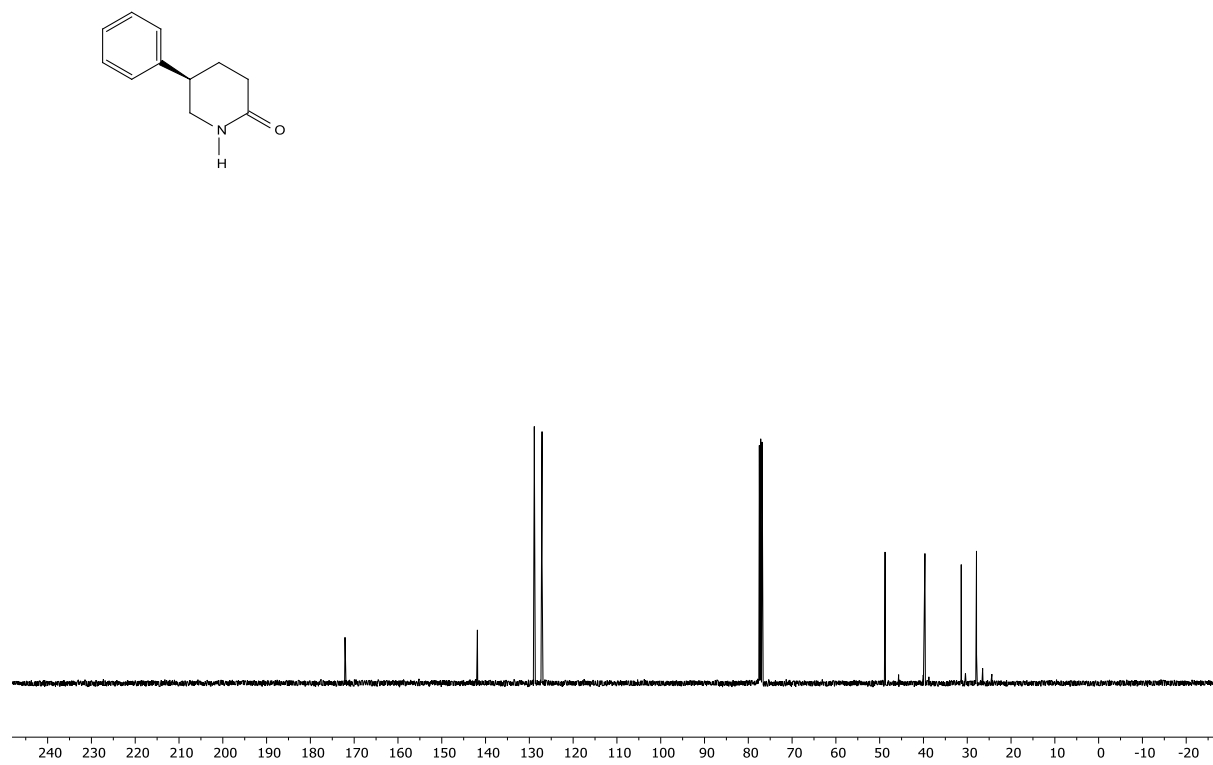

<sup>1</sup>H NMR(400 MHz, Chloroform)

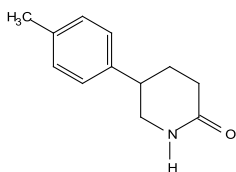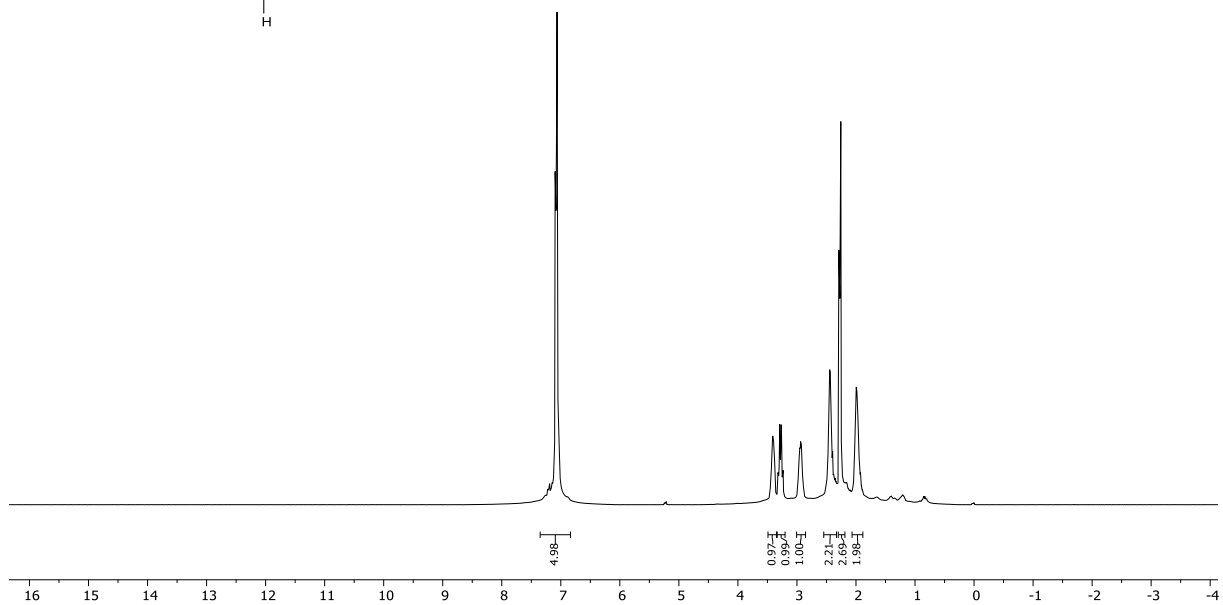

<sup>13</sup>C{<sup>1</sup>H} NMR(101 MHz, Chloroform)

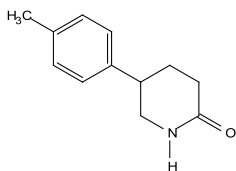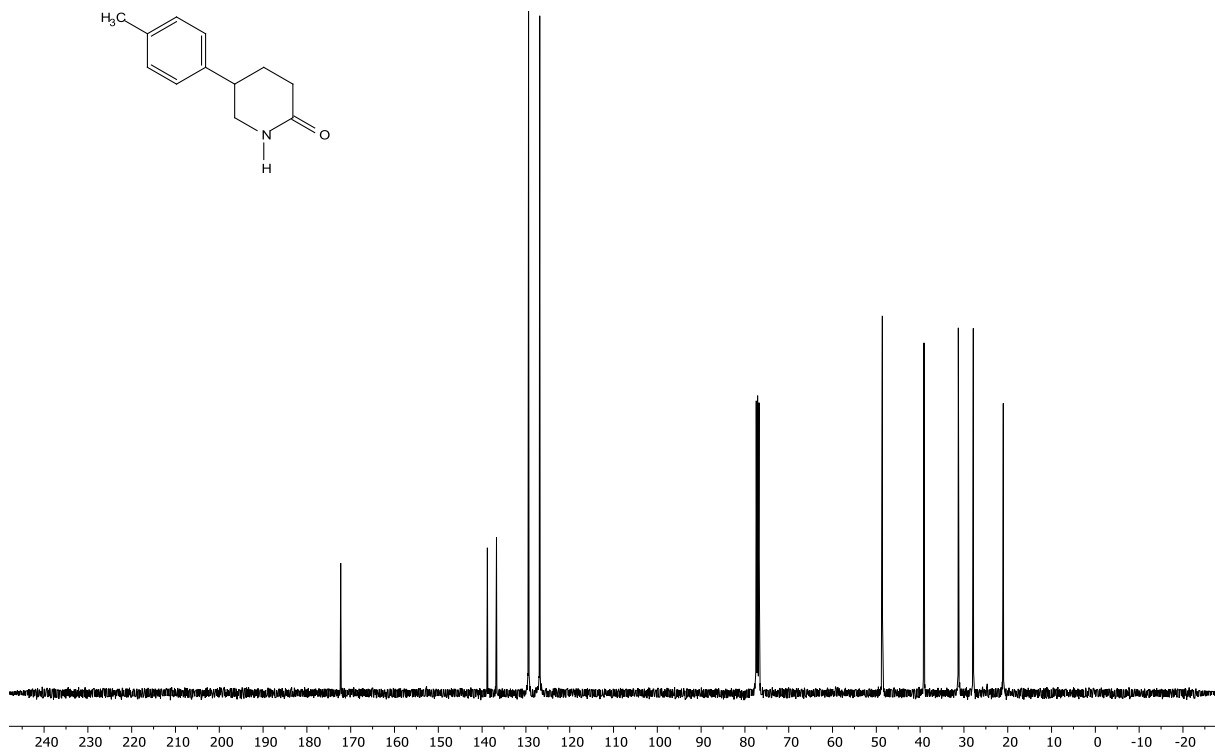

<sup>1</sup>H NMR(400 MHz, Chloroform-d)

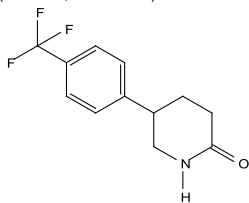

— 7.26 CDCl<sub>3</sub>

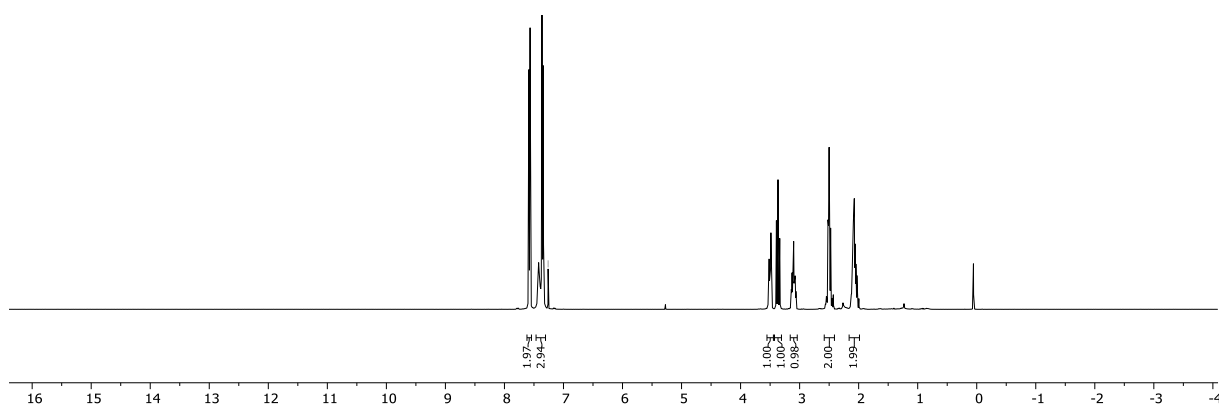

<sup>13</sup>C{<sup>1</sup>H} NMR(101 MHz, Chloroform-d)

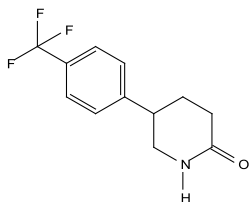

— 77.16 CDCl<sub>3</sub>

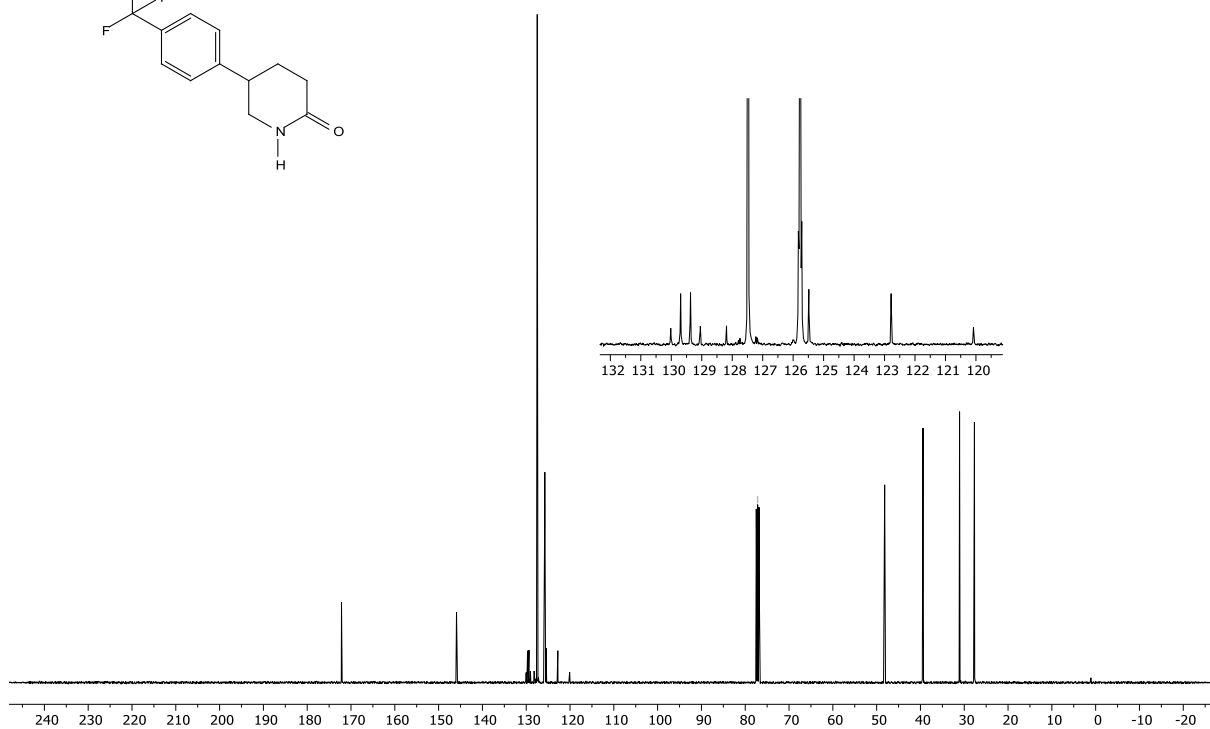



<sup>19</sup>F{<sup>1</sup>H} NMR(376 MHz, Chloroform<sub>d</sub>)

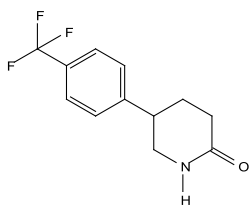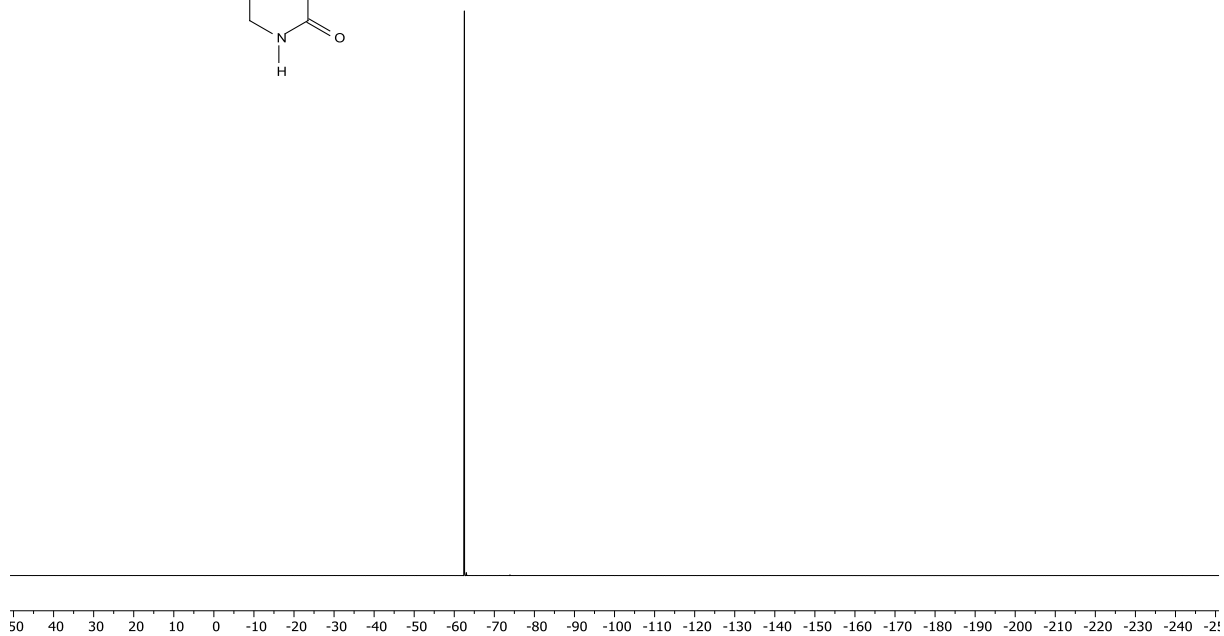

<sup>1</sup>H NMR(400 MHz, Chloroform<sub>d</sub>)

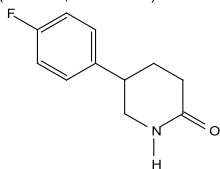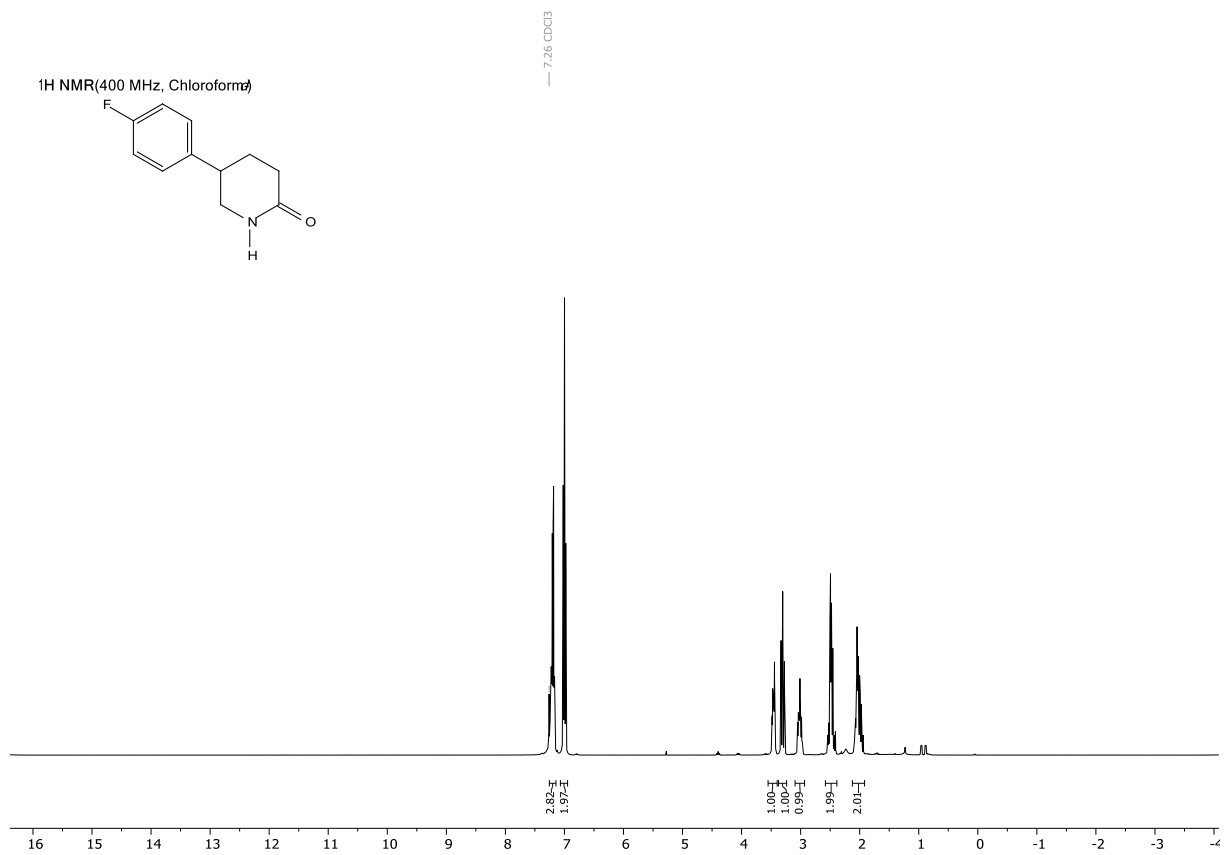

<sup>13</sup>C{<sup>1</sup>H} NMR(101 MHz, Chloroform)

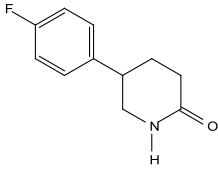

—77.16 CDCl<sub>3</sub>

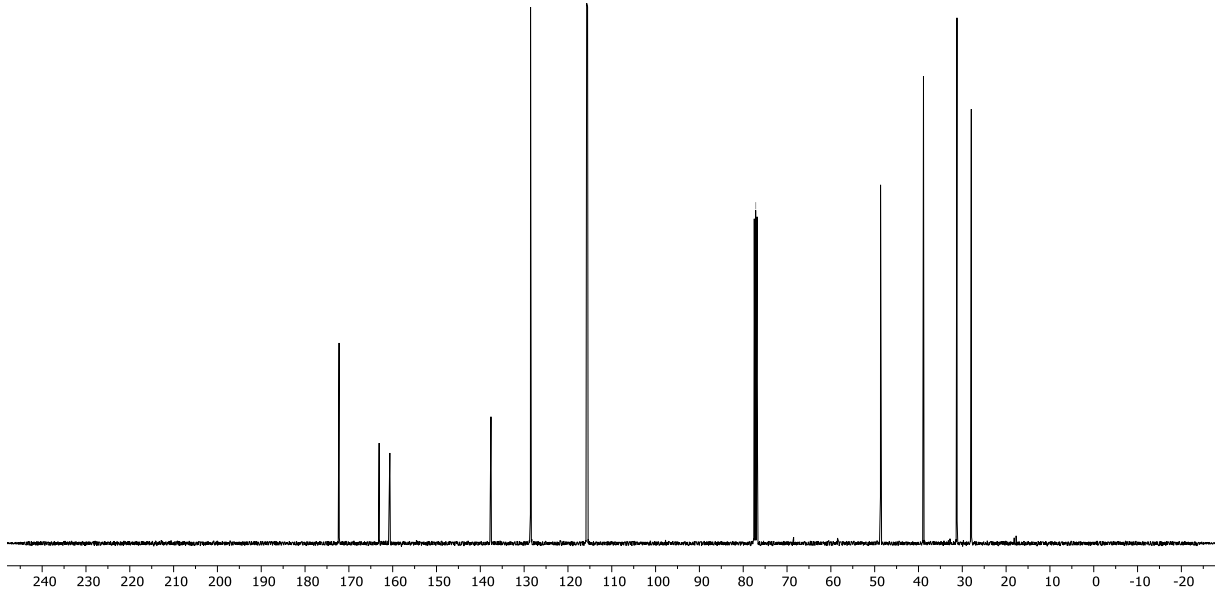

<sup>19</sup>F{<sup>1</sup>H} NMR(376 MHz, Chloroform)

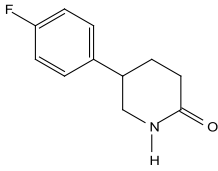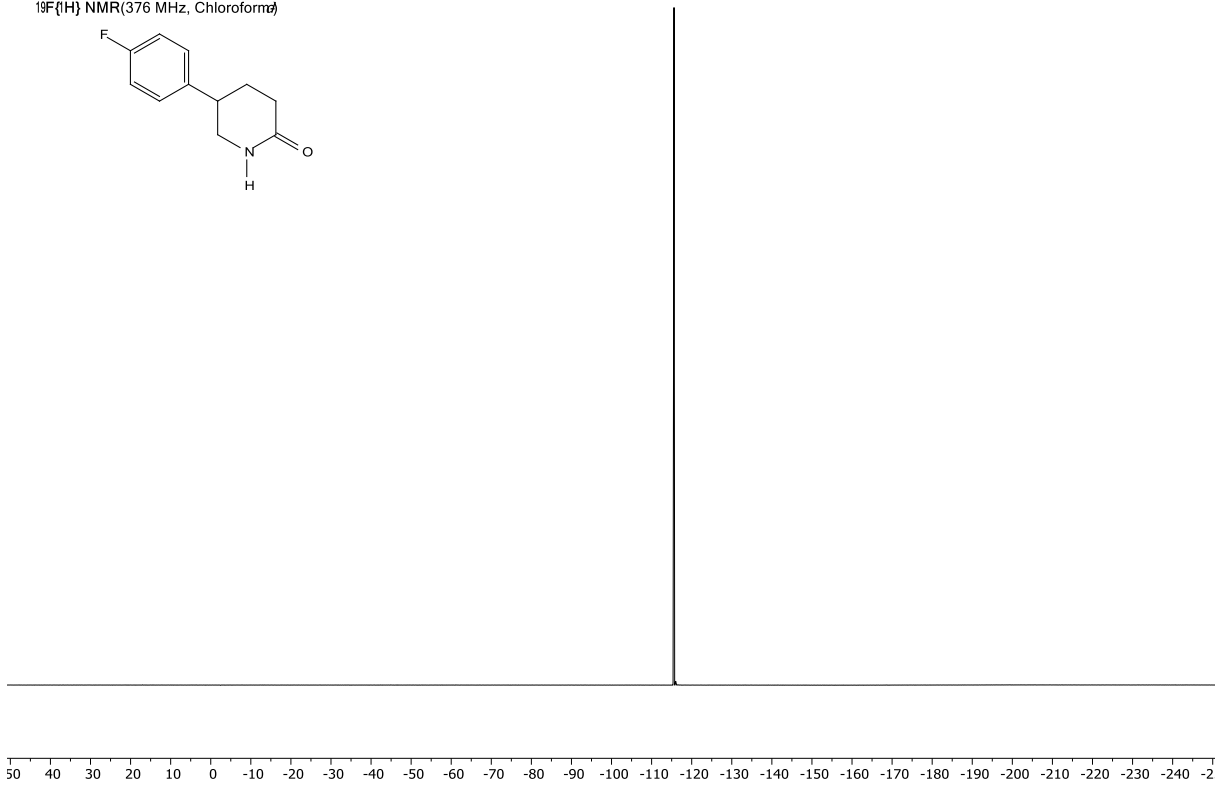

$^1\text{H}$  NMR(400 MHz, Chloroform $d_3$ )

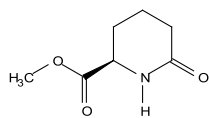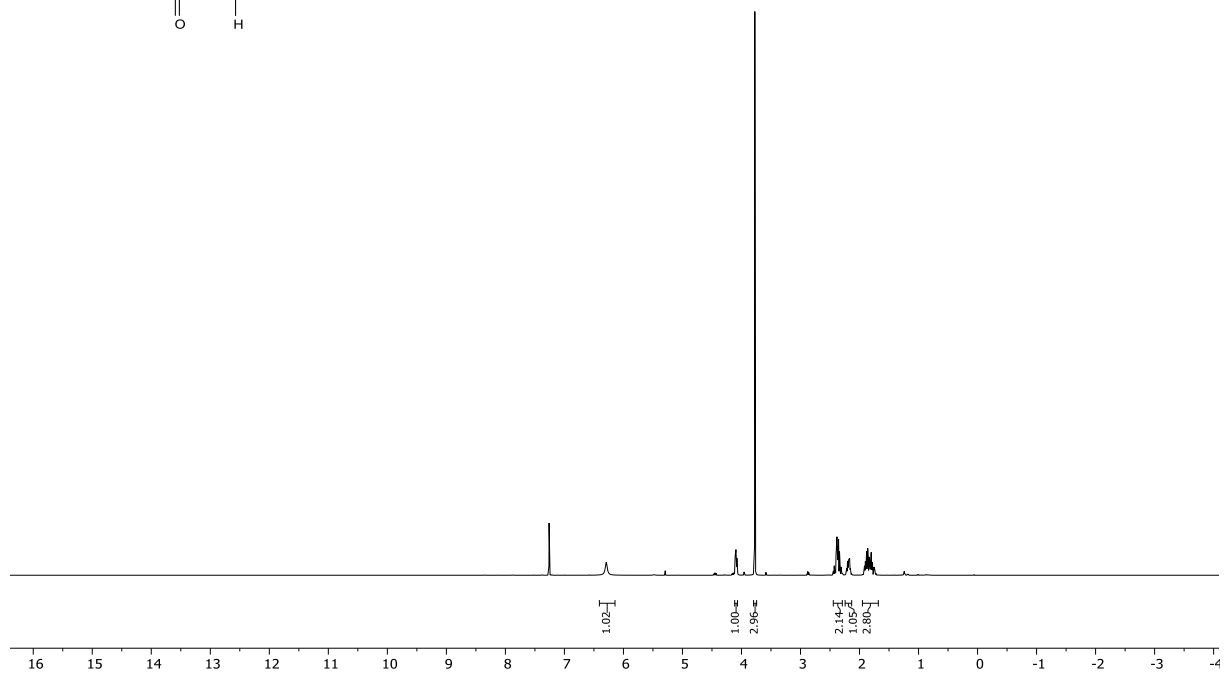

$^{13}\text{C}\{^1\text{H}\}$  NMR(101 MHz, Chloroform $d_3$ )

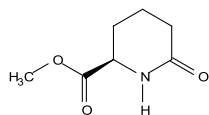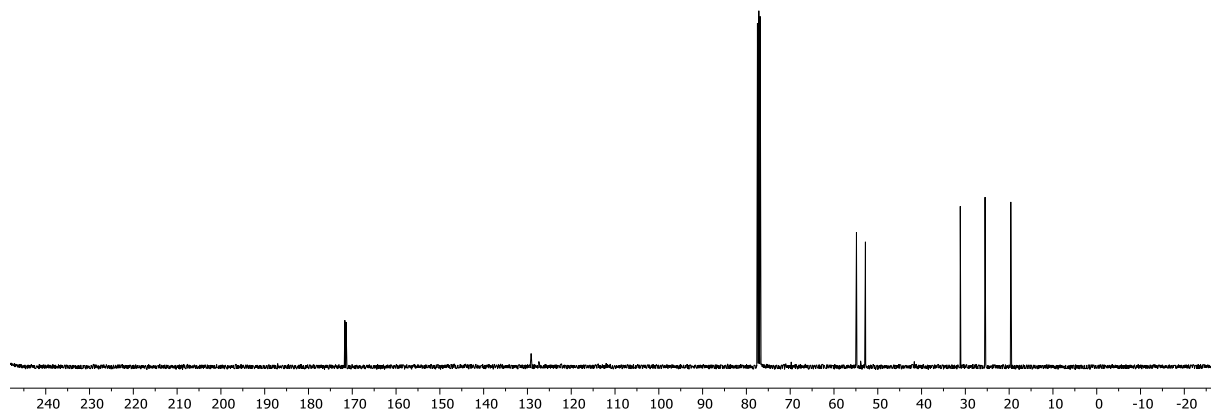

<sup>1</sup>H NMR(400 MHz, Chloroform)

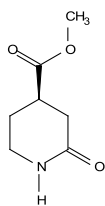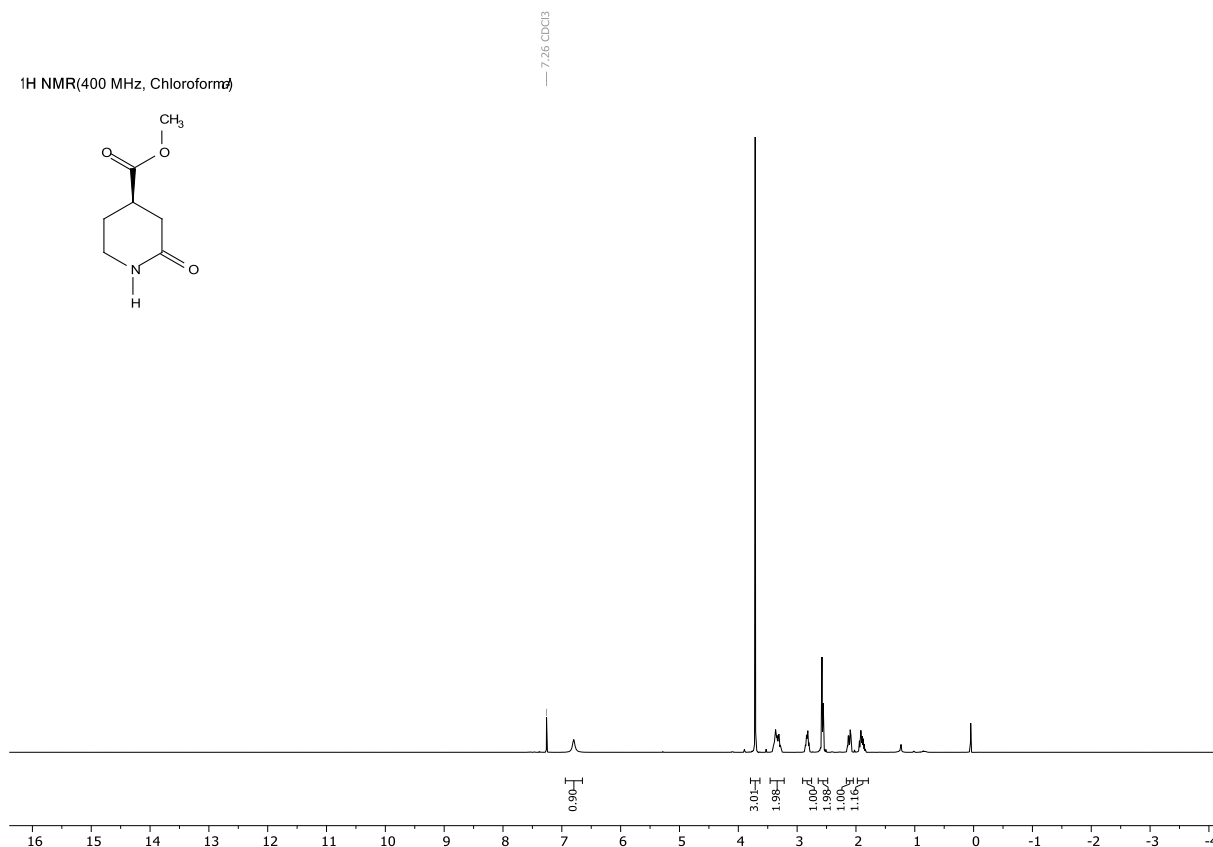

<sup>13</sup>C{<sup>1</sup>H} NMR(101 MHz, Chloroform)

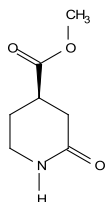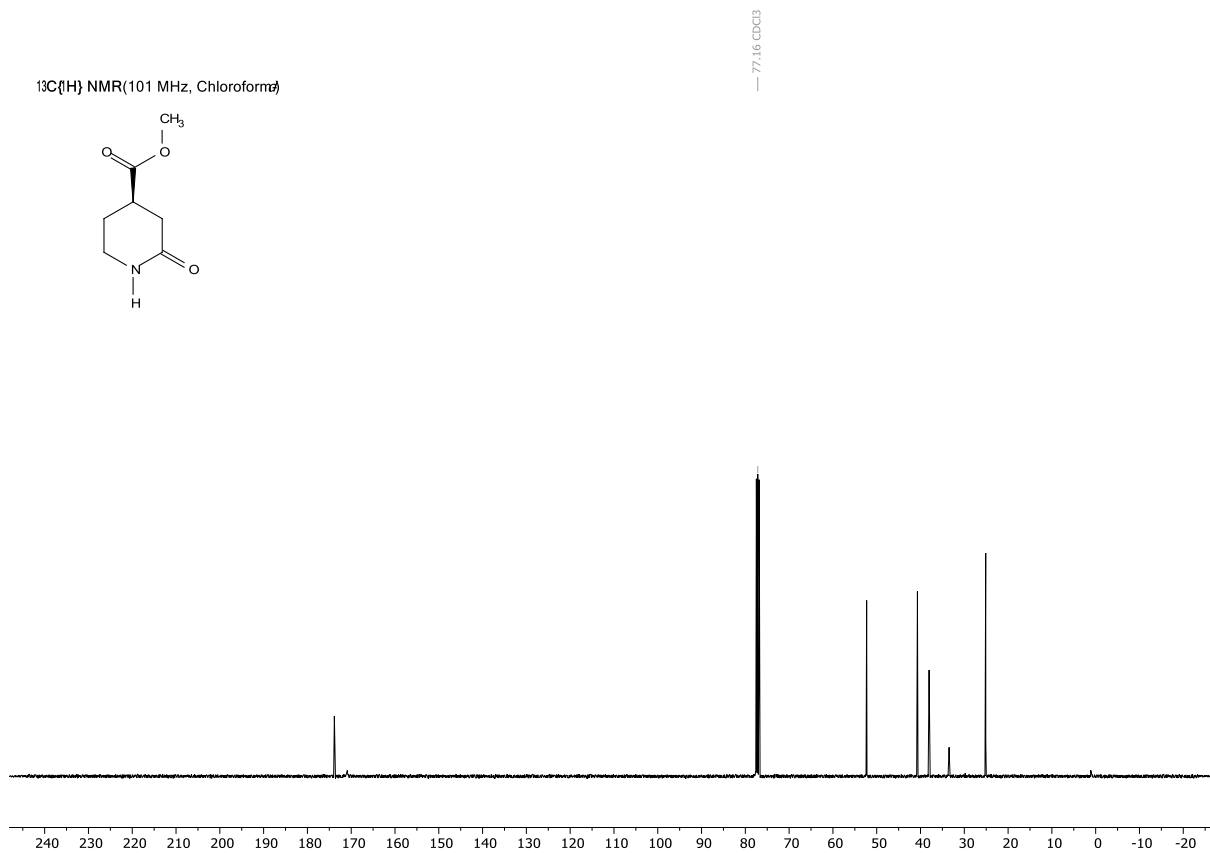

<sup>1</sup>H NMR(400 MHz, Chloroform)

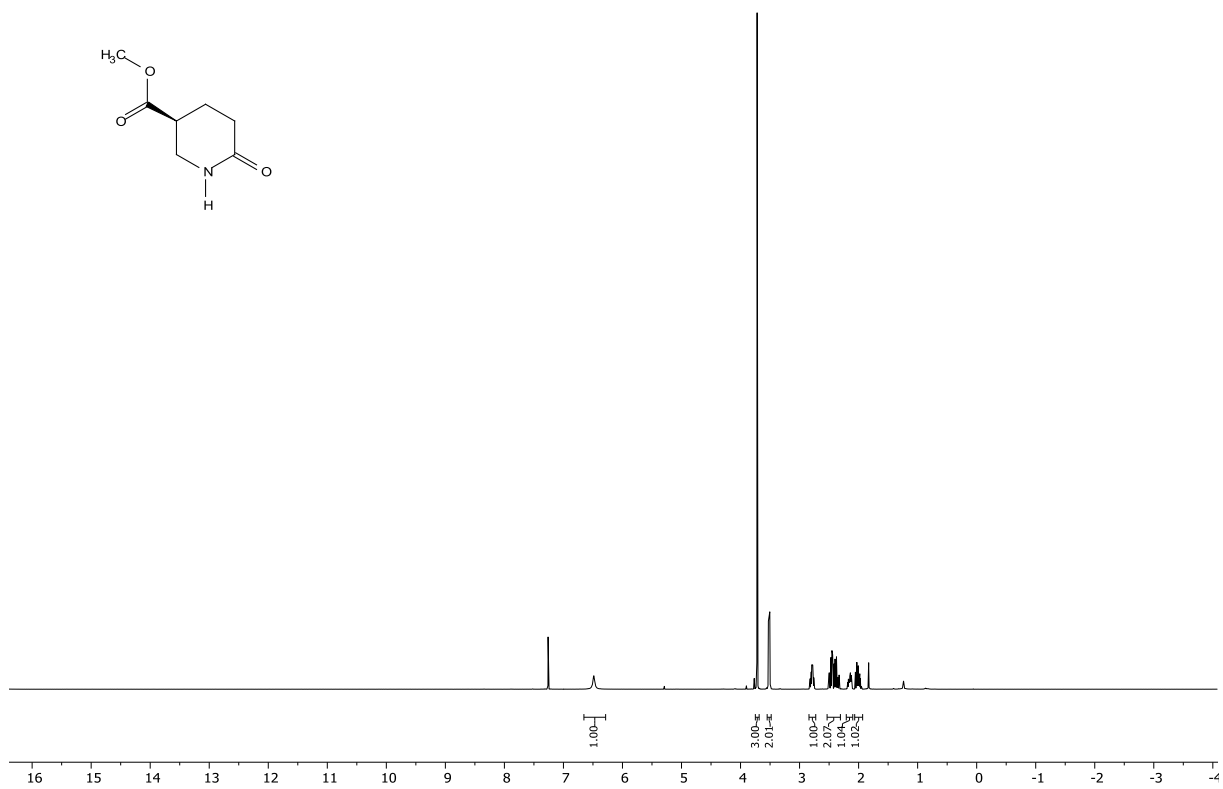

<sup>13</sup>C{<sup>1</sup>H} NMR(101 MHz, Chloroform)

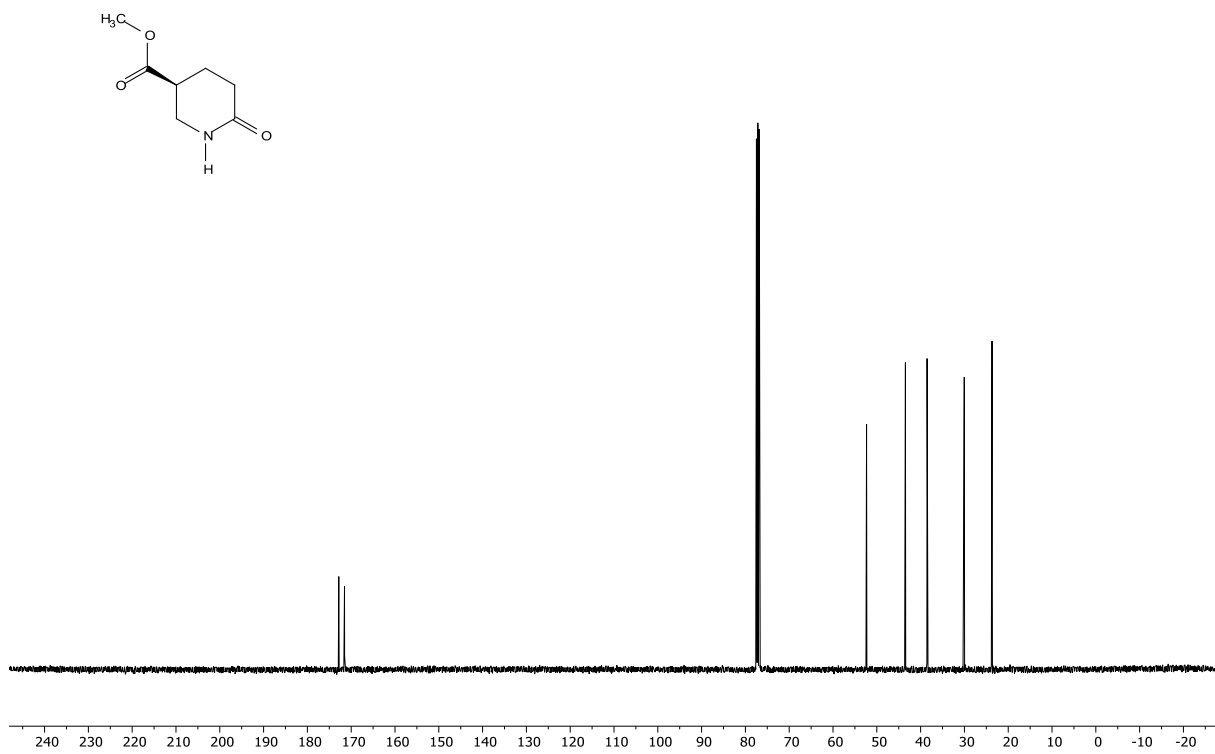

<sup>1</sup>H NMR(400 MHz, Methanol-d<sub>4</sub>)

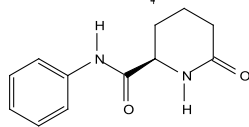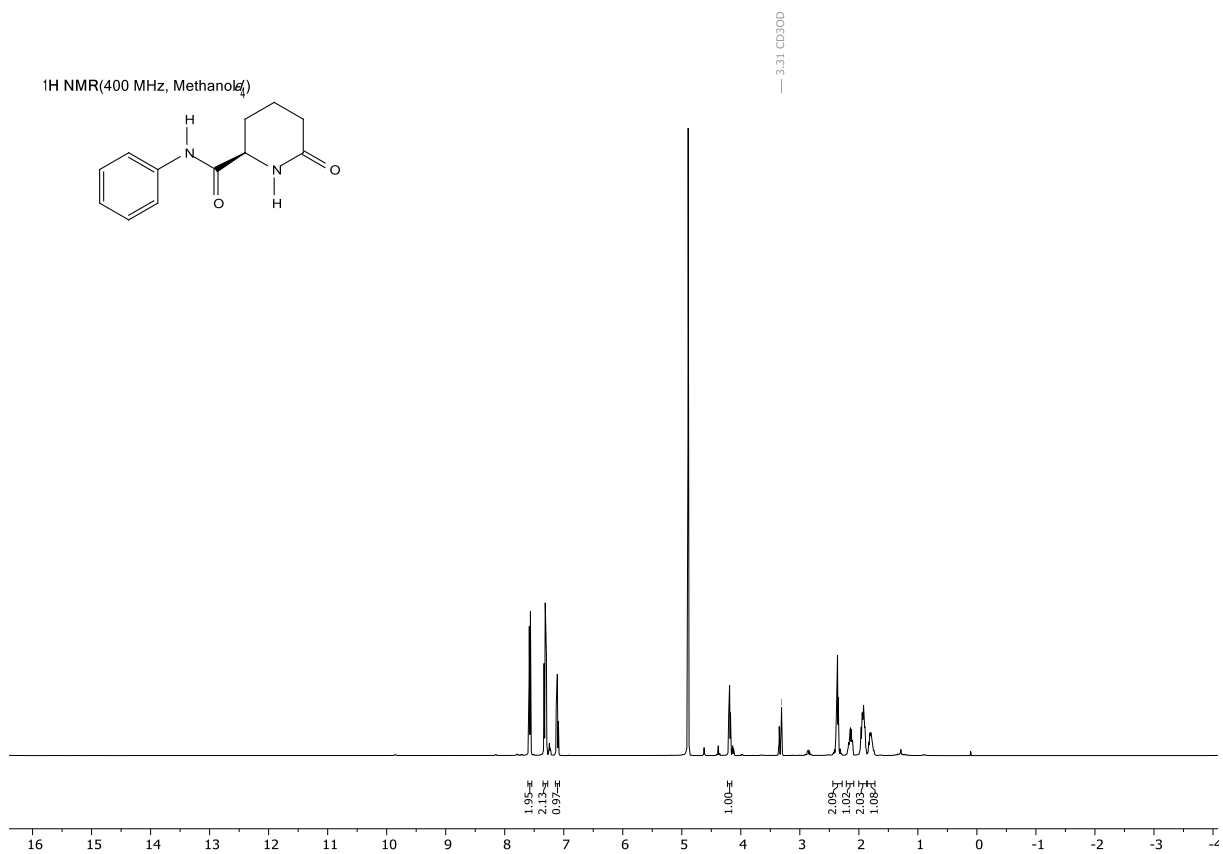

<sup>13</sup>C{<sup>1</sup>H} NMR(101 MHz, Methanol-d<sub>4</sub>)

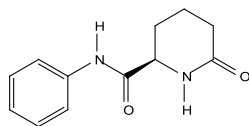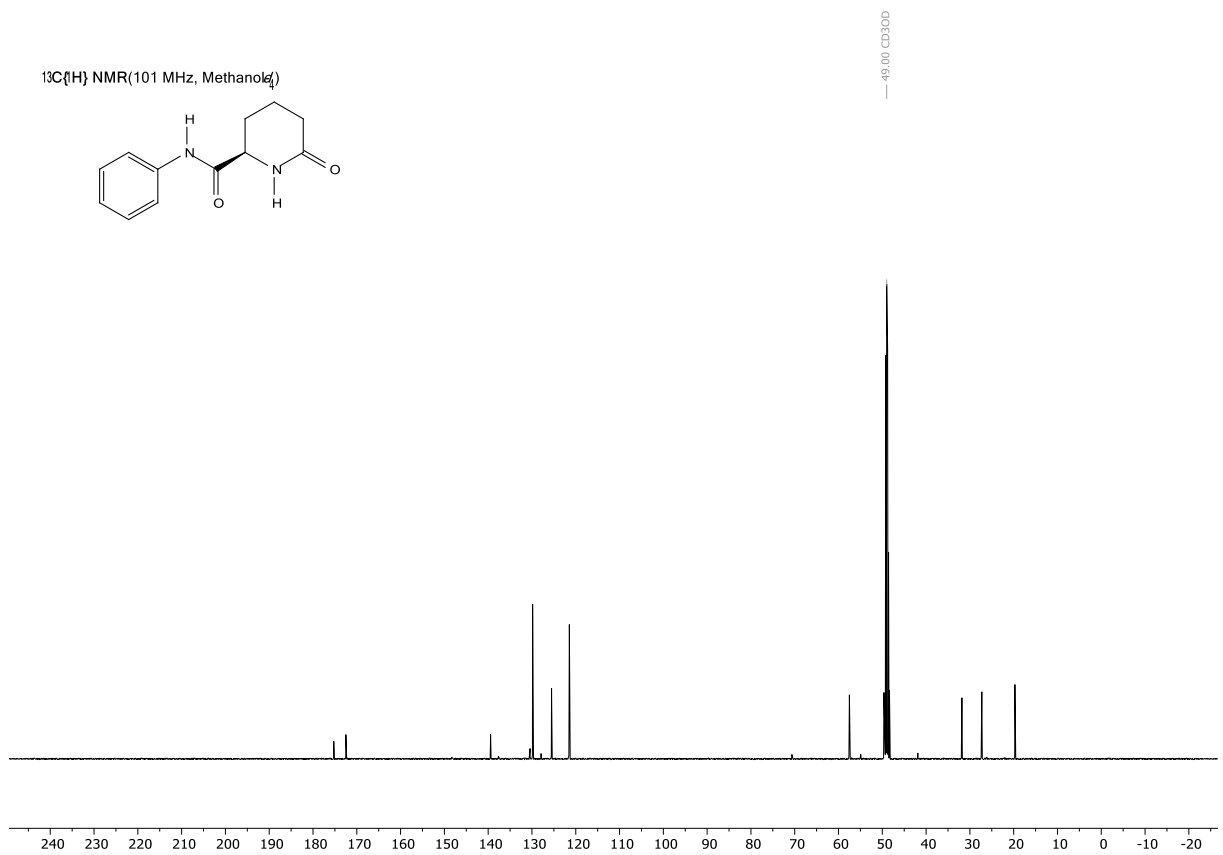

<sup>1</sup>H NMR(400 MHz, Methanol-d<sub>4</sub>)

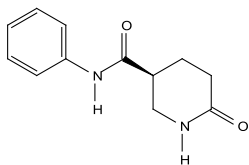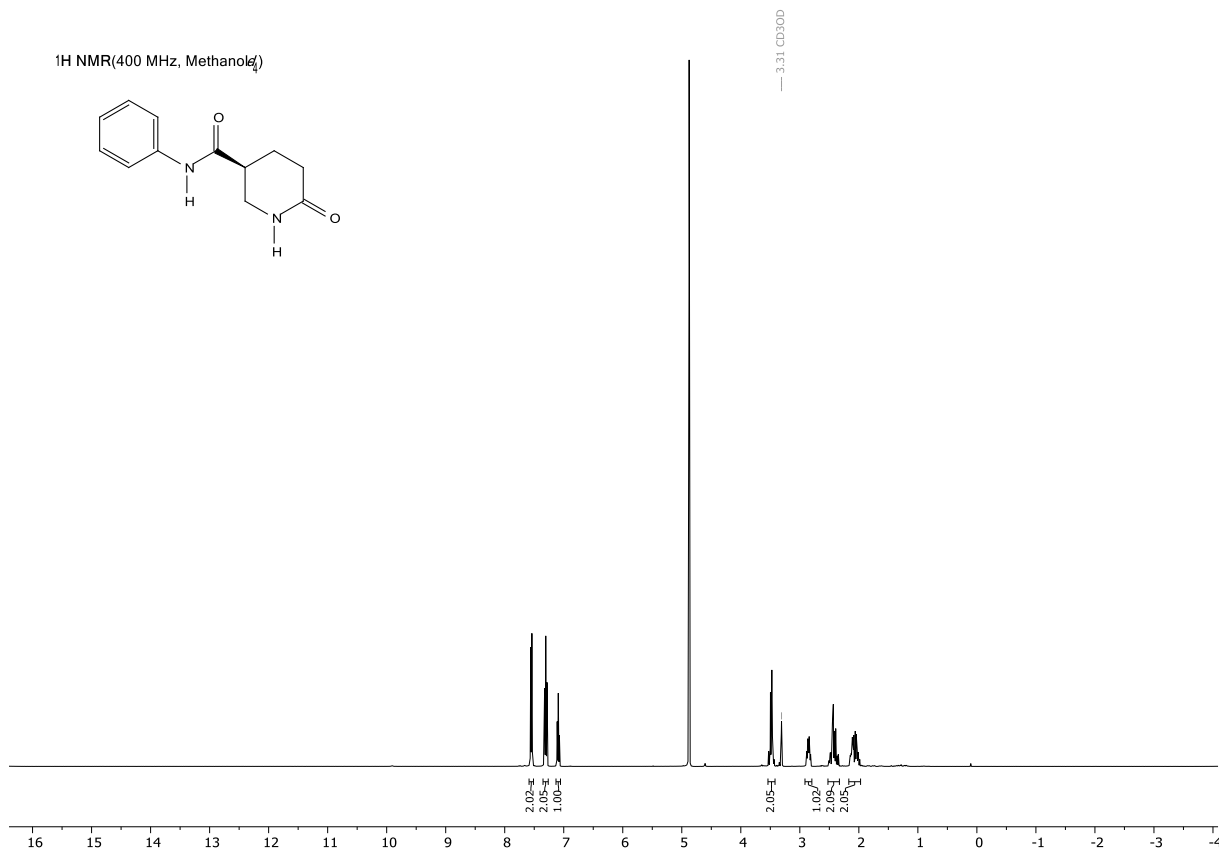

<sup>13</sup>C{<sup>1</sup>H} NMR(101 MHz, Methanol-d<sub>4</sub>)

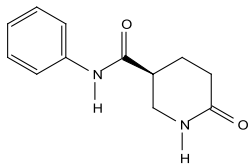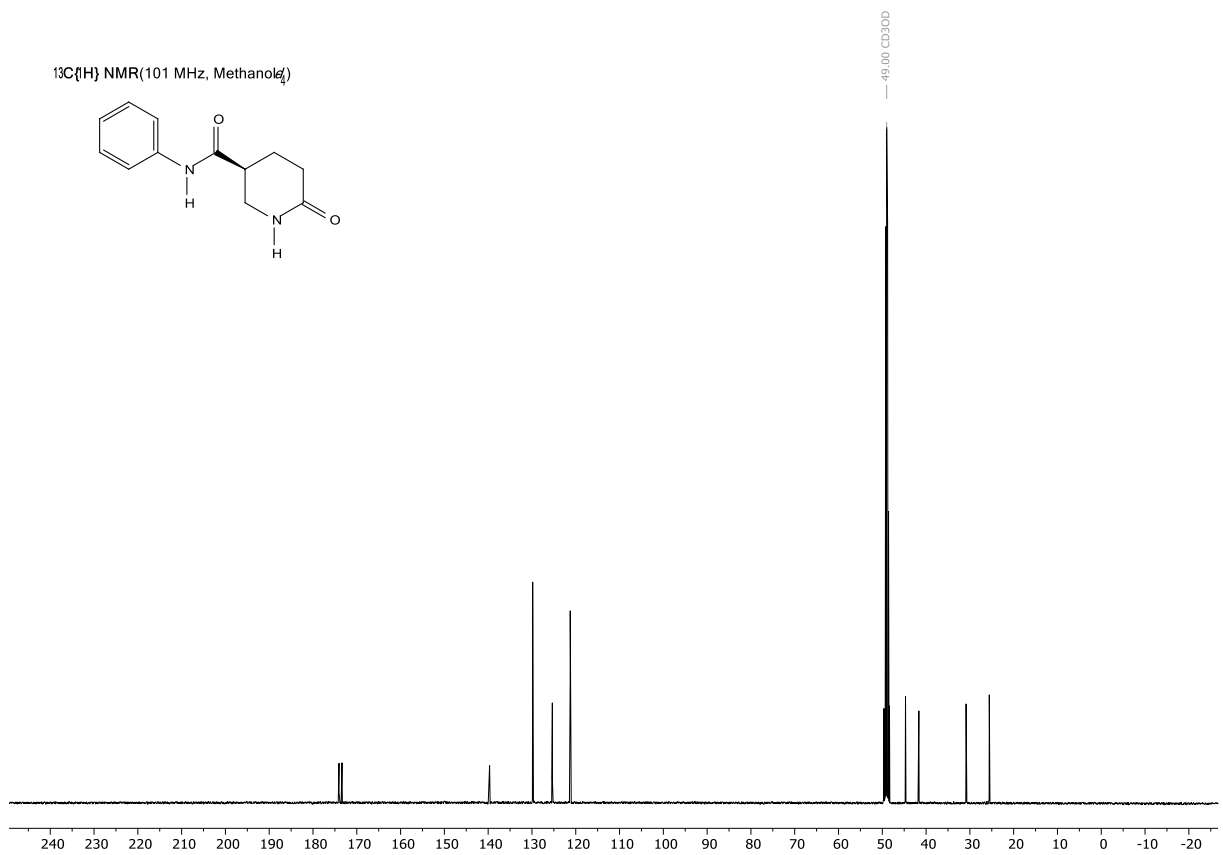

<sup>1</sup>H NMR(400 MHz, Chloroform)

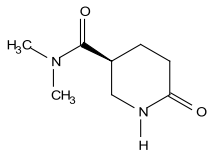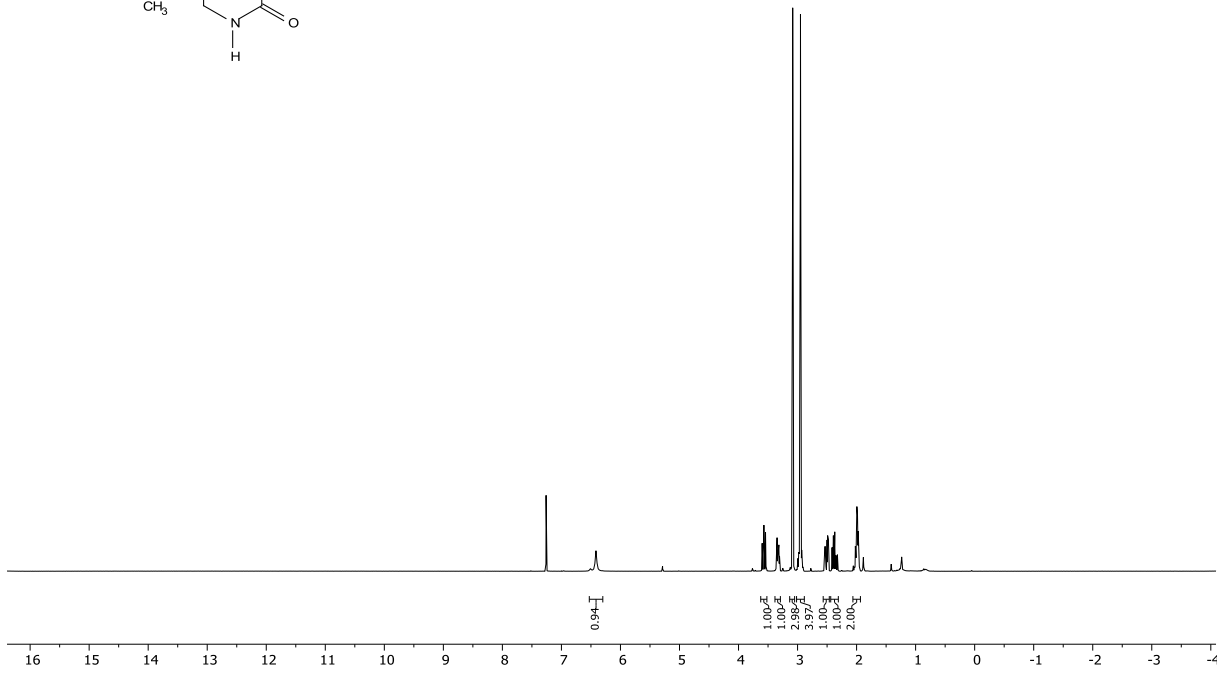

<sup>13</sup>C{<sup>1</sup>H} NMR(101 MHz, Chloroform)

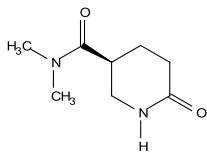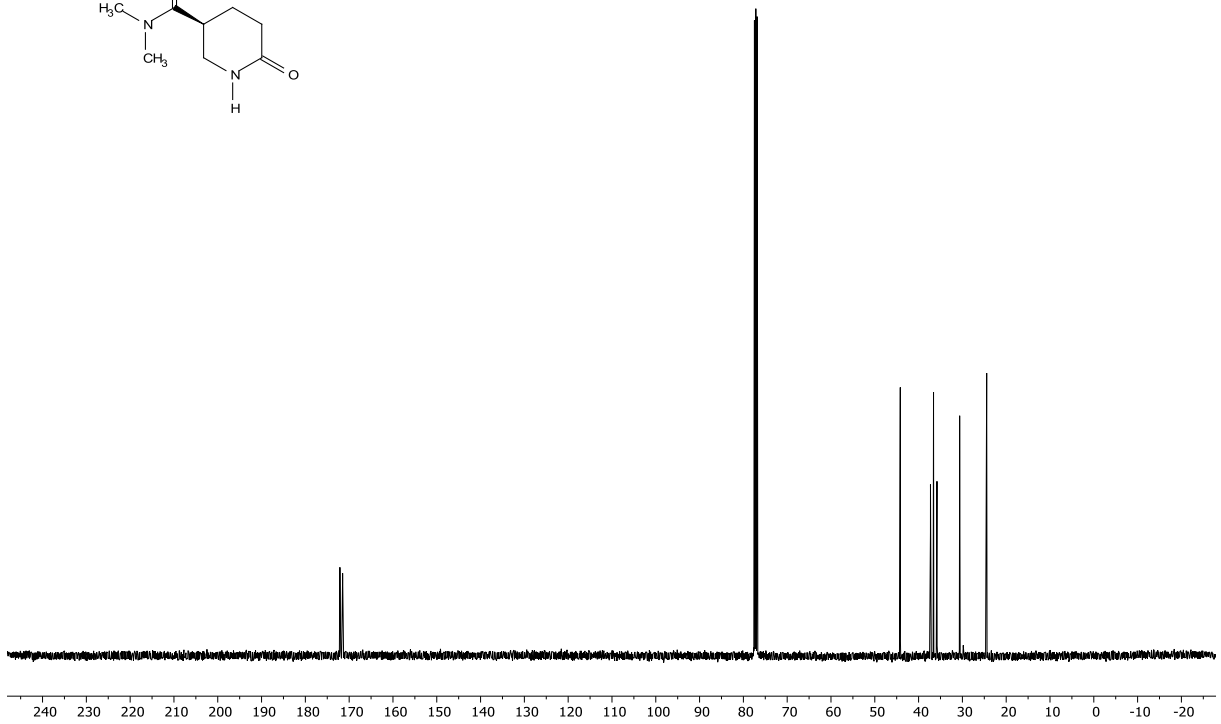



<sup>1</sup>H NMR(400 MHz, Chloroform-d)

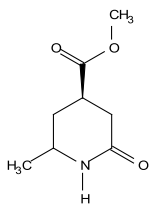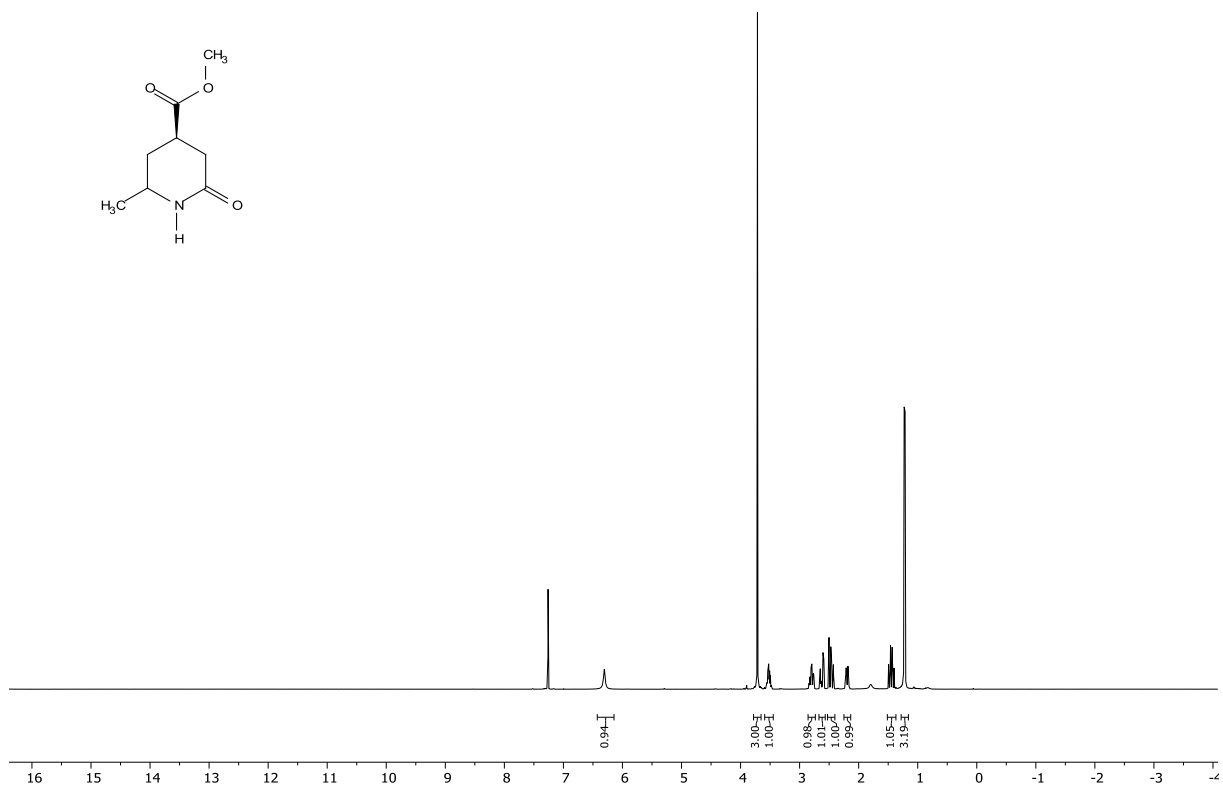

<sup>13</sup>C{<sup>1</sup>H} NMR(101 MHz, Chloroform-d)

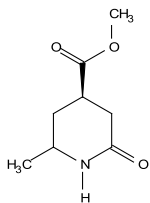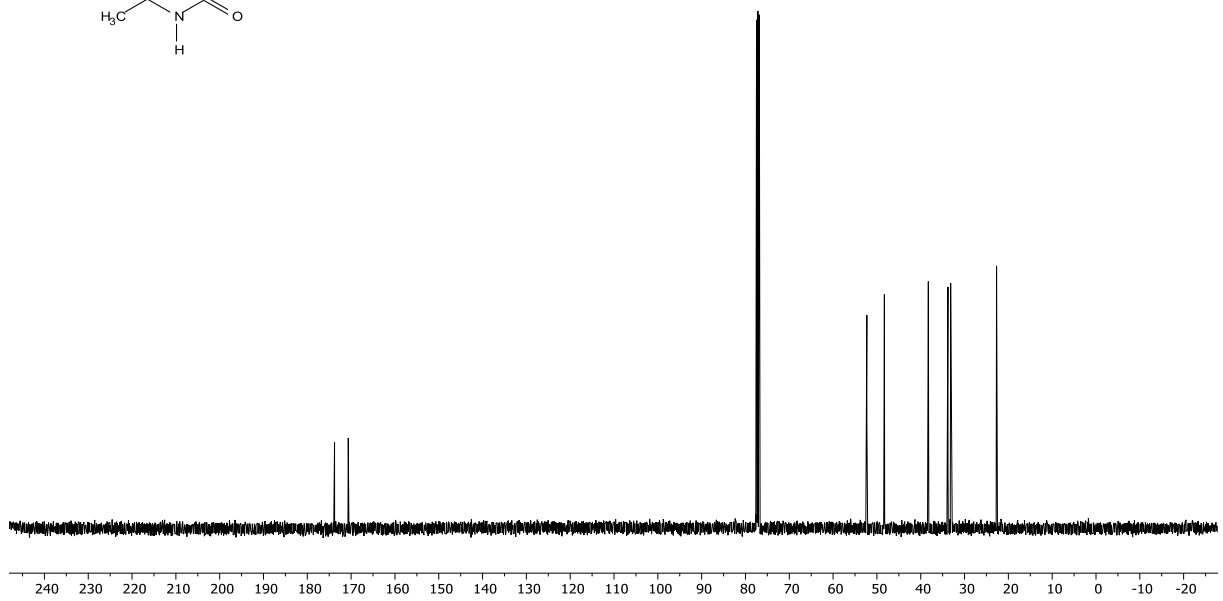

$^1\text{H}$  NMR(400 MHz, Chloroform- $d_3$ )

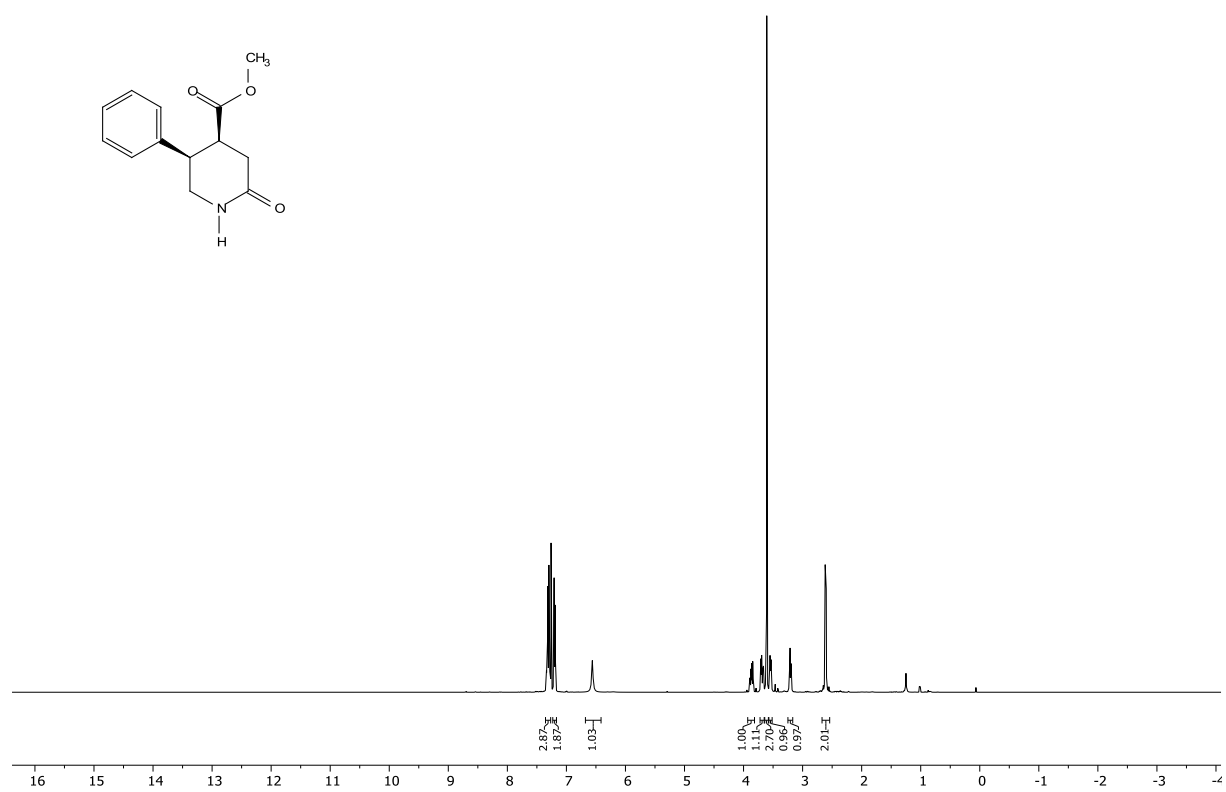

$^{13}\text{C}\{^1\text{H}\}$  NMR(101 MHz, Chloroform- $d_3$ )

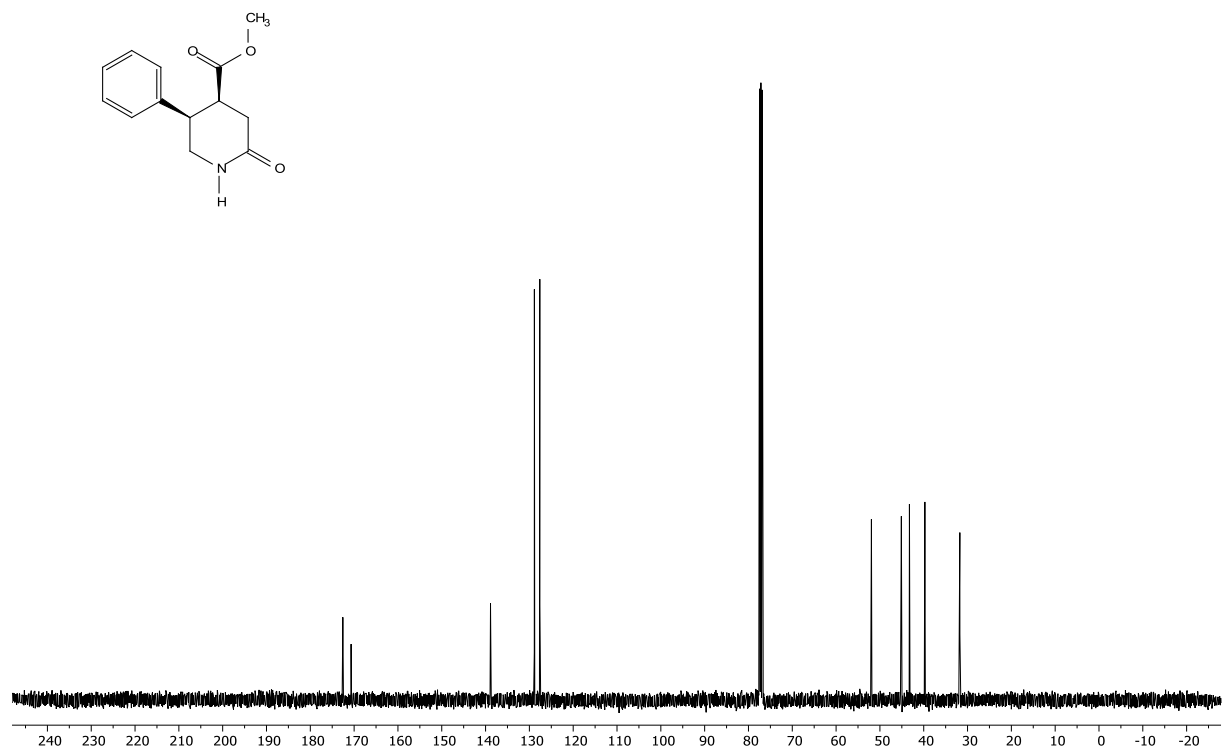

<sup>1</sup>H NMR(500 MHz, Chloroform)

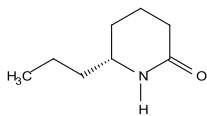

— 7.26 CDCl<sub>3</sub>

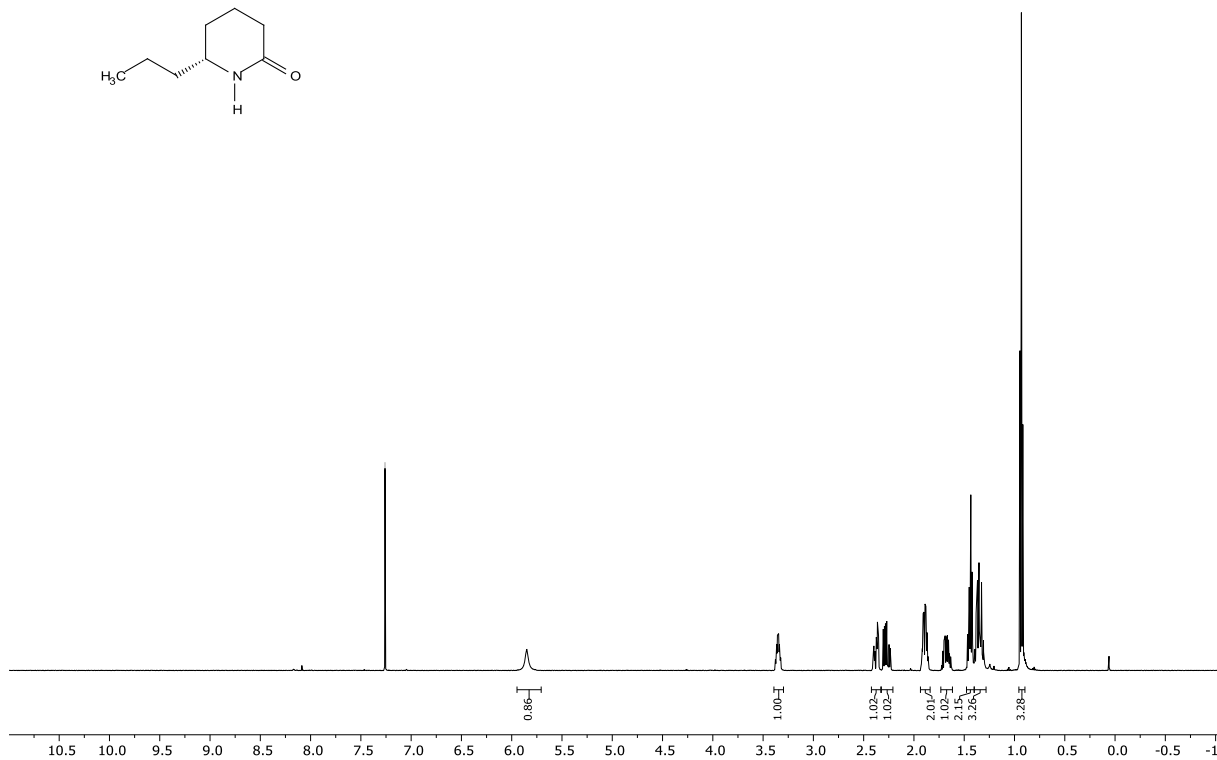

<sup>13</sup>C{<sup>1</sup>H} NMR(126 MHz, Chloroform)

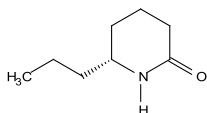

— 77.16 CDCl<sub>3</sub>

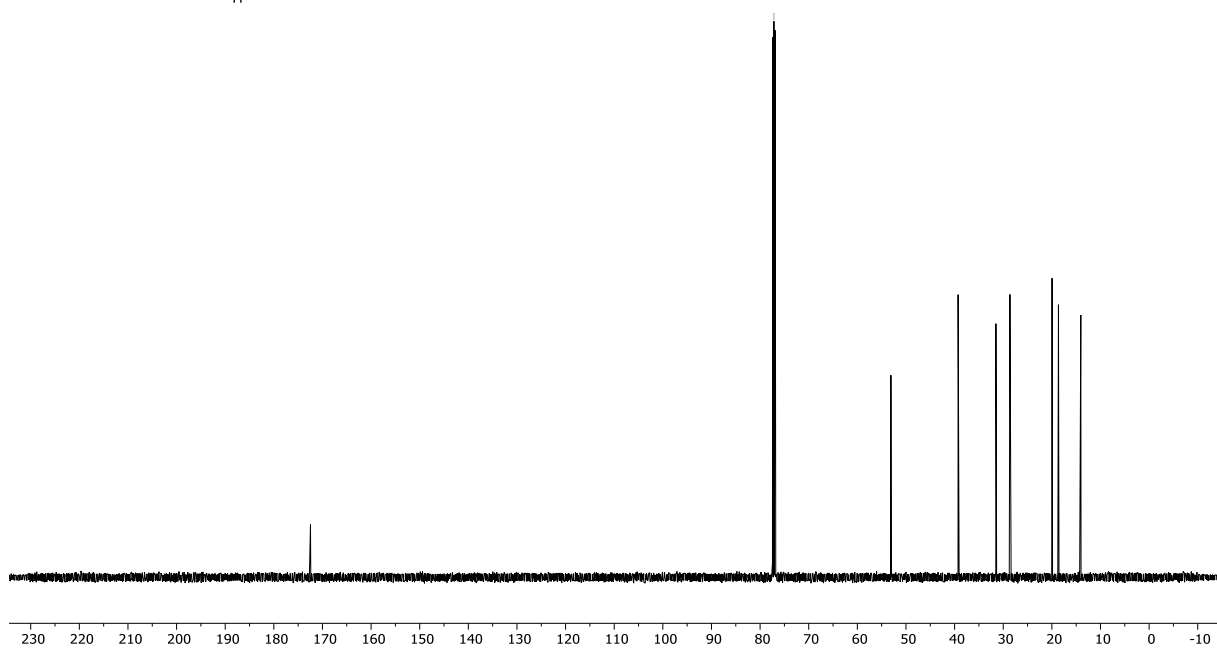

<sup>1</sup>H NMR(400 MHz, Chloroform)

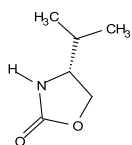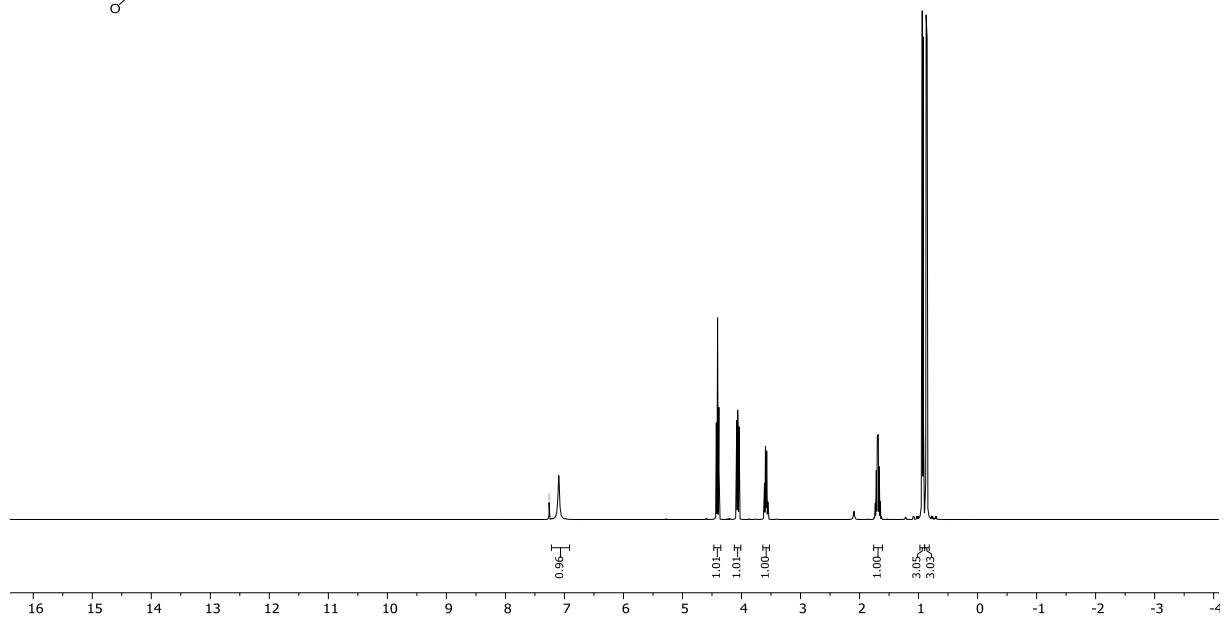

<sup>13</sup>C{<sup>1</sup>H} NMR(101 MHz, Chloroform)

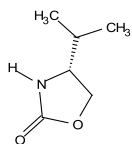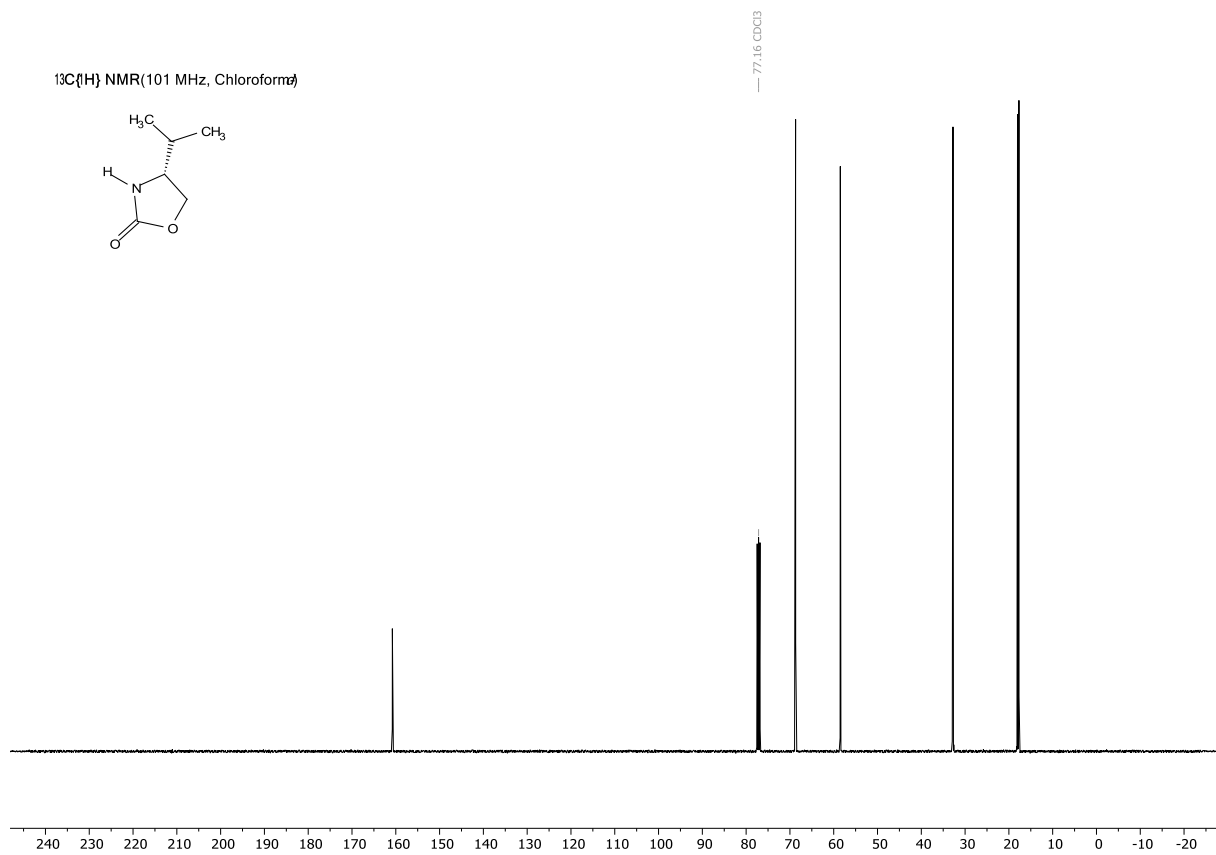

<sup>1</sup>H NMR(400 MHz, DMSO-d<sub>6</sub>)

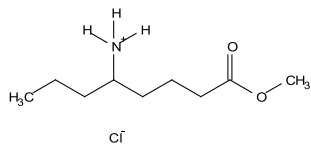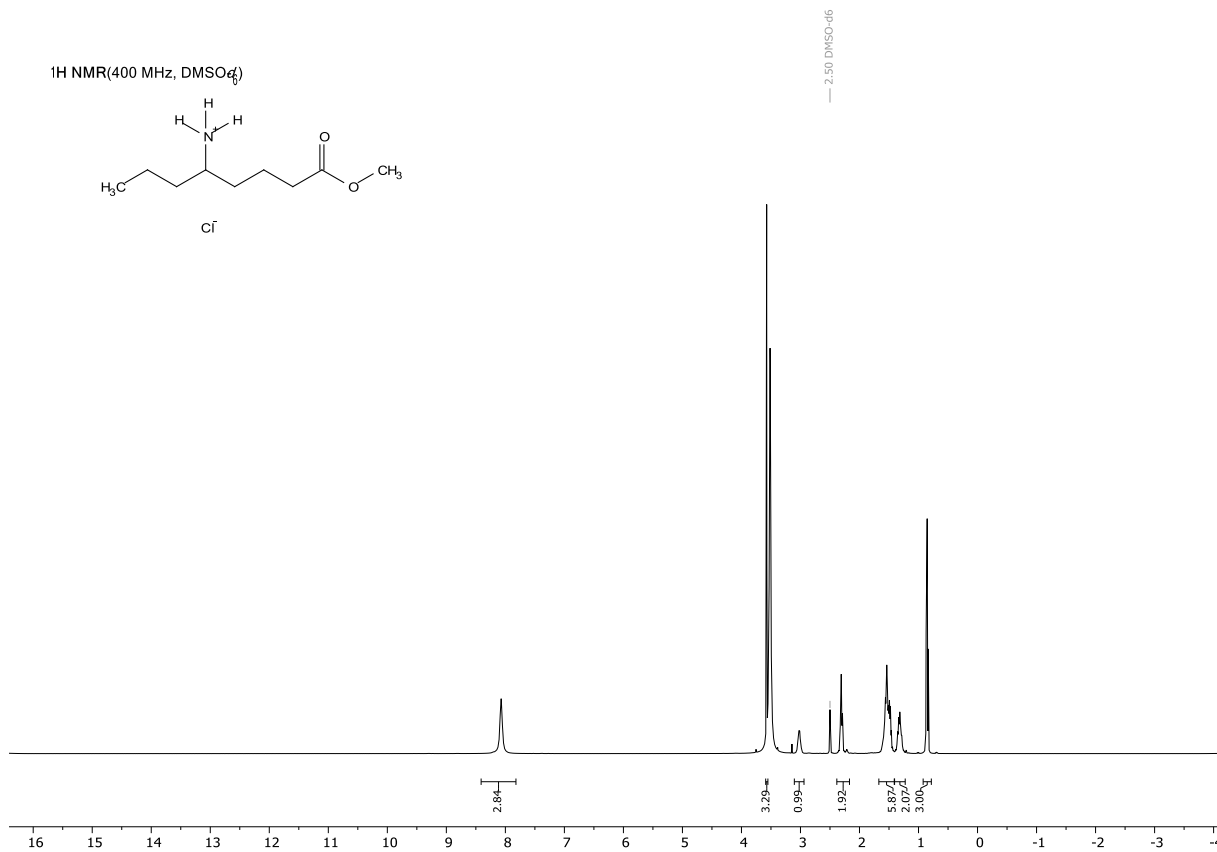

<sup>13</sup>C{<sup>1</sup>H} NMR(101 MHz, DMSO-d<sub>6</sub>)

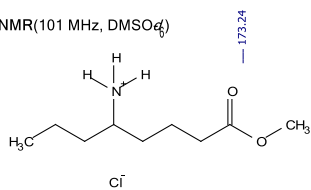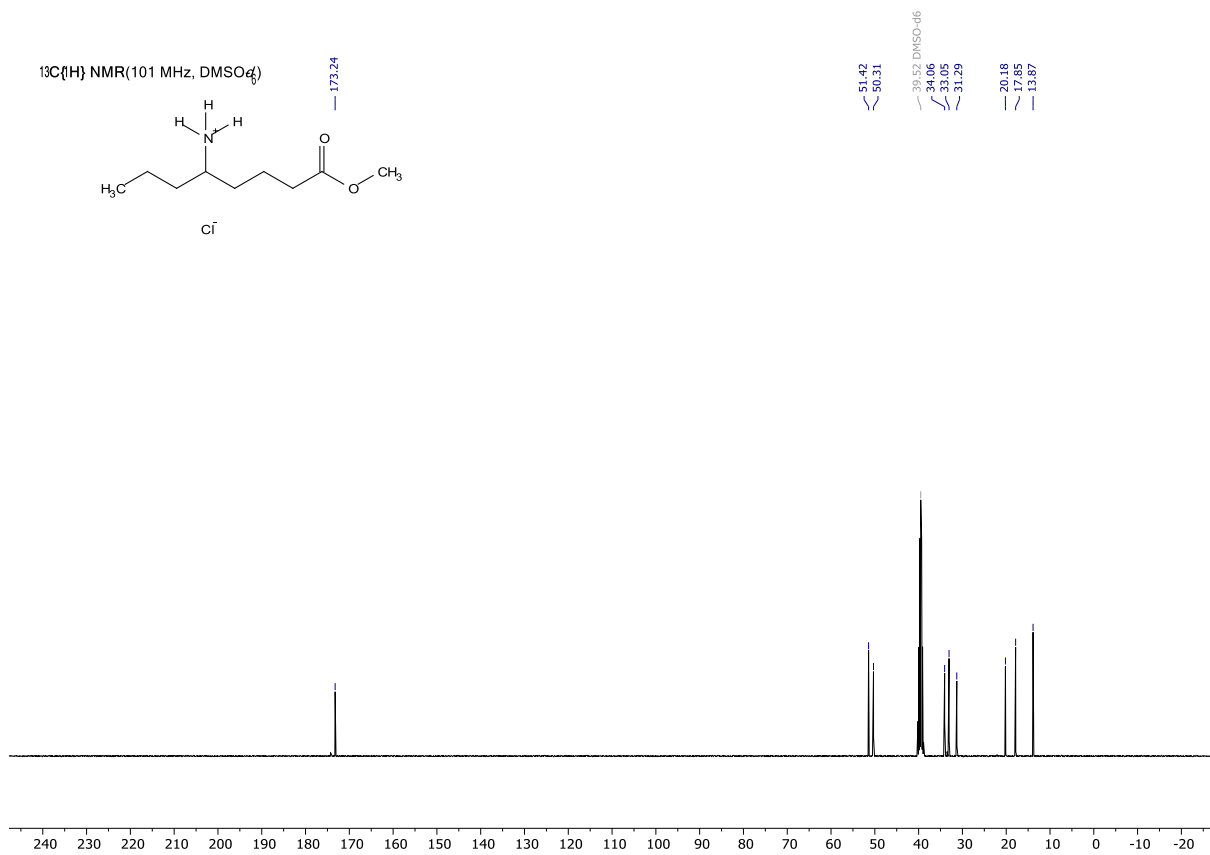

$^1\text{H}$  NMR(400 MHz, Chloroform- $d_3$ )

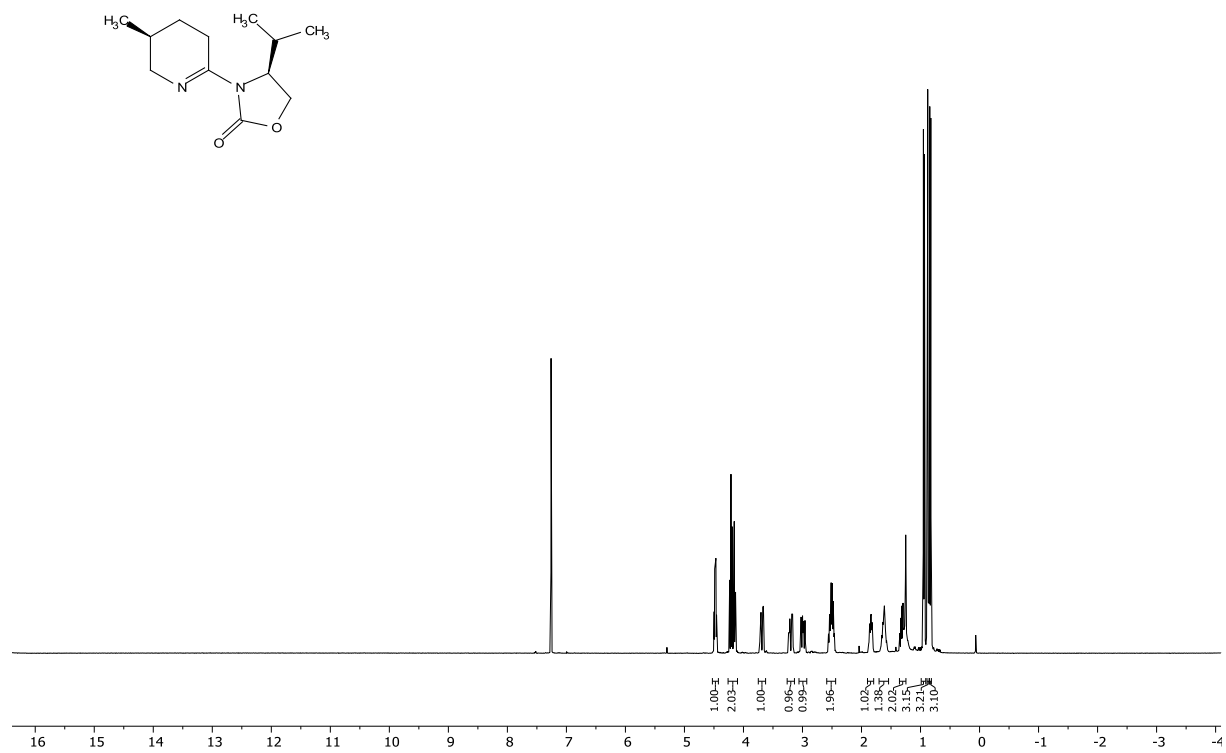

$^{13}\text{C}\{^1\text{H}\}$  NMR(101 MHz, Chloroform- $d_3$ )

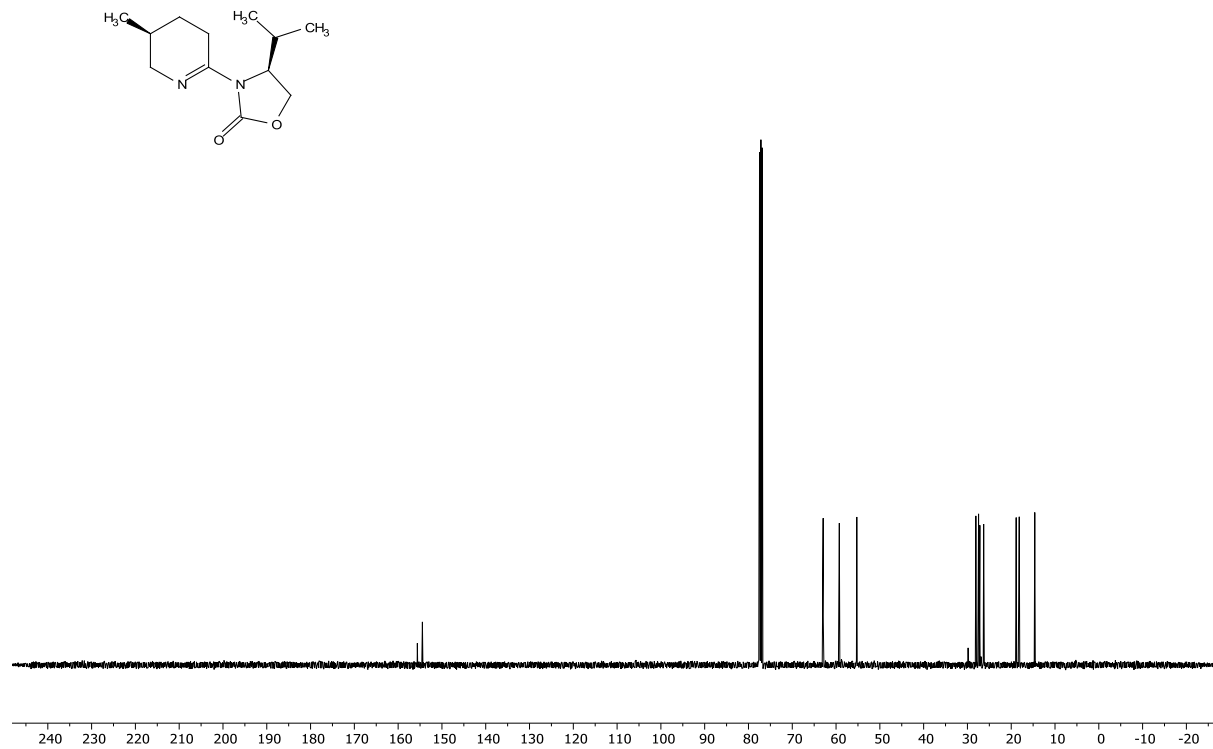

Supplement: ANIE-60-6425-s001.pdf [file ANIE-60-6425-s001.pdf]
